# Supplementary material for: Knoevenagel-IMHDA and -IMSDA sequences for the synthesis of chiral condensed O,N-, S,N- and N-heterocycles
Source: Royal Society of Chemistry journal article supplement (doi:10.1039/d4ra08353a), 2025-01-01
Supplement: d4ra08353a1.pdf [file d4ra08353a1.pdf]

## Supporting information

### **Knoevenagel-IMHDA and -IMSDA sequences for the synthesis of chiral condensed *O,N*-, *S,N*- and *N*-heterocycles**

Mihály Kajtár,<sup>a,b</sup> Sándor Balázs Király,<sup>a\*</sup> Attila Bényei,<sup>c</sup> Attila Kiss-Szikszai,<sup>a</sup> Anita Kónya-Ábrahám,<sup>a</sup> Lilla Borbála Horváth,<sup>d</sup> Szilvia Bősze,<sup>d</sup> Andras Kotschy,<sup>e</sup> Attila Paczal,<sup>e</sup> Tibor Kurtán<sup>a\*</sup>

<sup>a</sup>*Department of Organic Chemistry, University of Debrecen, Debrecen 4032, Egyetem square 1, Hungary.*

<sup>b</sup>*Doctoral School of Chemistry, University of Debrecen, 4032 Debrecen, Egyetem square 1, Hungary*

<sup>c</sup>*Department of Physical Chemistry, University of Debrecen, 4032 Debrecen, Egyetem square 1, Hungary*

<sup>d</sup>*Hungarian Research Network (HUN-REN), Research Group of Peptide Chemistry, Eötvös Loránd University, H1117 Budapest, Hungary.*

<sup>e</sup>*Servier Research Institute of Medicinal Chemistry, Budapest 1031, Hungary.*

## Table of contents

|                                                                                                                                                 |     |
|-------------------------------------------------------------------------------------------------------------------------------------------------|-----|
| Table of contents.....                                                                                                                          | 2   |
| Table of schemes.....                                                                                                                           | 2   |
| Table of figures.....                                                                                                                           | 2   |
| 1.1 Preparation of the starting materials of the domino Knoevenagel-cyclization sequences....                                                   | 9   |
| 1.2 NMR spectra for the starting materials of domino-Knoevenagel-cyclization reactions ...                                                      | 11  |
| 2. Mechanisms of the multi-step domino Knoevenagel-IMHDA reactions with Meldrum's acid.....                                                     | 13  |
| 3. Spectral data used for the determination of relative configuration 1.....                                                                    | 15  |
| 4. NMR spectra of the products.....                                                                                                             | 17  |
| 5. X-Ray diffraction data.....                                                                                                                  | 125 |
| 6. <i>In vitro</i> antiproliferative activity of the products of the domino reactions against U87, A2780 and HT-29 human cancer cell lines..... | 134 |
| 7. References: .....                                                                                                                            | 136 |

## Table of schemes

|                                                                                                                                                              |    |
|--------------------------------------------------------------------------------------------------------------------------------------------------------------|----|
| Scheme S1. Preparation of compound <b>S4</b> with reductive amination of cinnamaldehyde ( <b>S1</b> ).....                                                   | 9  |
| Scheme S2. Acetylation of the secondary amine <b>S4</b> .....                                                                                                | 9  |
| Scheme S3. Acetal cleavage of <b>S5</b> resulting in <b>1d</b> . .....                                                                                       | 10 |
| Scheme S4. Mechanism for the multistep domino Knoevenagel-IMHDA reaction of substrate <b>1a</b> with Meldrum's acid in presence of different amines. ....    | 13 |
| Scheme S5. Reaction mechanism of the multistep domino Knoevenagel-cyclization sequence of <b>1a</b> and Meldrum's acid in presence of Et <sub>3</sub> N..... | 14 |

## Table of figures

|                                                                                                                                                                                                                                                           |    |
|-----------------------------------------------------------------------------------------------------------------------------------------------------------------------------------------------------------------------------------------------------------|----|
| Figure S1. <sup>1</sup> H-NMR spectrum of the ( <i>E</i> )- <i>N</i> -cinnamyl- <i>N</i> -(3-oxopropyl)acetamide ( <b>1d</b> ) in CDCl <sub>3</sub> at 400 MHz. ....                                                                                      | 11 |
| Figure S2. <sup>13</sup> C-NMR spectrum of the ( <i>E</i> )- <i>N</i> -cinnamyl- <i>N</i> -(3-oxopropyl)acetamide ( <b>1d</b> ) in CDCl <sub>3</sub> at 100 MHz. ....                                                                                     | 12 |
| Table S1. Coupling constant data of the methine protons attached to the chirality centers and characteristic NOE effects observed for compounds <b>2</b> . ....                                                                                           | 15 |
| Table S2. Coupling constant data of the methine protons attached to the chirality centers and characteristic NOE effects observed for compounds <b>5</b> . ....                                                                                           | 16 |
| Figure S3. <sup>1</sup> H-NMR spectrum of the <i>rac</i> -(6 <i>aR</i> *,12 <i>S</i> *,12 <i>aS</i> *)- <b>3aa</b> in DMSO- <i>d</i> <sub>6</sub> at 500 MHz. ....                                                                                        | 17 |
| Figure S4. <sup>13</sup> C-NMR spectrum of the <i>rac</i> -(6 <i>aR</i> *,12 <i>S</i> *,12 <i>aS</i> *)- <b>3aa</b> in CDCl <sub>3</sub> at 100 MHz. ....                                                                                                 | 18 |
| Figure S5. ROESY spectrum of the <i>rac</i> -(6 <i>aR</i> *,12 <i>S</i> *,12 <i>aS</i> *)- <b>3aa</b> in CDCl <sub>3</sub> at 500 MHz. ....                                                                                                               | 19 |
| Figure S6. <sup>1</sup> H-NMR spectrum of the <i>rac</i> -(6 <i>aR</i> *,12 <i>S</i> *,12 <i>aS</i> *)- <b>3ab</b> in CDCl <sub>3</sub> at 500 MHz. ....                                                                                                  | 20 |
| Figure S7. <sup>13</sup> C-NMR spectrum of the <i>rac</i> -(6 <i>aR</i> *,12 <i>S</i> *,12 <i>aS</i> *)- <b>3ab</b> in CDCl <sub>3</sub> at 100 MHz. ....                                                                                                 | 21 |
| Figure S8. ROESY spectrum of the <i>rac</i> -(6 <i>aR</i> *,12 <i>S</i> *,12 <i>aS</i> *)- <b>3ab</b> in CDCl <sub>3</sub> at 500 MHz. ....                                                                                                               | 22 |
| Figure S9. <sup>1</sup> H-NMR spectrum of the <i>rac</i> -(6 <i>aR</i> *,12 <i>S</i> *,12 <i>aS</i> *)- <b>3ac</b> in DMSO- <i>d</i> <sub>6</sub> at 500 MHz. ....                                                                                        | 23 |
| Figure S10. <sup>13</sup> C-NMR spectrum of the <i>rac</i> -(6 <i>aR</i> *,12 <i>S</i> *,12 <i>aS</i> *)- <b>3ac</b> in DMSO- <i>d</i> <sub>6</sub> at 125 MHz. ....                                                                                      | 24 |
| Figure S11. ROESY spectrum of the <i>rac</i> -(6 <i>aR</i> *,12 <i>S</i> *,12 <i>aS</i> *)- <b>3ac</b> in DMSO- <i>d</i> <sub>6</sub> at 500 MHz. ....                                                                                                    | 25 |
| Figure S12. <sup>1</sup> H-NMR spectrum of the <i>rac</i> -(6 <i>aR</i> *,12 <i>S</i> *,12 <i>aS</i> *)- <b>3ad</b> and <i>rac</i> -(6 <i>aR</i> *,12 <i>R</i> *,12 <i>aS</i> *)- <i>epi</i> - <b>3ad</b> in DMSO- <i>d</i> <sub>6</sub> at 500 MHz. .... | 26 |
| Figure S13. <sup>13</sup> C-NMR spectrum of <i>rac</i> -(6 <i>aR</i> *,12 <i>S</i> *,12 <i>aS</i> *)- <b>3ag</b> and <i>rac</i> -(6 <i>aR</i> *,12 <i>R</i> *,12 <i>aS</i> *)- <i>epi</i> - <b>3ag</b> in CDCl <sub>3</sub> at 100 MHz. ....              | 27 |
| Figure S14. ROESY spectrum of the <i>rac</i> -(6 <i>aR</i> *,12 <i>S</i> *,12 <i>aS</i> *)- <b>3ad</b> and <i>rac</i> -(6 <i>aR</i> *,12 <i>R</i> *,12 <i>aS</i> *)- <i>epi</i> - <b>3ad</b> in DMSO- <i>d</i> <sub>6</sub> at 500 MHz. ....              | 28 |
| Figure S15. <sup>1</sup> H-NMR spectrum of the <i>rac</i> -(6 <i>aR</i> *,12 <i>S</i> *,12 <i>aS</i> *)- <b>3ae</b> in acetone- <i>d</i> <sub>6</sub> at 500 MHz. ....                                                                                    | 29 |
| Figure S16. <sup>13</sup> C-NMR spectrum of the <i>rac</i> -(6 <i>aR</i> *,12 <i>S</i> *,12 <i>aS</i> *)- <b>3ae</b> in acetone- <i>d</i> <sub>6</sub> at 125 MHz. ....                                                                                   | 30 |
| Figure S17. ROESY spectrum of the <i>rac</i> -(6 <i>aR</i> *,12 <i>S</i> *,12 <i>aS</i> *)- <b>3ae</b> in acetone- <i>d</i> <sub>6</sub> at 500 MHz. ....                                                                                                 | 31 |
| Figure S18. <sup>1</sup> H-NMR spectrum of the <i>rac</i> -(4 <i>R</i> *,4 <i>aS</i> *,10 <i>bS</i> *)- <b>2af</b> and <i>rac</i> -(4 <i>R</i> *,4 <i>aS</i> *,10 <i>bR</i> *)- <i>epi</i> - <b>2af</b> in DMSO- <i>d</i> <sub>6</sub> at 400 MHz. ....   | 32 |
| Figure S19. <sup>13</sup> C-NMR spectrum of the <i>rac</i> -(4 <i>R</i> *,4 <i>aS</i> *,10 <i>bS</i> *)- <b>2af</b> and <i>rac</i> -(4 <i>R</i> *,4 <i>aS</i> *,10 <i>bR</i> *)- <i>epi</i> - <b>2af</b> in DMSO- <i>d</i> <sub>6</sub> at 100 MHz. ....  | 33 |

|                                                                                                                                                                                                                                         |    |
|-----------------------------------------------------------------------------------------------------------------------------------------------------------------------------------------------------------------------------------------|----|
| Figure S20. NOESY spectrum of the <i>rac</i> -(4 <i>R</i> *,4 <i>aS</i> *,10 <i>bS</i> *)-2af and <i>rac</i> -(4 <i>R</i> *,4 <i>aS</i> *,10 <i>bR</i> *)- <i>epi</i> -2af in DMSO- <i>d</i> <sub>6</sub> at 400 MHz.....               | 34 |
| Figure S21. <sup>1</sup> H-NMR spectrum of the <i>rac</i> -(4 <i>R</i> *,4 <i>aS</i> *,10 <i>bS</i> *)-2ag and <i>rac</i> -(4 <i>R</i> *,4 <i>aS</i> *,10 <i>bR</i> *)- <i>epi</i> -2ag in DMSO- <i>d</i> <sub>6</sub> at 500 MHz.....  | 35 |
| Figure S22. <sup>13</sup> C-NMR spectrum of the <i>rac</i> -(4 <i>R</i> *,4 <i>aS</i> *,10 <i>bS</i> *)-2ag and <i>rac</i> -(4 <i>R</i> *,4 <i>aS</i> *,10 <i>bR</i> *)- <i>epi</i> -2ag in DMSO- <i>d</i> <sub>6</sub> at 125 MHz..... | 36 |
| Figure S23. ROESY spectrum of the <i>rac</i> -(4 <i>R</i> *,4 <i>aS</i> *,10 <i>bS</i> *)-2ag and <i>rac</i> -(4 <i>R</i> *,4 <i>aS</i> *,10 <i>bR</i> *)- <i>epi</i> -2ag in DMSO- <i>d</i> <sub>6</sub> at 500 MHz.....               | 37 |
| Figure S24. <sup>1</sup> H-NMR spectrum of the <i>rac</i> -(6 <i>aR</i> *,12 <i>S</i> *,12 <i>aS</i> *)-3ag in DMSO- <i>d</i> <sub>6</sub> at 500 MHz.<br>.....                                                                         | 38 |
| Figure S25. <sup>13</sup> C-NMR spectrum of the <i>rac</i> -(6 <i>aR</i> *,12 <i>S</i> *,12 <i>aS</i> *)-3ag in DMSO- <i>d</i> <sub>6</sub> at 90 MHz.                                                                                  | 39 |
| Figure S26. HSQC spectrum of the <i>rac</i> -(6 <i>aR</i> *,12 <i>S</i> *,12 <i>aS</i> *)-3ag in DMSO- <i>d</i> <sub>6</sub> at 500 MHz. ..                                                                                             | 40 |
| Figure S27. ROESY spectrum of the <i>rac</i> -(6 <i>aR</i> *,12 <i>S</i> *,12 <i>aS</i> *)-3ag in DMSO- <i>d</i> <sub>6</sub> at 500 MHz.                                                                                               | 41 |
| Figure S28. <sup>1</sup> H-NMR spectrum of the <i>rac</i> -(4 <i>R</i> *,4 <i>aS</i> *,10 <i>bS</i> *)-2ah and <i>rac</i> -(4 <i>R</i> *,4 <i>aS</i> *,10 <i>bR</i> *)- <i>epi</i> -2ah in CDCl <sub>3</sub> at 400 MHz. ....           | 42 |
| Figure S29. <sup>1</sup> H-NMR spectrum of the <i>rac</i> -(4 <i>R</i> *,4 <i>aS</i> *,10 <i>bS</i> *)-2ah and <i>rac</i> -(4 <i>R</i> *,4 <i>aS</i> *,10 <i>bR</i> *)- <i>epi</i> -2ah in CDCl <sub>3</sub> at 100 MHz. ....           | 43 |
| Figure S30. <sup>1</sup> H-NMR spectrum of the <i>rac</i> -(6 <i>aR</i> *,12 <i>S</i> *,12 <i>aS</i> *)-3ah in DMSO- <i>d</i> <sub>6</sub> at 500 MHz.<br>.....                                                                         | 44 |
| Figure S31. <sup>13</sup> C-NMR spectrum of the <i>rac</i> -(6 <i>aR</i> *,12 <i>S</i> *,12 <i>aS</i> *)-3ah in DMSO- <i>d</i> <sub>6</sub> at 125 MHz.<br>.....                                                                        | 45 |
| Figure S32. ROESY spectrum of the <i>rac</i> -(6 <i>aR</i> *,12 <i>S</i> *,12 <i>aS</i> *)-3ah in DMSO- <i>d</i> <sub>6</sub> at 500 MHz.                                                                                               | 46 |
| Figure S33. <sup>1</sup> H-NMR spectrum of <i>rac</i> -(4 <i>R</i> *,4 <i>aS</i> *,10 <i>bS</i> *)-2ai and <i>rac</i> -(4 <i>R</i> *,4 <i>aS</i> *,10 <i>bR</i> *)- <i>epi</i> -2ai in DMSO- <i>d</i> <sub>6</sub> at 500 MHz. ....     | 47 |
| Figure S34. <sup>13</sup> C-NMR spectrum of <i>rac</i> -(4 <i>R</i> *,4 <i>aS</i> *,10 <i>bS</i> *)-2ai and <i>rac</i> -(4 <i>R</i> *,4 <i>aS</i> *,10 <i>bR</i> *)- <i>epi</i> -2ai in DMSO- <i>d</i> <sub>6</sub> at 125 MHz.....     | 48 |
| Figure S35. HSQC spectrum of <i>rac</i> -(4 <i>R</i> *,4 <i>aS</i> *,10 <i>bS</i> *)-2ai and <i>rac</i> -(4 <i>R</i> *,4 <i>aS</i> *,10 <i>bR</i> *)- <i>epi</i> -2ai in DMSO- <i>d</i> <sub>6</sub> at 500 MHz. ....                   | 49 |
| Figure S36. ROESY spectrum of <i>rac</i> -(4 <i>R</i> *,4 <i>aS</i> *,10 <i>bS</i> *)-2ai and <i>rac</i> -(4 <i>R</i> *,4 <i>aS</i> *,10 <i>bR</i> *)- <i>epi</i> -2ai in DMSO- <i>d</i> <sub>6</sub> at 500 MHz. ....                  | 50 |
| Figure S37. <sup>1</sup> H-NMR spectrum of <i>rac</i> -(4 <i>R</i> *,4 <i>aS</i> *,10 <i>bS</i> *)-2bi and <i>rac</i> -(4 <i>R</i> *,4 <i>aS</i> *,10 <i>bR</i> *)- <i>epi</i> -2bi in DMSO- <i>d</i> <sub>6</sub> at 500 MHz.....      | 51 |
| Figure S38. <sup>13</sup> C-NMR spectrum of <i>rac</i> -(4 <i>R</i> *,4 <i>aS</i> *,10 <i>bS</i> *)-2bi and <i>rac</i> -(4 <i>R</i> *,4 <i>aS</i> *,10 <i>bR</i> *)- <i>epi</i> -2bi in DMSO- <i>d</i> <sub>6</sub> at 125 MHz.....     | 52 |



|                                                                                                                                                                                                                                                      |    |
|------------------------------------------------------------------------------------------------------------------------------------------------------------------------------------------------------------------------------------------------------|----|
| Figure S39. HSQC spectrum of <i>rac</i> -(4 <i>R</i> *,4 <i>aS</i> *,10 <i>bS</i> *)- <b>2bi</b> and <i>rac</i> -(4 <i>R</i> *,4 <i>aS</i> *,10 <i>bR</i> *)- <i>epi</i> - <b>2bi</b> in DMSO- <i>d</i> <sub>6</sub> at 500 MHz. ....                | 53 |
| Figure S40. <sup>1</sup> H-NMR spectrum of <i>rac</i> -(4 <i>R</i> *,4 <i>aS</i> *,10 <i>bS</i> *)- <b>2ci</b> and <i>rac</i> -(4 <i>R</i> *,4 <i>aS</i> *,10 <i>bR</i> *)- <i>epi</i> - <b>2ci</b> in DMSO- <i>d</i> <sub>6</sub> at 500 MHz. ....  | 54 |
| Figure S41. <sup>13</sup> C-NMR spectrum of <i>rac</i> -(4 <i>R</i> *,4 <i>aS</i> *,10 <i>bS</i> *)- <b>2ci</b> and <i>rac</i> -(4 <i>R</i> *,4 <i>aS</i> *,10 <i>bR</i> *)- <i>epi</i> - <b>2ci</b> in DMSO- <i>d</i> <sub>6</sub> at 125 MHz. .... | 55 |
| Figure S42. HSQC spectrum of <i>rac</i> -(4 <i>R</i> *,4 <i>aS</i> *,10 <i>bS</i> *)- <b>2ci</b> and <i>rac</i> -(4 <i>R</i> *,4 <i>aS</i> *,10 <i>bR</i> *)- <i>epi</i> - <b>2ci</b> in DMSO- <i>d</i> <sub>6</sub> at 500 MHz. ....                | 56 |
| Figure S43. <sup>1</sup> H-NMR spectrum of the <i>rac</i> -(4 <i>R</i> *,4 <i>aS</i> *,10 <i>bS</i> *)- <b>4aj</b> in DMSO- <i>d</i> <sub>6</sub> at 400 MHz. ....                                                                                   | 57 |
| Figure S44. <sup>13</sup> C-NMR spectrum of the <i>rac</i> -(4 <i>R</i> *,4 <i>aS</i> *,10 <i>bS</i> *)- <b>4aj</b> in DMSO- <i>d</i> <sub>6</sub> at 100 MHz. ....                                                                                  | 58 |
| Figure S45. NOESY spectrum of the <i>rac</i> -(4 <i>R</i> *,4 <i>aS</i> *,10 <i>bS</i> *)- <b>4aj</b> in DMSO- <i>d</i> <sub>6</sub> at 400 MHz. ....                                                                                                | 59 |
| Figure S46. <sup>1</sup> H-NMR spectrum of <i>rac</i> -(4 <i>R</i> *,4 <i>aS</i> *,10 <i>bS</i> *)- <b>2ak</b> in DMSO- <i>d</i> <sub>6</sub> at 500 MHz. ....                                                                                       | 60 |
| Figure S47. <sup>13</sup> C-NMR spectrum of <i>rac</i> -(4 <i>R</i> *,4 <i>aS</i> *,10 <i>bS</i> *)- <b>2ak</b> in CDCl <sub>3</sub> at 100 MHz. ....                                                                                                | 61 |
| Figure S48. HSQC spectrum of <i>rac</i> -(4 <i>R</i> *,4 <i>aS</i> *,10 <i>bS</i> *)- <b>2ak</b> in CDCl <sub>3</sub> at 400 MHz. ....                                                                                                               | 62 |
| Figure S49. <sup>1</sup> H-NMR spectrum of <i>rac</i> -(4 <i>R</i> *,4 <i>aS</i> *,10 <i>bS</i> *)- <b>2bk</b> in CDCl <sub>3</sub> at 500 MHz. ....                                                                                                 | 63 |
| Figure S50. <sup>13</sup> C-NMR spectrum of <i>rac</i> -(4 <i>R</i> *,4 <i>aS</i> *,10 <i>bS</i> *)- <b>2bk</b> in CDCl <sub>3</sub> at 125 MHz. ....                                                                                                | 64 |
| Figure S51. NOESY spectrum of <i>rac</i> -(4 <i>R</i> *,4 <i>aS</i> *,10 <i>bS</i> *)- <b>2bk</b> in CDCl <sub>3</sub> at 500 MHz. ....                                                                                                              | 65 |
| Figure S52. <sup>1</sup> H-NMR spectrum of <i>rac</i> -(4 <i>R</i> *,4 <i>aS</i> *,10 <i>bS</i> *)- <b>2bl</b> in CDCl <sub>3</sub> at 400 MHz. ....                                                                                                 | 66 |
| Figure S53. <sup>13</sup> C-NMR spectrum of <i>rac</i> -(4 <i>R</i> *,4 <i>aS</i> *,10 <i>bS</i> *)- <b>2bl</b> in CDCl <sub>3</sub> at 100 MHz. ....                                                                                                | 67 |
| Figure S54. NOESY spectrum of <i>rac</i> -(4 <i>R</i> *,4 <i>aS</i> *,10 <i>bS</i> *)- <b>2bl</b> in CDCl <sub>3</sub> at 400 MHz. ....                                                                                                              | 68 |
| Figure S55. <sup>1</sup> H-NMR spectrum of <i>rac</i> -(4 <i>R</i> *,4 <i>aS</i> *,10 <i>bR</i> *)- <i>epi</i> - <b>2am</b> in DMSO- <i>d</i> <sub>6</sub> at 500 MHz. ....                                                                          | 69 |
| Figure S56. <sup>13</sup> C-NMR spectrum of <i>rac</i> -(4 <i>R</i> *,4 <i>aS</i> *,10 <i>bR</i> *)- <i>epi</i> - <b>2am</b> in DMSO- <i>d</i> <sub>6</sub> at 90 MHz. ....                                                                          | 70 |
| Figure S57. HSQC spectrum of <i>rac</i> -(4 <i>R</i> *,4 <i>aS</i> *,10 <i>bR</i> *)- <i>epi</i> - <b>2am</b> in DMSO- <i>d</i> <sub>6</sub> at 400 MHz. ....                                                                                        | 71 |
| Figure S58. ROESY spectrum of <i>rac</i> -(4 <i>R</i> *,4 <i>aS</i> *,10 <i>bR</i> *)- <i>epi</i> - <b>2am</b> in DMSO- <i>d</i> <sub>6</sub> at 500 MHz. ....                                                                                       | 72 |
| Figure S59. <sup>1</sup> H-NMR spectrum of <i>rac</i> -(4 <i>R</i> *,4 <i>aS</i> *,10 <i>bR</i> *)- <i>epi</i> - <b>2bm</b> in DMSO- <i>d</i> <sub>6</sub> at 500 MHz. ....                                                                          | 73 |
| Figure S60. <sup>13</sup> C-NMR spectrum of <i>rac</i> -(4 <i>R</i> *,4 <i>aS</i> *,10 <i>bR</i> *)- <i>epi</i> - <b>2bm</b> in DMSO- <i>d</i> <sub>6</sub> at 100 MHz. ....                                                                         | 74 |
| Figure S61. HSQC spectrum of <i>rac</i> -(4 <i>R</i> *,4 <i>aS</i> *,10 <i>bR</i> *)- <i>epi</i> - <b>2bm</b> in DMSO- <i>d</i> <sub>6</sub> at 500 MHz. ....                                                                                        | 75 |
| Figure S62. <sup>1</sup> H-NMR spectrum of <i>rac</i> -(4 <i>R</i> *,4 <i>aS</i> *,10 <i>bS</i> *)- <b>2an</b> and <i>rac</i> -(4 <i>R</i> *,4 <i>aS</i> *,10 <i>bR</i> *)- <i>reg</i> - <b>2an</b> in DMSO- <i>d</i> <sub>6</sub> at 500 MHz. ....  | 76 |

|                                                                                                                                                                                                                                                                                                        |    |
|--------------------------------------------------------------------------------------------------------------------------------------------------------------------------------------------------------------------------------------------------------------------------------------------------------|----|
| Figure S63. $^{13}\text{C}$ -NMR spectrum of <i>rac</i> -(4 <i>R</i> *,4 <i>aS</i> *,10 <i>bS</i> *)- <b>2an</b> and <i>rac</i> -(4 <i>R</i> *,4 <i>aS</i> *,10 <i>bR</i> *)- <i>reg</i> - <b>2an</b> in DMSO- <i>d</i> <sub>6</sub> at 125 MHz. ....                                                  | 77 |
| Figure S64. HSQC spectrum of <i>rac</i> -(4 <i>R</i> *,4 <i>aS</i> *,10 <i>bS</i> *)- <b>2an</b> and <i>rac</i> -(4 <i>R</i> *,4 <i>aS</i> *,10 <i>bR</i> *)- <i>reg</i> - <b>2an</b> in DMSO- <i>d</i> <sub>6</sub> at 500 MHz. ....                                                                  | 78 |
| Figure S65. ROESY spectrum of <i>rac</i> -(4 <i>R</i> *,4 <i>aS</i> *,10 <i>bS</i> *)- <b>2an</b> and <i>rac</i> -(4 <i>R</i> *,4 <i>aS</i> *,10 <i>bR</i> *)- <i>reg</i> - <b>2an</b> in DMSO- <i>d</i> <sub>6</sub> at 500 MHz. ....                                                                 | 79 |
| Figure S66. $^1\text{H}$ -NMR spectrum of <i>rac</i> -(4 <i>R</i> *,4 <i>aS</i> *,10 <i>bS</i> *)- <b>2bn</b> and <i>rac</i> -(4 <i>R</i> *,4 <i>aS</i> *,10 <i>bR</i> *)- <i>reg</i> - <b>2bn</b> in DMSO- <i>d</i> <sub>6</sub> at 500 MHz. ....                                                     | 80 |
| Figure S67. $^{13}\text{C}$ -NMR spectrum of <i>rac</i> -(4 <i>R</i> *,4 <i>aS</i> *,10 <i>bS</i> *)- <b>2bn</b> and <i>rac</i> -(4 <i>R</i> *,4 <i>aS</i> *,10 <i>bR</i> *)- <i>reg</i> - <b>2bn</b> in DMSO- <i>d</i> <sub>6</sub> at 125 MHz. ....                                                  | 81 |
| Figure S68. $^1\text{H}$ -NMR spectrum of the ~5:4 mixture of <i>rac</i> -(1 <i>R</i> *,4 <i>R</i> *,4 <i>aS</i> *,10 <i>bR</i> *)- <i>dial</i> - <b>5a</b> and <i>rac</i> -(1 <i>S</i> *,4 <i>R</i> *,4 <i>aS</i> *,10 <i>bS</i> *)- <i>dia2</i> - <b>5a</b> in CDCl <sub>3</sub> at 500 MHz. ....    | 82 |
| Figure S69. $^{13}\text{C}$ -NMR spectrum of the ~5:4 mixture of <i>rac</i> -(1 <i>R</i> *,4 <i>R</i> *,4 <i>aS</i> *,10 <i>bR</i> *)- <i>dial</i> - <b>5a</b> and <i>rac</i> -(1 <i>S</i> *,4 <i>R</i> *,4 <i>aS</i> *,10 <i>bS</i> *)- <i>dia2</i> - <b>5a</b> in CDCl <sub>3</sub> at 125 MHz. .... | 83 |
| Figure S70. ROESY spectrum of the ~5:4 mixture of <i>rac</i> -(1 <i>R</i> *,4 <i>R</i> *,4 <i>aS</i> *,10 <i>bR</i> *)- <i>dial</i> - <b>5a</b> and <i>rac</i> -(1 <i>S</i> *,4 <i>R</i> *,4 <i>aS</i> *,10 <i>bS</i> *)- <i>dia2</i> - <b>5a</b> in CDCl <sub>3</sub> at 500 MHz. ....                | 84 |
| Figure S71. $^1\text{H}$ -NMR spectrum of the <i>rac</i> -(1 <i>R</i> *,4 <i>R</i> *,4 <i>aS</i> *,10 <i>bR</i> *)- <i>dial</i> - <b>5b</b> in CDCl <sub>3</sub> at 400 MHz. ....                                                                                                                      | 85 |
| Figure S72. $^{13}\text{C}$ -NMR spectrum of the <i>rac</i> -(1 <i>R</i> *,4 <i>R</i> *,4 <i>aS</i> *,10 <i>bR</i> *)- <i>dial</i> - <b>5b</b> in CDCl <sub>3</sub> at 100 MHz. ....                                                                                                                   | 86 |
| Figure S73. NOESY spectrum of the <i>rac</i> -(1 <i>R</i> *,4 <i>R</i> *,4 <i>aS</i> *,10 <i>bR</i> *)- <i>dial</i> - <b>5b</b> in CDCl <sub>3</sub> at 400 MHz. ....                                                                                                                                  | 87 |
| Figure S74. $^1\text{H}$ -NMR spectrum of the <i>rac</i> -(1 <i>S</i> *,4 <i>R</i> *,4 <i>aS</i> *,10 <i>bS</i> *)- <i>dia2</i> - <b>5b</b> in CDCl <sub>3</sub> at 400 MHz. ....                                                                                                                      | 88 |
| Figure S75. $^{13}\text{C}$ -NMR spectrum of the <i>rac</i> -(1 <i>S</i> *,4 <i>R</i> *,4 <i>aS</i> *,10 <i>bS</i> *)- <i>dia2</i> - <b>5b</b> in CDCl <sub>3</sub> at 100 MHz. ....                                                                                                                   | 89 |
| Figure S76. NOESY spectrum of the <i>rac</i> -(1 <i>S</i> *,4 <i>R</i> *,4 <i>aS</i> *,10 <i>bS</i> *)- <i>dia2</i> - <b>5b</b> in CDCl <sub>3</sub> at 400 MHz. ....                                                                                                                                  | 90 |
| Figure S77. $^1\text{H}$ -NMR spectrum of the <i>rac</i> -(1 <i>R</i> *,4 <i>R</i> *,4 <i>aS</i> *,10 <i>bR</i> *)- <i>dial</i> - <b>5c</b> in CDCl <sub>3</sub> at 500 MHz. ....                                                                                                                      | 91 |
| Figure S78. $^{13}\text{C}$ -NMR spectrum of the <i>rac</i> -(1 <i>R</i> *,4 <i>R</i> *,4 <i>aS</i> *,10 <i>bR</i> *)- <i>dial</i> - <b>5c</b> in CDCl <sub>3</sub> at 125 MHz. ....                                                                                                                   | 92 |
| Figure S79. ROESY spectrum of the <i>rac</i> -(1 <i>R</i> *,4 <i>R</i> *,4 <i>aS</i> *,10 <i>bR</i> *)- <i>dial</i> - <b>5c</b> in CDCl <sub>3</sub> at 500 MHz. ....                                                                                                                                  | 93 |

|                                                                                                                                                                                      |     |
|--------------------------------------------------------------------------------------------------------------------------------------------------------------------------------------|-----|
| Figure S80. <sup>1</sup> H-NMR spectrum of the <i>rac</i> -(1 <i>S</i> *,4 <i>R</i> *,4 <i>aS</i> *,10 <i>bS</i> *)- <i>dia2-5c</i> in CDCl <sub>3</sub> at 500 MHz. ....            | 94  |
| Figure S81. <sup>13</sup> C-NMR spectrum of the <i>rac</i> -(1 <i>S</i> *,4 <i>R</i> *,4 <i>aS</i> *,10 <i>bS</i> *)- <i>dia2-5c</i> in CDCl <sub>3</sub> at 125 MHz. ....           | 95  |
| Figure S82. ROESY spectrum of the <i>rac</i> -(1 <i>S</i> *,4 <i>R</i> *,4 <i>aS</i> *,10 <i>bS</i> *)- <i>dia2-5c</i> in CDCl <sub>3</sub> at 500 MHz. ....                         | 96  |
| Figure S83. <sup>1</sup> H-NMR spectrum of the <i>rac</i> -(1 <i>S</i> *,4 <i>R</i> *,4 <i>aS</i> *,10 <i>bS</i> *)- <i>dia2-5d</i> in CDCl <sub>3</sub> at 500 MHz. ....            | 97  |
| Figure S84. <sup>13</sup> C-NMR spectrum of the <i>rac</i> -(1 <i>S</i> *,4 <i>R</i> *,4 <i>aS</i> *,10 <i>bS</i> *)- <i>dia2-5d</i> in CDCl <sub>3</sub> at 125 MHz. ....           | 98  |
| Figure S85. ROESY spectrum of the <i>rac</i> -(1 <i>S</i> *,4 <i>R</i> *,4 <i>aS</i> *,10 <i>bS</i> *)- <i>dia2-5d</i> in CDCl <sub>3</sub> at 500 MHz. ....                         | 99  |
| Figure S86. <sup>1</sup> H-NMR spectrum of the <i>rac</i> -(1 <i>S</i> *,4 <i>R</i> *,4 <i>aS</i> *,10 <i>bS</i> *)- <i>dia2-5e</i> in CDCl <sub>3</sub> at 500 MHz. ....            | 100 |
| Figure S87. <sup>13</sup> C-NMR spectrum of the <i>rac</i> -(1 <i>S</i> *,4 <i>R</i> *,4 <i>aS</i> *,10 <i>bS</i> *)- <i>dia2-5e</i> in CDCl <sub>3</sub> at 125 MHz. ....           | 101 |
| Figure S88. HMBC spectrum of the <i>rac</i> -(1 <i>S</i> *,4 <i>R</i> *,4 <i>aS</i> *,10 <i>bS</i> *)- <i>dia2-5e</i> in CDCl <sub>3</sub> at 500 MHz. ....                          | 102 |
| Figure S89. ROESY spectrum of the <i>rac</i> -(1 <i>S</i> *,4 <i>R</i> *,4 <i>aS</i> *,10 <i>bS</i> *)- <i>dia2-5e</i> in CDCl <sub>3</sub> at 500 MHz. ....                         | 103 |
| Figure S90. <sup>1</sup> H-NMR spectrum of the <i>rac</i> -(1 <i>R</i> *,4 <i>R</i> *,4 <i>aS</i> *,10 <i>bR</i> *)- <i>dia1-5e</i> in CDCl <sub>3</sub> at 500 MHz. ....            | 104 |
| Figure S91. <sup>13</sup> C-NMR spectrum of the <i>rac</i> -(1 <i>R</i> *,4 <i>R</i> *,4 <i>aS</i> *,10 <i>bR</i> *)- <i>dia1-5e</i> in DMSO- <i>d</i> <sub>6</sub> at 125 MHz. .... | 105 |
| Figure S92. ROESY spectrum of the <i>rac</i> -(1 <i>R</i> *,4 <i>R</i> *,4 <i>aS</i> *,10 <i>bR</i> *)- <i>dia1-5e</i> in CDCl <sub>3</sub> at 500 MHz. ....                         | 106 |
| Figure S93. <sup>1</sup> H-NMR spectrum of the <i>rac</i> -(1 <i>S</i> *,4 <i>R</i> *,4 <i>aS</i> *,10 <i>bS</i> *)- <i>dia2-5f</i> in CDCl <sub>3</sub> at 400 MHz. ....            | 107 |
| Figure S94. <sup>13</sup> C-NMR spectrum of the <i>rac</i> -(1 <i>S</i> *,4 <i>R</i> *,4 <i>aS</i> *,10 <i>bS</i> *)- <i>dia2-5f</i> in DMSO- <i>d</i> <sub>6</sub> at 100 MHz. .... | 108 |
| Figure S95. <sup>1</sup> H-NMR spectrum of the <i>rac</i> -(1 <i>S</i> *,4 <i>R</i> *,4 <i>aS</i> *,10 <i>bS</i> *)- <i>dia2-5g</i> in CDCl <sub>3</sub> at 400 MHz. ....            | 109 |
| Figure S96. <sup>13</sup> C-NMR spectrum of the <i>rac</i> -(1 <i>S</i> *,4 <i>R</i> *,4 <i>aS</i> *,10 <i>bS</i> *)- <i>dia2-5g</i> in CDCl <sub>3</sub> at 100 MHz. ....           | 110 |

|                                                                                                                                                           |     |
|-----------------------------------------------------------------------------------------------------------------------------------------------------------|-----|
| Figure S97. $^1\text{H}$ -NMR spectrum of the <i>rac</i> -(4a <i>S</i> *,5 <i>R</i> *,10b <i>R</i> *)-6p in $\text{CDCl}_3$ at 400 MHz. ....              | 111 |
| Figure S98. $^{13}\text{C}$ -NMR spectrum of the <i>rac</i> -(4a <i>S</i> *,5 <i>R</i> *,10b <i>R</i> *)-6p in $\text{CDCl}_3$ at 100 MHz. ....           | 112 |
| Figure S99. $^1\text{H}$ -NMR spectrum of the <i>rac</i> -(4a <i>S</i> *,5 <i>R</i> *,9b <i>R</i> *)-6q in $\text{CDCl}_3$ at 400 MHz. ....               | 113 |
| Figure S100. $^{13}\text{C}$ -NMR spectrum of the <i>rac</i> -(4a <i>S</i> *,5 <i>R</i> *,9b <i>R</i> *)-6q in $\text{CDCl}_3$ at 100 MHz. ....           | 114 |
| Figure S101. NOESY spectrum of the <i>rac</i> -(4a <i>S</i> *,5 <i>R</i> *,9b <i>R</i> *)-6q in $\text{CDCl}_3$ at 400 MHz. ....                          | 115 |
| Figure S102. $^1\text{H}$ -NMR spectrum of the <i>rac</i> -(6 <i>R</i> *,6a <i>S</i> *,10a <i>R</i> *)-6r in $\text{CDCl}_3$ at 400 MHz. ....             | 116 |
| Figure S103. $^{13}\text{C}$ -NMR spectrum of the <i>rac</i> -(6 <i>R</i> *,6a <i>S</i> *,10a <i>R</i> *)-6r in $\text{CDCl}_3$ at 100 MHz. ..            | 117 |
| Figure S104. $^1\text{H}$ -NMR spectrum of the <i>rac</i> -(6 <i>R</i> *,6a <i>S</i> *,10a <i>R</i> *)-6s in $\text{CDCl}_3$ at 400 MHz. ....             | 118 |
| Figure S105. $^{13}\text{C}$ -NMR spectrum of the <i>rac</i> -(6 <i>R</i> *,6a <i>S</i> *,10a <i>R</i> *)-6s in $\text{CDCl}_3$ at 100 MHz. ....          | 119 |
| Figure S106. $^1\text{H}$ -NMR spectrum of the <i>rac</i> -(1 <i>R</i> *,4a <i>R</i> *,8a <i>S</i> *)-6k in acetone- $\text{d}_6$ at 500 MHz.<br>.....    | 120 |
| Figure S107. $^{13}\text{C}$ -NMR spectrum of the <i>rac</i> -(1 <i>R</i> *,4a <i>R</i> *,8a <i>S</i> *)-6k in acetone- $\text{d}_6$ at 125 MHz.<br>..... | 121 |
| Figure S108. ROESY spectrum of the <i>rac</i> -(1 <i>R</i> *,4a <i>R</i> *,8a <i>S</i> *)-6k in acetone- $\text{d}_6$ at 500 MHz. ....                    | 122 |
| Figure S109. $^1\text{H}$ -NMR spectrum of the <i>rac</i> -(1 <i>R</i> *,4a <i>R</i> *,8a <i>S</i> *)-6i in $\text{CDCl}_3$ at 400 MHz. ....              | 123 |
| Figure S110. $^{13}\text{C}$ -NMR spectrum of the <i>rac</i> -(1 <i>R</i> *,4a <i>R</i> *,8a <i>S</i> *)-6i in $\text{CDCl}_3$ at 100 MHz. ....           | 124 |

## 1.1 Preparation of the starting materials of the domino Knoevenagel-cyclization sequences

Substrates **1a-c** of the domino Knoevenagel-cyclization sequences were prepared on the basis of our publication.<sup>1</sup>

(*E*)-*N*-(3,3-diethoxypropyl)-3-phenylprop-2-en-1-amine (**1d**):

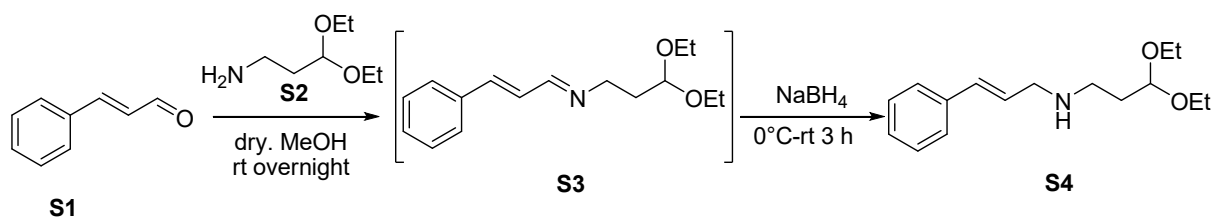

Scheme S1. Preparation of compound **S4** with reductive amination of cinnamaldehyde (**S1**).

In a flame-dried three-necked round-bottom flask equipped with a reflux condenser and a CaCl<sub>2</sub> drying tube, cinnamaldehyde (**S1**, 20 mmol) was dissolved in 20 ml MeOH and 3,3-diethoxypropane-1-amine (**S2**, 20 mmol, 1.0 equivalent) was added to the mixture, and it was stirred overnight at room temperature. The mixture was then cooled to 0 °C in an ice bath, and sodium tetrahydroborate (25 mmol, 1.25 equivalent) was added in two portions. The mixture was allowed to warm up to room temperature and stirred for two hours. The reaction mixture was then filtered through a celite plug and it was washed with methanol. The methanol was removed *in vacuo* and the resulting crude oil was dissolved in dichloromethane and extracted three times with water (30 ml). The organic phase was dried over MgSO<sub>4</sub>, filtered, washed and concentrated *in vacuo*, affording the secondary amine **S4**, which was used for further transformations without purification and characterization.

(*E*)-*N*-cinnamyl-*N*-(3,3-diethoxypropyl)acetamide (**S5**):

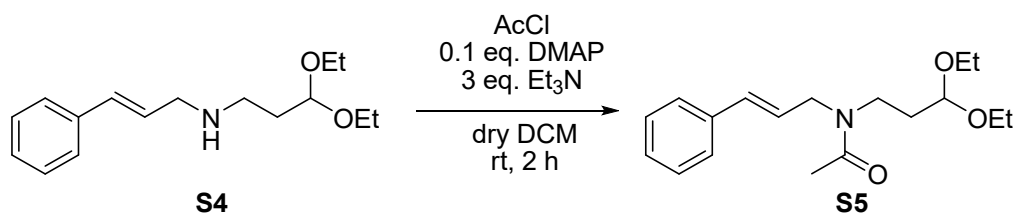

Scheme S2. Acetylation of the secondary amine **S4**.

500 mg **S4** amine derivative (2.17 mmol), DMAP (0.1 eq. 0.217 mmol) and triethyl amine (3 eq. 6.51 mmol) were dissolved in 10 ml dry dichloromethane and a solution of acetyl chloride (1.05 eq. 1 M in dichloromethane) was added to the mixture. The reaction was stirred at room

temperature for 2 hours, then the mixture was poured on 30 ml of water. It was extracted three times with 30 ml of dichloromethane. The combined organic phase was dried over MgSO<sub>4</sub>, filtered, washed and concentrated *in vacuo*, affording the amide derivative **S5**, which was used without further purification or characterisation.

(*E*)-*N*-cinnamyl-*N*-(3-oxopropyl)acetamide (**1d**):

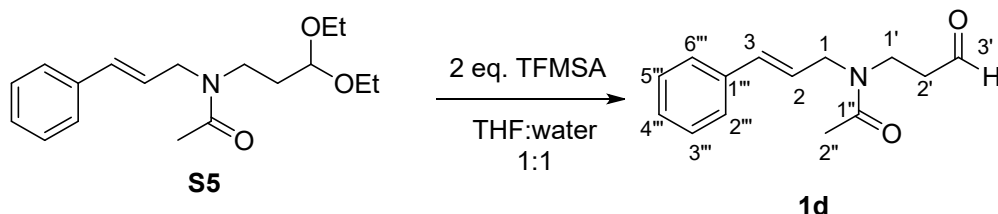

Scheme S3. Acetal cleavage of **S5** resulting in **1d**.

150 mg amide derivative **S5** (0.49 mmol) was dissolved in 4 ml water/THF 1:1 and 87  $\mu$ l of trifluoromethanesulfonic acid (TFMSA) was added to the mixture. The reaction was stirred for 2 hours and then it was poured on 50 ml of cc. NaHCO<sub>3</sub> solution, and it was extracted three times with 30 ml of dichloromethane. The organic phase was dried over MgSO<sub>4</sub>, filtered, washed and concentrated *in vacuo*. The crude product was purified with column chromatography (hexane/acetone 3:1) affording **1d** as yellow oil (91 % for three steps) R<sub>f</sub> = 0.19 (hexane/acetone 3:1).

<sup>1</sup>H NMR (400 MHz, CDCl<sub>3</sub>)  $\delta$  2.10 (s, 3 H, 2''-H), 2.70 - 2.84 (m, 2 H, 2'-H), 3.59 - 3.72 (m, 2 H, 1'-H), 3.95 - 4.21 (m, 2 H, 1-H), 5.99 - 6.23 (m, 1 H, 2-H), 6.37 - 6.55 (m, 1 H, 3-H), 7.14 - 7.45 (m, 5 H, Ph-H), 9.76 (s, 1 H, CHO).

<sup>13</sup>C NMR (100 MHz, CDCl<sub>3</sub>)  $\delta$  21.6 (C-2''), 40.3 (C-2'), 42.9 (C-1'), 51.5 (C-1), 124.0 and 126.4 (C-3''' and C-5'''), 128.0 (C-4'''), 128.6 and 128.7 (C-2''' and C-6'''), 132.0 (C-4'''), 136.0 (C-1'''), 171.1 (C-1''), 200.9 (CHO).

IR: (KBr)  $\nu$ : 2932, 2348, 2309, 1716, 1622, 1475, 1418, 1361, 1231, 1170, 1131, 1063, 1030.

HRMS: calcd. for C<sub>14</sub>H<sub>18</sub>NO<sub>2</sub> [M+H]<sup>+</sup> 232.1337, found 232.1338.

## 1.2 NMR spectra for the starting materials of domino-Knoevenagel-cyclization reactions

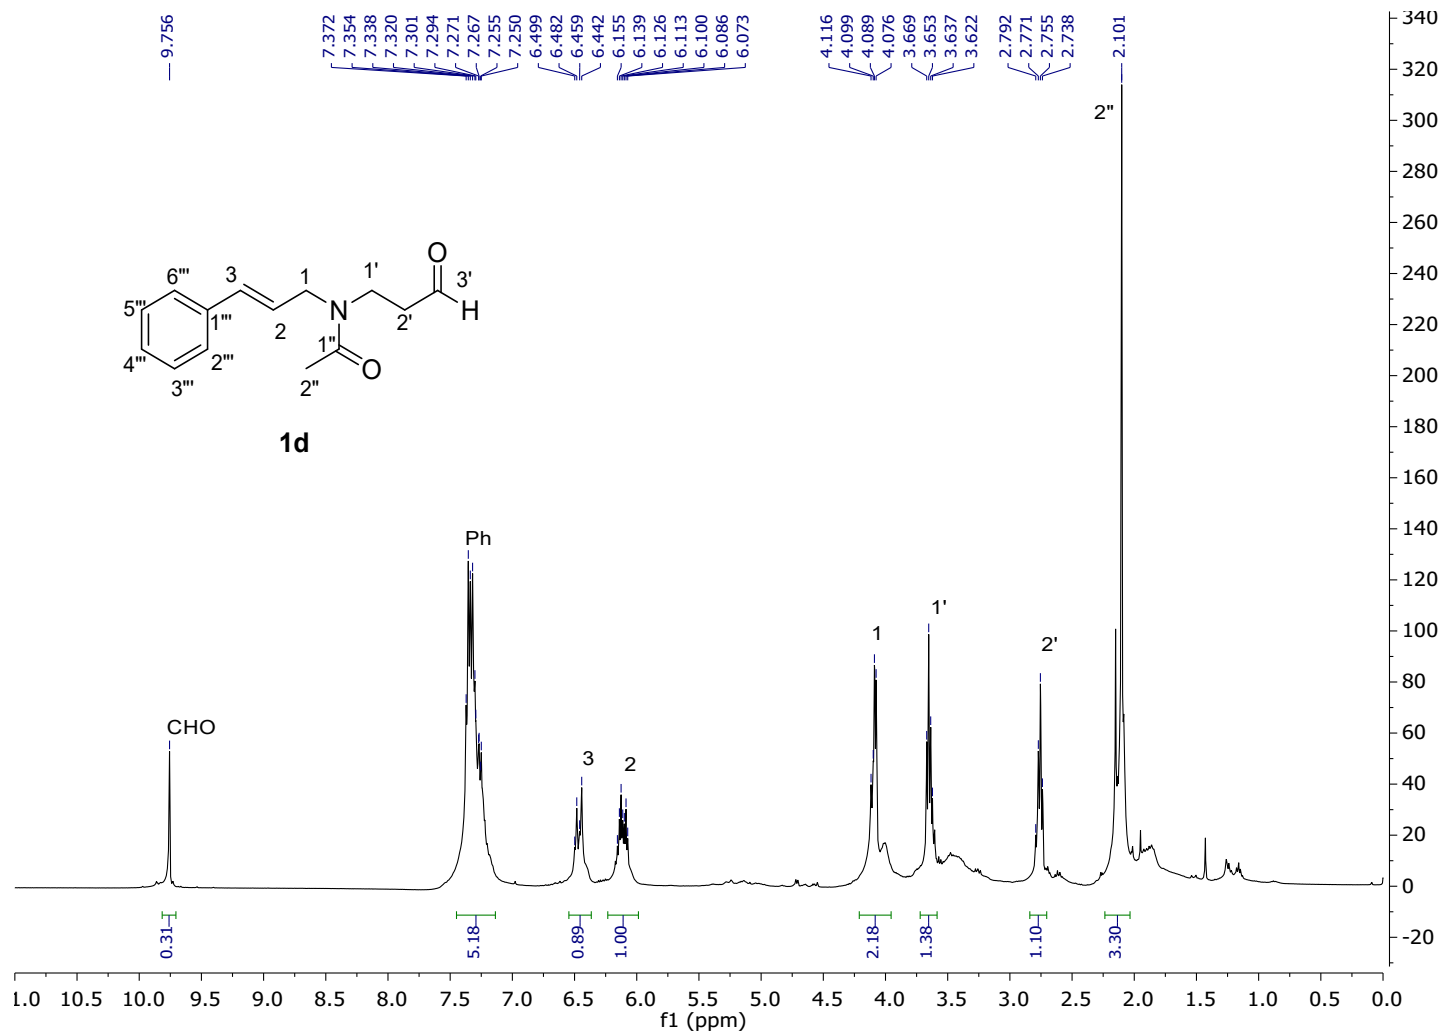

Figure S1. <sup>1</sup>H-NMR spectrum of the (*E*)-*N*-cinnamyl-*N*-(3-oxopropyl)acetamide (**1d**) in CDCl<sub>3</sub> at 400 MHz.

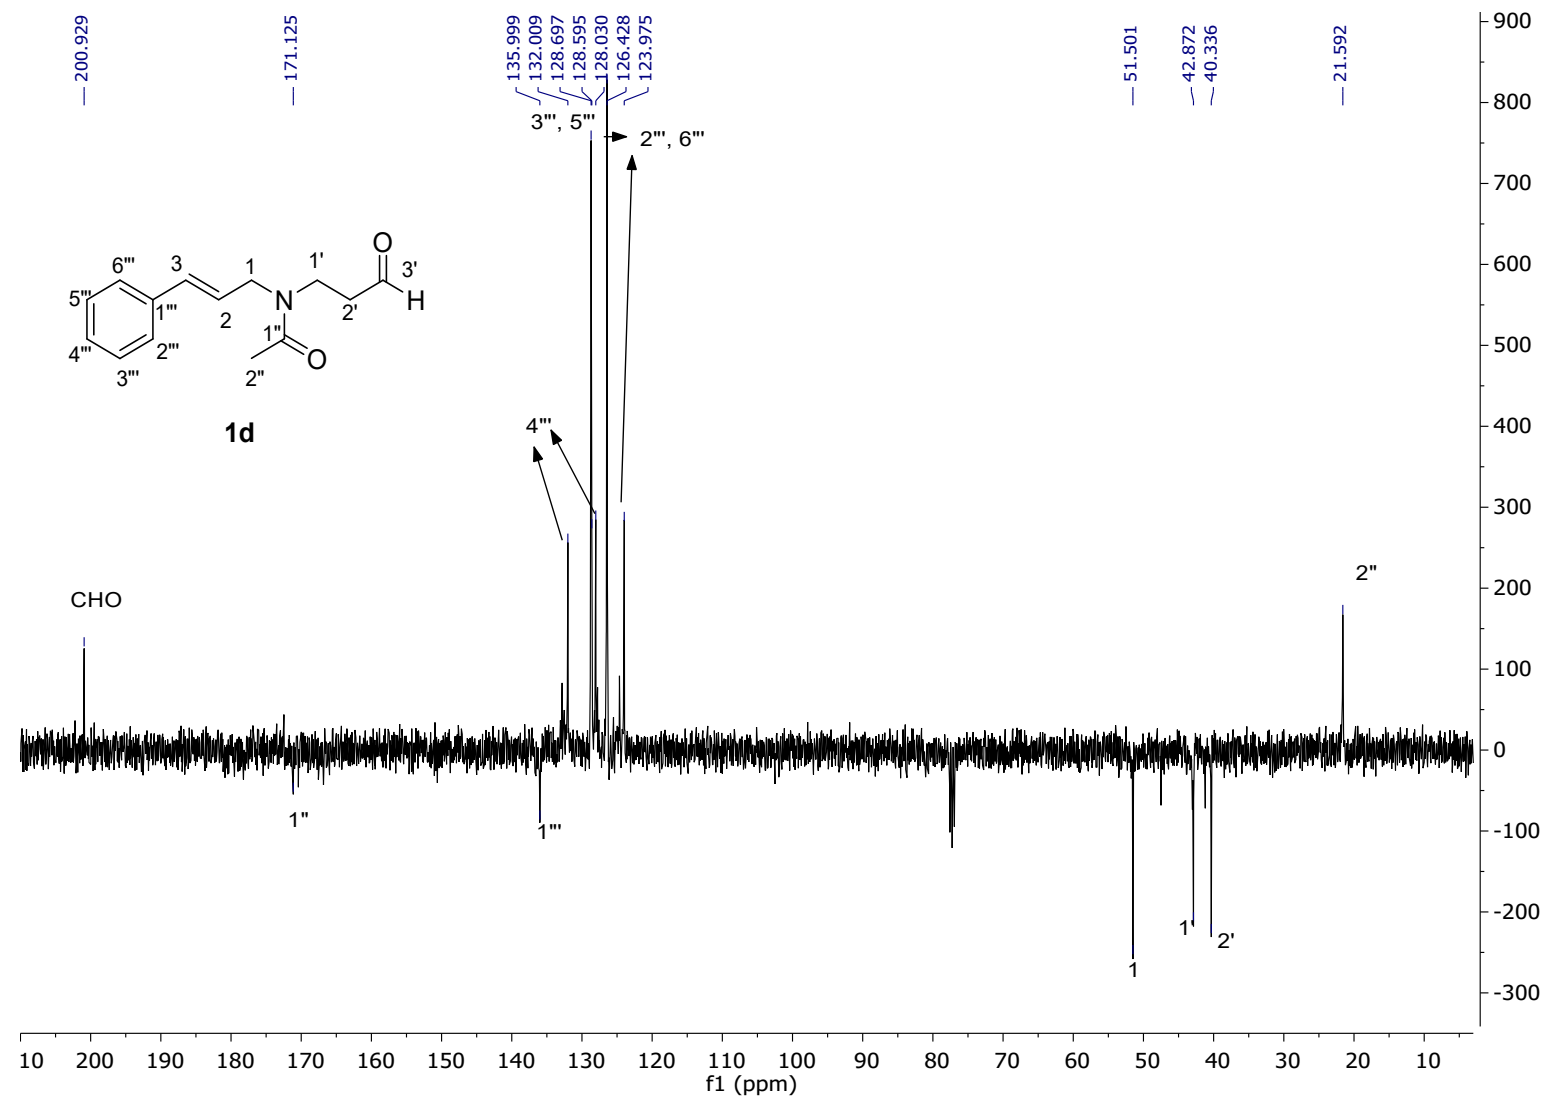

Figure S2. <sup>13</sup>C-NMR spectrum of the (*E*)-*N*-cinnamyl-*N*-(3-oxopropyl)acetamide (**1d**) in CDCl<sub>3</sub> at 100 MHz.



## 2. Mechanisms of the multi-step domino Knoevenagel-IMHDA reactions with Meldrum's acid.

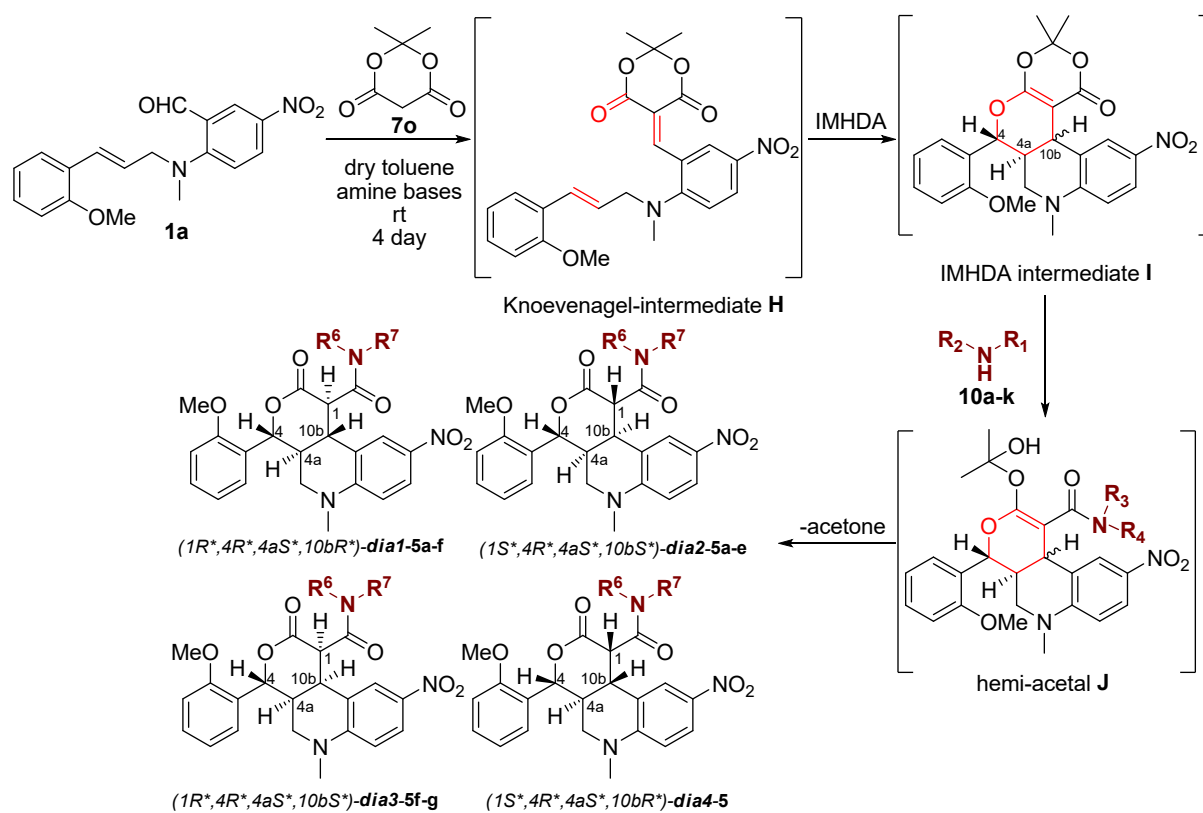

Scheme S4. Mechanism for the multistep domino Knoevenagel-IMHDA reaction of substrate **1a** with Meldrum's acid in presence of different amines.

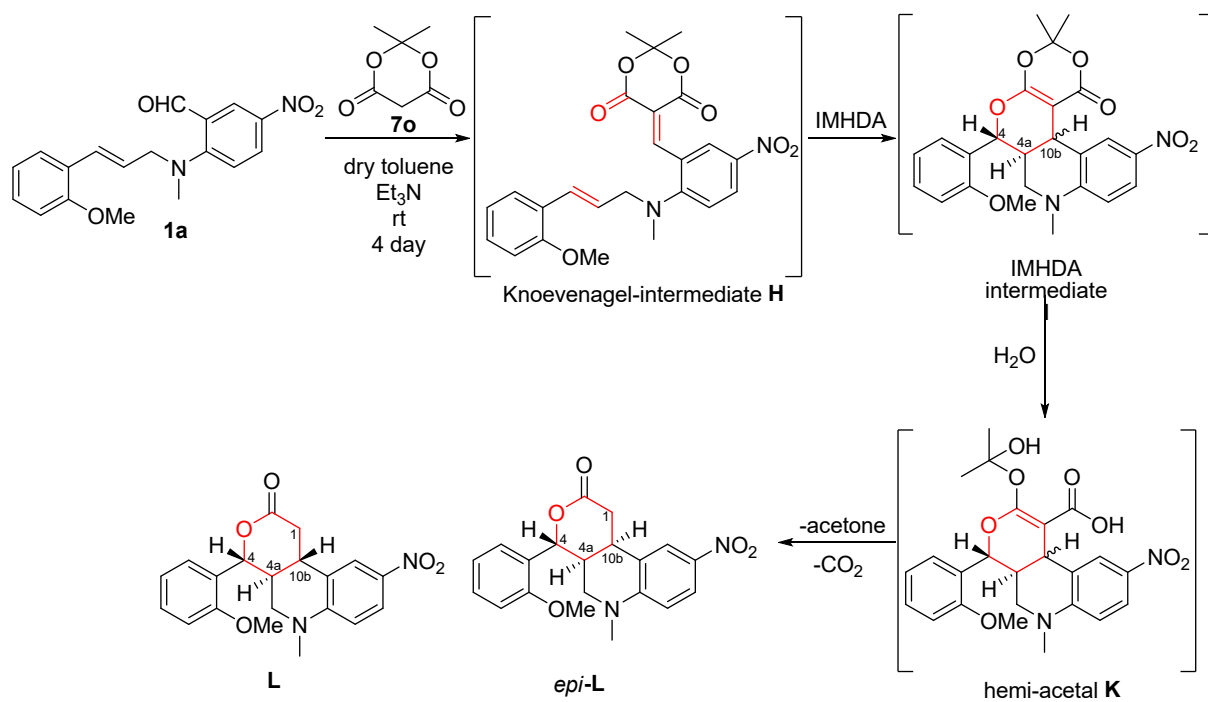

Scheme S5. Reaction mechanism of the multistep domino Knoevenagel-cyclization sequence of **1a** and Meldrum's acid in presence of  $\text{Et}_3\text{N}$ .

### 3. Spectral data used for the determination of the relative configuration

TABLE S1. Coupling constant data of the methine protons attached to the chirality centers and characteristic NOE effects observed for compounds **2**.

| Compound                   | J(4-H)                 | J(4a-H)         | J(10b-H)   | Characteristic NOE |
|----------------------------|------------------------|-----------------|------------|--------------------|
| <b>2af</b>                 | broad singlet          | broad multiplet | overlap    | 10b-H/4-H          |
| <i>epi-2af</i>             | d, 6.6 Hz              | multiplet       | d, 4.7 Hz  | 10b-H/4a-H         |
| <b>2ag</b>                 | broad singlet          | broad multiplet | overlap    | 10b-H/4-H          |
| <i>epi-2ag</i>             | d, 6.7 Hz              | multiplet       | overlap    | 10b-H/4a-H         |
| <b>2ah<sup>a</sup></b>     | overlap                | multiplet       | d, 6.6 Hz  | N/A                |
| <i>epi-2ah<sup>a</sup></i> | d, 4.6 Hz              | multiplet       | d, 4.6 Hz  | N/A                |
| <b>2ai</b>                 | broad singlet          | overlap         | d, 9.0 Hz  | 10b-H/4-H          |
| <i>epi-2ai</i>             | d, 6.2 Hz              | multiplet       | d, 5.2 Hz  | 10b-H/4a-H         |
| <b>2bi</b>                 | d, 10.0 Hz             | multiplet       | d, 11.0 Hz | N/A                |
| <i>epi-2bi</i>             | d, 5.3 Hz              | multiplet       | d, 4.2 Hz  | N/A                |
| <b>2ci</b>                 | d, 10.0 Hz             | multiplet       | d, 10.9 Hz | N/A                |
| <i>epi-2ci</i>             | broad doublet, 3.2 Hz  | broad multiplet | d, 4.1 Hz  | N/A                |
| <b>4aj</b>                 | d, 10.6 Hz             | multiplet       | d, 11.0 Hz | 10b-H/4-H          |
| <b>2ak</b>                 | broad singlet          | broad multiplet | d, 12.0 Hz | N/A                |
| <b>2bk</b>                 | d, 10.2 Hz             | overlap         | d, 11.2 Hz | 10b-H/4-H          |
| <b>2bl</b>                 | d, 10.1 Hz             | multiplet       | d, 11.2 Hz | 10b-H/4-H          |
| <i>epi-2am</i>             | broad singlet          | broad multiplet | d, 3.4 Hz  | 10b-H/4a-H         |
| <i>epi-2bm</i>             | d, 11 Hz               | overlap         | d, 3.5 Hz  | N/A                |
| <b>2an</b>                 | broad singlet, overlap | broad multiplet | d, 9.5 Hz  | none visible       |
| <i>reg-2an</i>             | d, 10.9 Hz             | multiplet       | d, 3.1 Hz  | 10b-H/4a-H         |
| <b>2bn</b>                 | d, 10.1 Hz             | overlap         | d, 11.0 Hz | N/A                |
| <i>reg-2bn</i>             | d, 11.4 Hz             | overlap         | d, 3.4 Hz  | N/A                |

a) relative configuration was assigned based on analogy, using the chemical shift and splitting of the 4-H signals.

**TABLE S2.** Coupling constant data of the protons attached to the chirality centers and characteristic NOE effects observed for compounds **5**.

| Compound                    | J(4-H)     | J(4a-H)   | J(10b-H)          | J(1-H)                 | Characteristic NOE  |
|-----------------------------|------------|-----------|-------------------|------------------------|---------------------|
| <i>dia1-5a</i>              | d, 10.4 Hz | multiplet | dd, 11.5, 10.5 Hz | d, 10.5 Hz             | 4-H/10b-H; 4a-H/1-H |
| <i>dia2-5a</i>              | d, 2.9 Hz  | multiplet | dd, 9.8, 5.2 Hz   | d, 9.8 Hz              | 4a-H/10b-H          |
| <i>dia1-5b</i>              | d, 10.5 Hz | multiplet | dd, 11.8, 10.2 Hz | d, 10.2 Hz             | 4-H/10b-H; 4a-H/1-H |
| <i>dia2-5b</i>              | d, 3.0 Hz  | overlap   | dd, 10.0, 4.5 Hz  | d, 10.0 Hz             | 4a-H/10b-H          |
| <i>dia1-5c</i>              | d, 10.3 Hz | multiplet | 11.5, 10.0 Hz     | d, 10.0 Hz             | 4-H/10b-H; 4a-H/1-H |
| <i>dia2-5c</i>              | d, 3.0 Hz  | multiplet | dd, 9.8, 4.7 Hz   | d, 9.8 Hz              | 4-H/1-H; 4a-H/10b-H |
| <i>dia2-5d</i> <sup>a</sup> | d, 2.5 Hz  | multiplet | overlap           | overlap                | overlapping signals |
| <i>dia1-5e</i>              | d, 4.0 Hz  | multiplet | overlap           | d, 9.3 Hz <sup>b</sup> | 4a-H/1-H            |
| <i>dia2-5e</i>              | d, 5.9 Hz  | overlap   | broad multiplet   | d, 6.7 Hz <sup>b</sup> | 4-H/1-H; 4a-H/10b-H |
| <i>dia2-5f</i>              | d, 4.9 Hz  | multiplet | dd, 8.4, 4.6 Hz   | overlap                | N/A                 |
| <i>dia2-5g</i> <sup>c</sup> | d, 3.9 Hz  | multiplet | overlap           | overlap                | N/A                 |

a) 10b-H and 1-H signals overlap, configuration was assigned based on analogy using the coupling constant of 4-H.

b) coupling constants are inconclusive, configuration was assigned using NOE correlations. c) due to the overlap of the 10b-H signal, configuration was assigned based on analogy using the chemical shift of 4-H.

#### 4. NMR spectra of the products

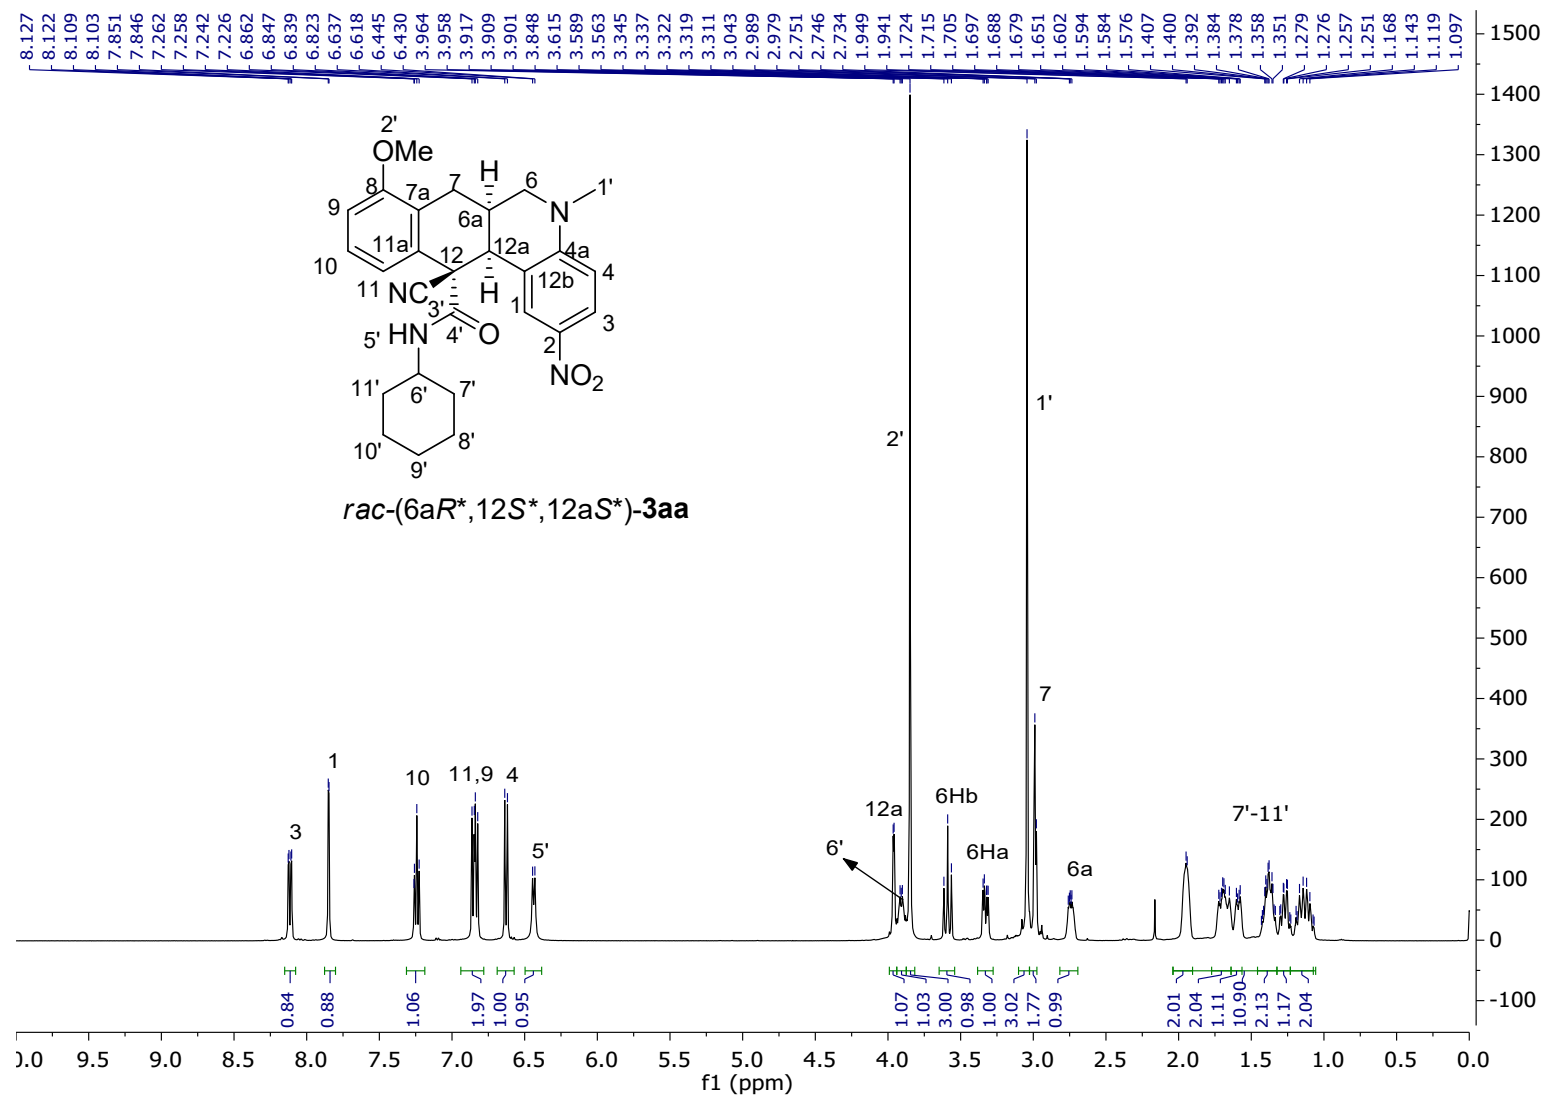

Figure S3. <sup>1</sup>H-NMR spectrum of the *rac*-(6aR\*,12S\*,12aS\*)-3aa in DMSO-d<sub>6</sub> at 500 MHz.

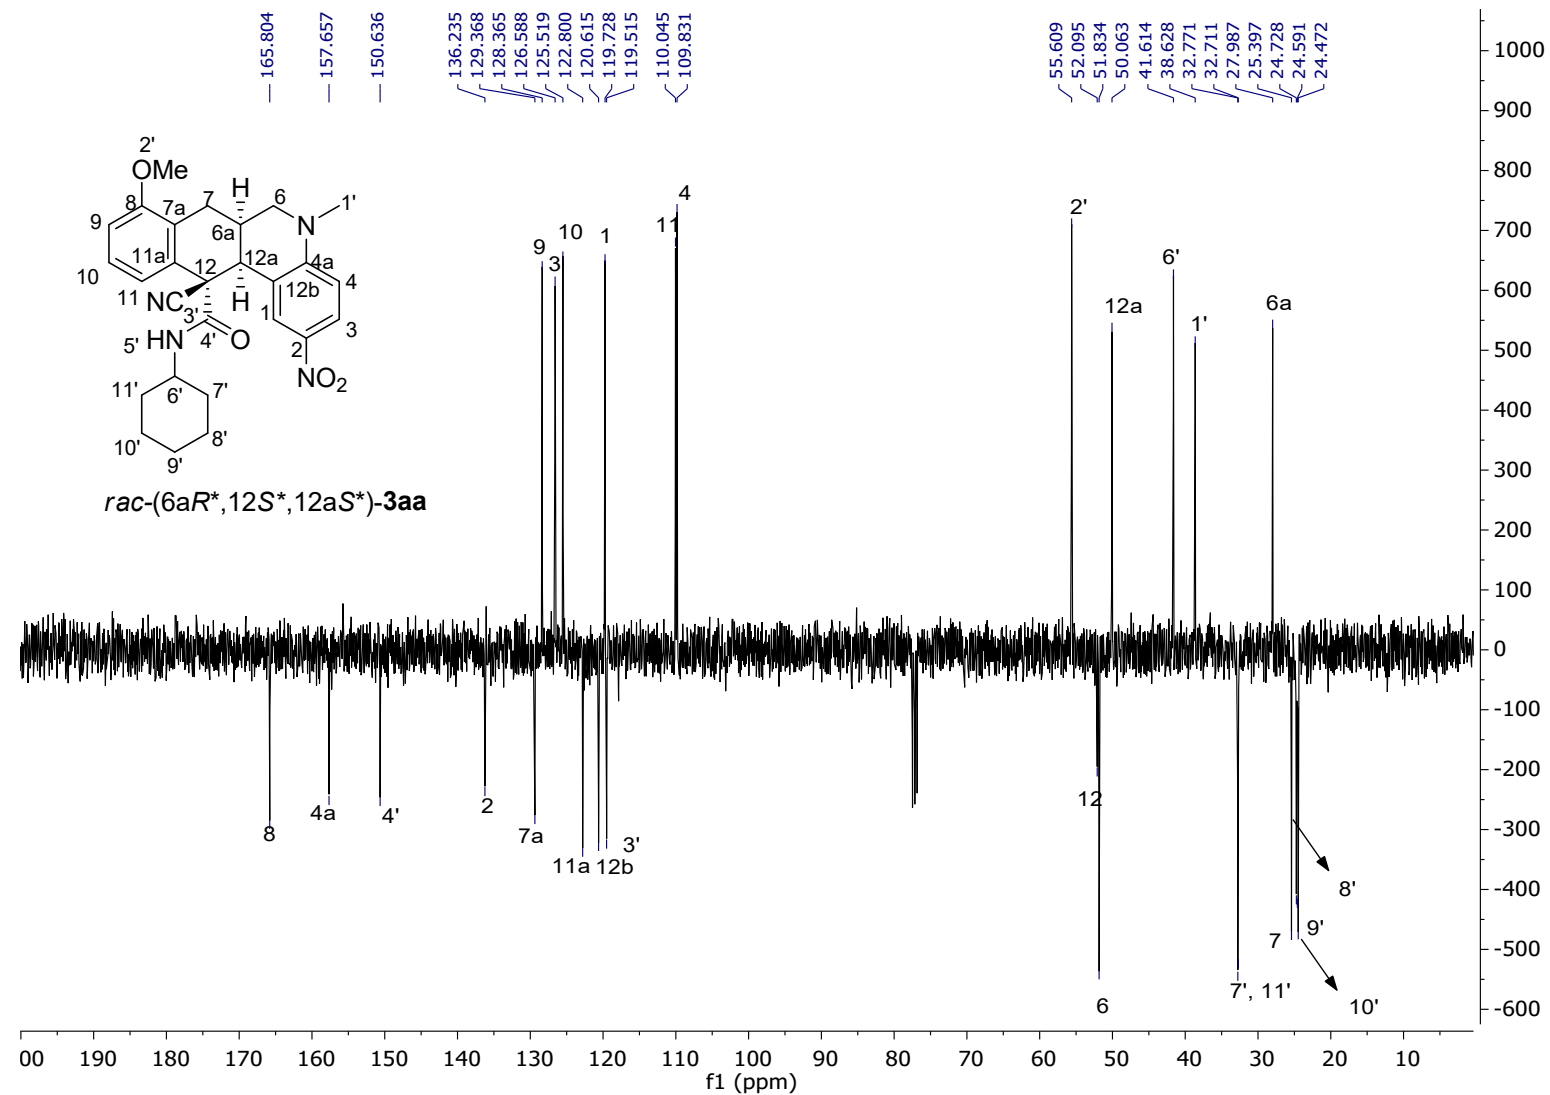

Figure S4. <sup>13</sup>C-NMR spectrum of the *rac*-(6aR\*,12S\*,12aS\*)-**3aa** in CDCl<sub>3</sub> at 100 MHz.

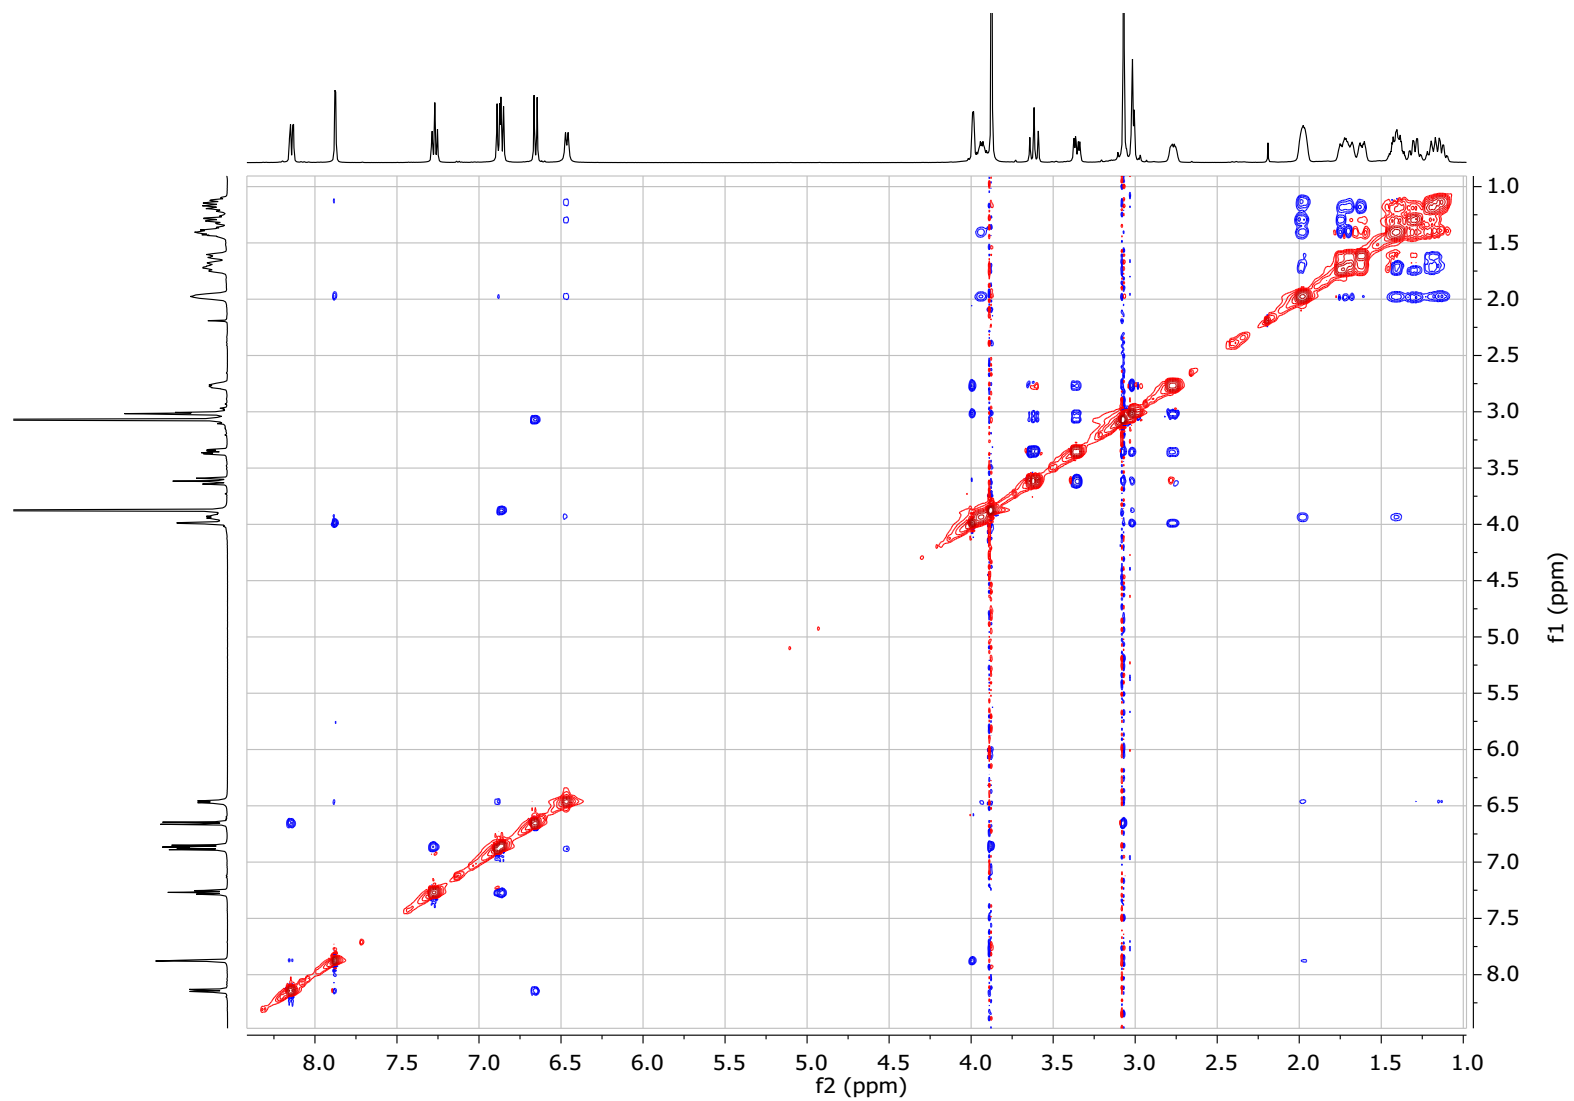

Figure S5. ROESY spectrum of the *rac*-(6aR\*,12S\*,12aS\*)-**3aa** in CDCl<sub>3</sub> at 500 MHz.

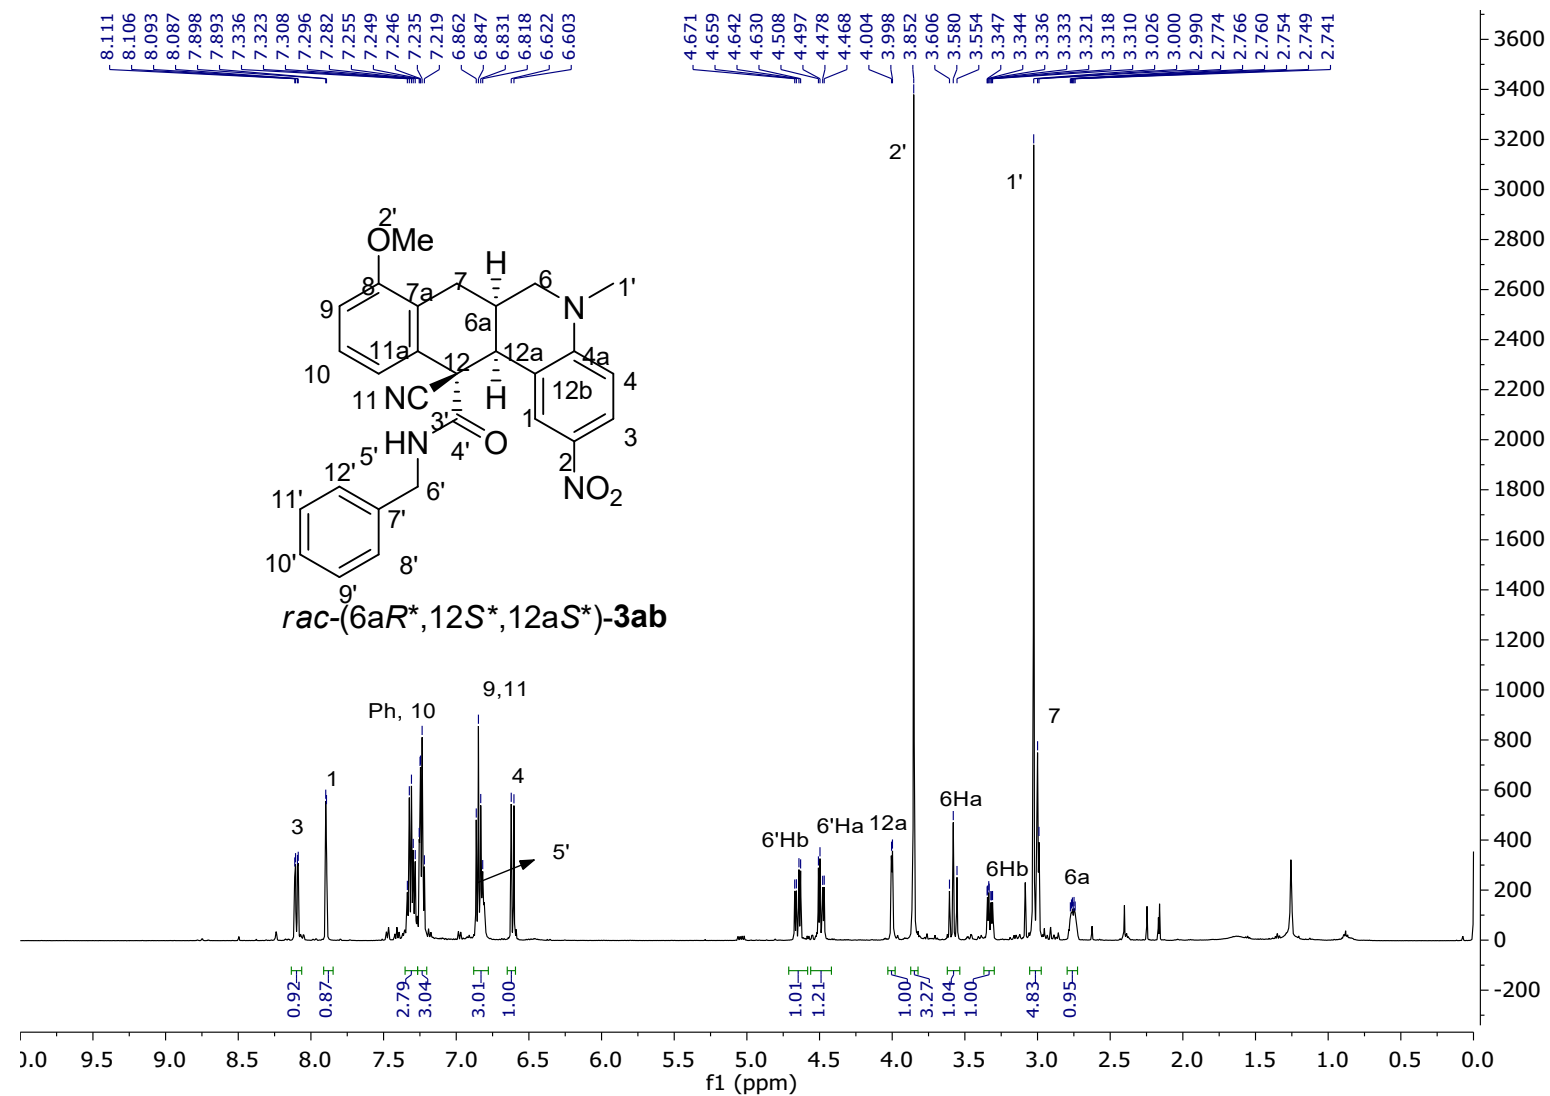

Figure S6. <sup>1</sup>H-NMR spectrum of the *rac*-(6aR\*,12S\*,12aS\*)-3ab in CDCl<sub>3</sub> at 500 MHz.



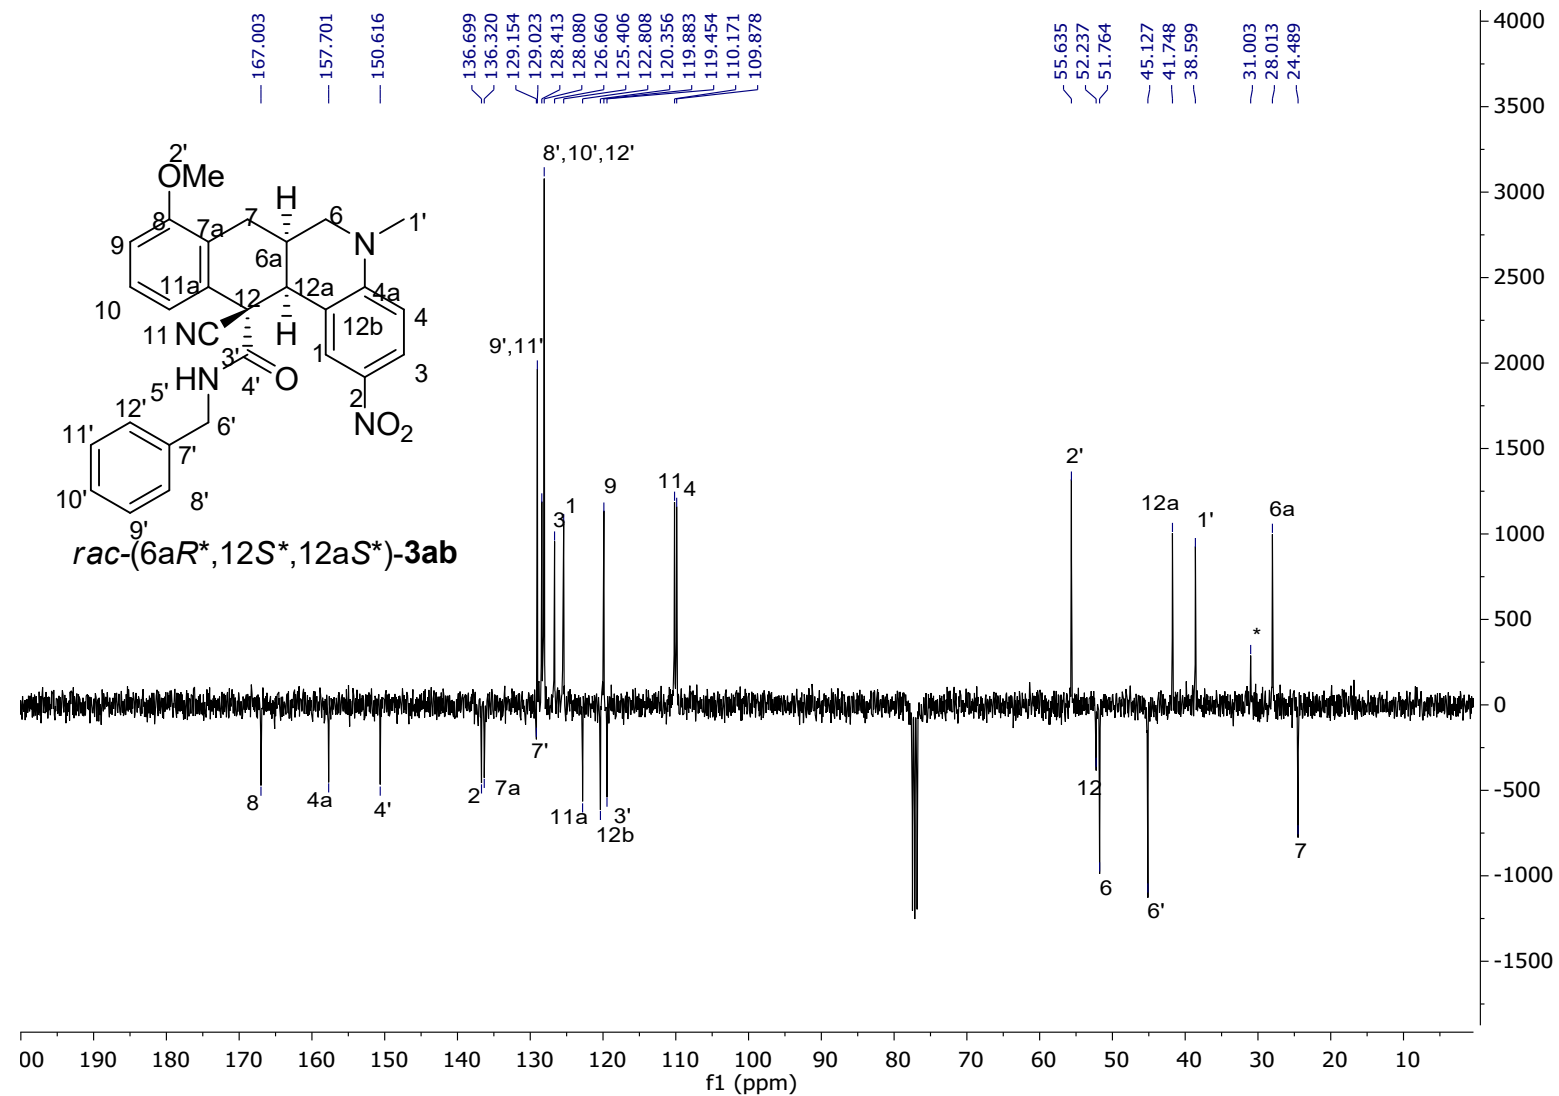

Figure S7. <sup>13</sup>C-NMR spectrum of the *rac*-(6aR\*,12S\*,12aS\*)-3ab in CDCl<sub>3</sub> at 100 MHz.

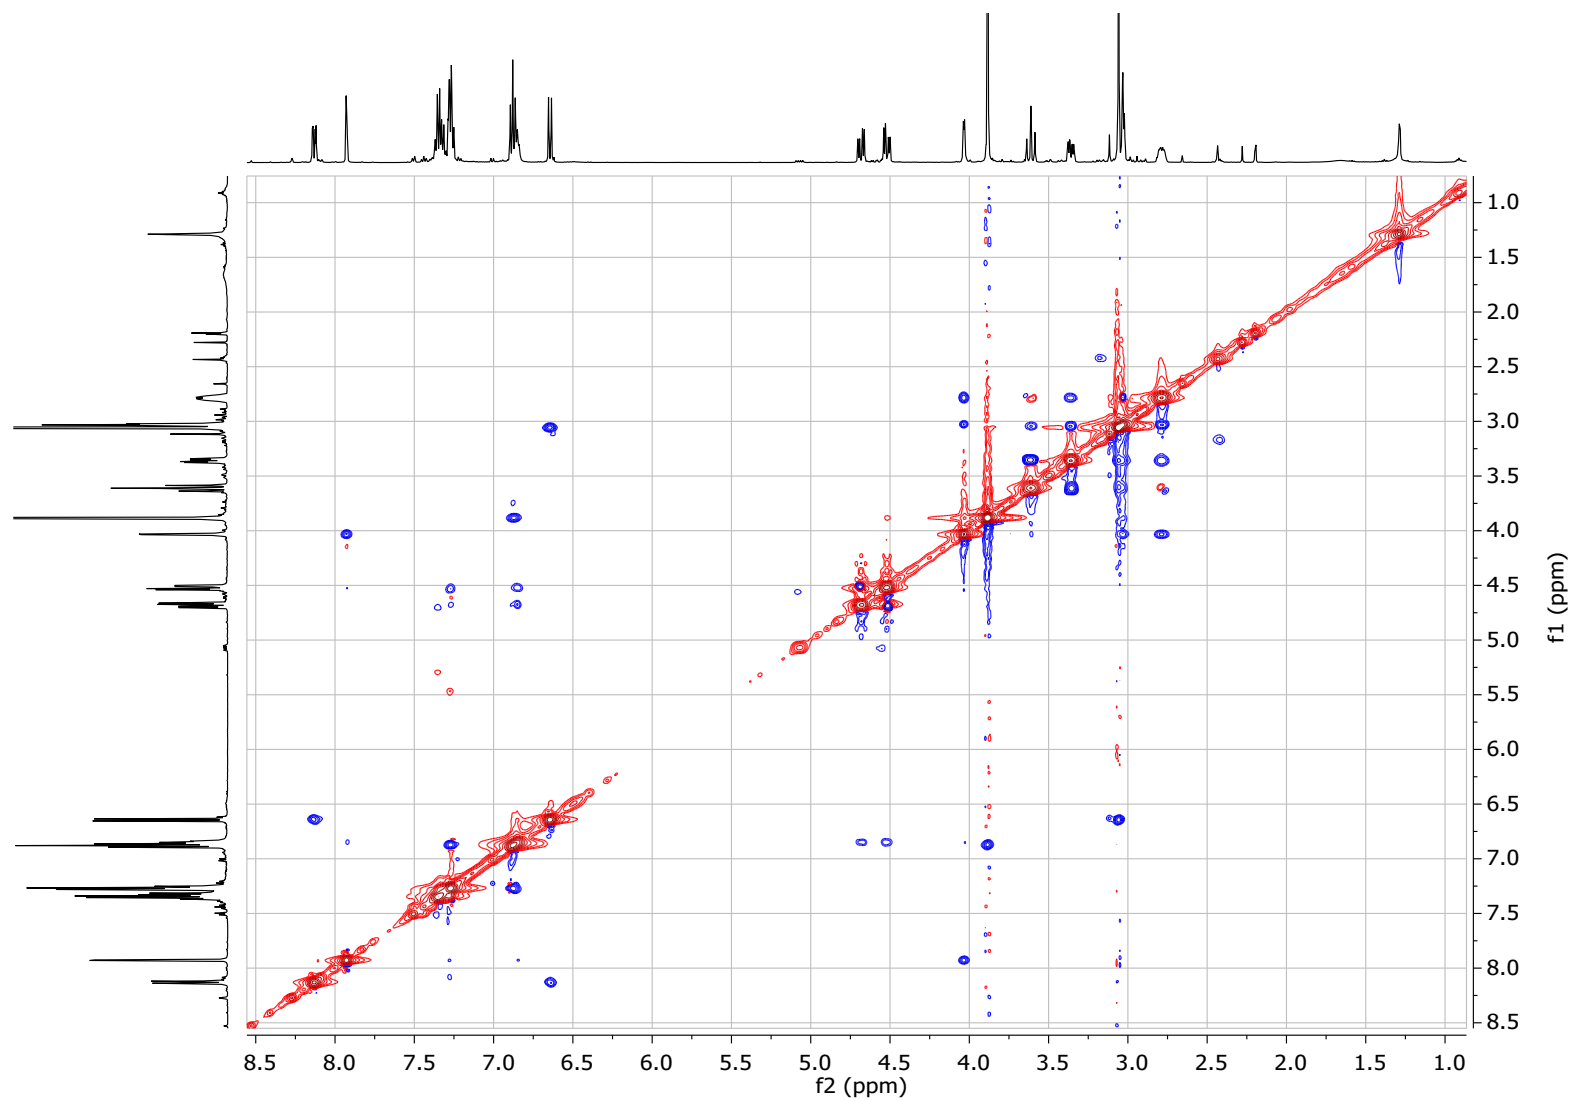

Figure S8. ROESY spectrum of the *rac*-(6aR\*,12S\*,12aS\*)-**3ab** in CDCl<sub>3</sub> at 500 MHz.

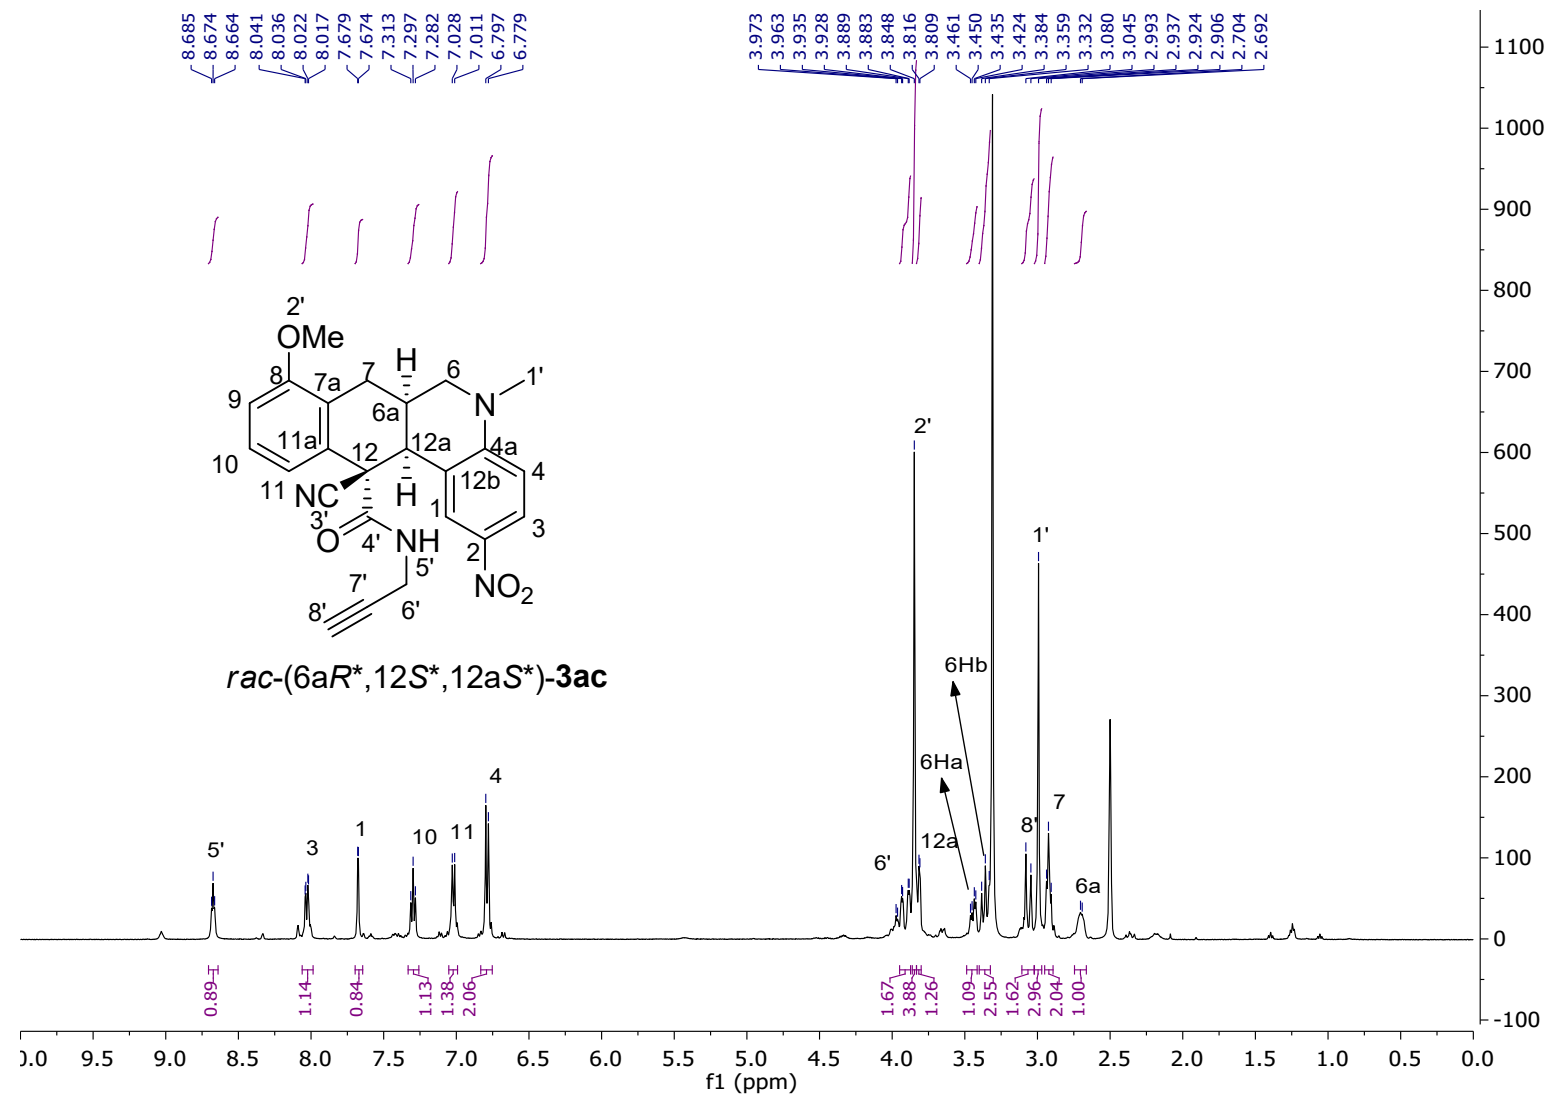

Figure S9. <sup>1</sup>H-NMR spectrum of the *rac*-(6aR\*,12S\*,12aS\*)-3ac in DMSO-d<sub>6</sub> at 500 MHz.

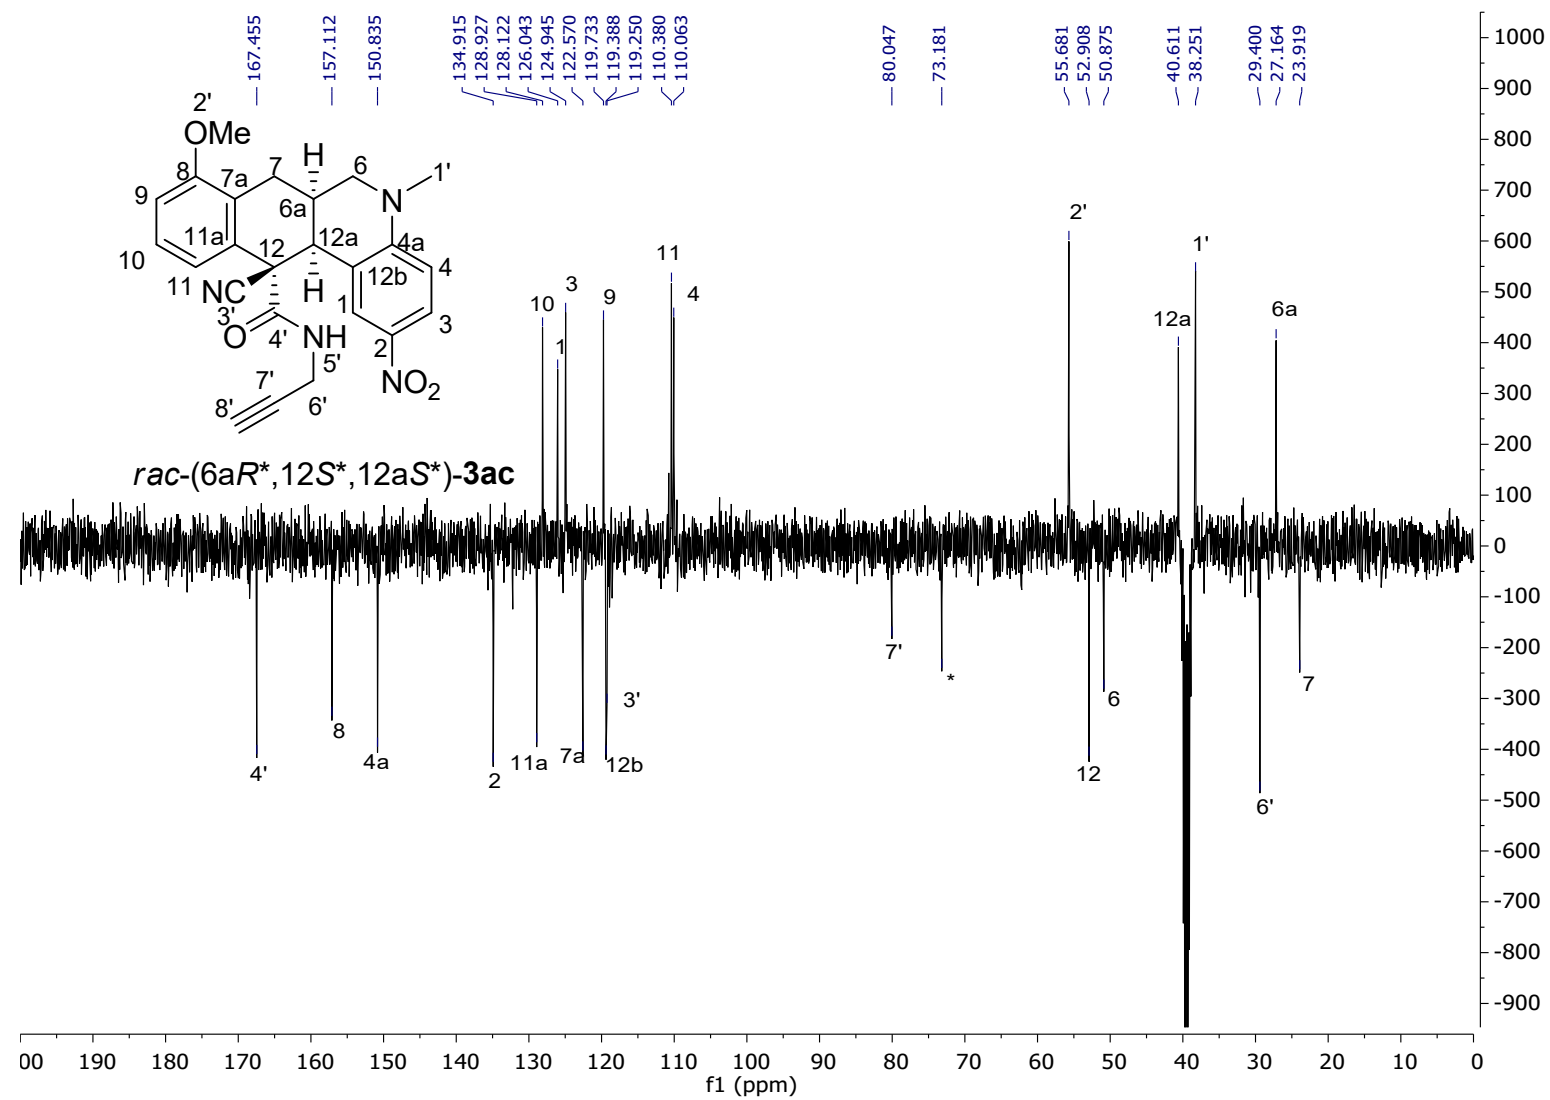

Figure S10. <sup>13</sup>C-NMR spectrum of the *rac*-(6aR\*,12S\*,12aS\*)-3ac in DMSO-d<sub>6</sub> at 125 MHz.

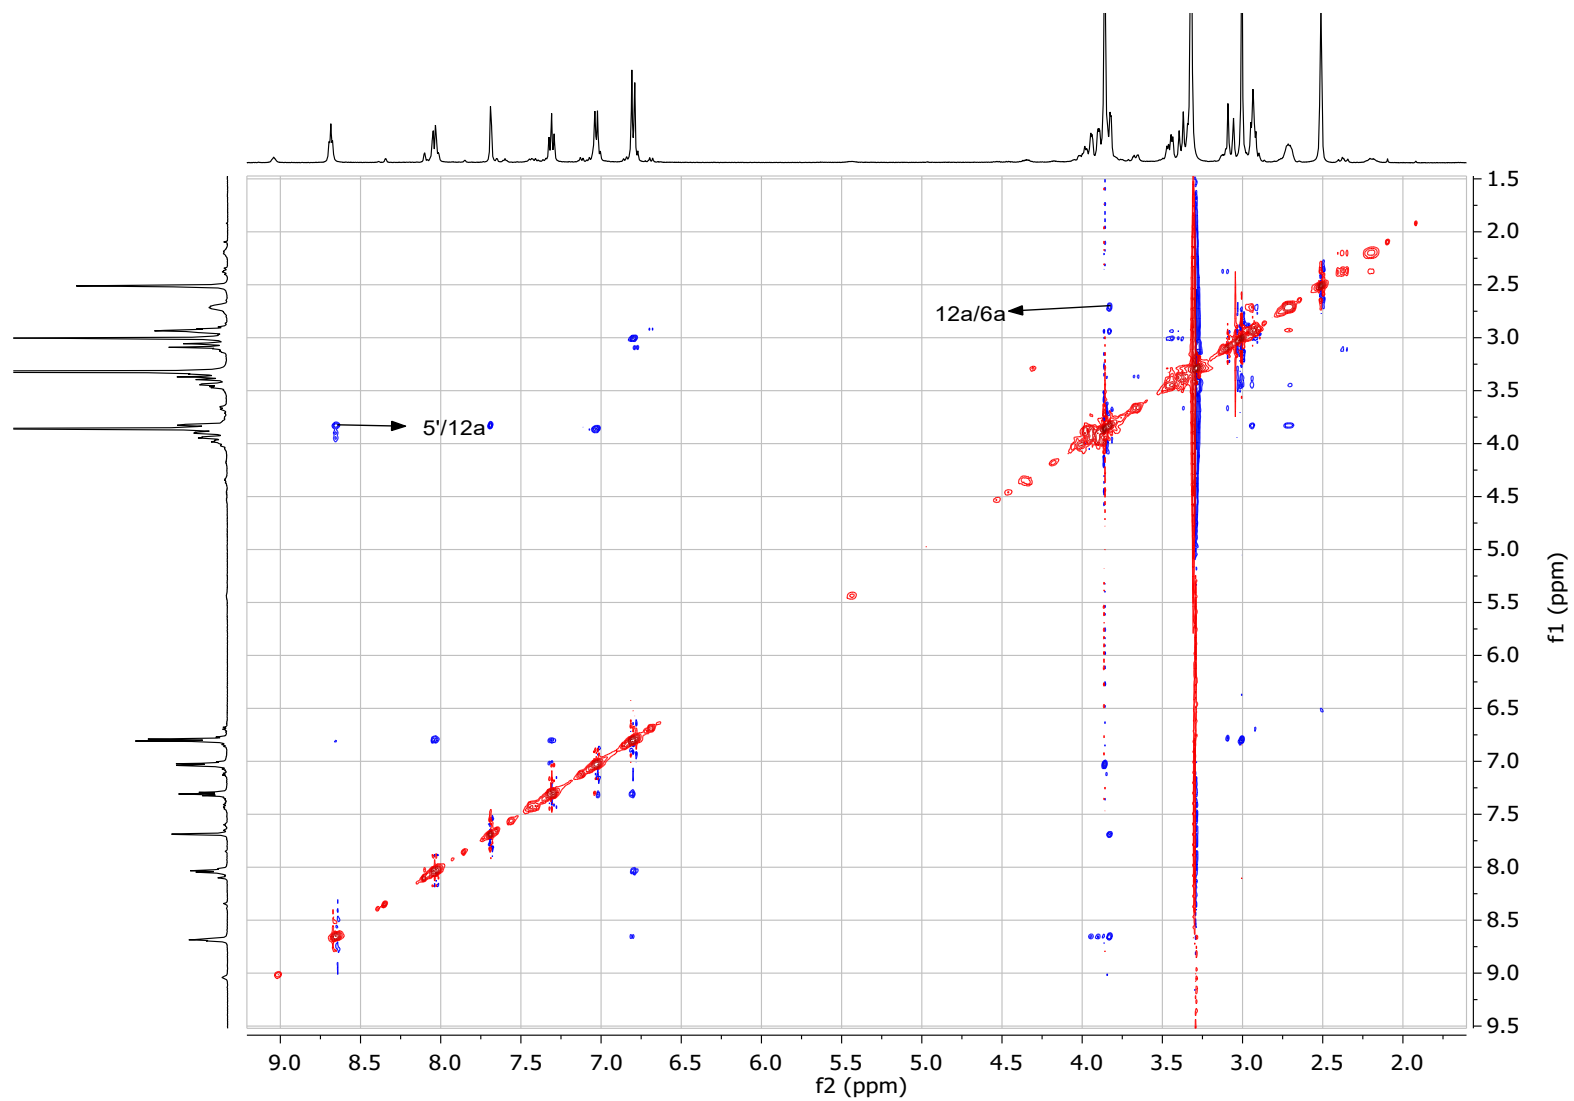

Figure S11. ROESY spectrum of the *rac*-(6aR\*,12S\*,12aS\*)-3ac in DMSO-d<sub>6</sub> at 500 MHz.

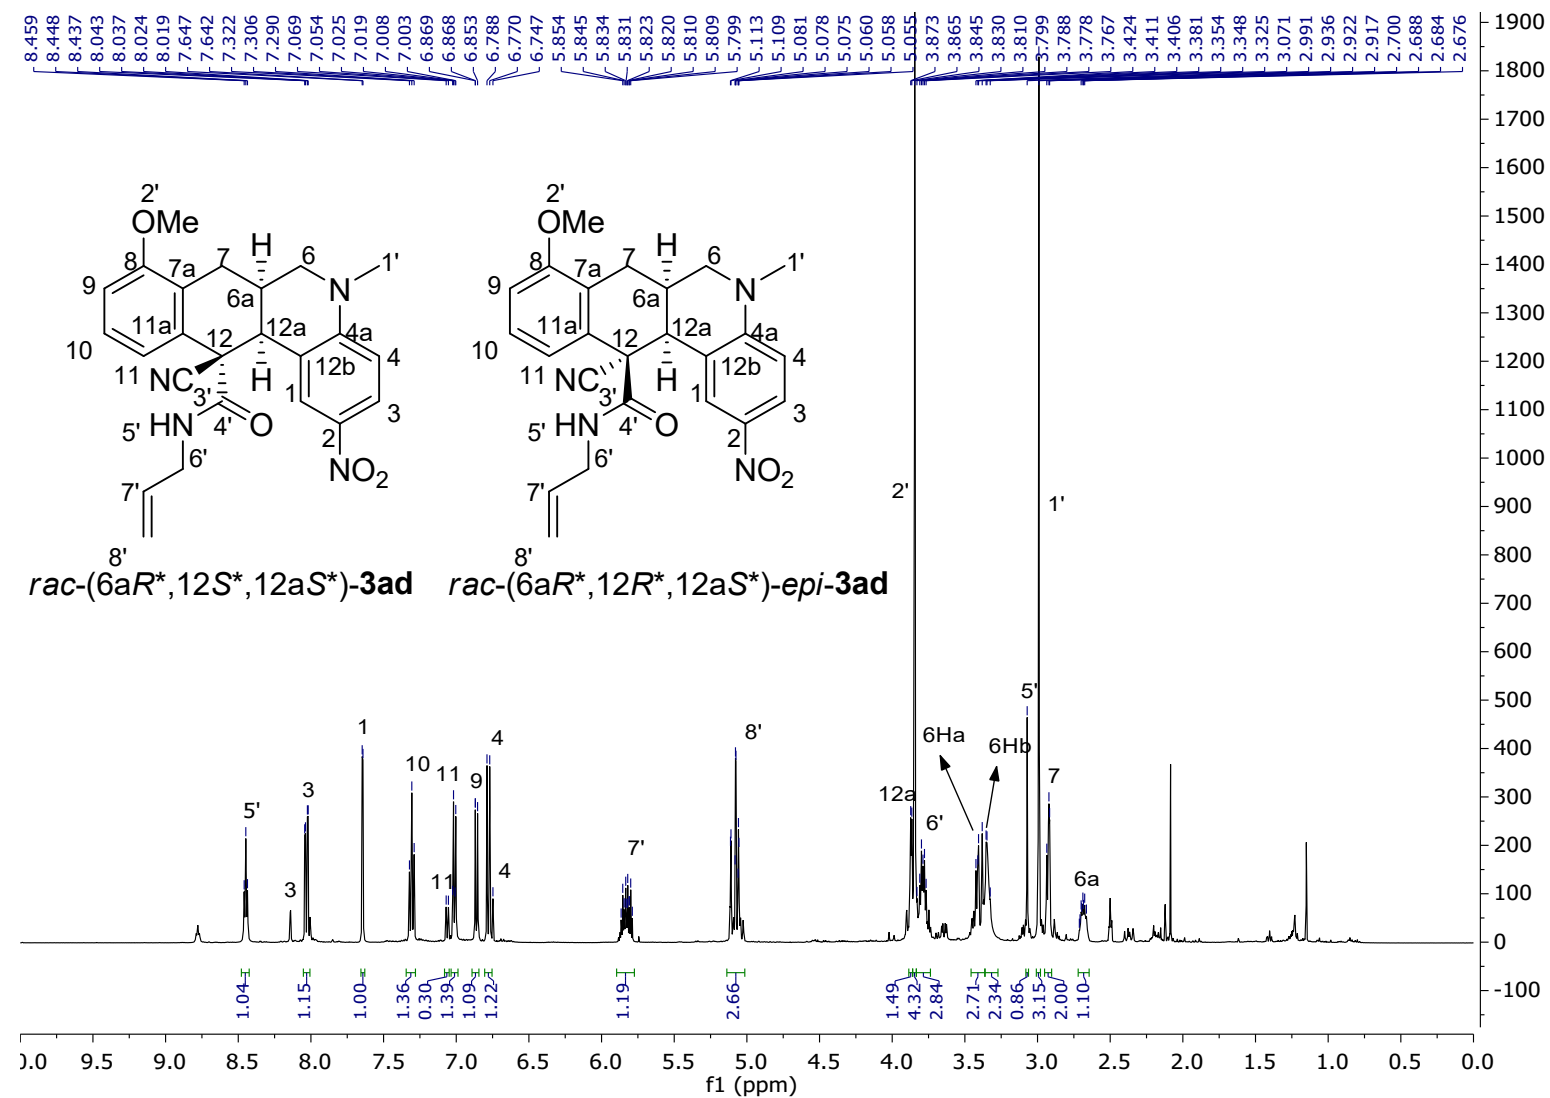

Figure S12. <sup>1</sup>H-NMR spectrum of the *rac*-(6aR\*,12S\*,12aS\*)-3ad and *rac*-(6aR\*,12R\*,12aS\*)-epi-3ad in DMSO-d<sub>6</sub> at 500 MHz.

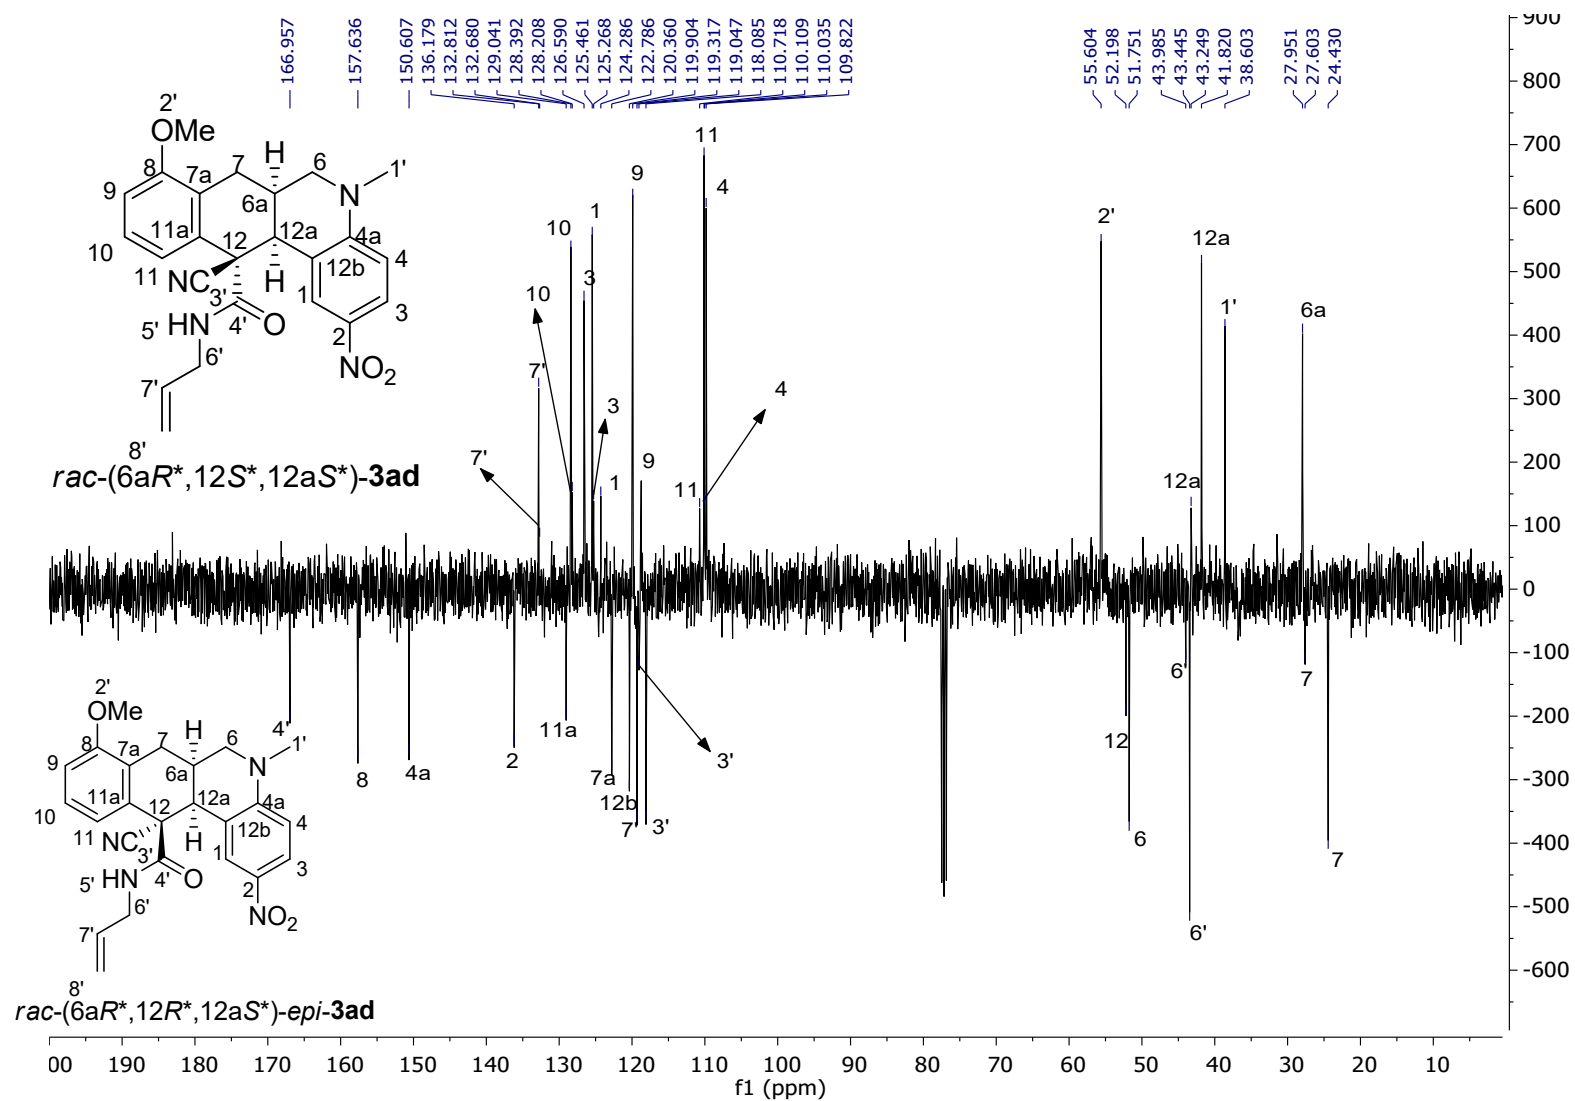

Figure S13. <sup>13</sup>C-NMR spectrum of *rac*-(6aR\*,12S\*,12aS\*)-3ag and *rac*-(6aR\*,12R\*,12aS\*)-epi-3ag in CDCl<sub>3</sub> at 100 MHz.

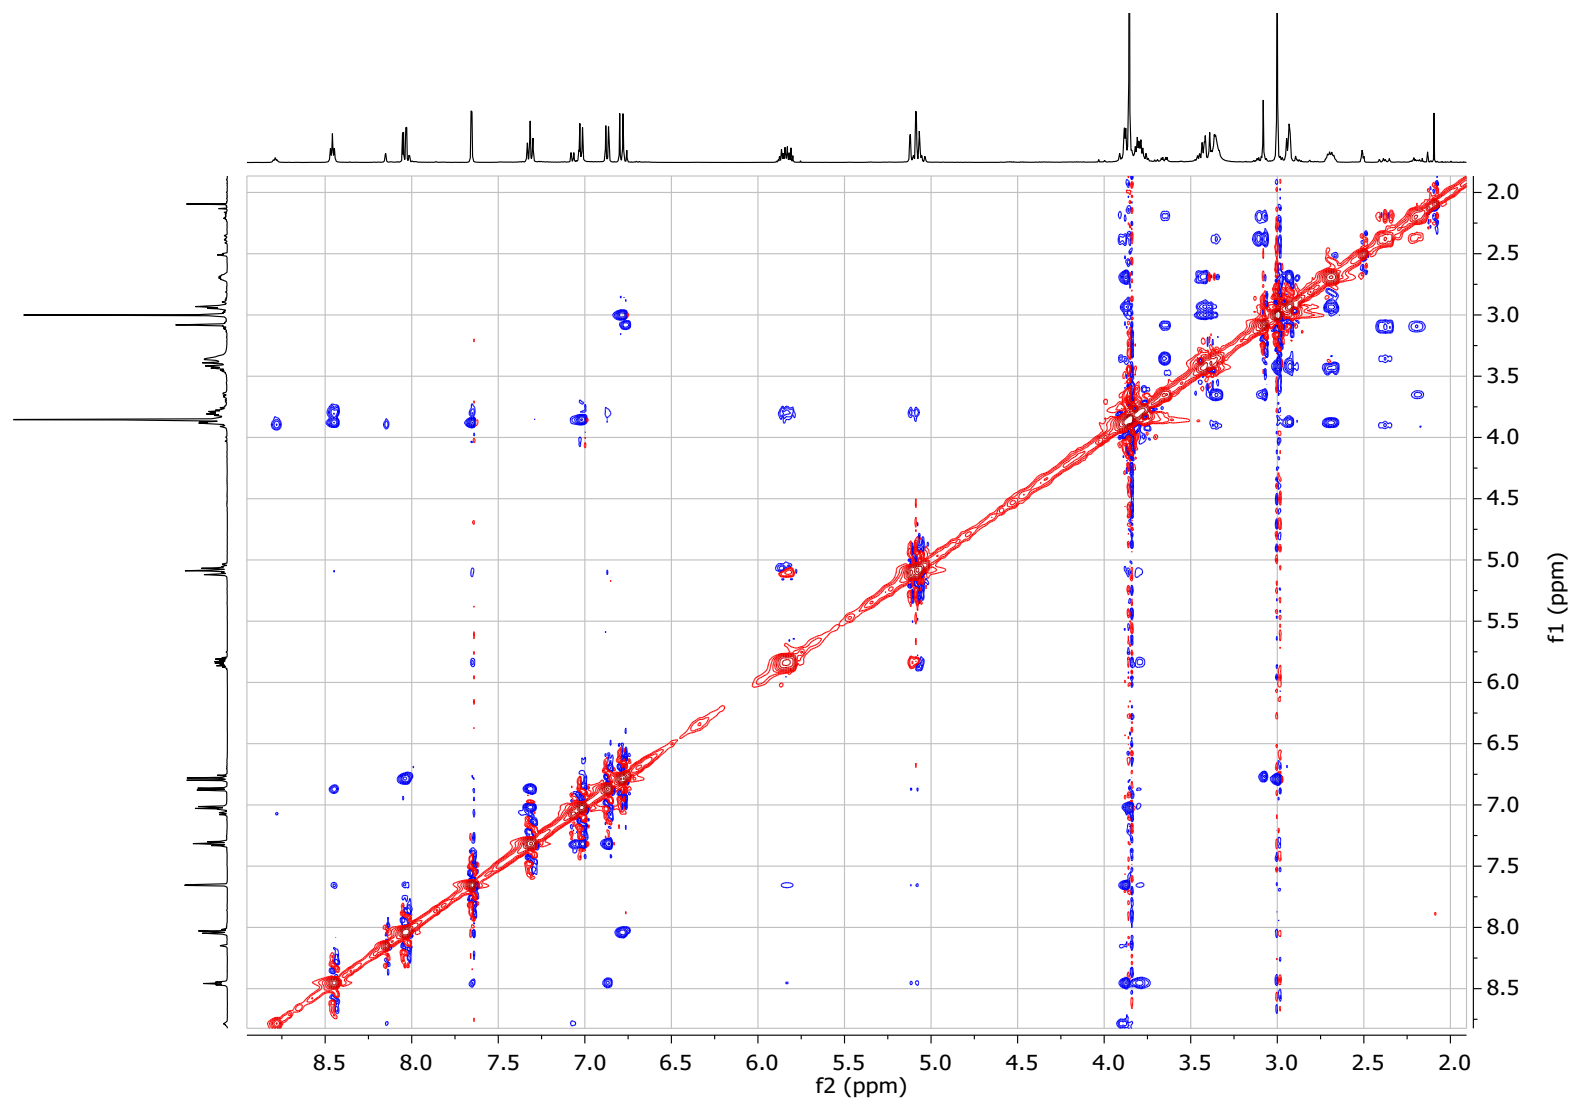

Figure S14. ROESY spectrum of the *rac*-(6a*R*<sup>\*</sup>,12*S*<sup>\*</sup>,12a*S*<sup>\*</sup>)-**3ad** and *rac*-(6a*R*<sup>\*</sup>,12*R*<sup>\*</sup>,12a*S*<sup>\*</sup>)-*epi*-**3ad** in DMSO-*d*<sub>6</sub> at 500 MHz.



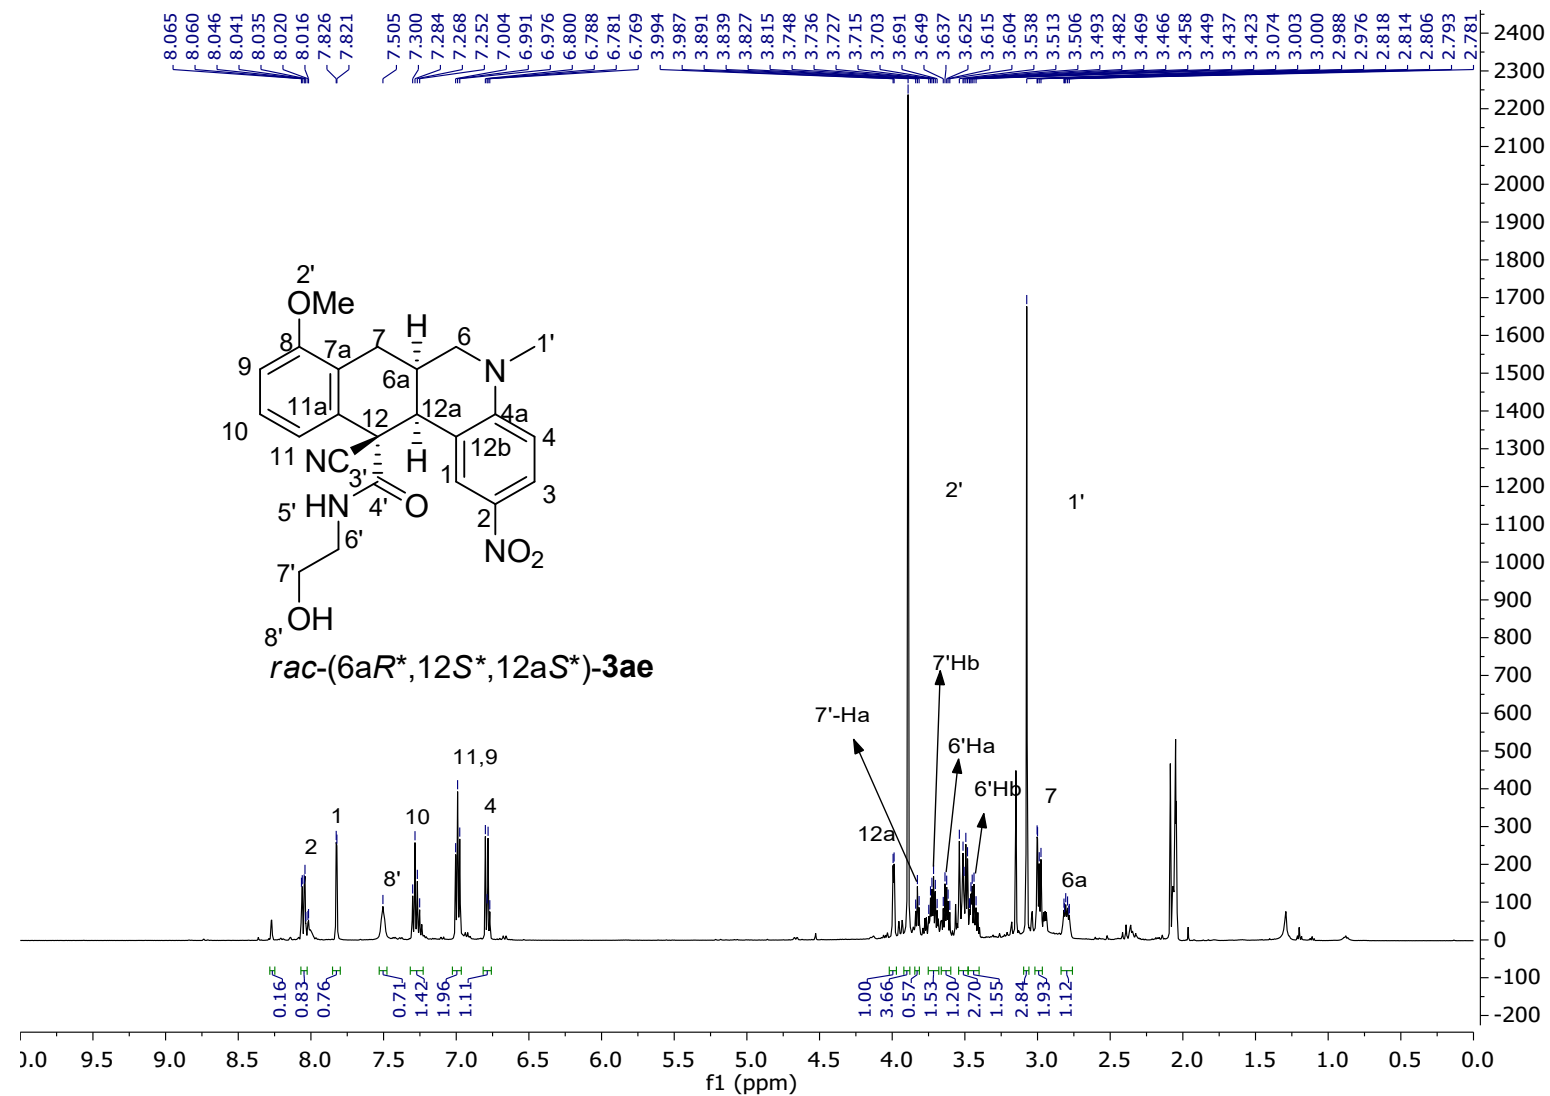

Figure S15. <sup>1</sup>H-NMR spectrum of the *rac*-(6aR\*,12S\*,12aS\*)-3ae in acetone-d<sub>6</sub> at 500 MHz.

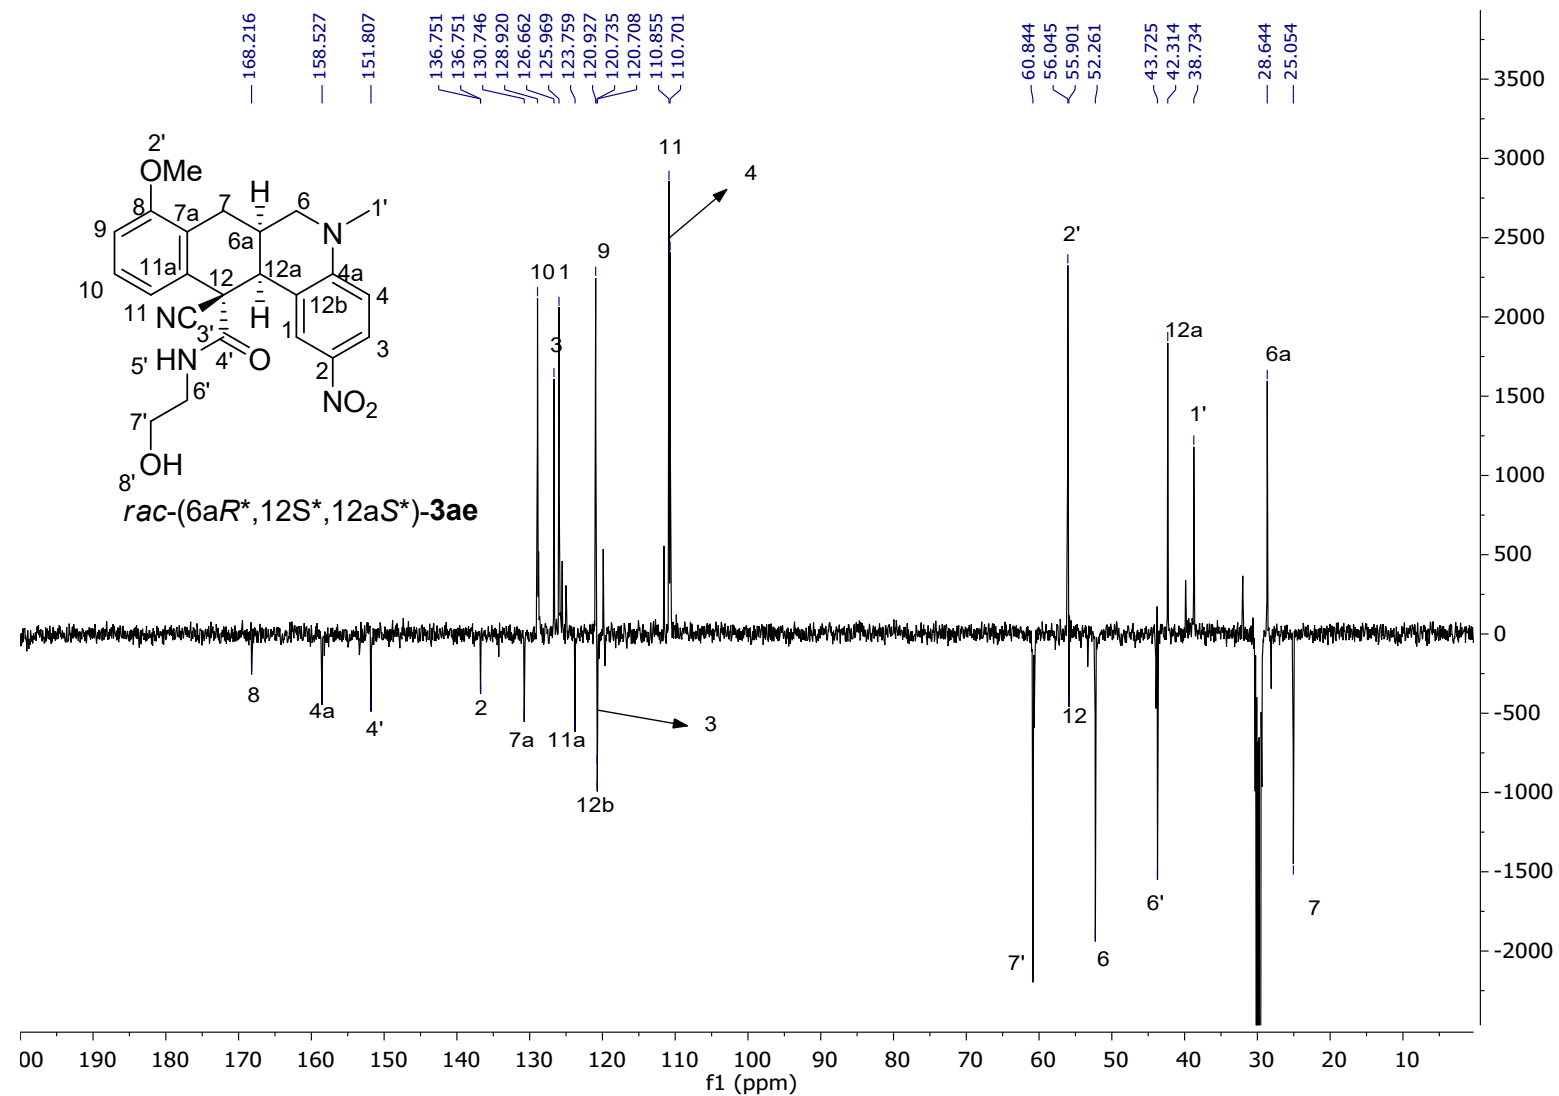

Figure S16. <sup>13</sup>C-NMR spectrum of the *rac*-(6aR\*,12S\*,12aS\*)-3ae in acetone-d<sub>6</sub> at 125 MHz.

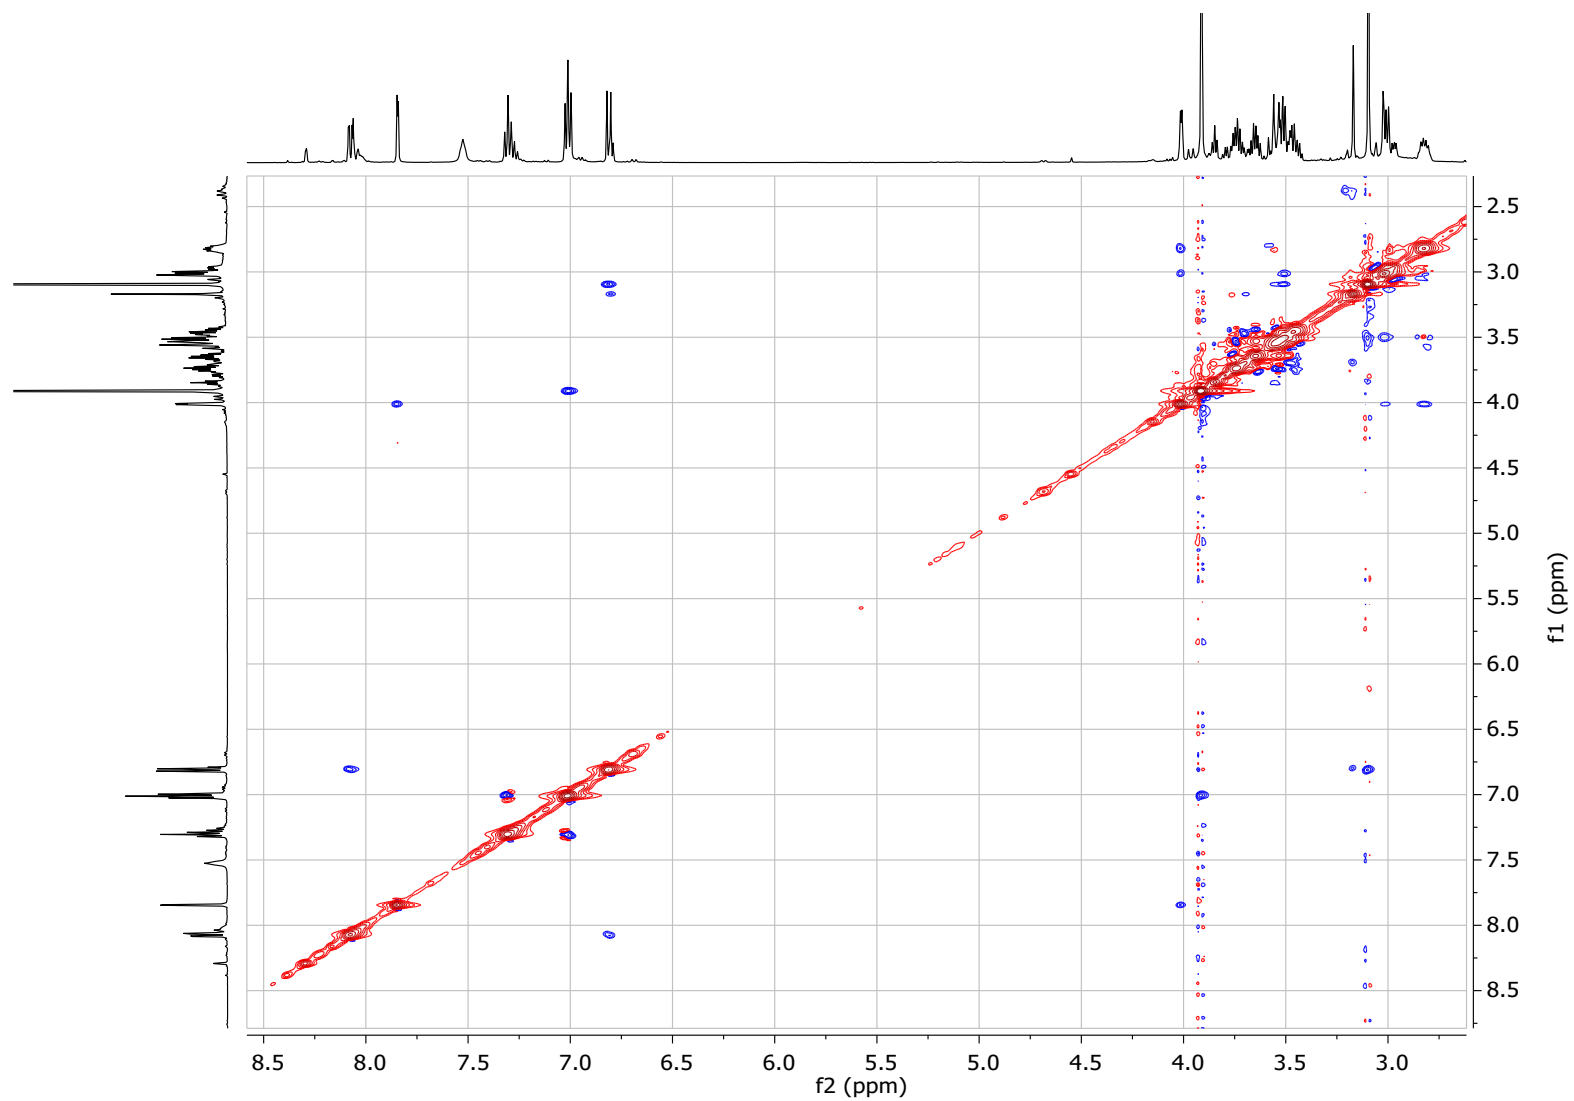

Figure S17. ROESY spectrum of the *rac*-(6a*R*<sup>\*</sup>,12*S*<sup>\*</sup>,12a*S*<sup>\*</sup>)-**3ae** in acetone-*d*<sub>6</sub> at 500 MHz.

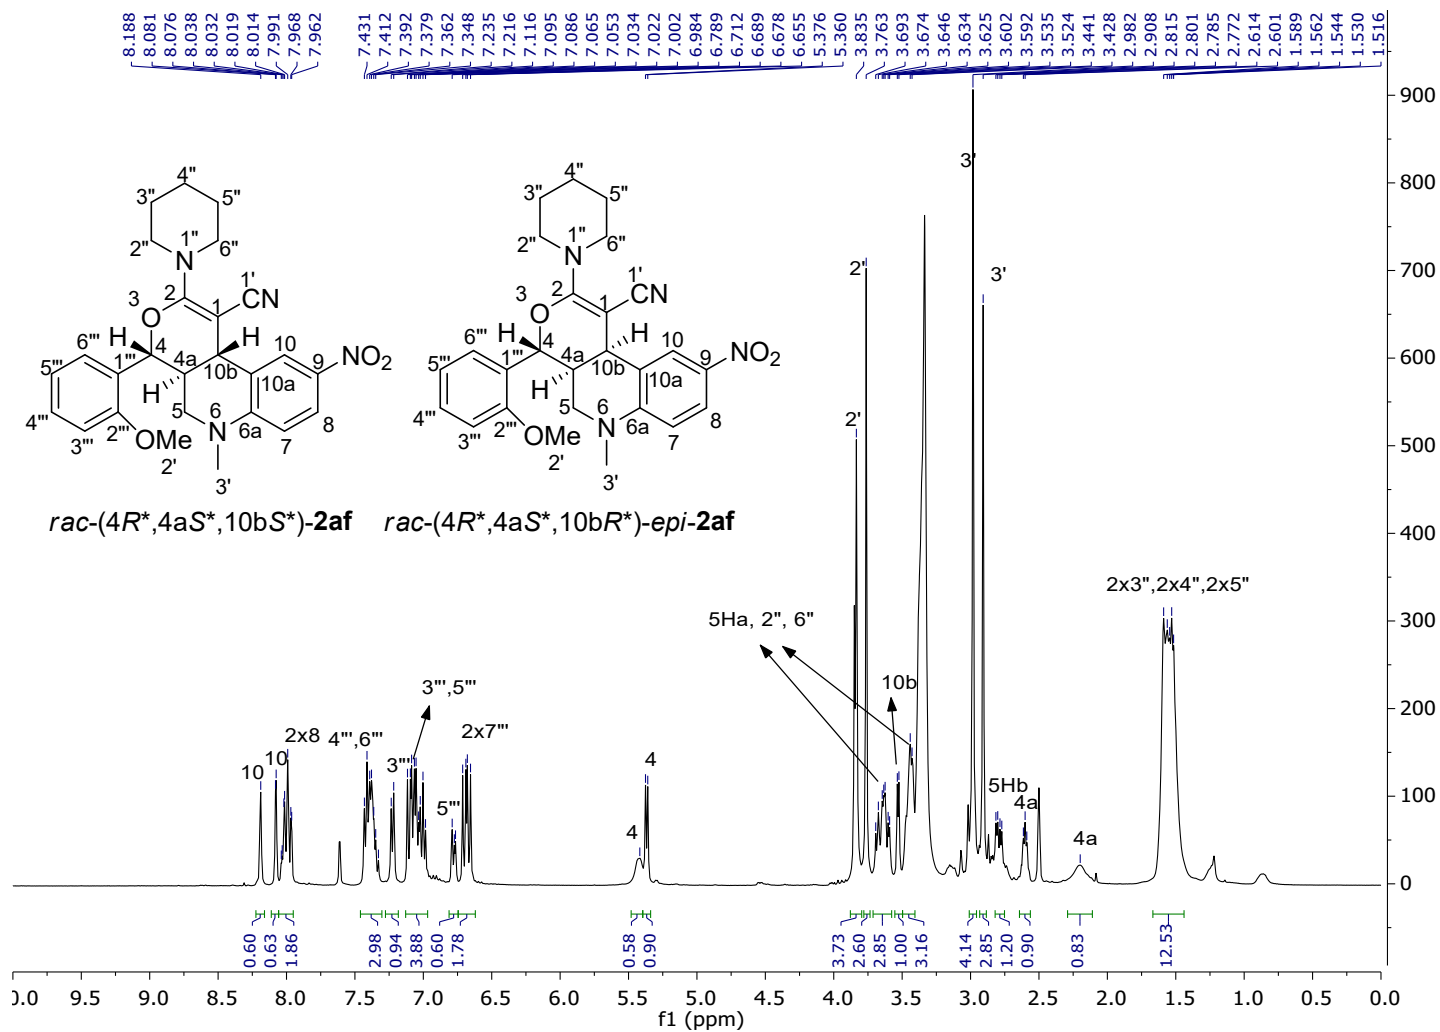

Figure S18.  $^1\text{H-NMR}$  spectrum of the *rac*-(4R\*,4aS\*,10bS\*)-2af and *rac*-(4R\*,4aS\*,10bR\*)-epi-2af in DMSO- $d_6$  at 400 MHz.

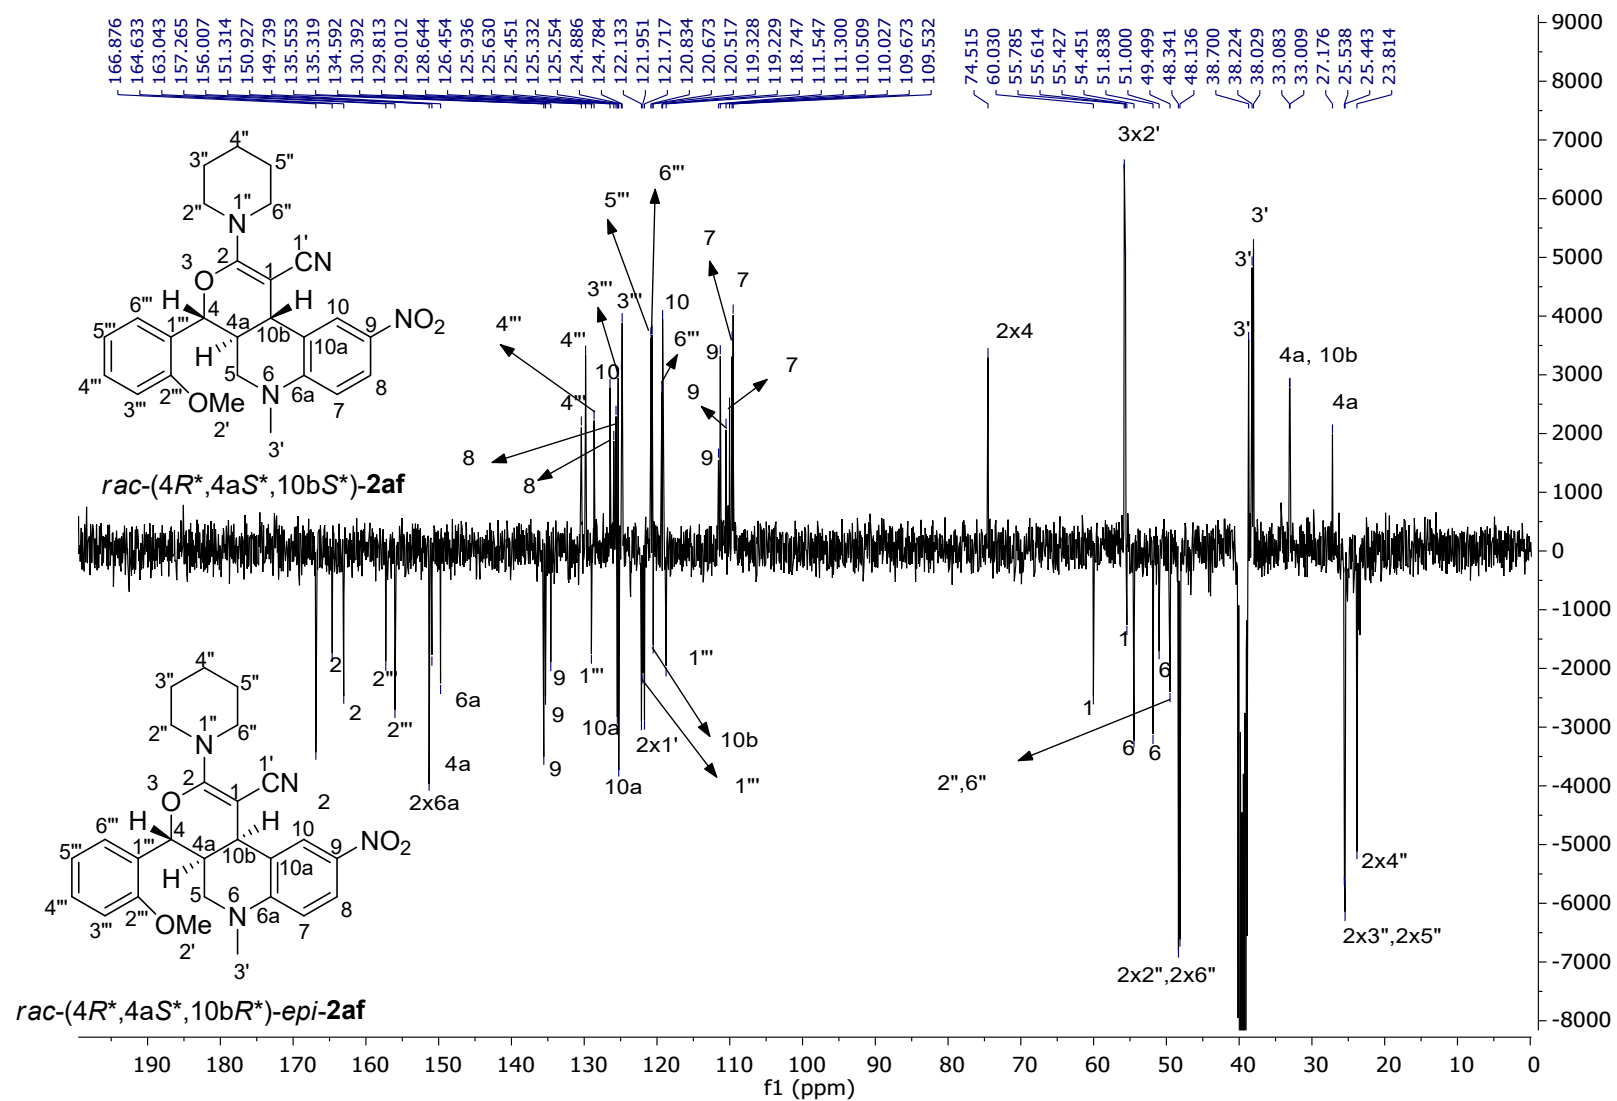

Figure S19. <sup>13</sup>C-NMR spectrum of the *rac*-(4*R*<sup>\*</sup>,4*a*S<sup>\*</sup>,10*b*S<sup>\*</sup>)-**2af** and *rac*-(4*R*<sup>\*</sup>,4*a*S<sup>\*</sup>,10*b*R<sup>\*</sup>)-*epi*-**2af** in DMSO-d<sub>6</sub> at 100 MHz.

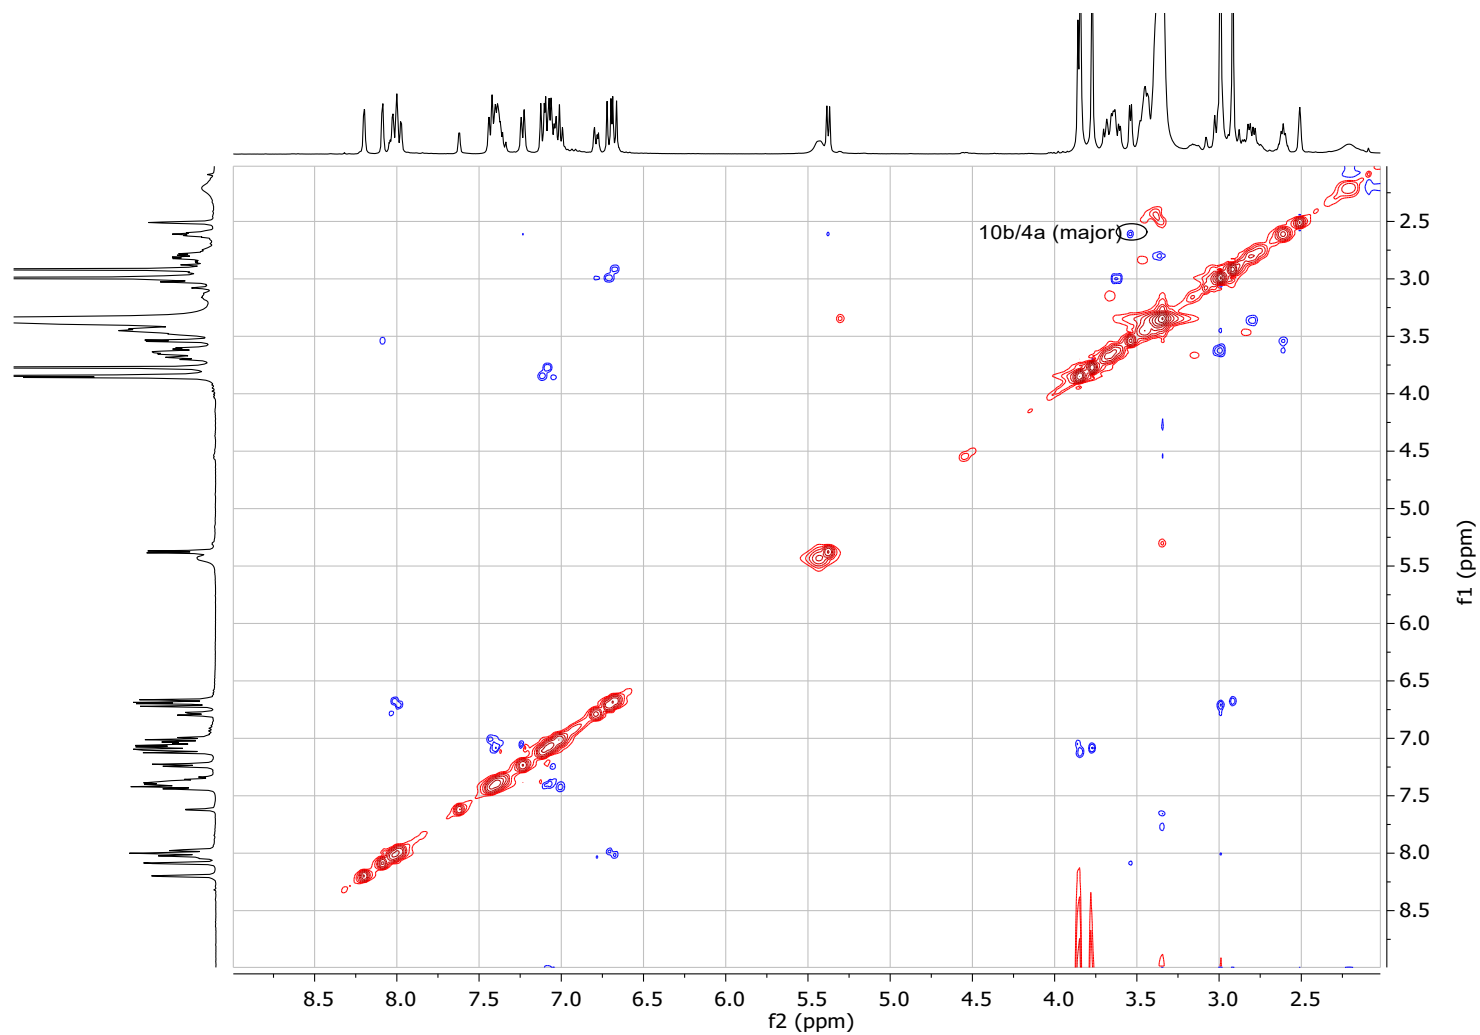

Figure S20. NOESY spectrum of the *rac*-(4*R*<sup>\*</sup>,4*aS*<sup>\*</sup>,10*bS*<sup>\*</sup>)-**2af** and *rac*-(4*R*<sup>\*</sup>,4*aS*<sup>\*</sup>,10*bR*<sup>\*</sup>)-*epi*-**2af** in DMSO-*d*<sub>6</sub> at 400 MHz

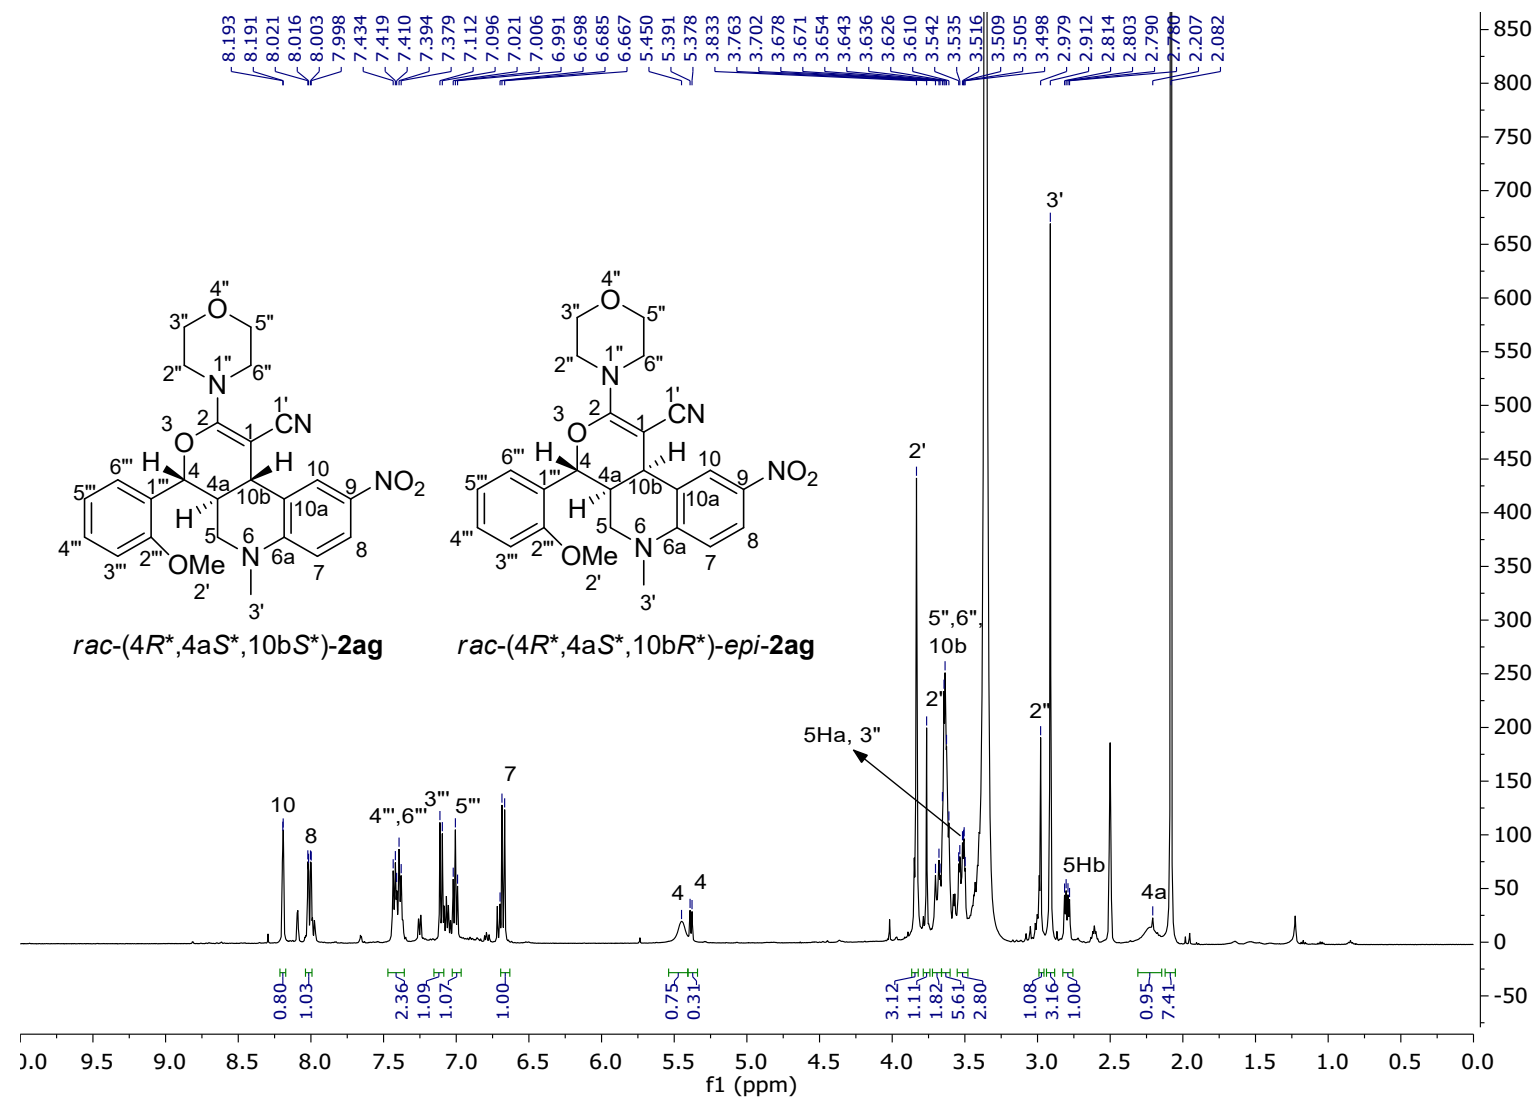

Figure S21. <sup>1</sup>H-NMR spectrum of the *rac*-(4*R*<sup>\*</sup>,4*aS*<sup>\*</sup>,10*bS*<sup>\*</sup>)-**2ag** and *rac*-(4*R*<sup>\*</sup>,4*aS*<sup>\*</sup>,10*bR*<sup>\*</sup>)-*epi*-**2ag** in DMSO-*d*<sub>6</sub> at 500 MHz.

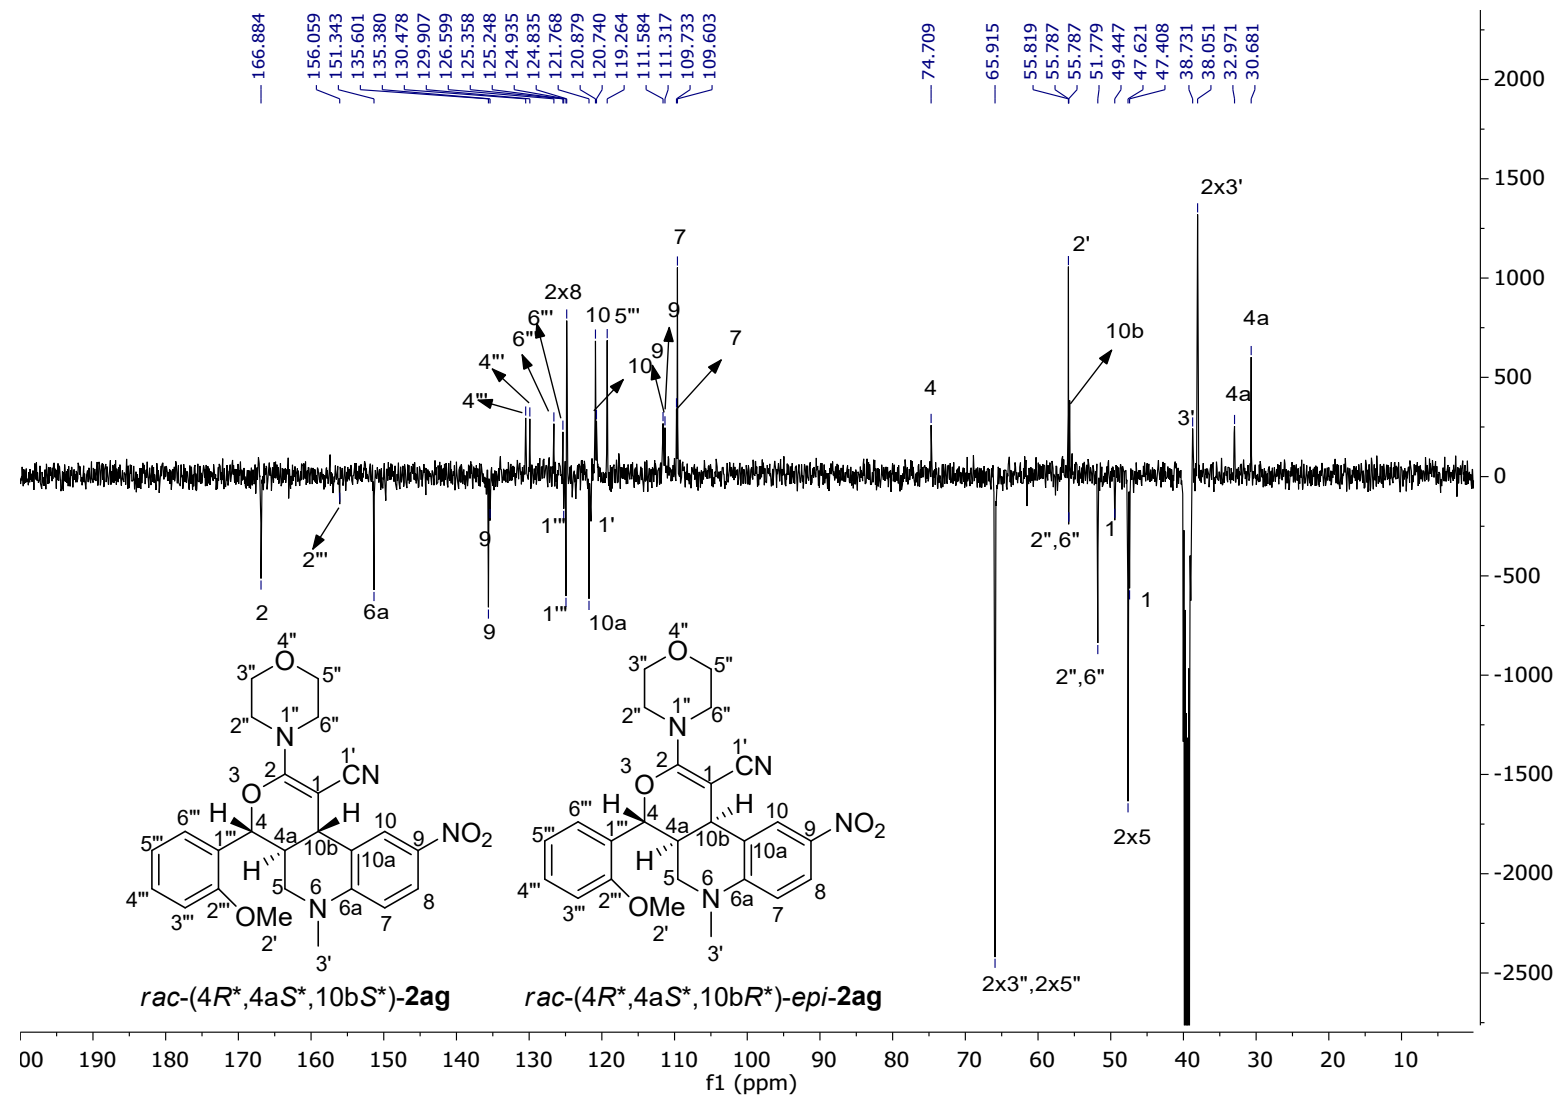

Figure S22.  $^{13}\text{C}$ -NMR spectrum of the *rac*-(4*R*\*,4*a*S\*,10*b*S\*)-**2ag** and *rac*-(4*R*\*,4*a*S\*,10*b*R\*)-*epi*-**2ag** in DMSO- $\text{d}_6$  at 125 MHz.



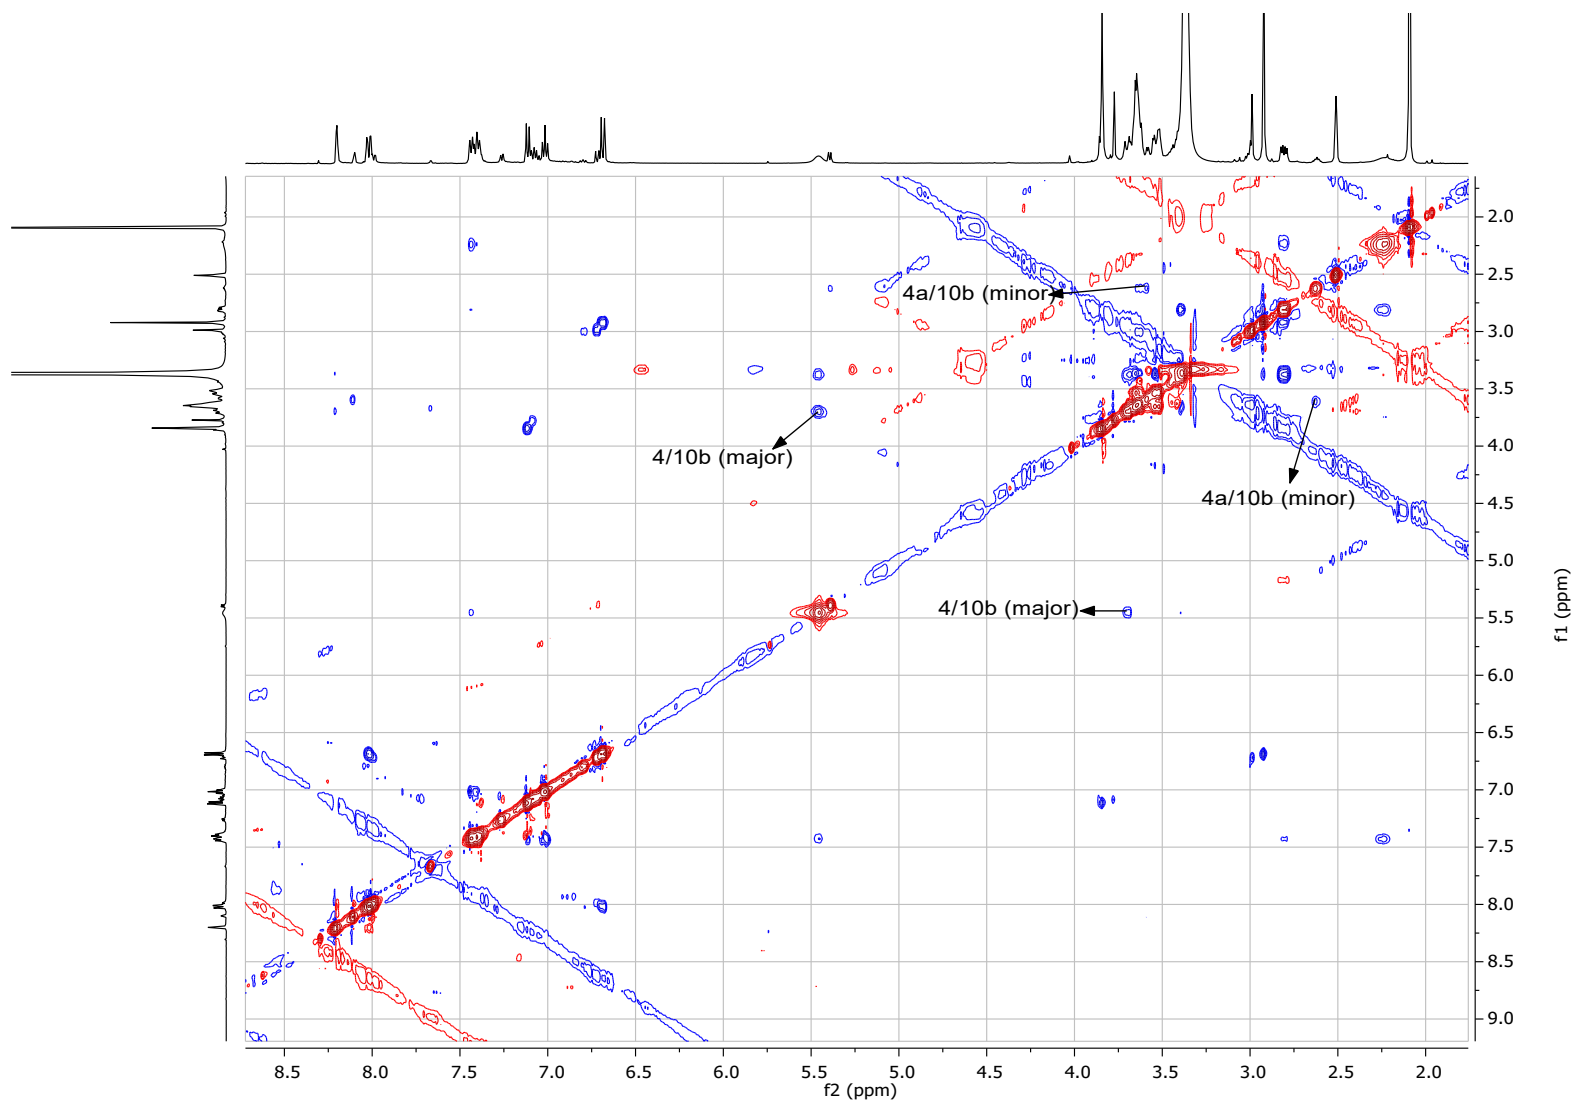

Figure S23. ROESY spectrum of the *rac*-(4*R*<sup>\*</sup>,4*a**S*<sup>\*</sup>,10*b**S*<sup>\*</sup>)-**2ag** and *rac*-(4*R*<sup>\*</sup>,4*a**S*<sup>\*</sup>,10*b**R*<sup>\*</sup>)-*epi*-**2ag** in DMSO-*d*<sub>6</sub> at 500 MHz.

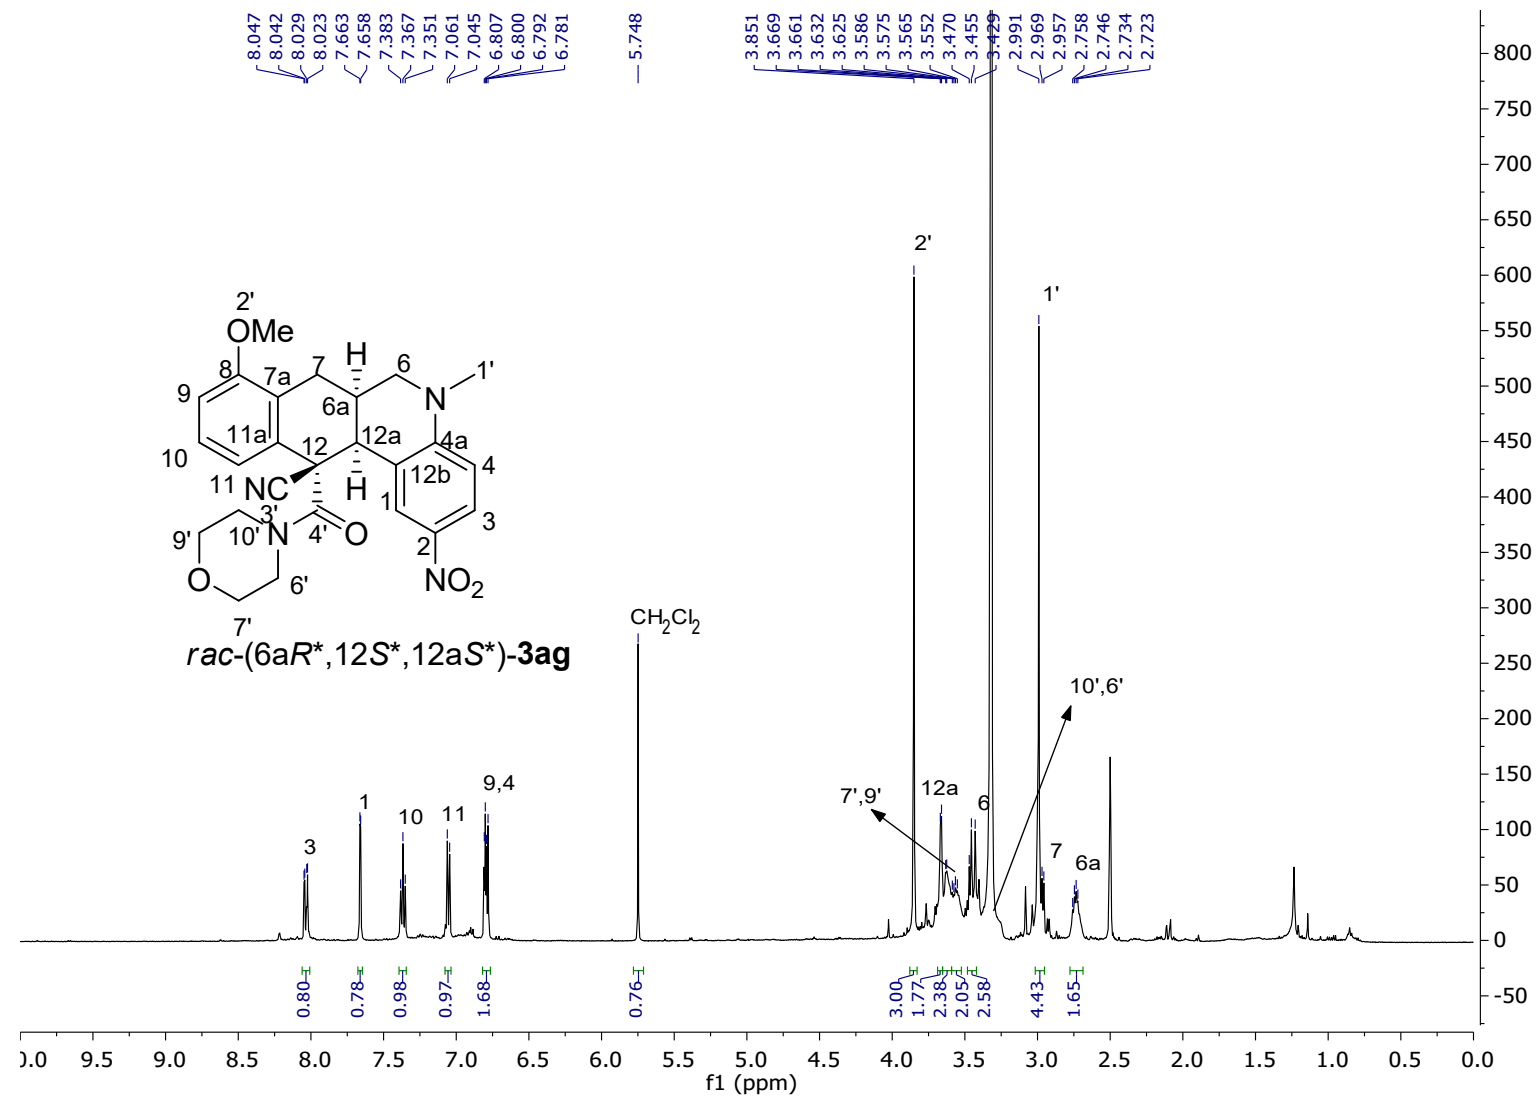

Figure S24. <sup>1</sup>H-NMR spectrum of the *rac*-(6aR\*,12S\*,12aS\*)-3ag in DMSO-d<sub>6</sub> at 500 MHz.

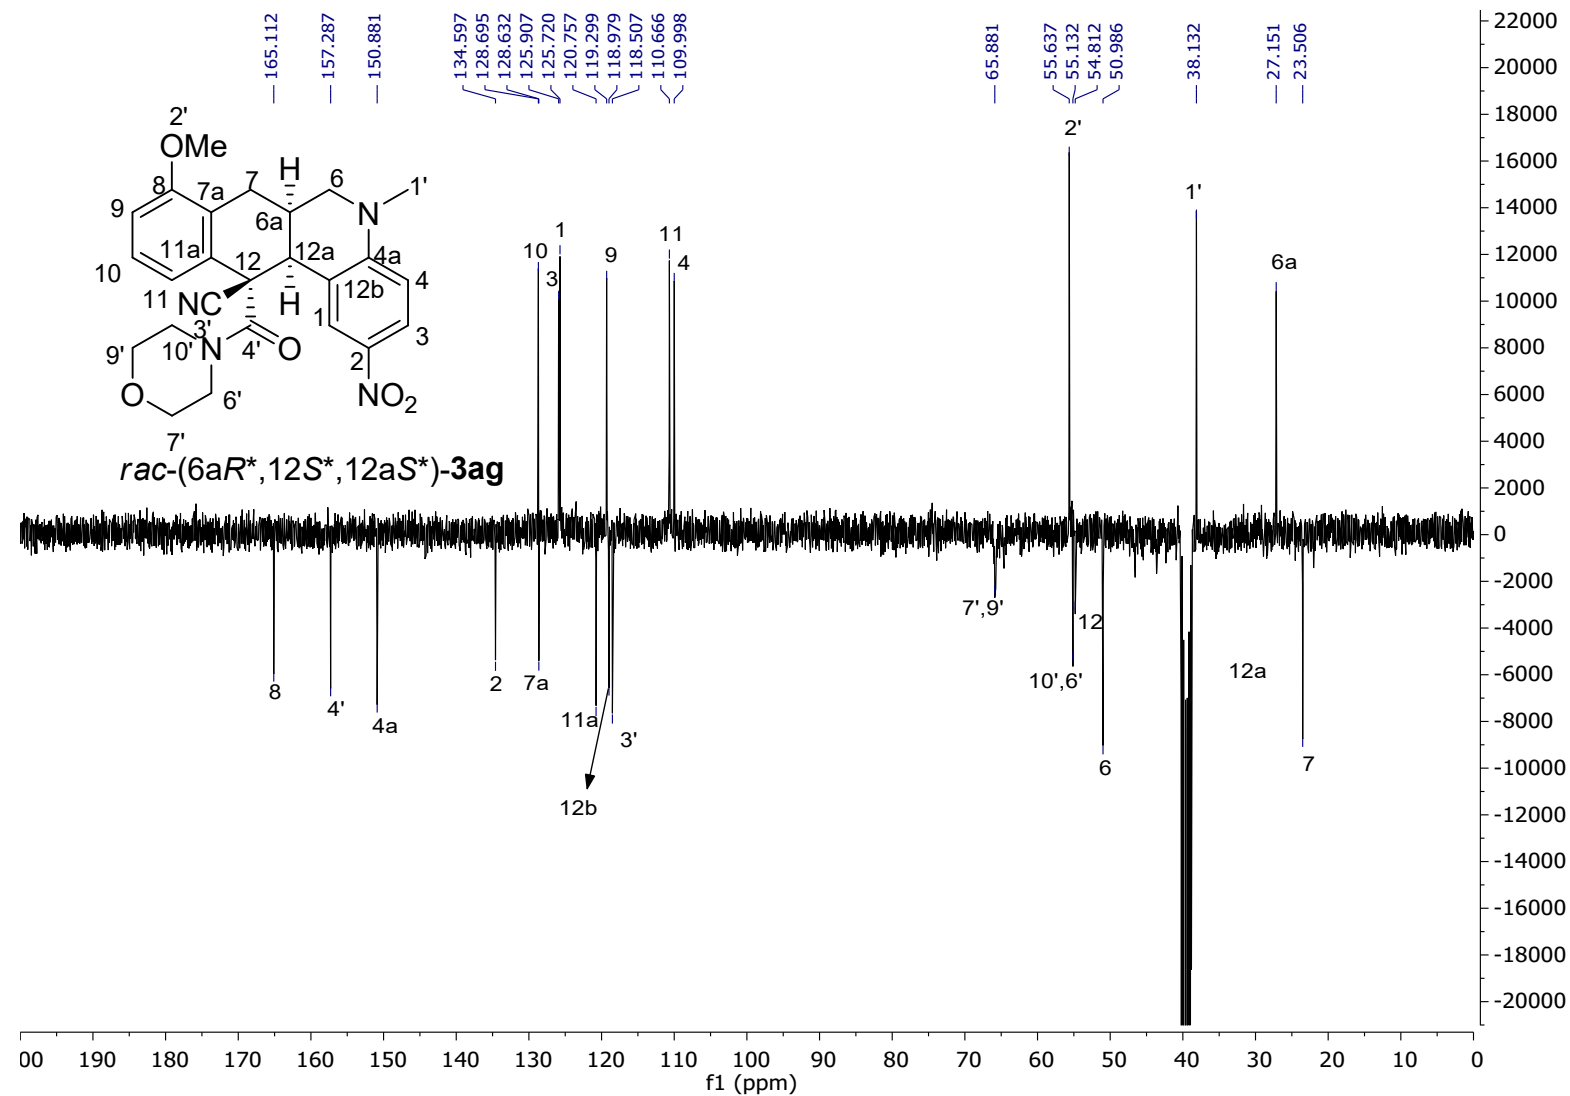

Figure S25. <sup>13</sup>C-NMR spectrum of the *rac*-(6a*R*<sup>\*</sup>,12*S*<sup>\*</sup>,12a*S*<sup>\*</sup>)-**3ag** in DMSO-d<sub>6</sub> at 90 MHz.

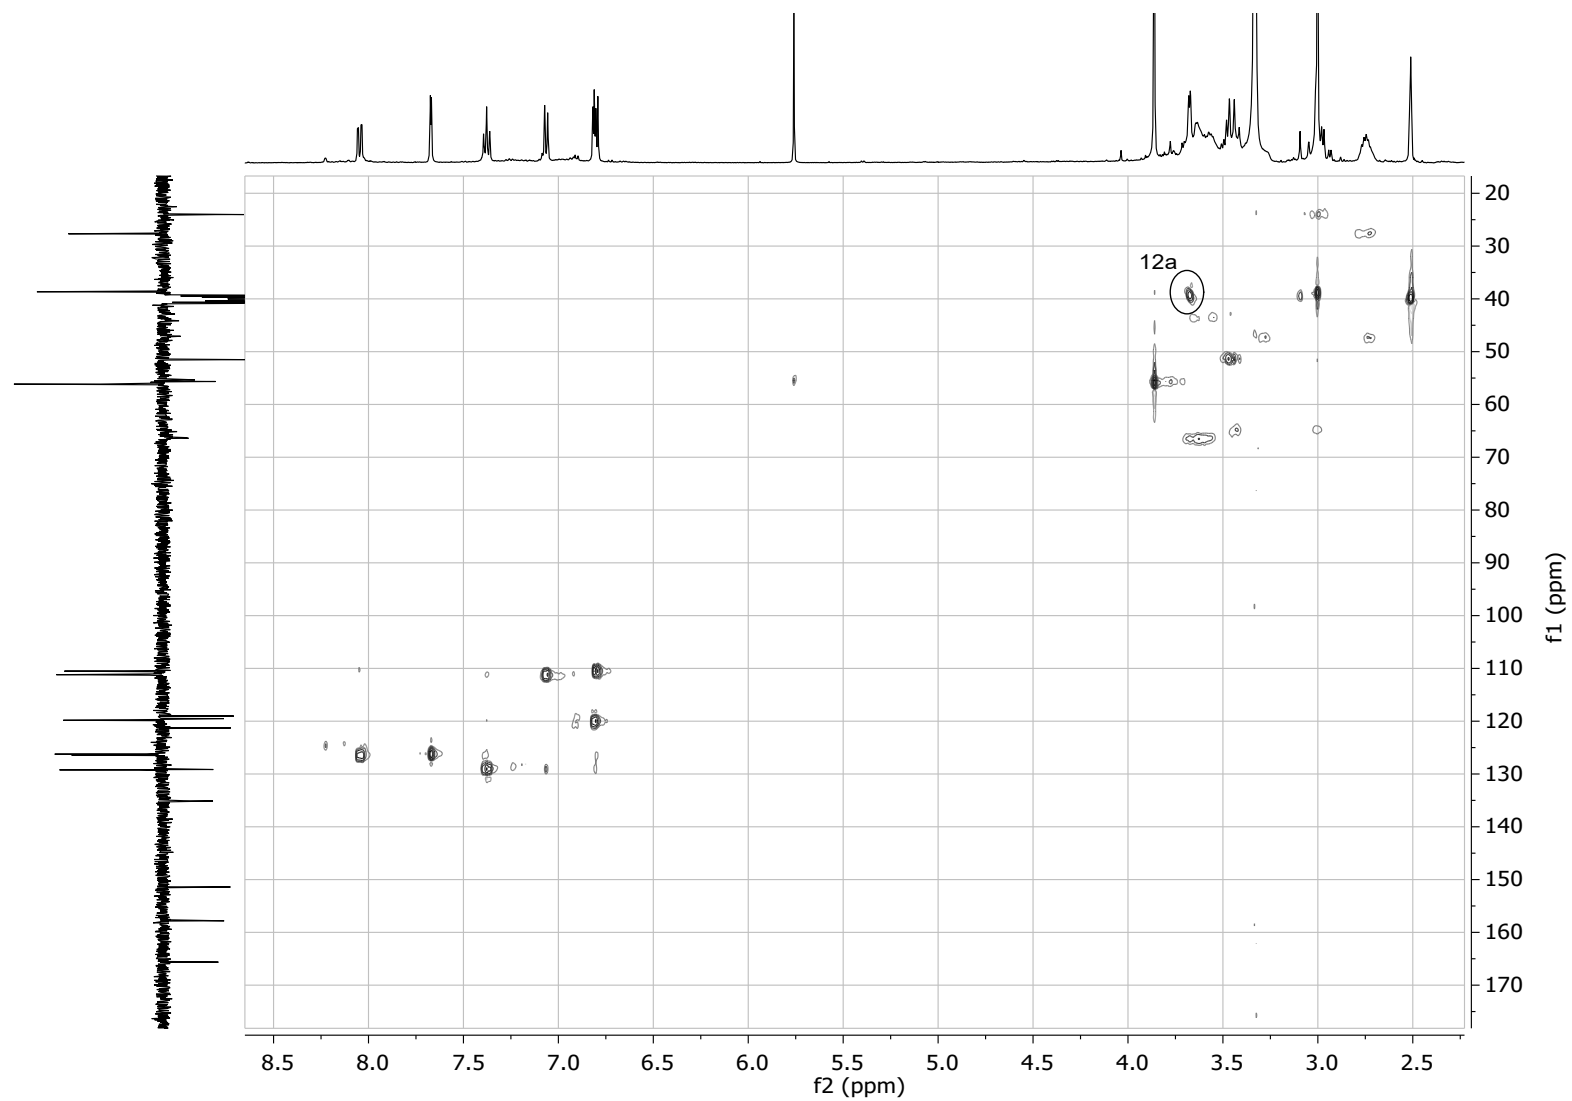

Figure S26. HSQC spectrum of the *rac*-(6aR\*,12S\*,12aS\*)-**3ag** in DMSO-d<sub>6</sub> at 500 MHz.

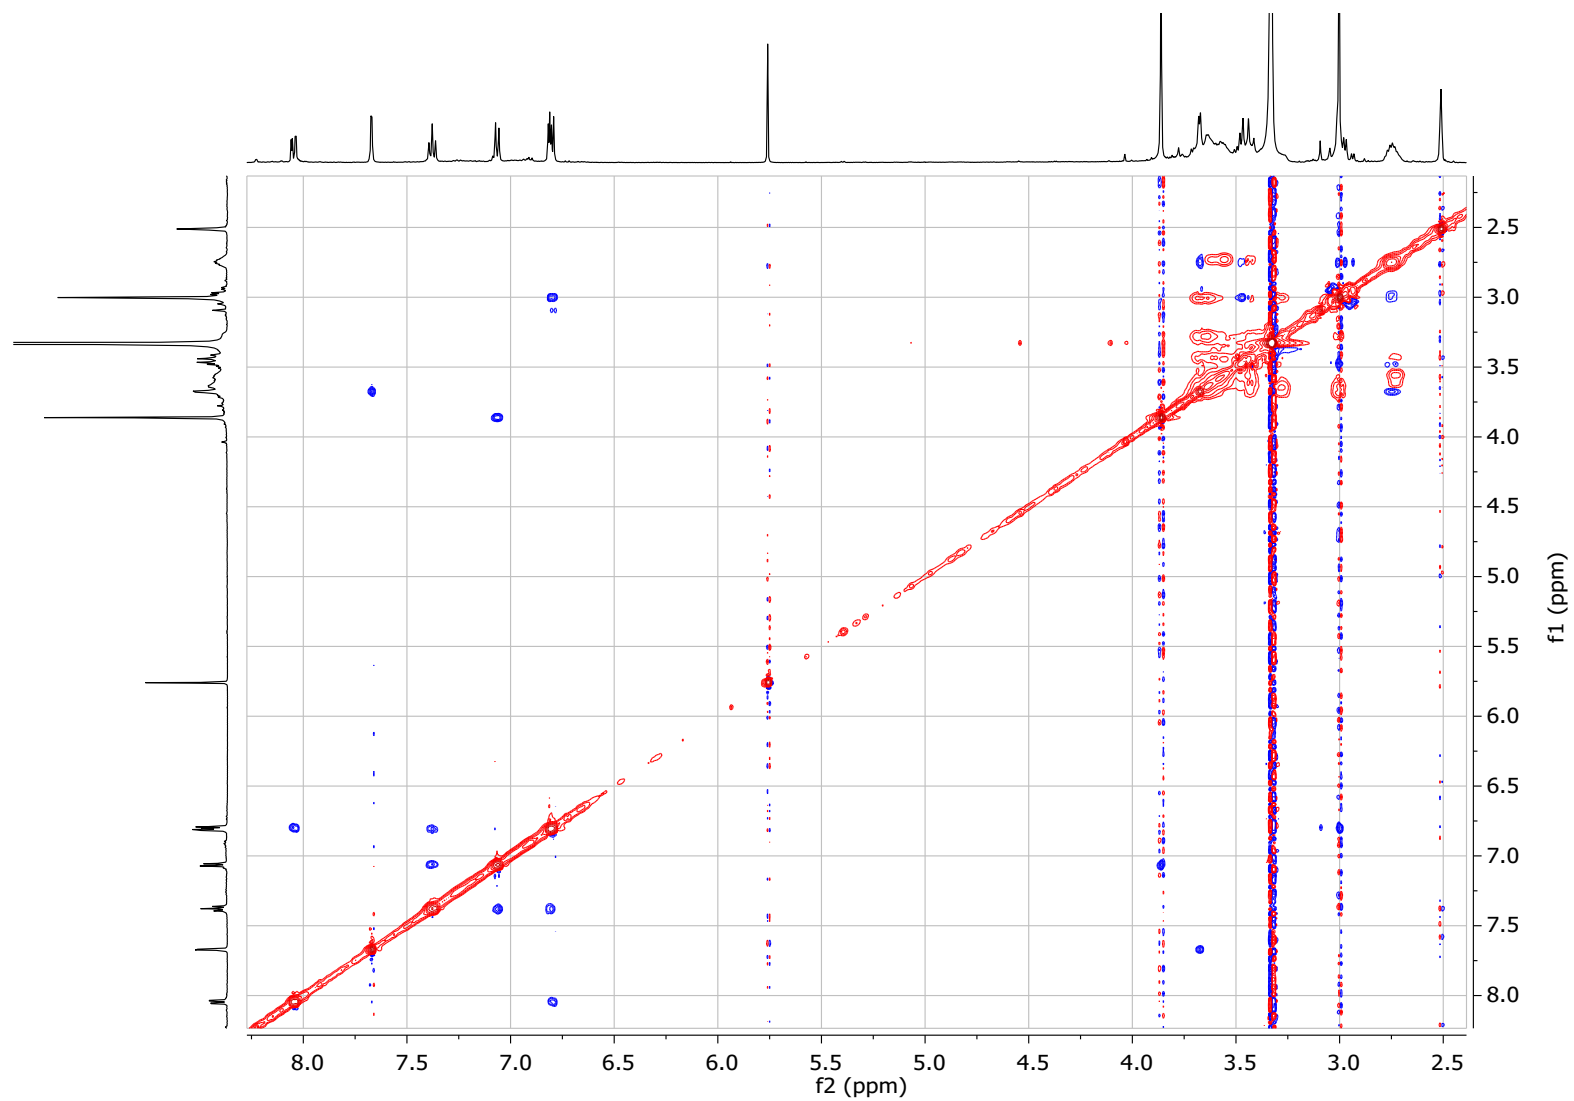

Figure S27. ROESY spectrum of the *rac*-(6aR\*,12S\*,12aS\*)-3ag in DMSO-d<sub>6</sub> at 500 MHz.

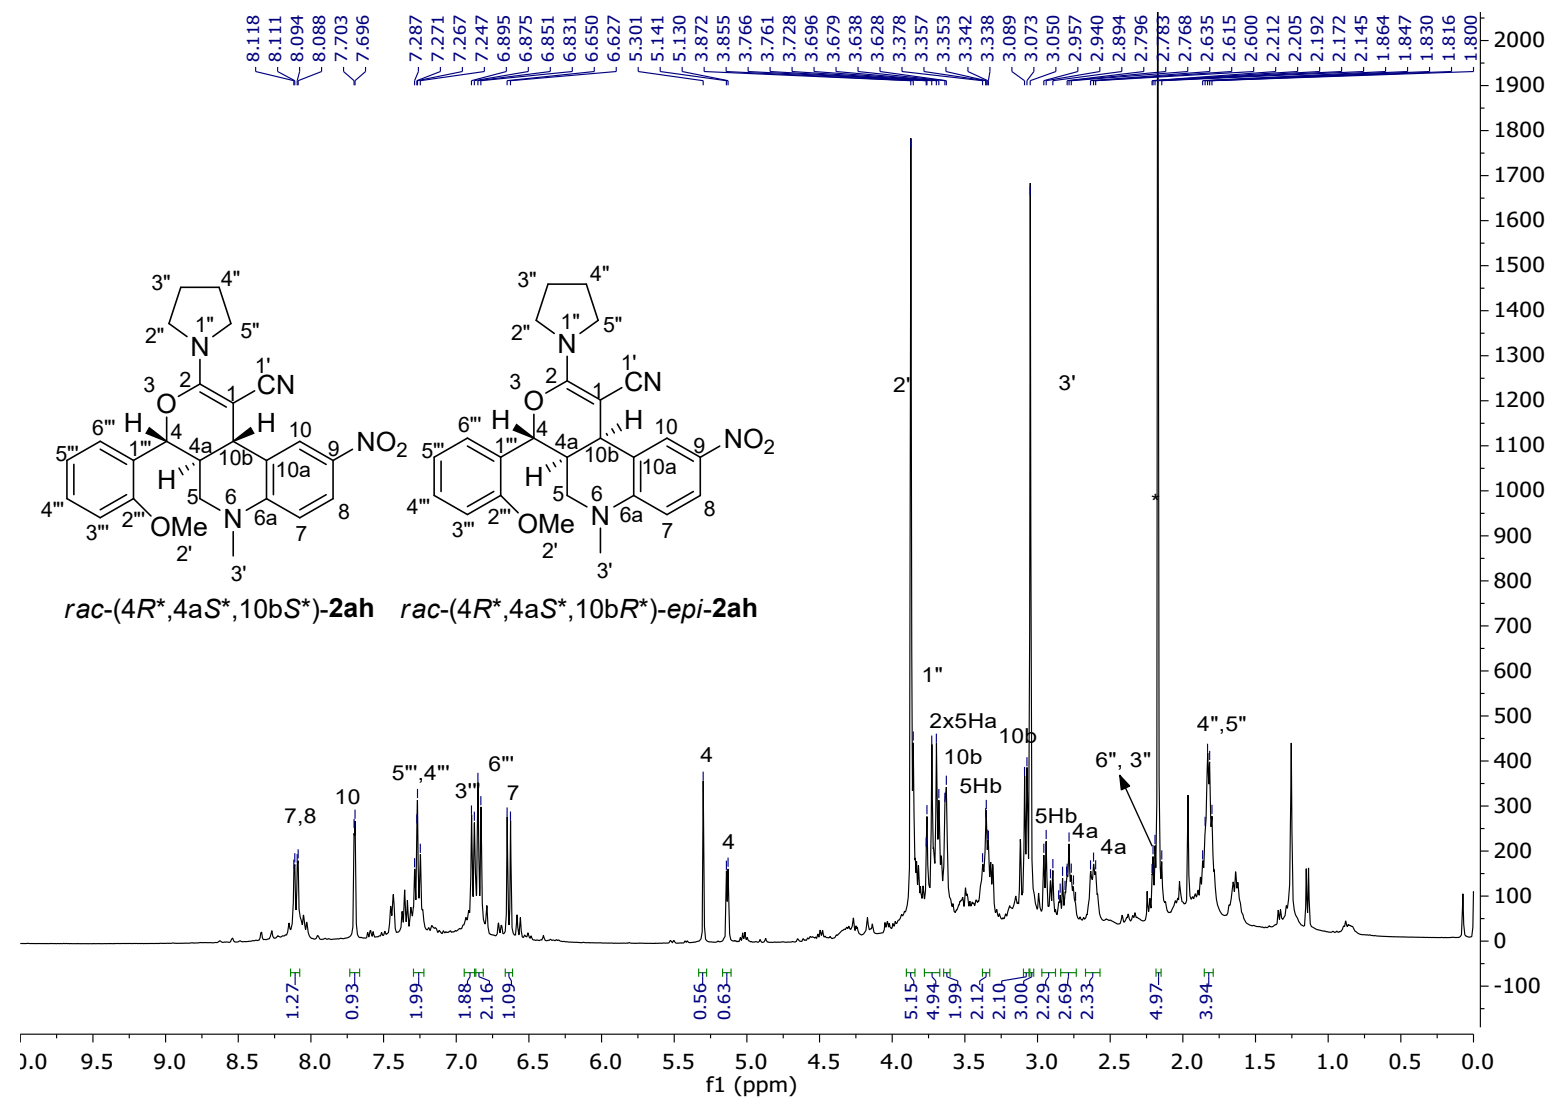

Figure S28. <sup>1</sup>H-NMR spectrum of the *rac*-(4*R*<sup>\*</sup>,4*aS*<sup>\*</sup>,10*bS*<sup>\*</sup>)-**2ah** and *rac*-(4*R*<sup>\*</sup>,4*aS*<sup>\*</sup>,10*bR*<sup>\*</sup>)-*epi*-**2ah** in CDCl<sub>3</sub> at 400 MHz.

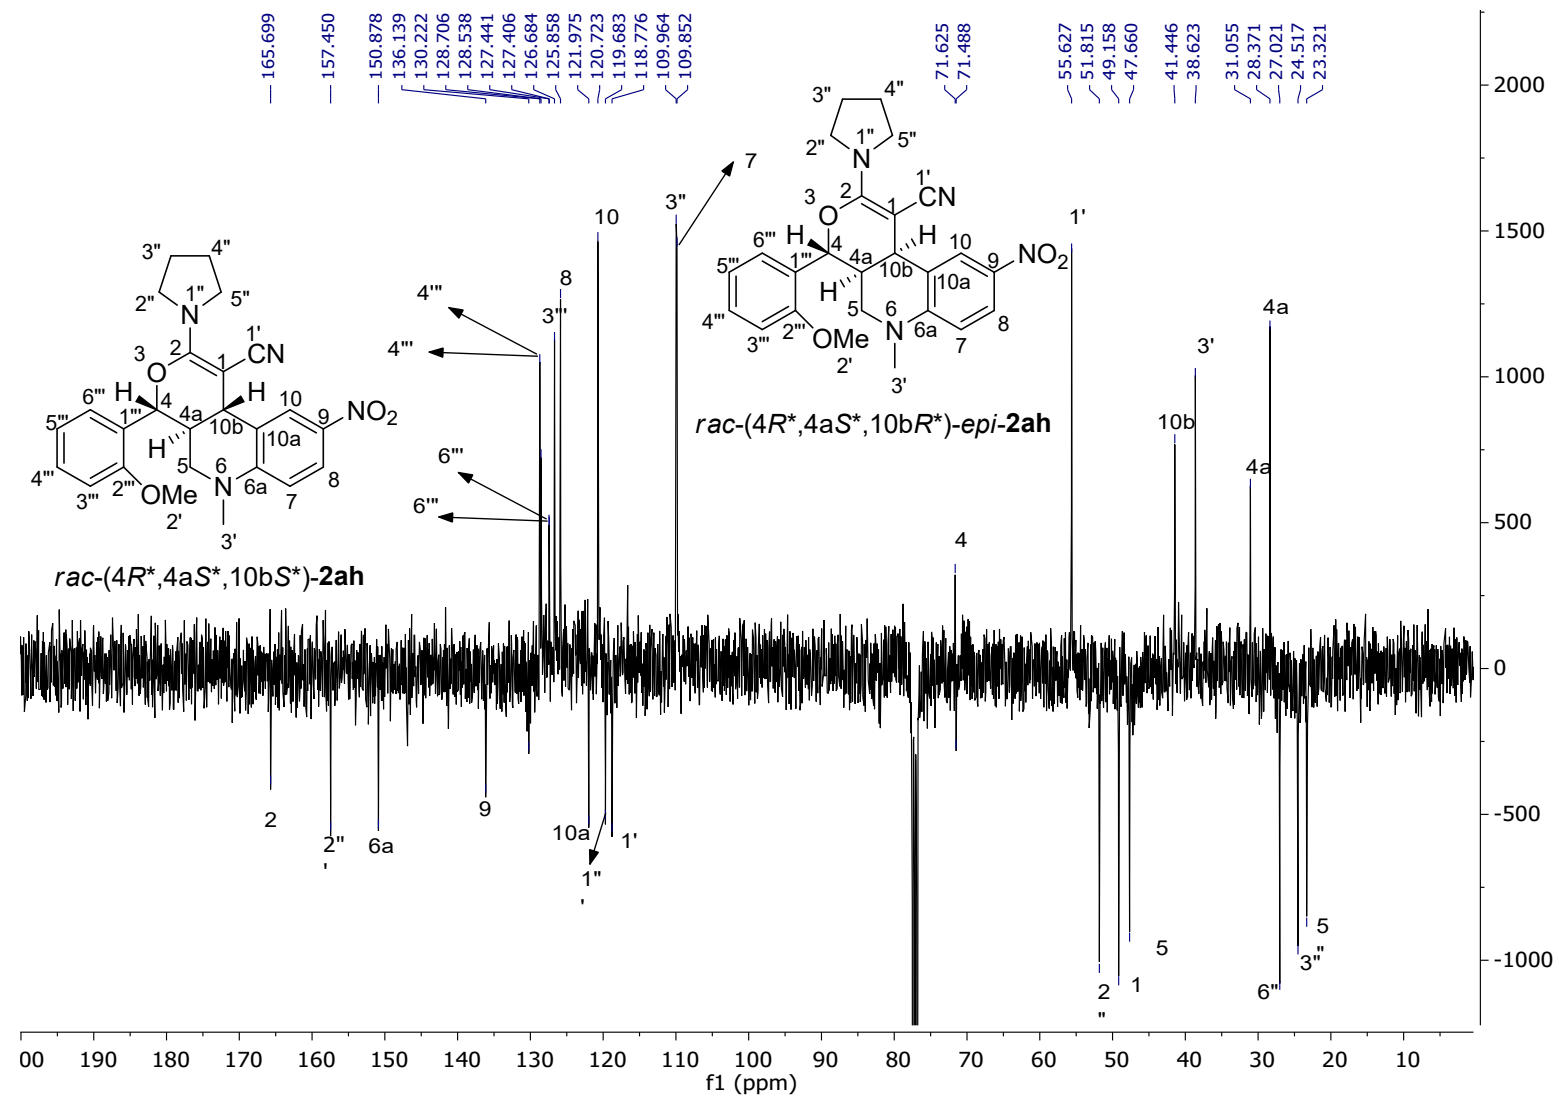

Figure S29. <sup>1</sup>H-NMR spectrum of the *rac*-(4*R*<sup>\*</sup>,4*aS*<sup>\*</sup>,10*bS*<sup>\*</sup>)-**2ah** and *rac*-(4*R*<sup>\*</sup>,4*aS*<sup>\*</sup>,10*bR*<sup>\*</sup>)-*epi*-**2ah** in CDCl<sub>3</sub> at 100 MHz.

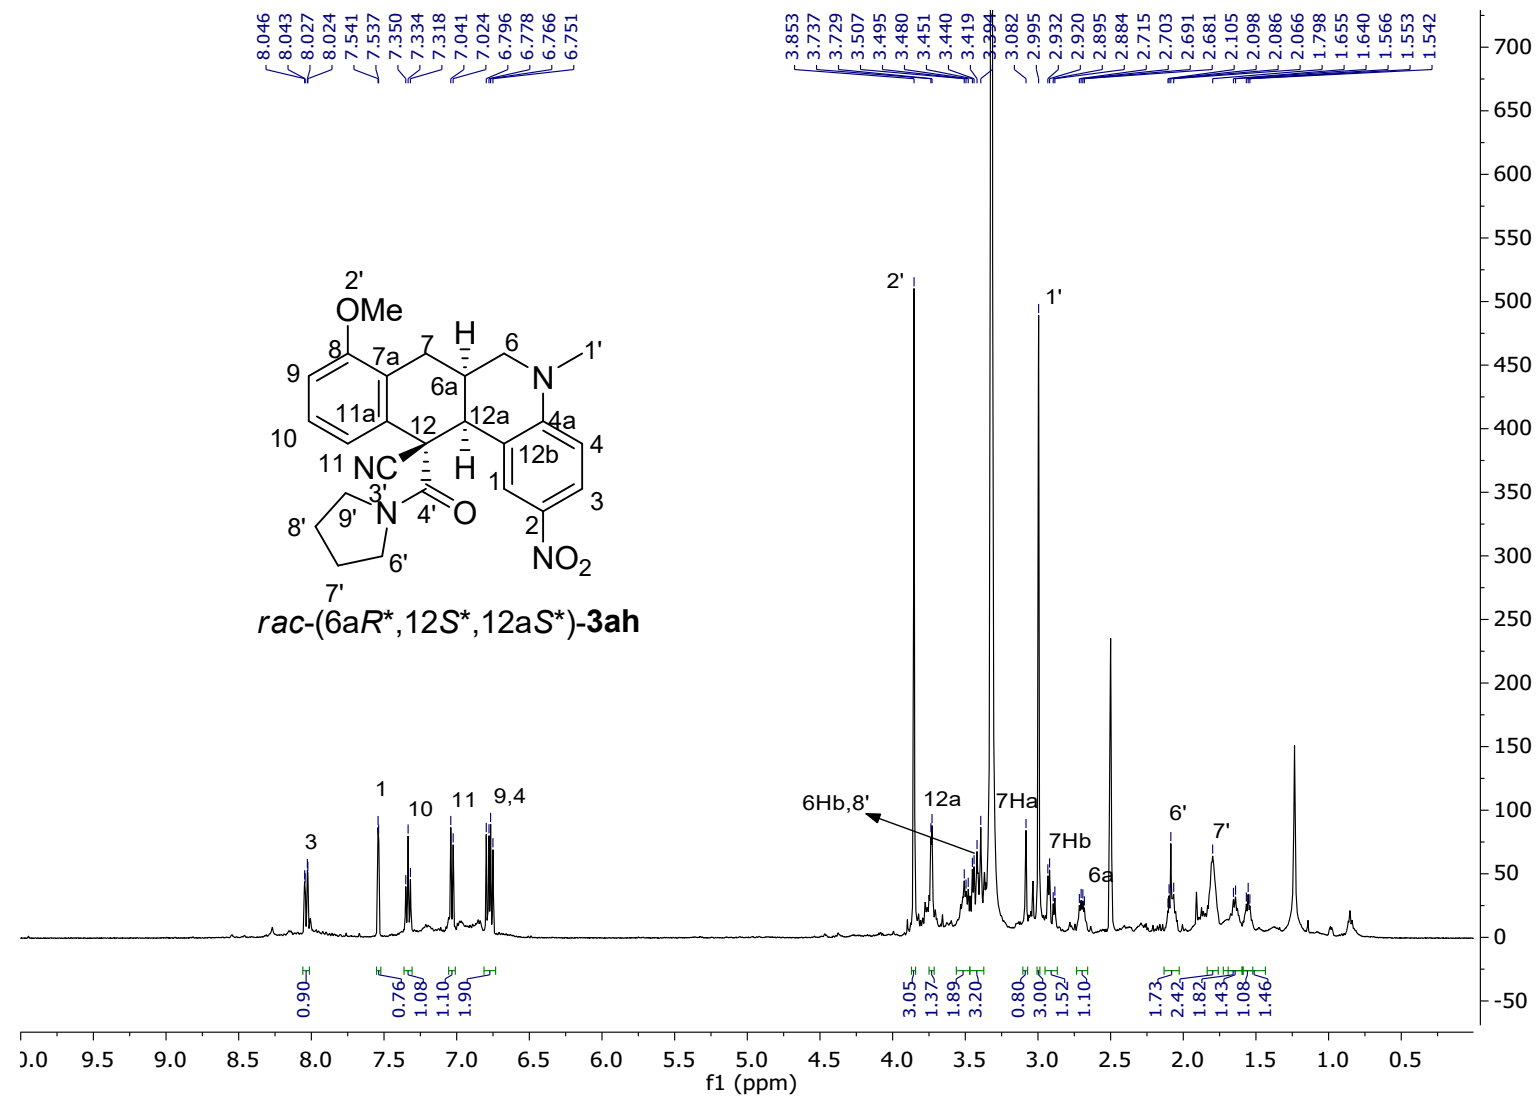

Figure S30. <sup>1</sup>H-NMR spectrum of the *rac*-(6aR\*,12S\*,12aS\*)-3ah in DMSO-d<sub>6</sub> at 500 MHz.



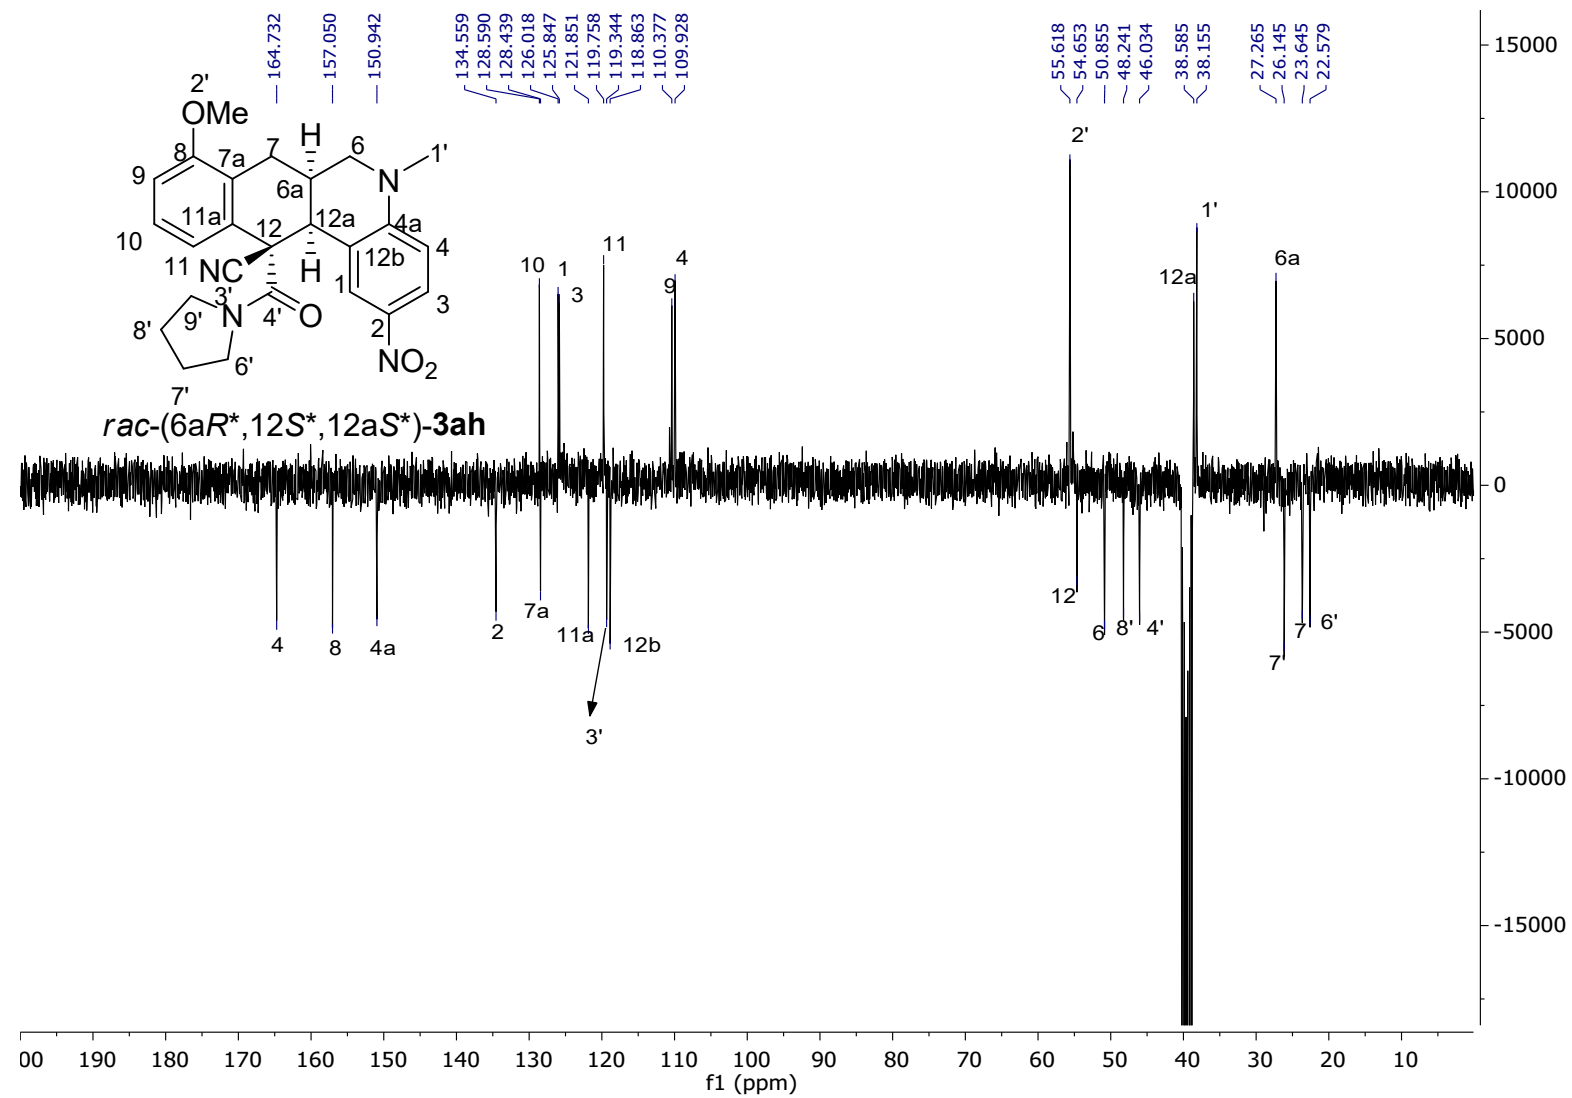

Figure S31. <sup>13</sup>C-NMR spectrum of the *rac*-(6aR\*,12S\*,12aS\*)-3ah in DMSO-d<sub>6</sub> at 125 MHz.

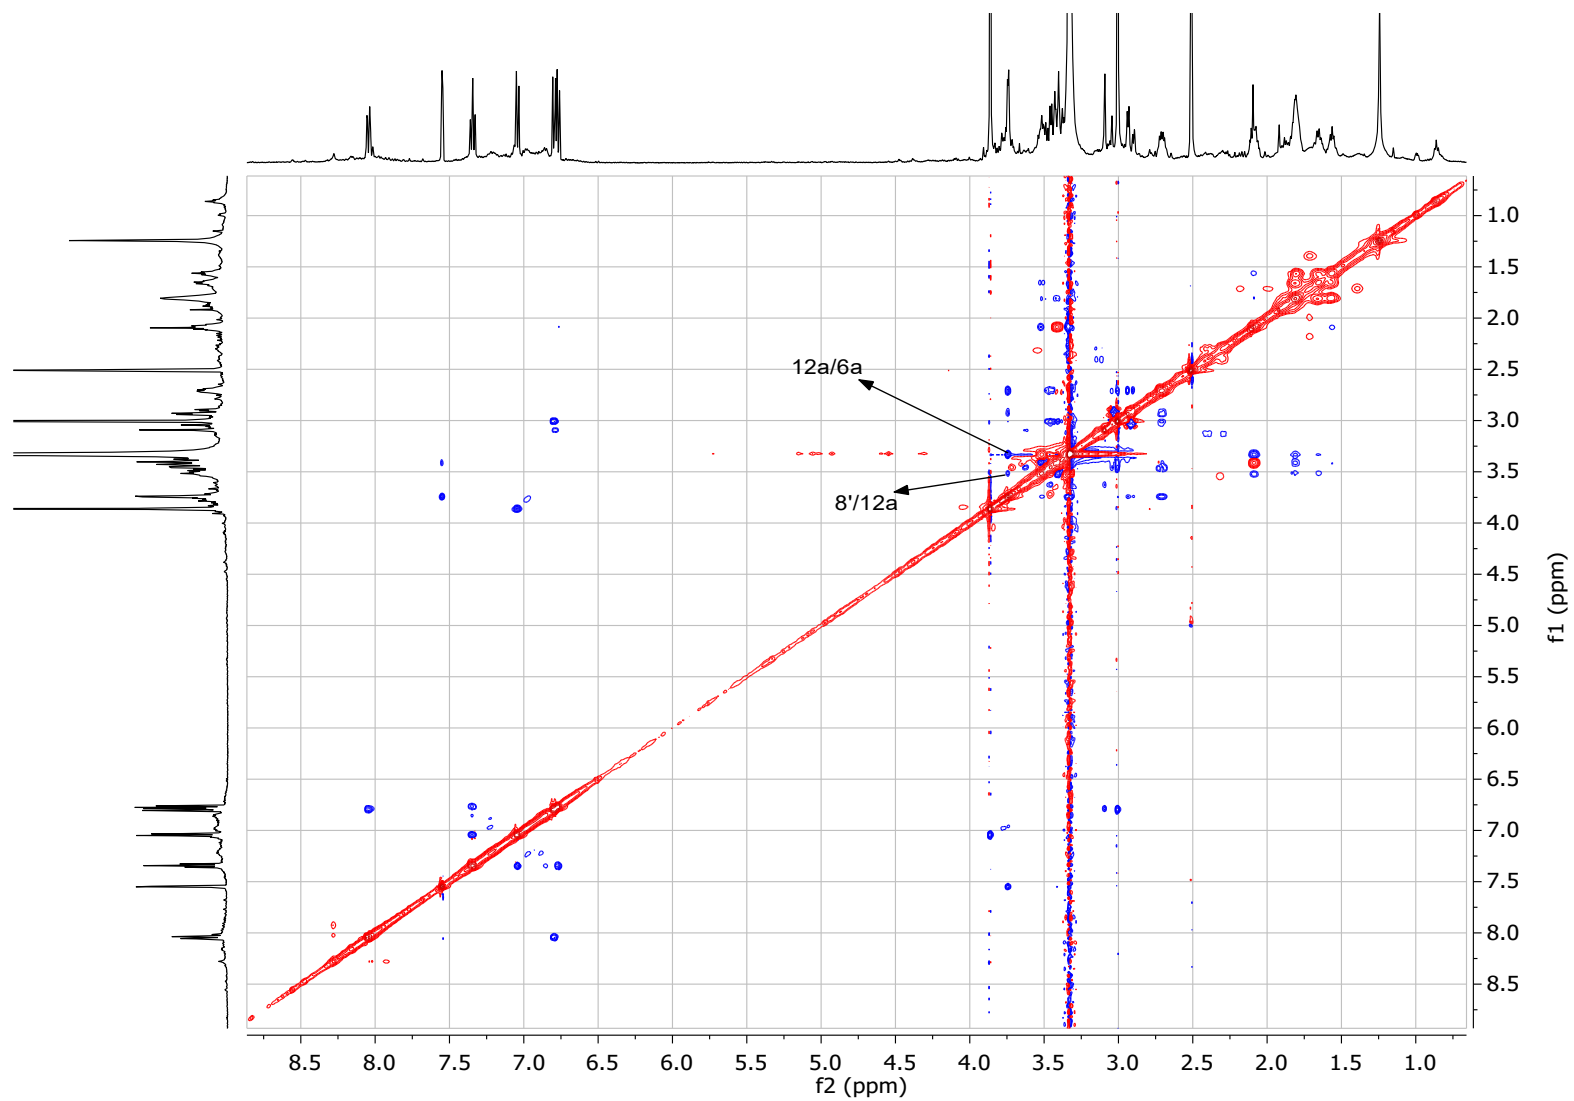

Figure S32. ROESY spectrum of the *rac*-(6aR\*,12S\*,12aS\*)-3ah in DMSO-d<sub>6</sub> at 500 MHz.

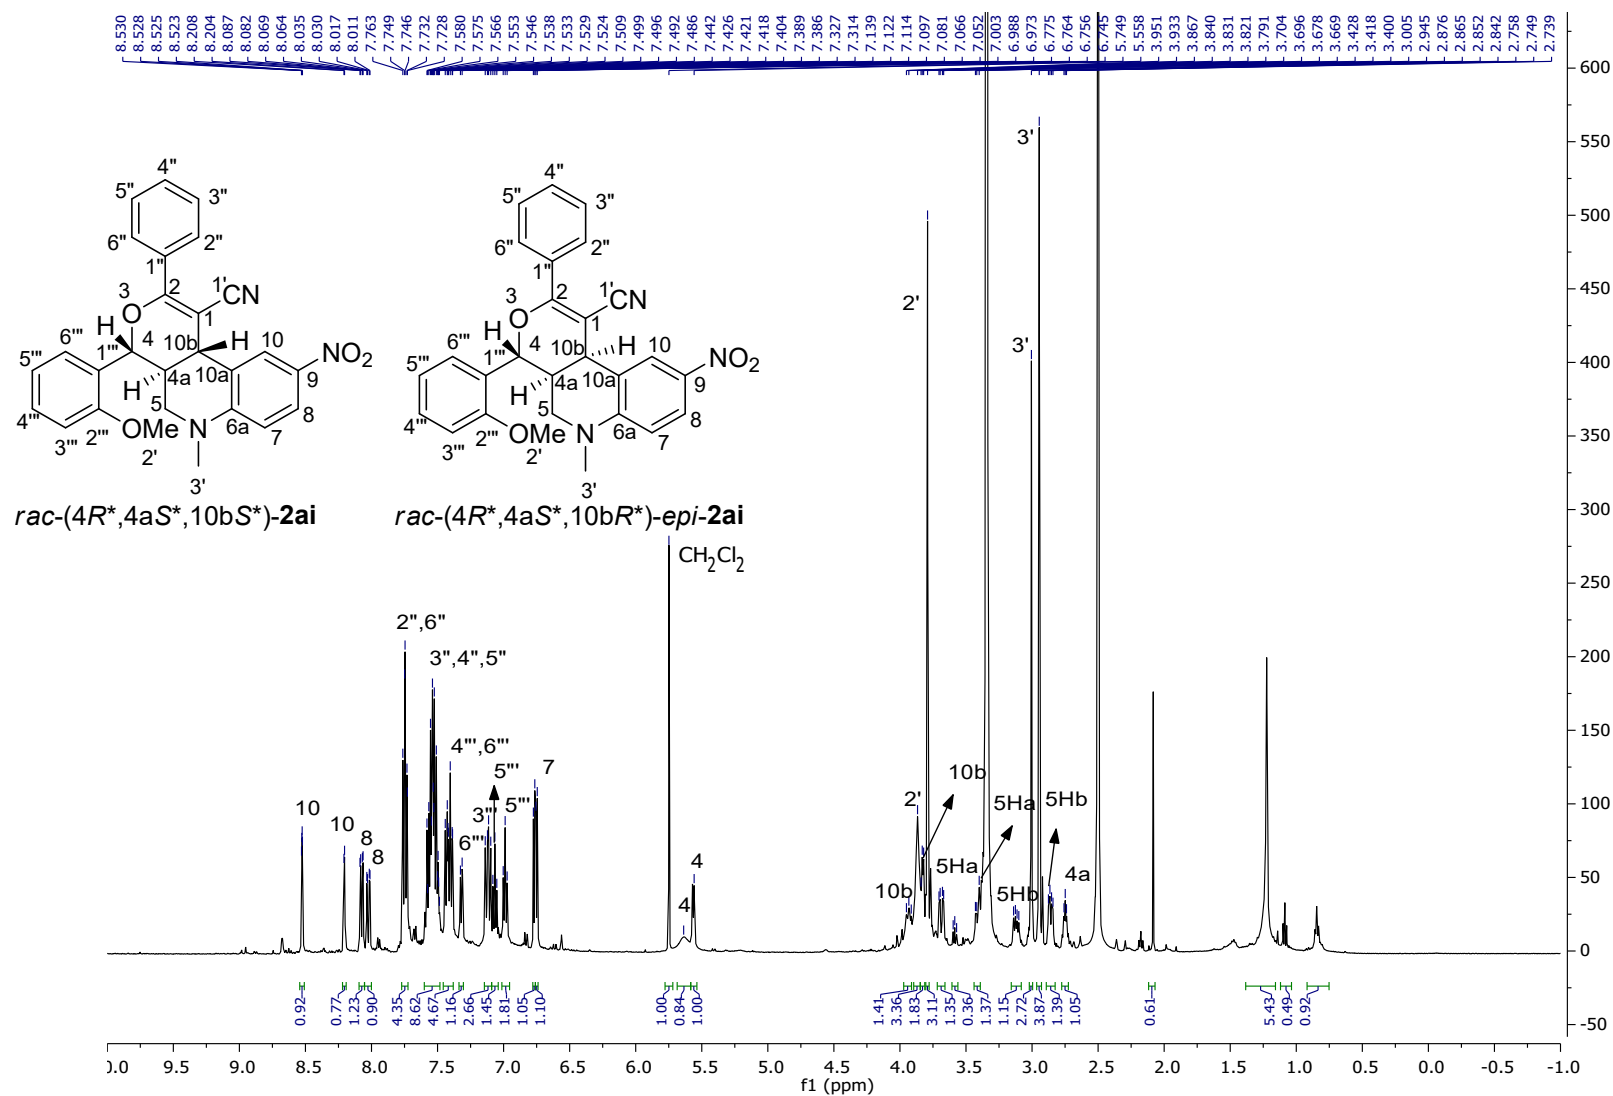

Figure S33. <sup>1</sup>H-NMR spectrum of *rac*-(4*R*<sup>\*</sup>,4*aS*<sup>\*</sup>,10*bS*<sup>\*</sup>)-**2ai** and *rac*-(4*R*<sup>\*</sup>,4*aS*<sup>\*</sup>,10*bR*<sup>\*</sup>)-*epi*-**2ai** in DMSO-*d*<sub>6</sub> at 500 MHz.



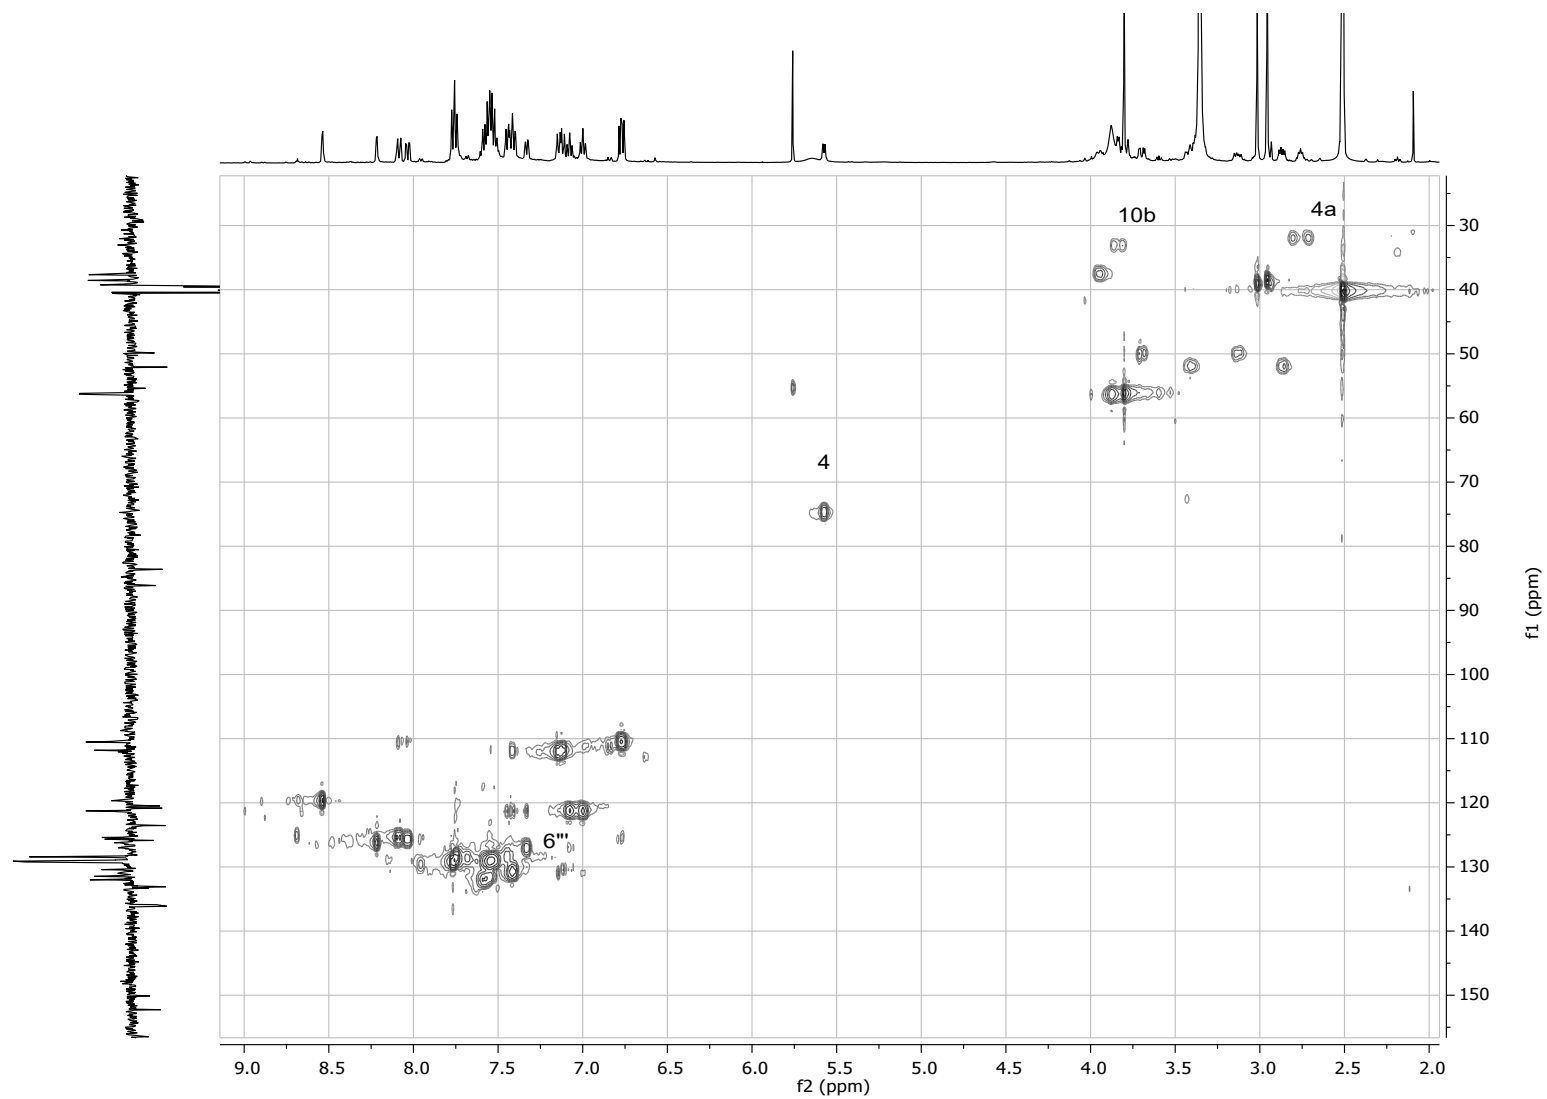

Figure S35. HSQC spectrum of *rac*-(4*R*\*,4*aS*\*,10*bS*\*)-**2ai** and *rac*-(4*R*\*,4*aS*\*,10*bR*\*)-*epi*-**2ai** in DMSO-*d*<sub>6</sub> at 500 MHz.

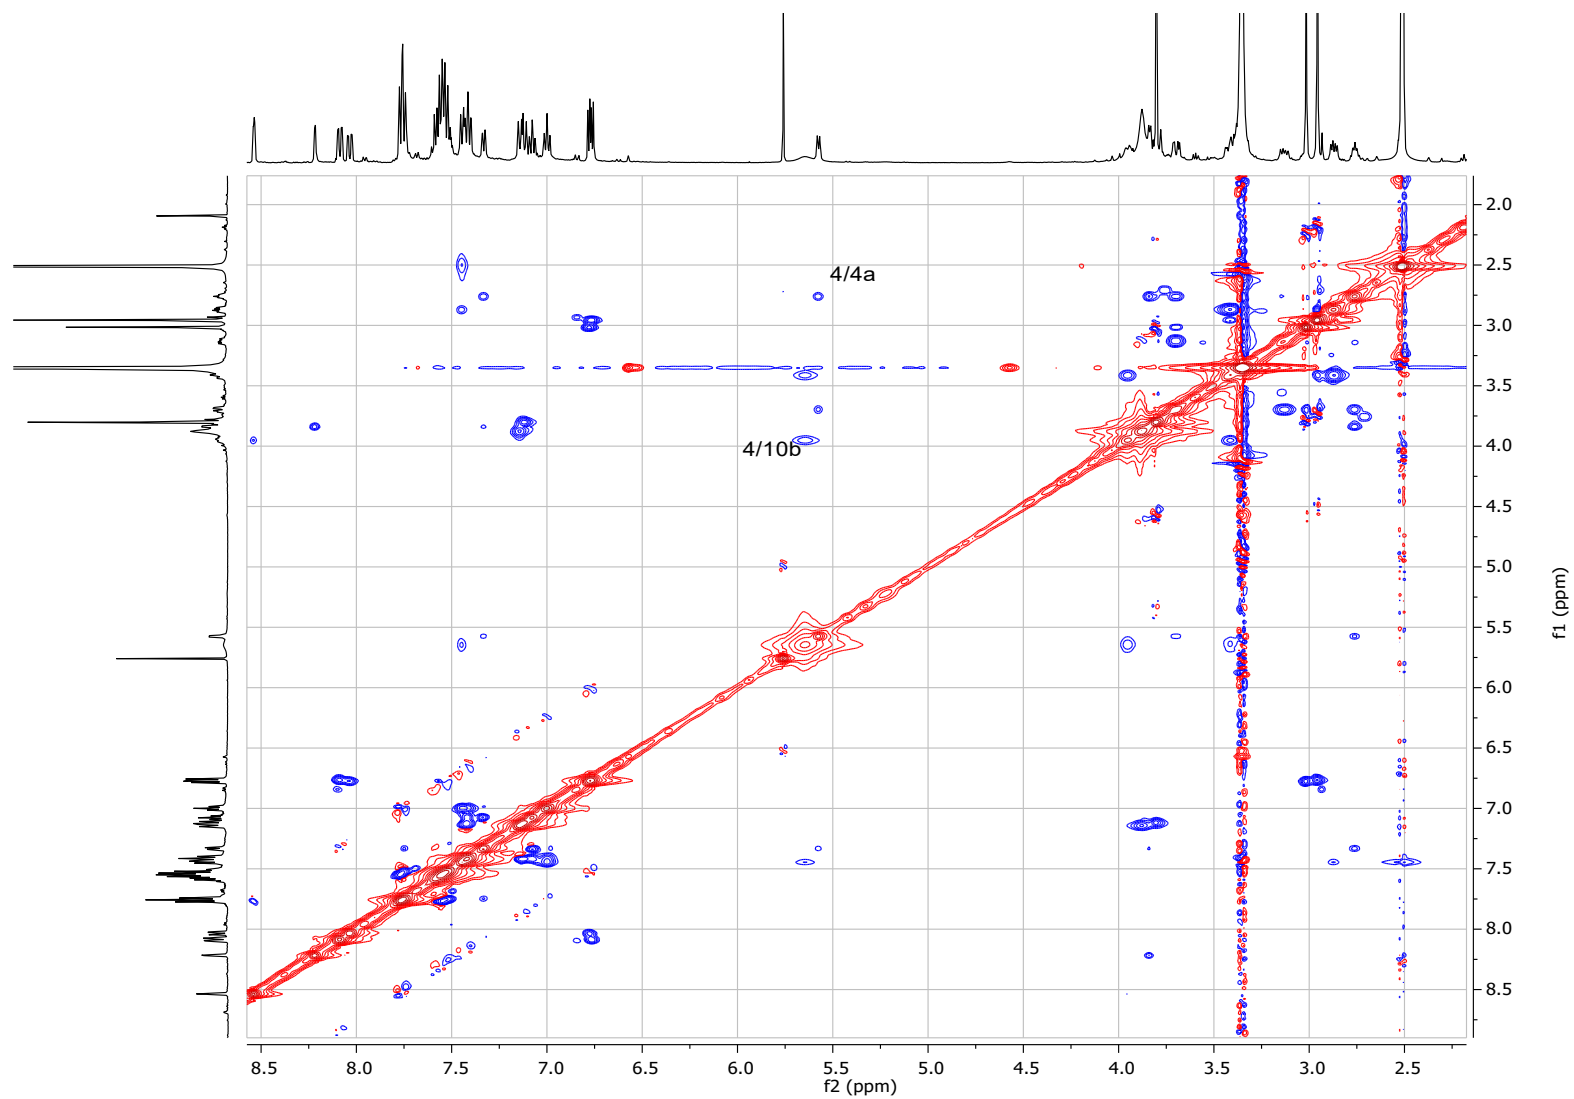

Figure S36. ROESY spectrum of *rac*-(4*R*<sup>\*</sup>,4*a**S*<sup>\*</sup>,10*b**S*<sup>\*</sup>)-**2ai** and *rac*-(4*R*<sup>\*</sup>,4*a**S*<sup>\*</sup>,10*b**R*<sup>\*</sup>)-*epi*-**2ai** in DMSO-*d*<sub>6</sub> at 500 MHz.



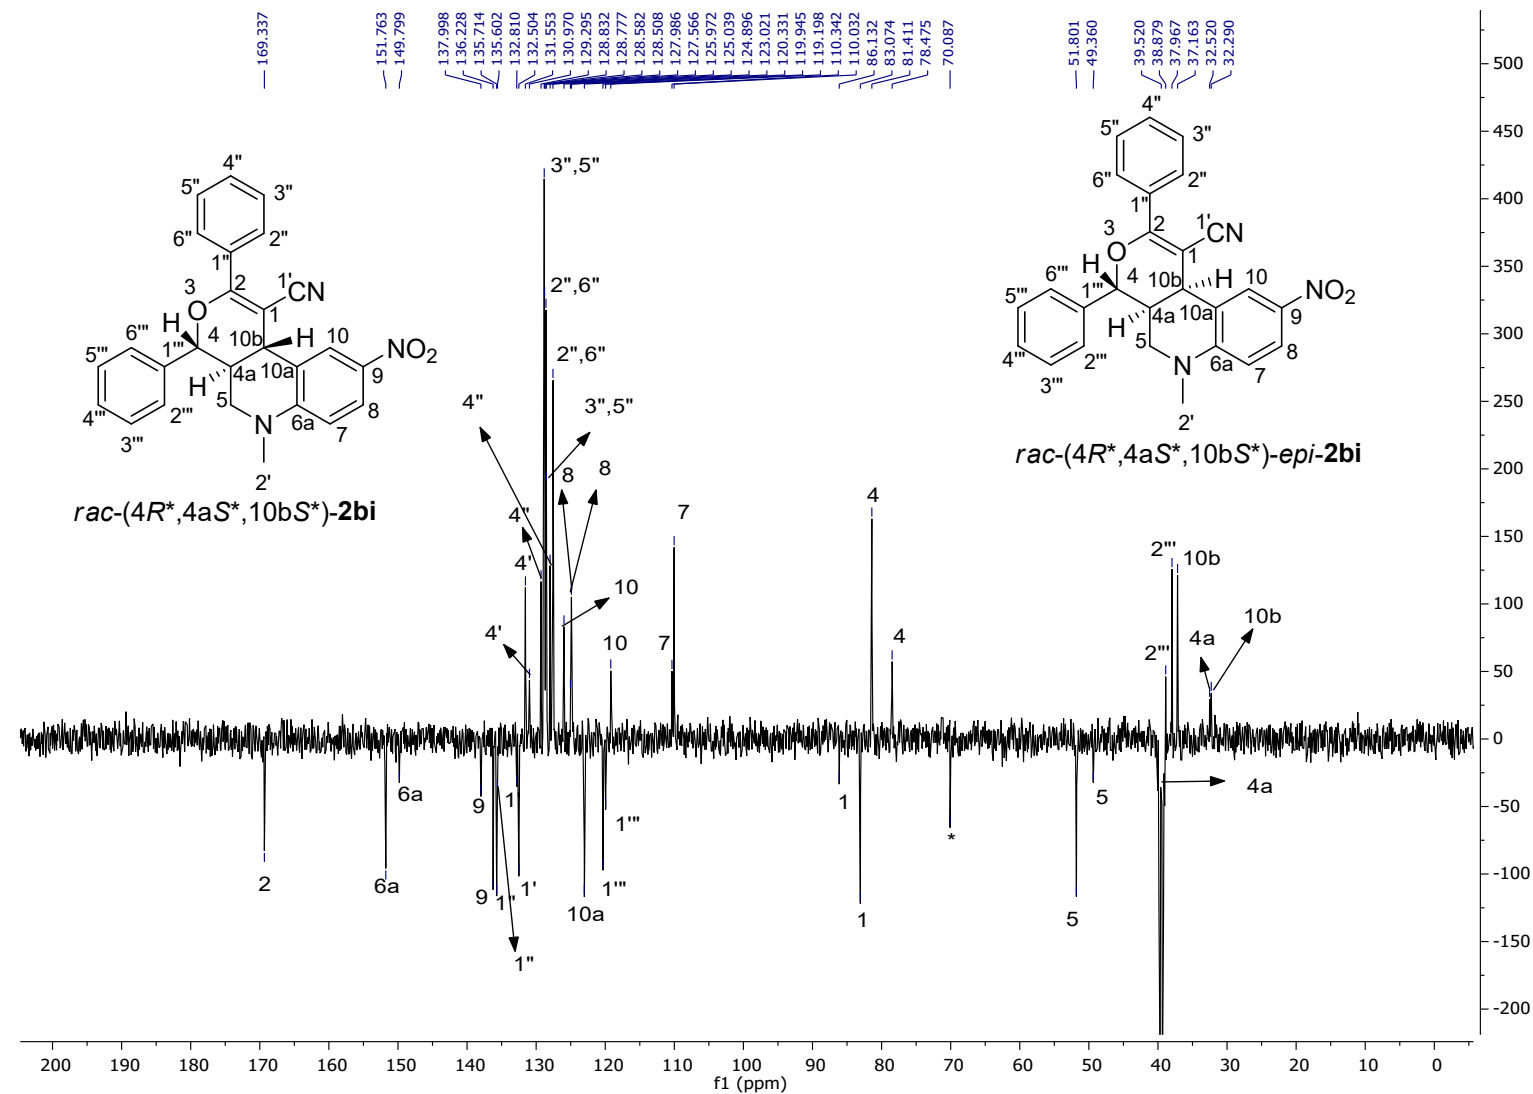

Figure S38. <sup>13</sup>C-NMR spectrum of *rac*-(4*R*<sup>\*</sup>,4*aS*<sup>\*</sup>,10*bS*<sup>\*</sup>)-**2bi** and *rac*-(4*R*<sup>\*</sup>,4*aS*<sup>\*</sup>,10*bR*<sup>\*</sup>)-*epi*-**2bi** in DMSO-*d*<sub>6</sub> at 125 MHz.



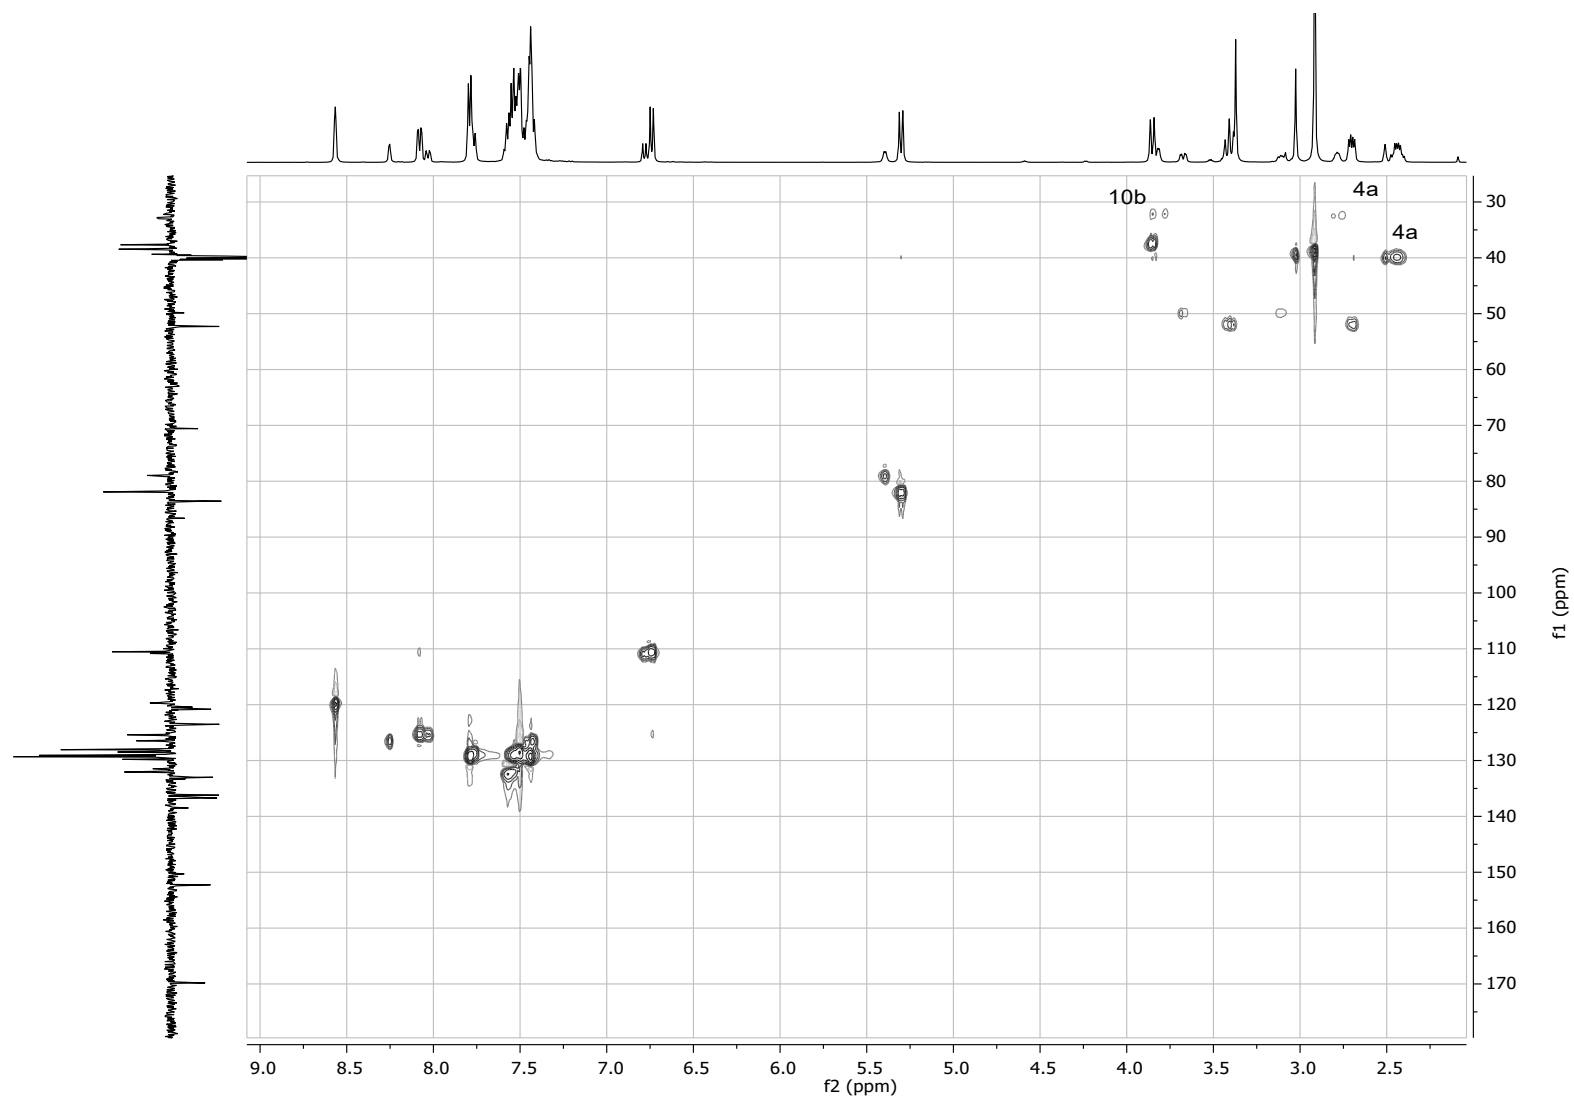

Figure S39. HSQC spectrum of *rac*-(4*R*<sup>\*</sup>,4*aS*<sup>\*</sup>,10*bS*<sup>\*</sup>)-**2bi** and *rac*-(4*R*<sup>\*</sup>,4*aS*<sup>\*</sup>,10*bR*<sup>\*</sup>)-*epi*-**2bi** in DMSO-*d*<sub>6</sub> at 500 MHz.

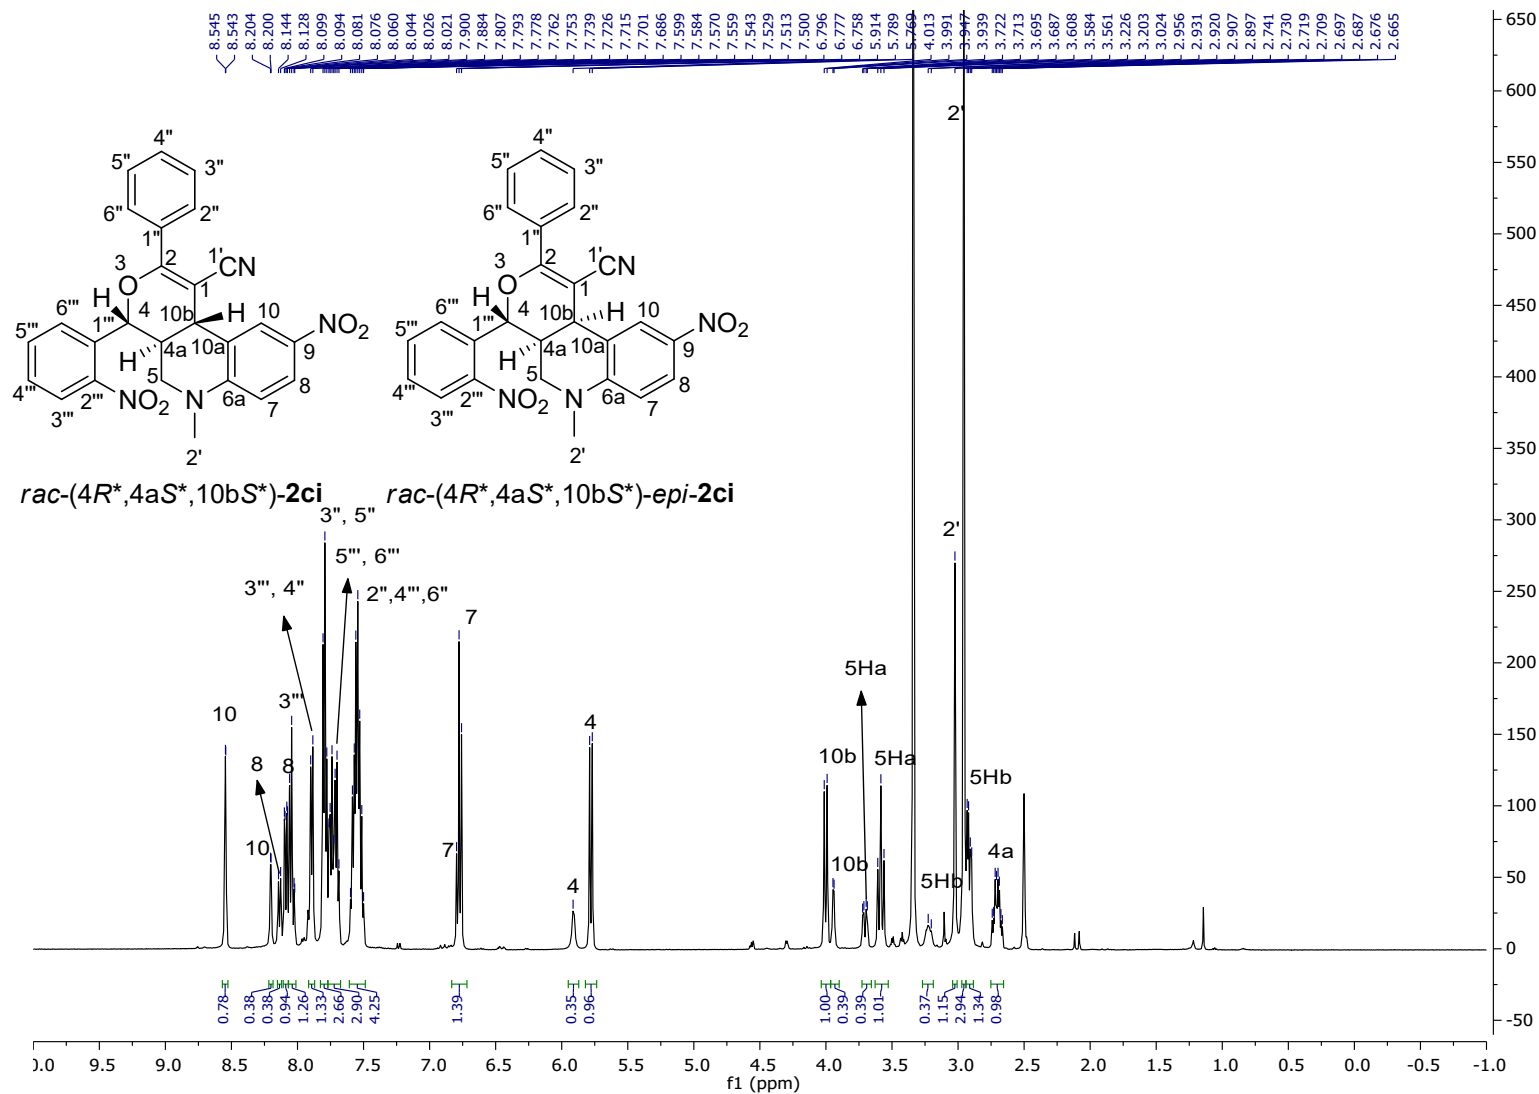

Figure S40.  $^1H$ -NMR spectrum of  $rac-(4R^*,4aS^*,10bS^*)-2ci$  and  $rac-(4R^*,4aS^*,10bR^*)-epi-2ci$  in  $DMSO-d_6$  at 500 MHz.

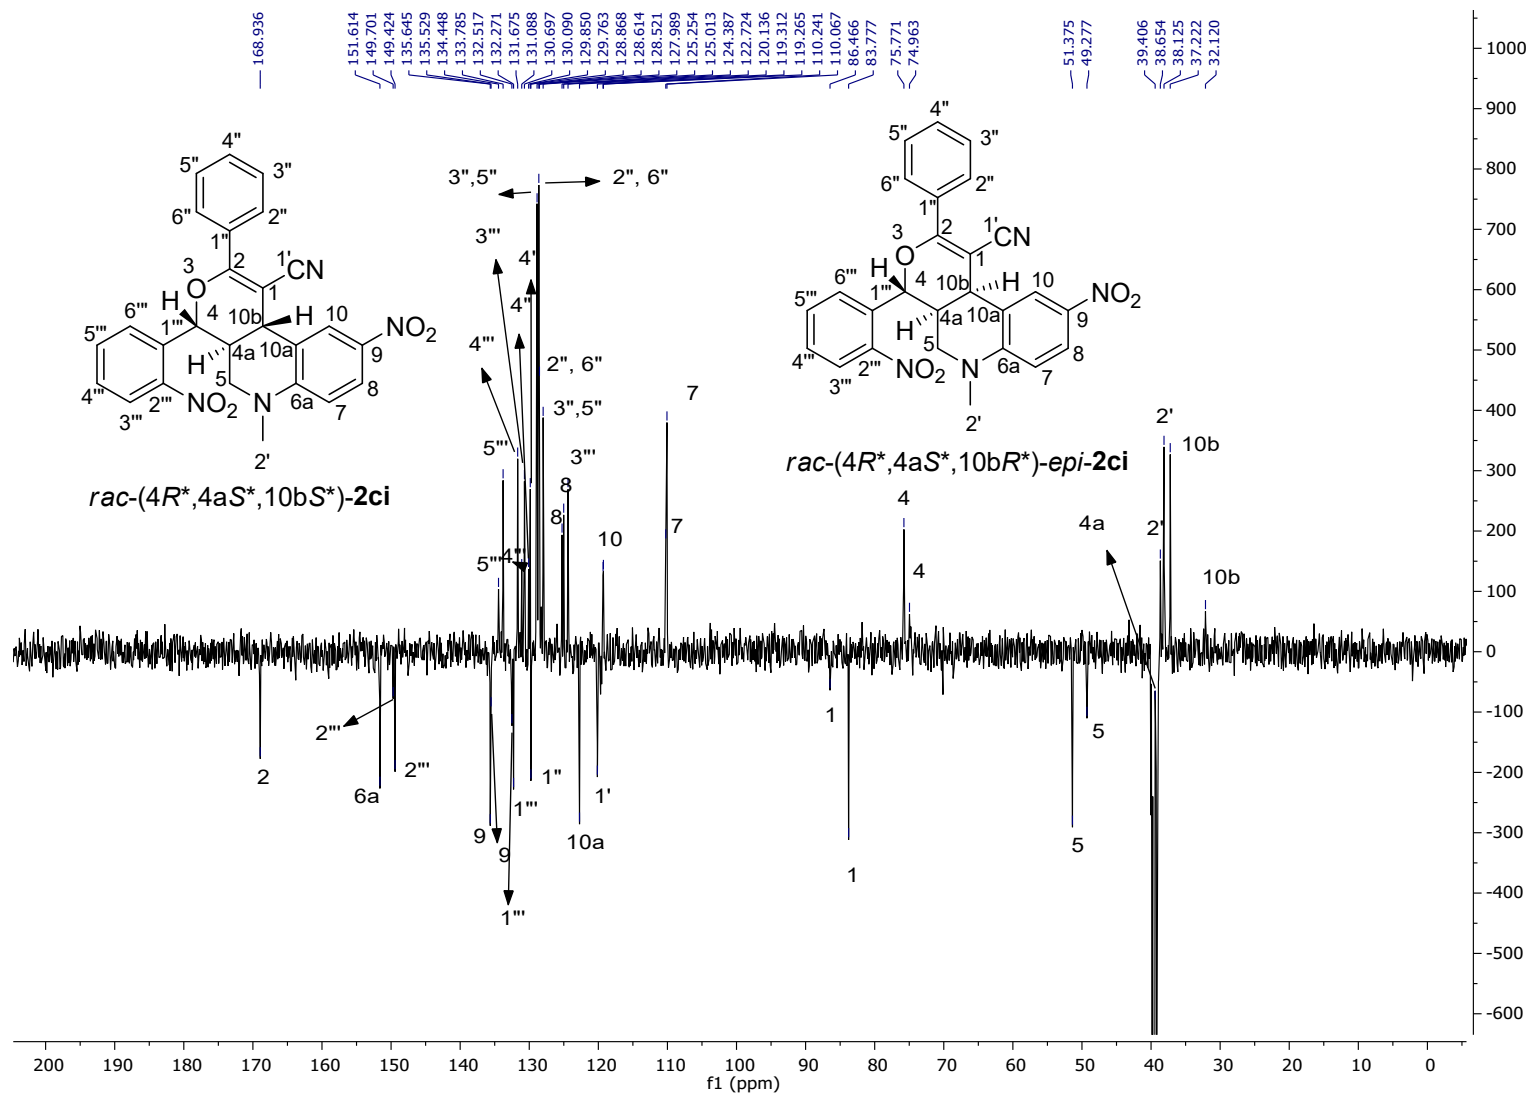

Figure S41. <sup>13</sup>C-NMR spectrum of *rac*-(4*R*<sup>\*</sup>,4*aS*<sup>\*</sup>,10*bS*<sup>\*</sup>)-**2ci** and *rac*-(4*R*<sup>\*</sup>,4*aS*<sup>\*</sup>,10*bR*<sup>\*</sup>)-*epi*-**2ci** in DMSO-*d*<sub>6</sub> at 125 MHz.

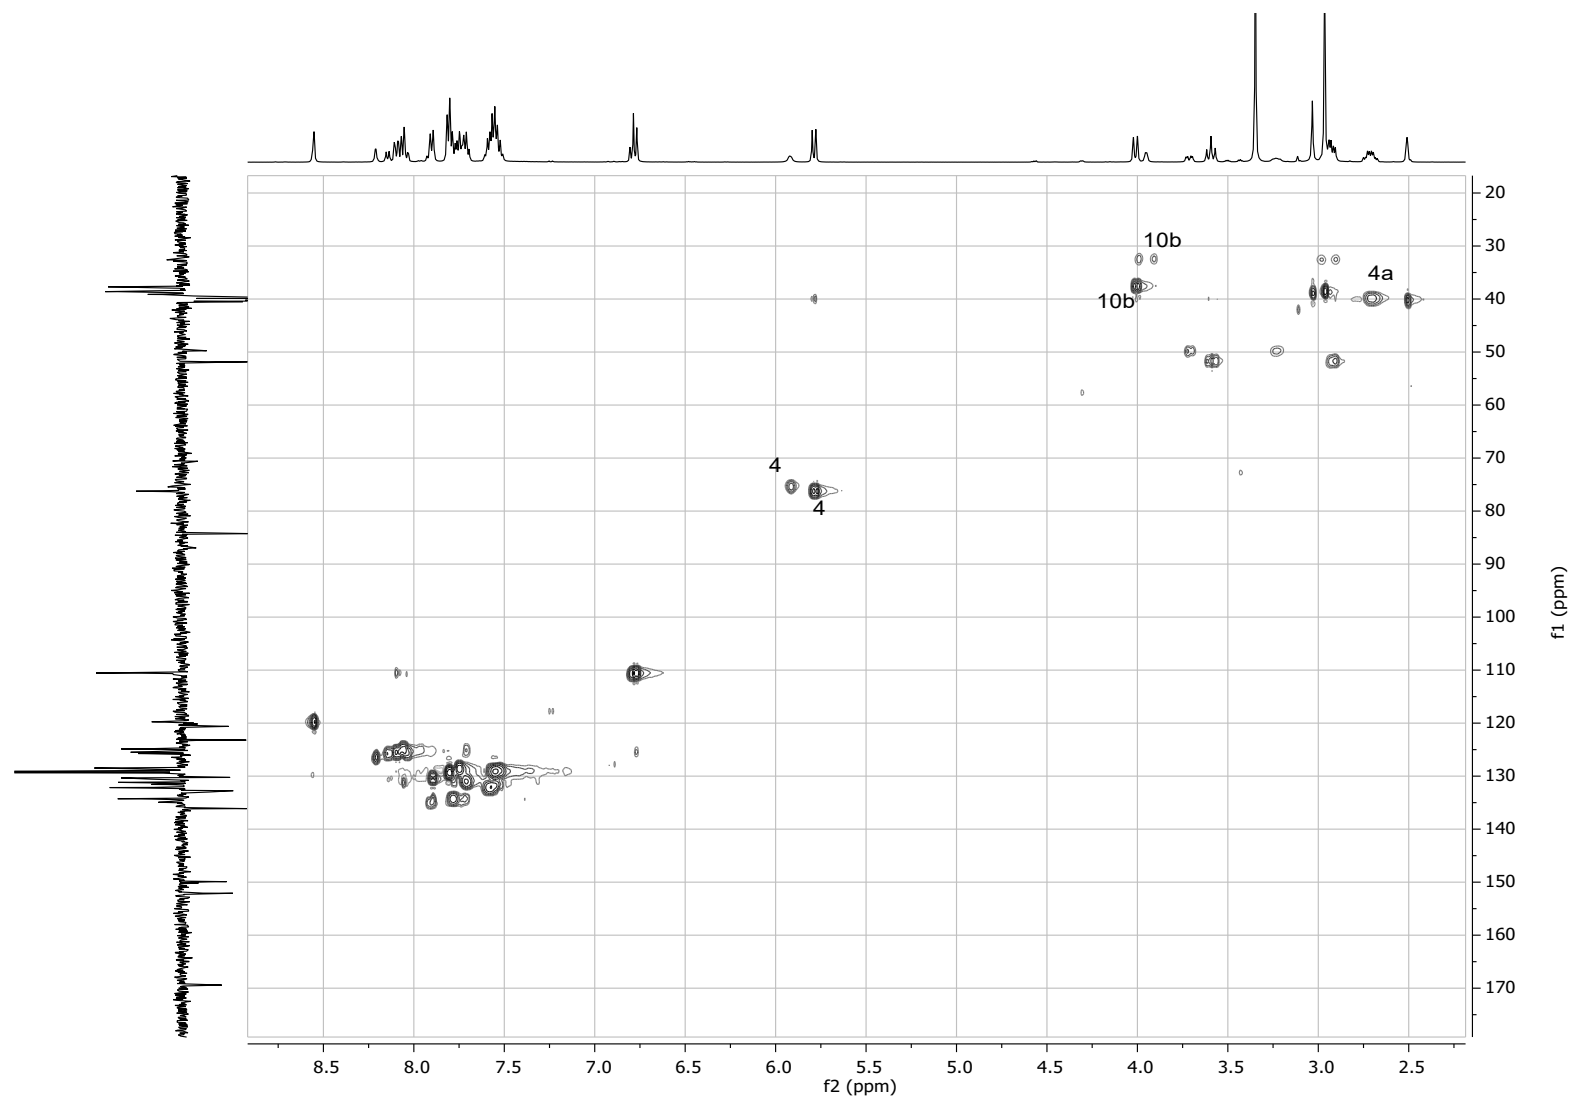

Figure S42. HSQC spectrum of *rac*-(4*R*<sup>\*</sup>,4*aS*<sup>\*</sup>,10*bS*<sup>\*</sup>)-**2ci** and *rac*-(4*R*<sup>\*</sup>,4*aS*<sup>\*</sup>,10*bR*<sup>\*</sup>)-*epi*-**2ci** in DMSO-*d*<sub>6</sub> at 500 MHz.

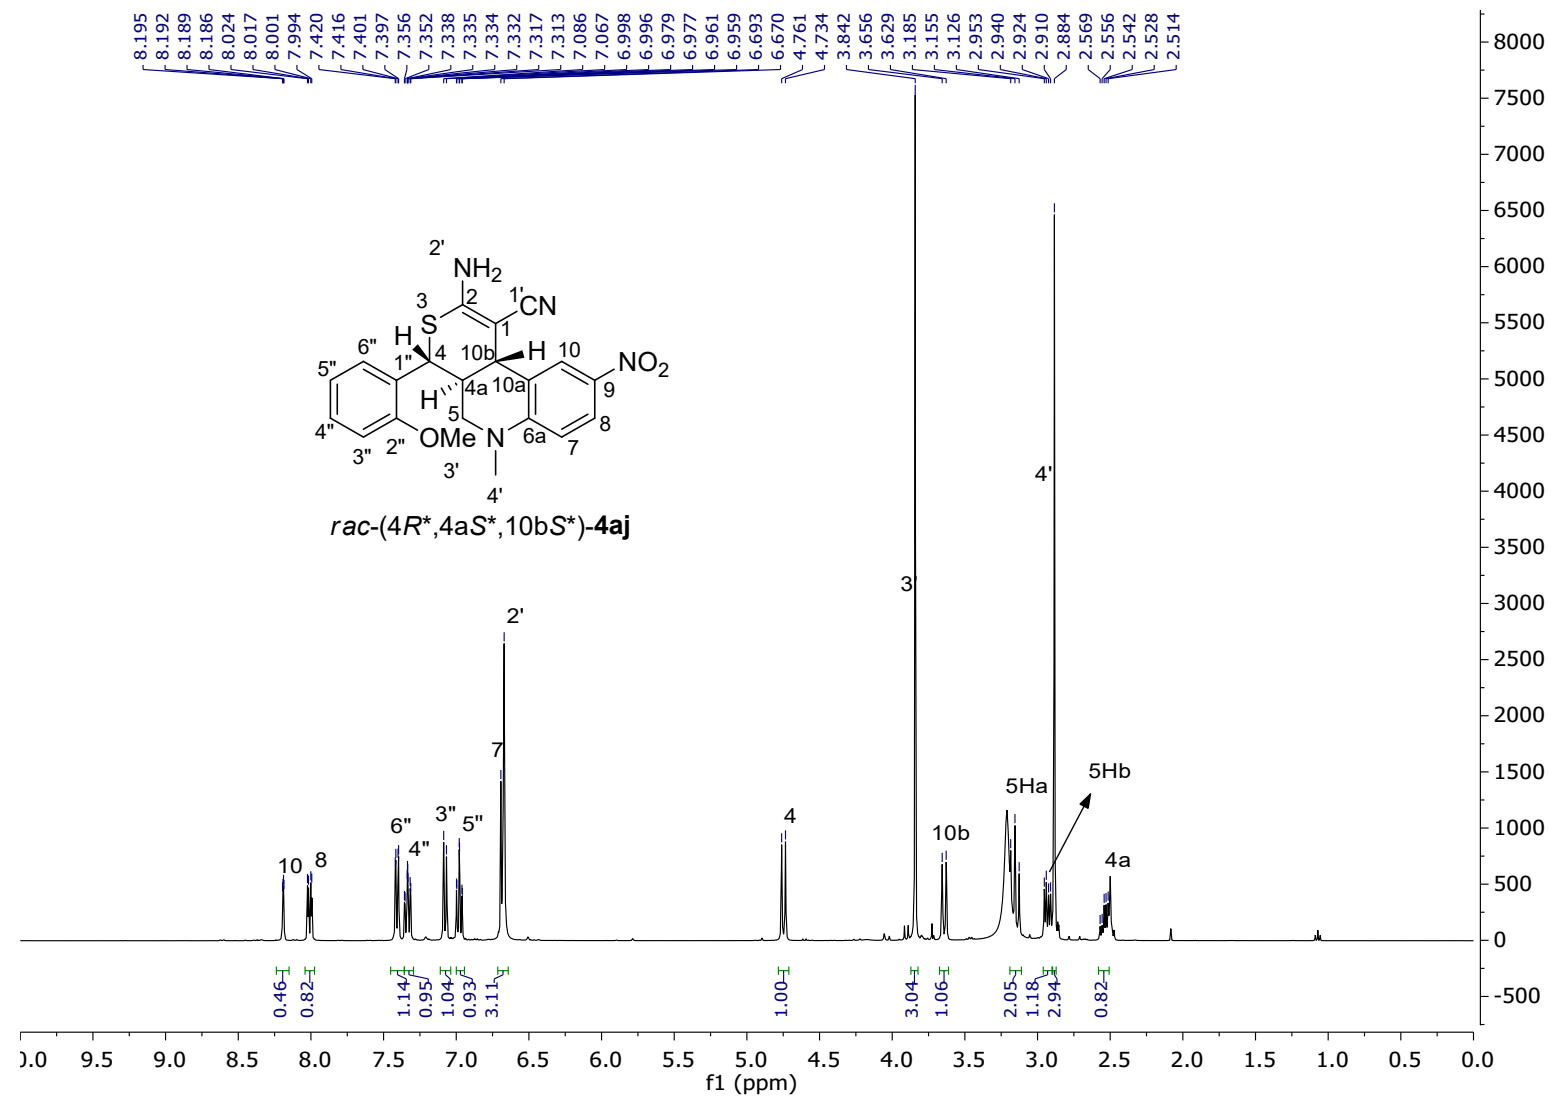

Figure S43. <sup>1</sup>H-NMR spectrum of the *rac*-(4*R*<sup>\*</sup>,4*a**S*<sup>\*</sup>,10*b**S*<sup>\*</sup>)-**4aj** in DMSO-d<sub>6</sub> at 400 MHz.

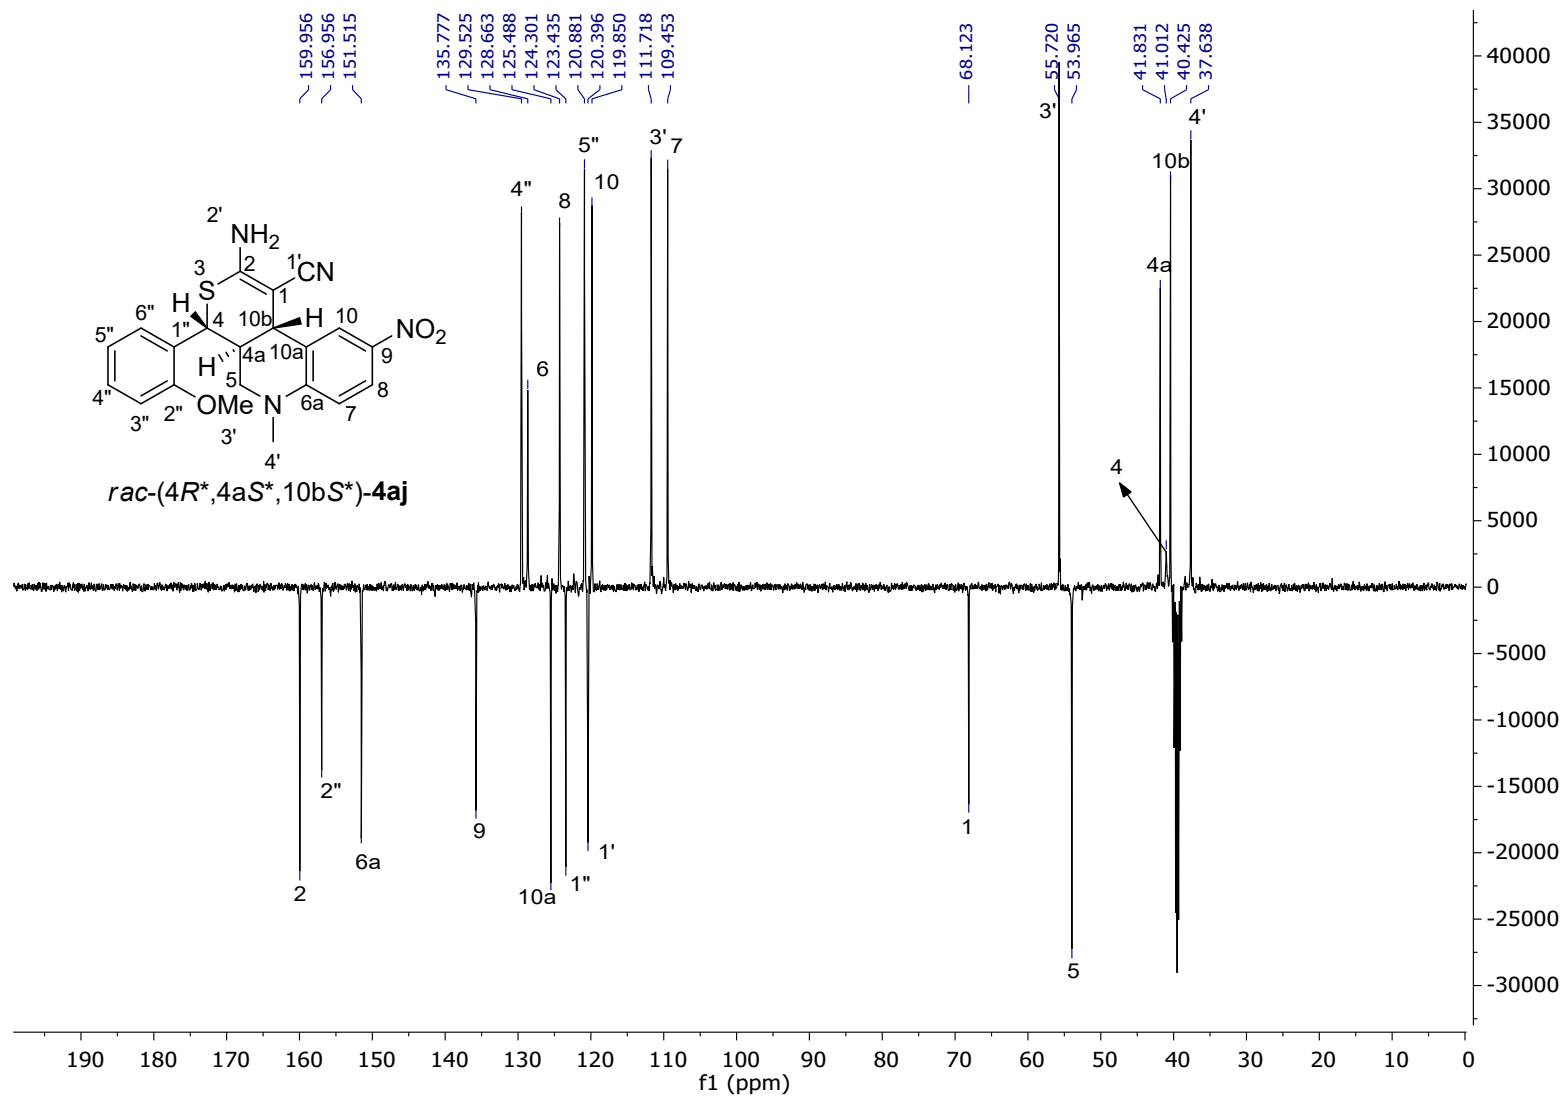

Figure S44. <sup>13</sup>C-NMR spectrum of the *rac*-(4*R*<sup>\*</sup>,4*a*S<sup>\*</sup>,10*b*S<sup>\*</sup>)-**4aj** in DMSO-d<sub>6</sub> at 100 MHz.

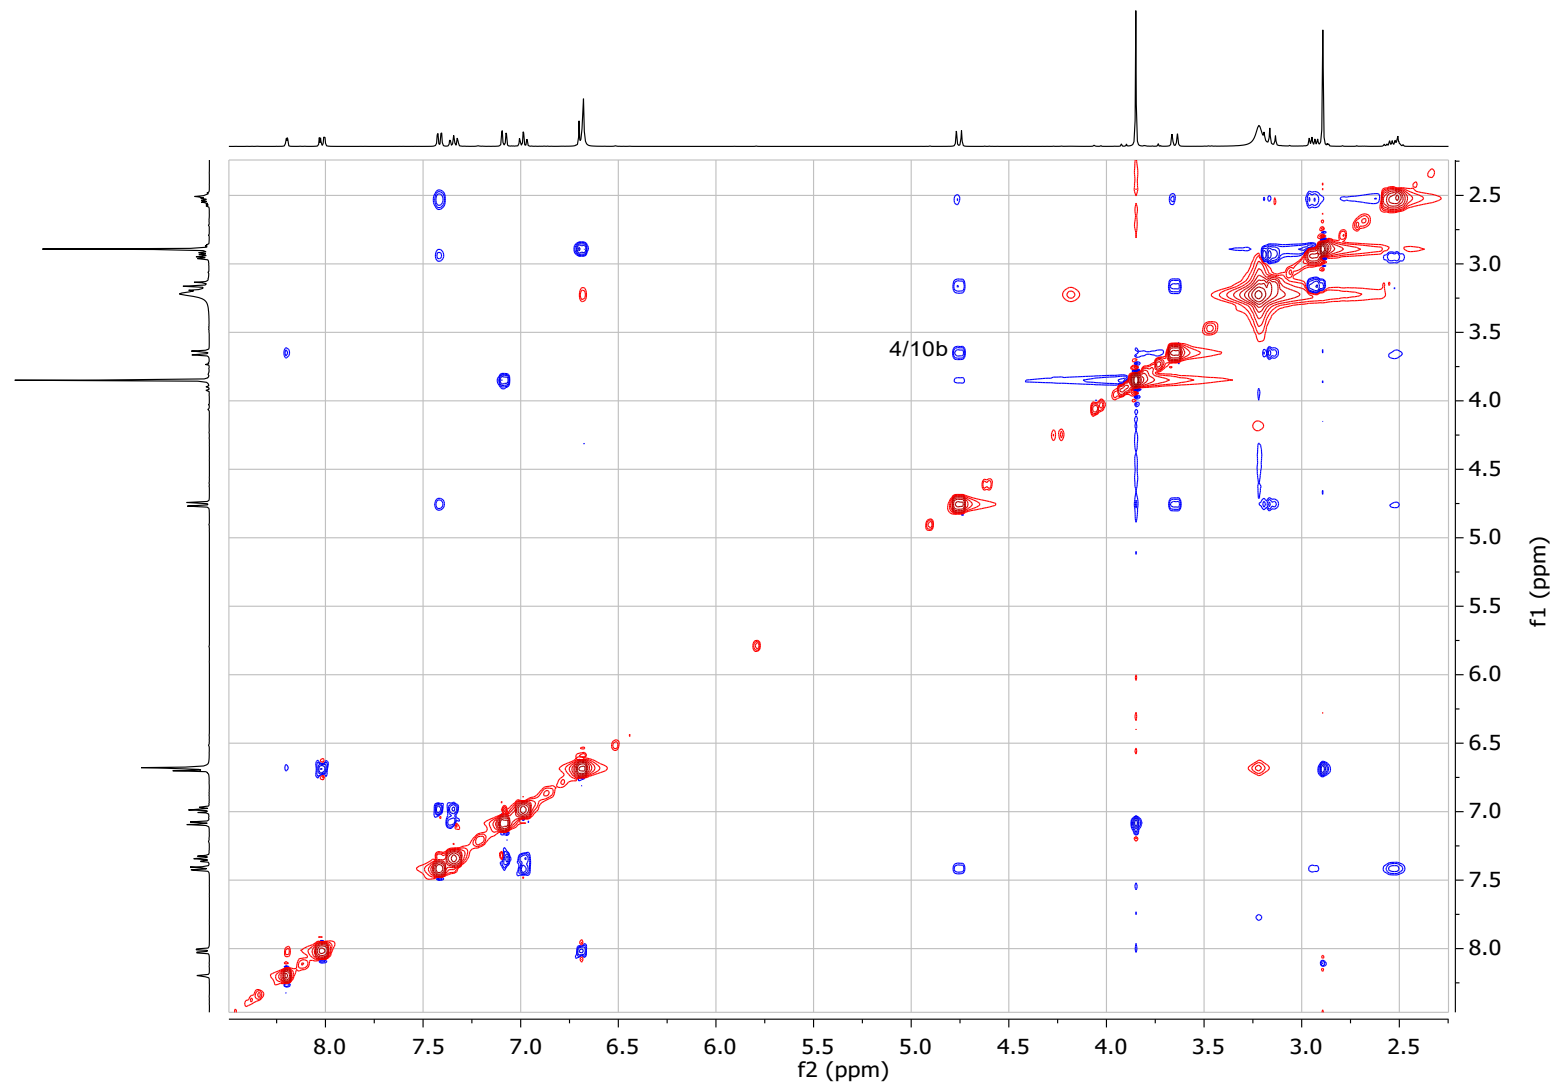

Figure S45. NOESY spectrum of the *rac*-(4*R*<sup>\*</sup>,4*aS*<sup>\*</sup>,10*bS*<sup>\*</sup>)-**4aj** in DMSO-*d*<sub>6</sub> at 400 MHz.

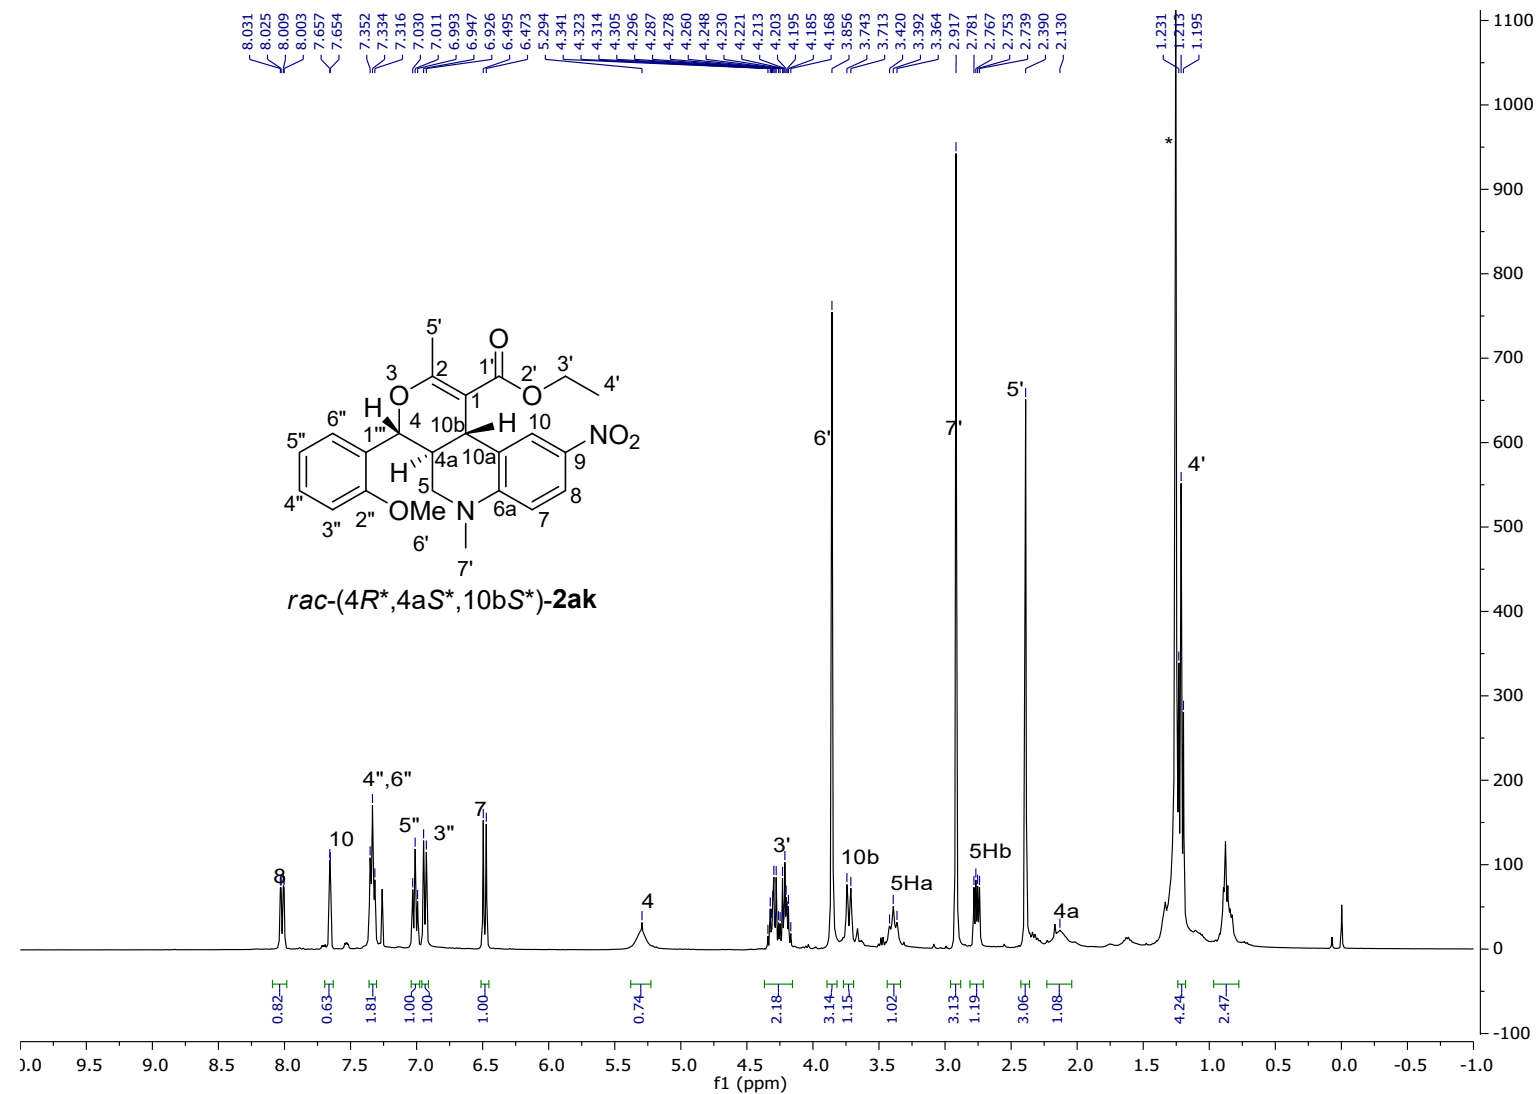

Figure S46. <sup>1</sup>H-NMR spectrum of *rac*-(4*R*\*,4*aS*\*,10*bS*\*)-2*ak* in DMSO-*d*<sub>6</sub> at 500 MHz.



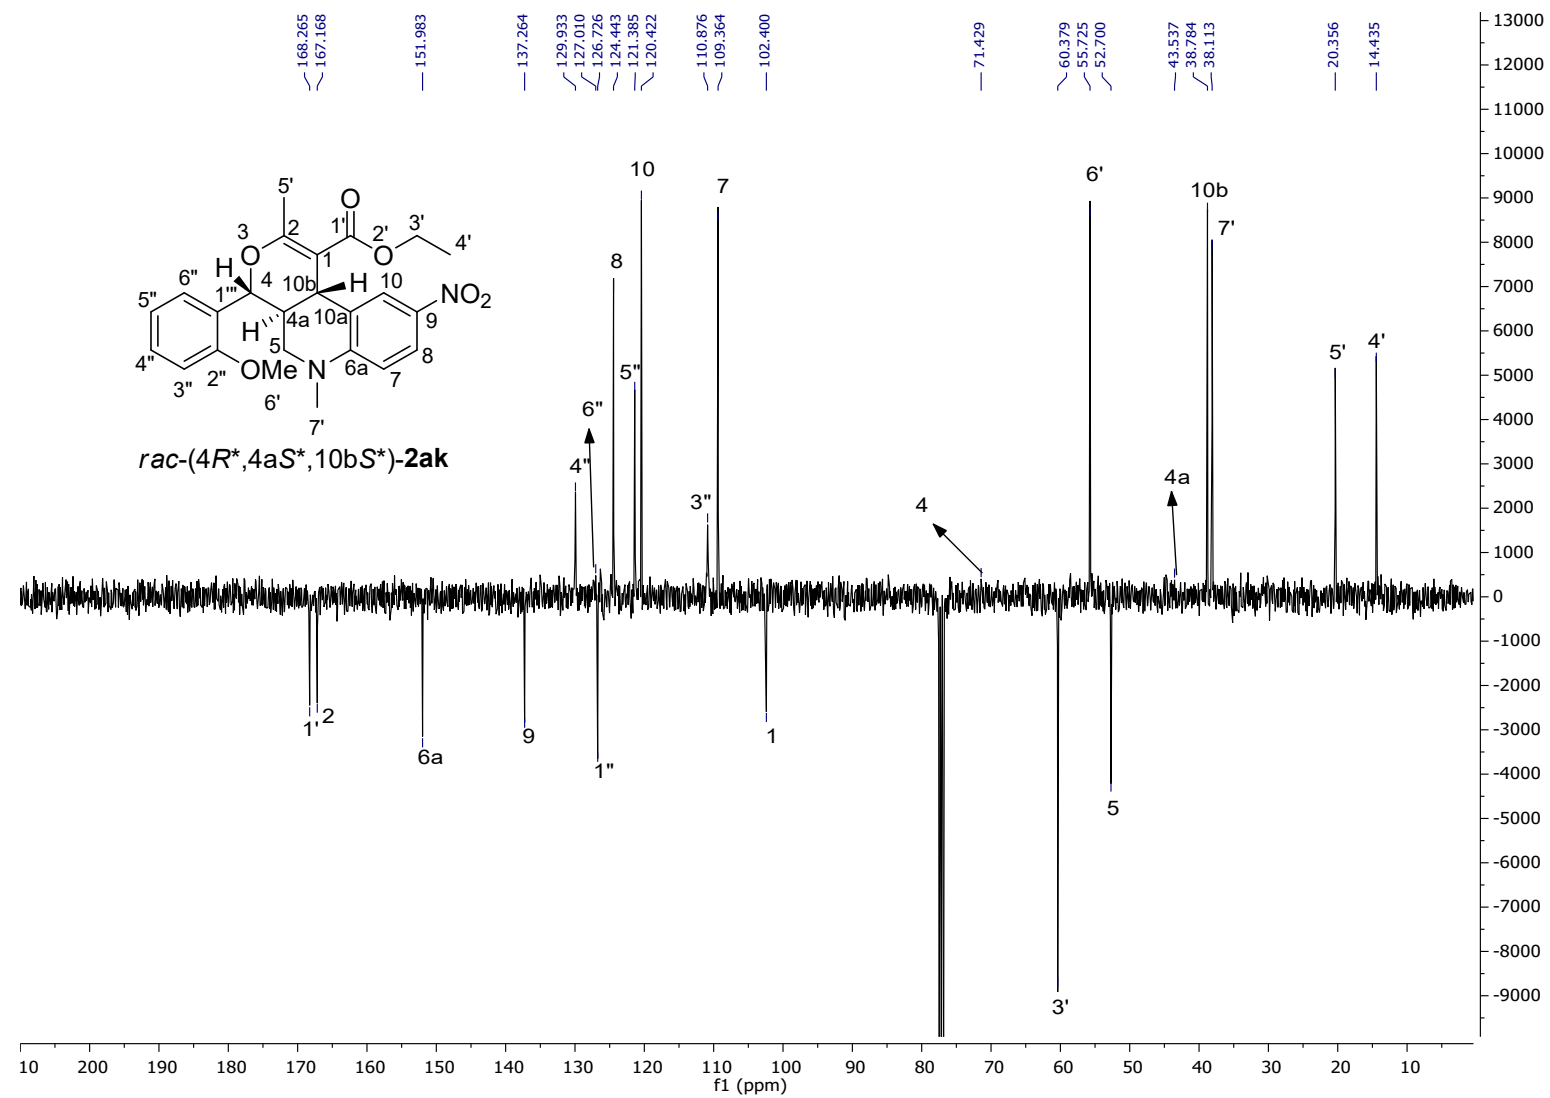

Figure S47. <sup>13</sup>C-NMR spectrum of *rac*-(4*R*<sup>\*</sup>,4*aS*<sup>\*</sup>,10*bS*<sup>\*</sup>)-**2ak** in CDCl<sub>3</sub> at 100 MHz.

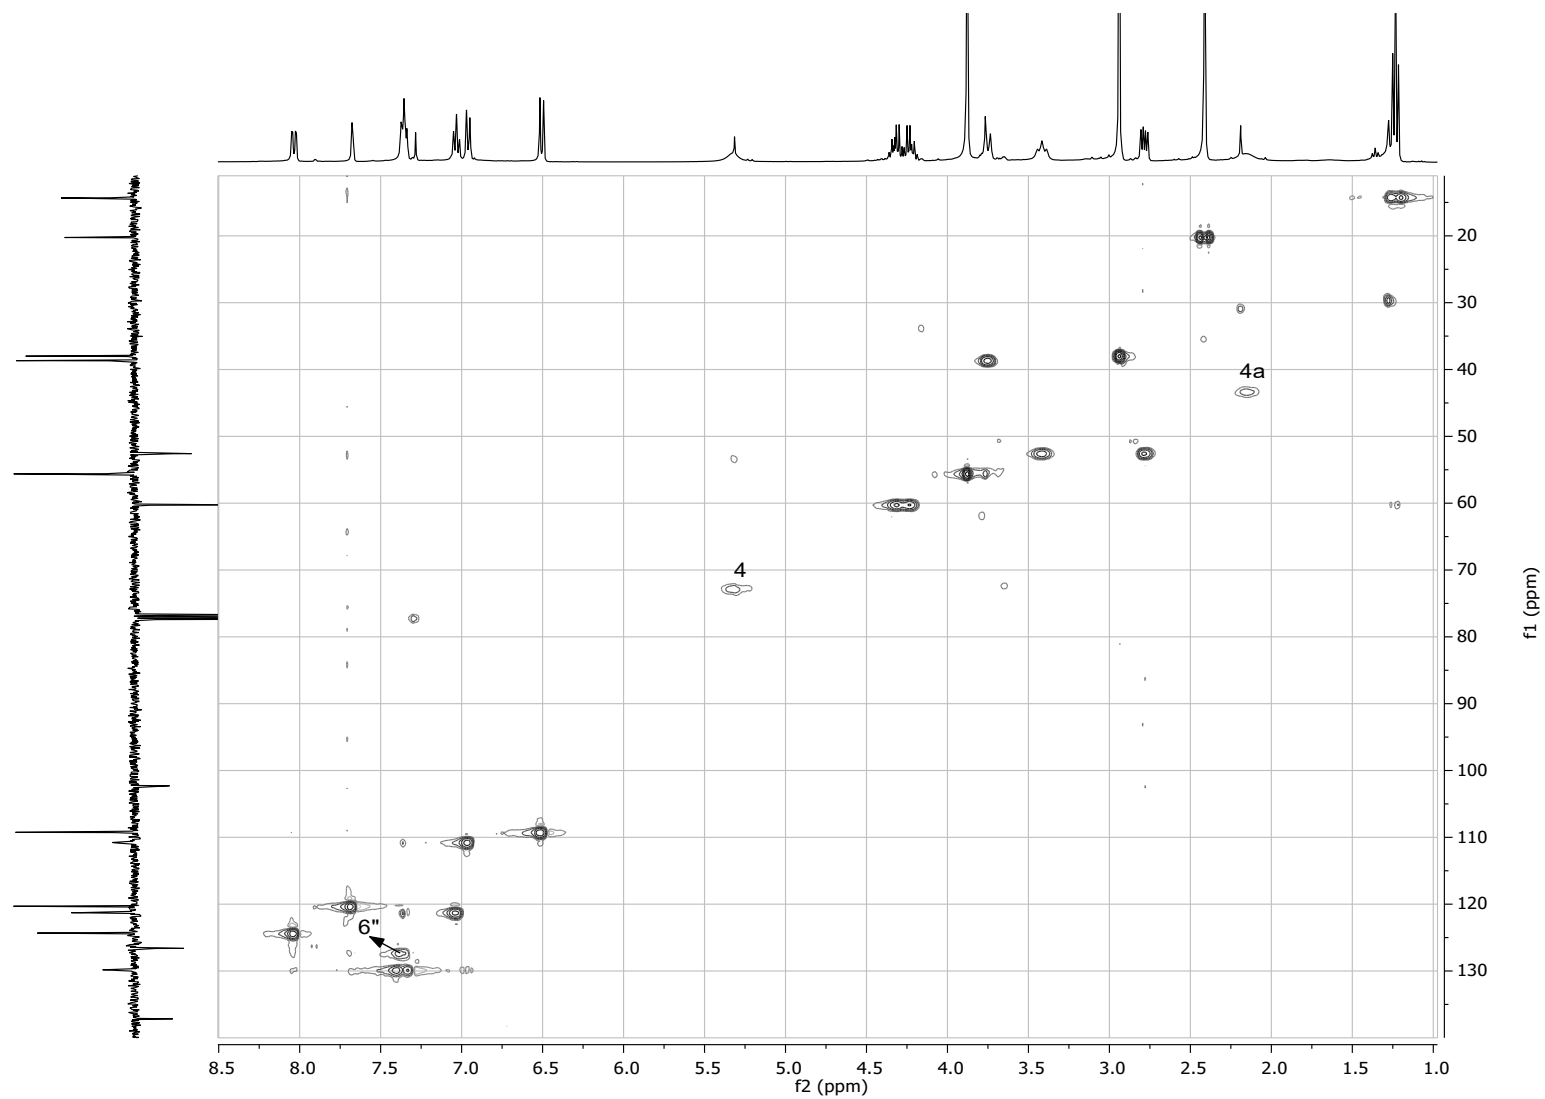

Figure S48. HSQC spectrum of *rac*-(4*R*\*,4*aS*\*,10*bS*\*)-2*ak* in CDCl<sub>3</sub> at 400 MHz.

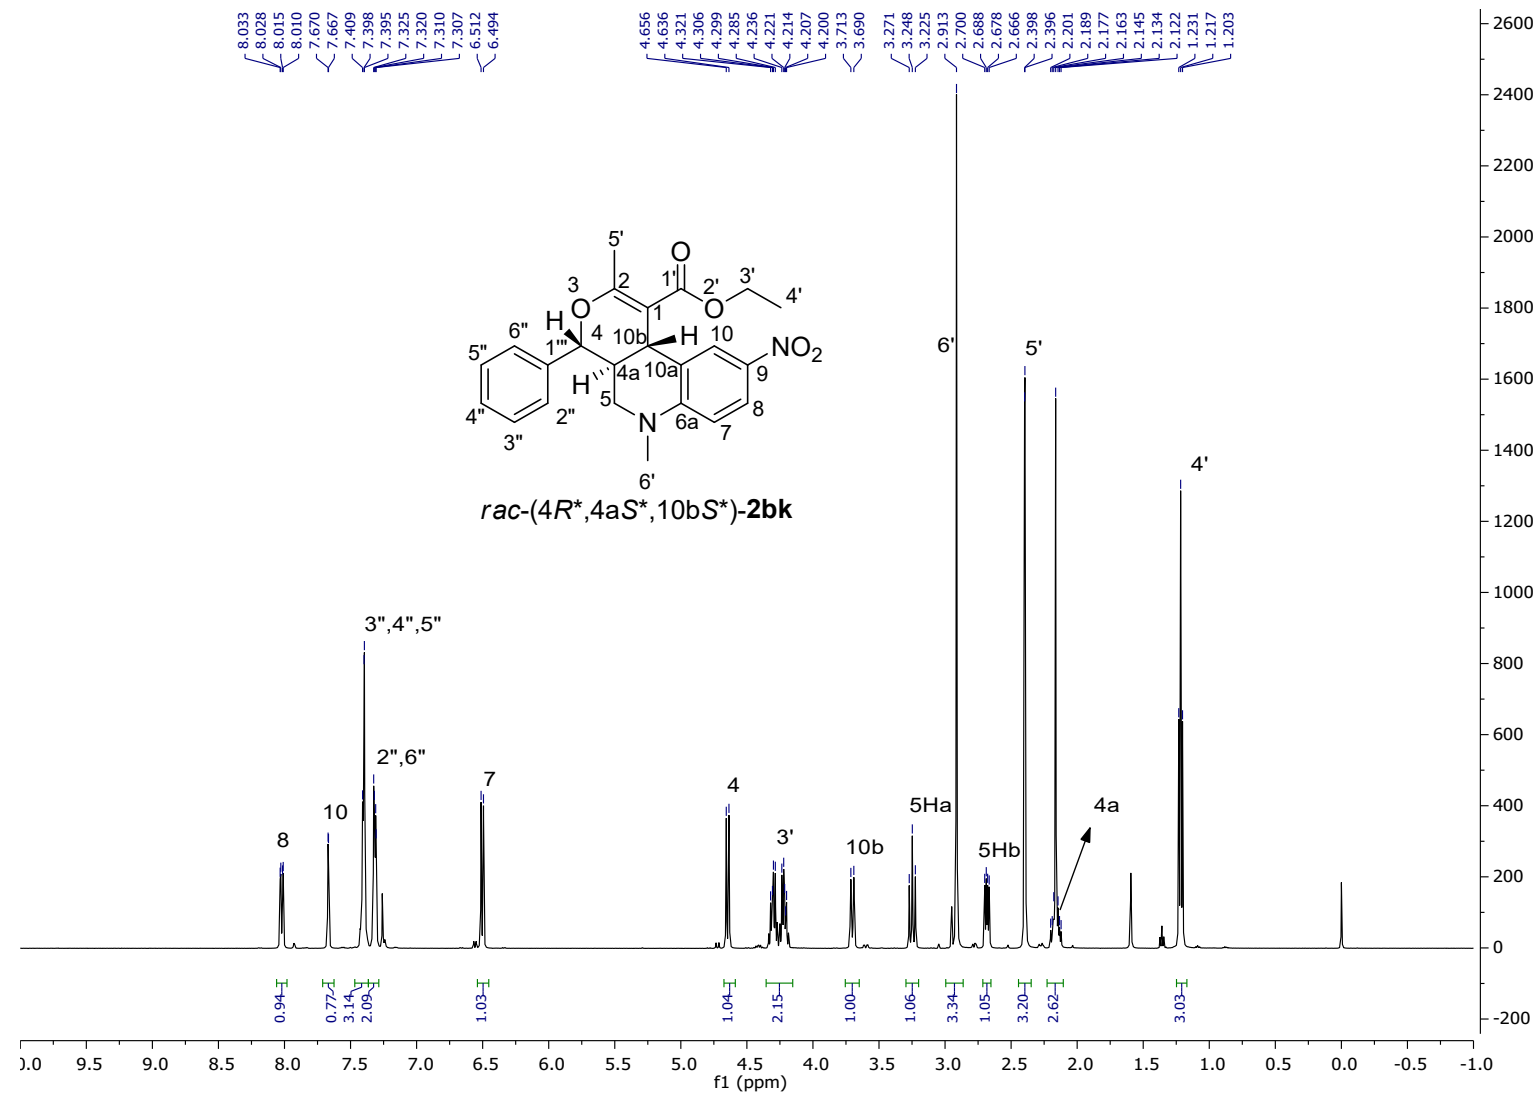

Figure S49. <sup>1</sup>H-NMR spectrum of *rac*-(4*R*<sup>\*</sup>,4*a**S*<sup>\*</sup>,10*b**S*<sup>\*</sup>)-**2bk** in CDCl<sub>3</sub> at 500 MHz.

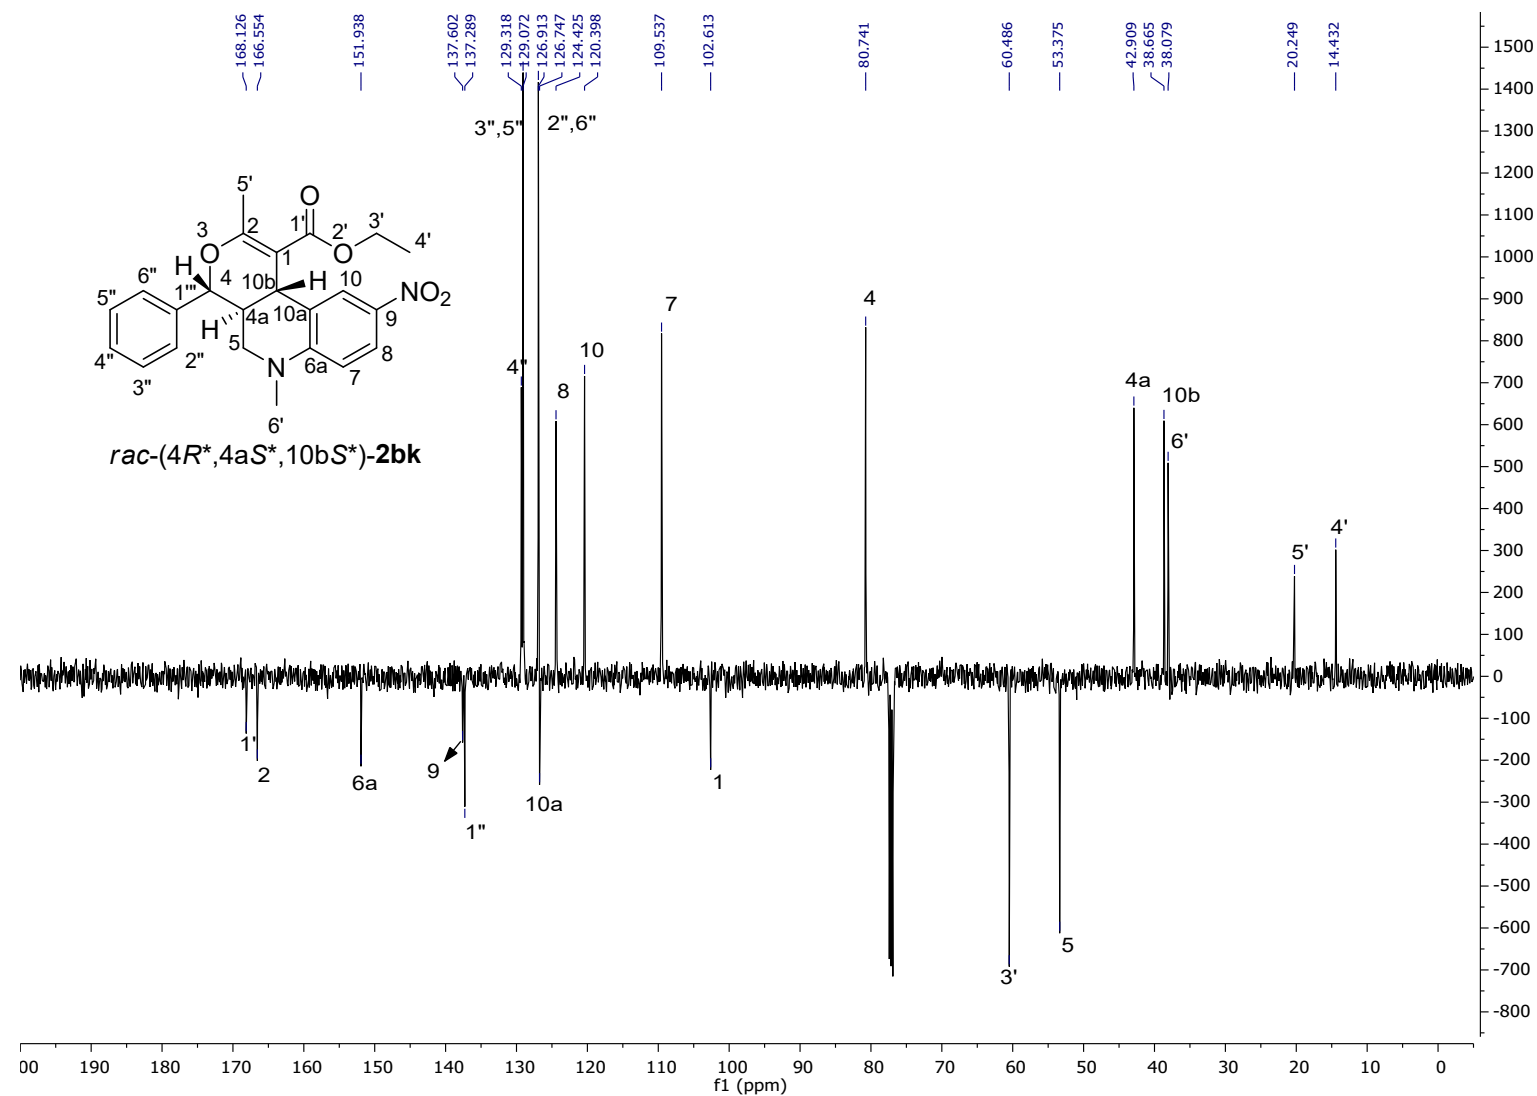

Figure S50. <sup>13</sup>C-NMR spectrum of *rac*-(4*R*\*,4*aS*\*,10*bS*\*)-**2bk** in CDCl<sub>3</sub> at 125 MHz.

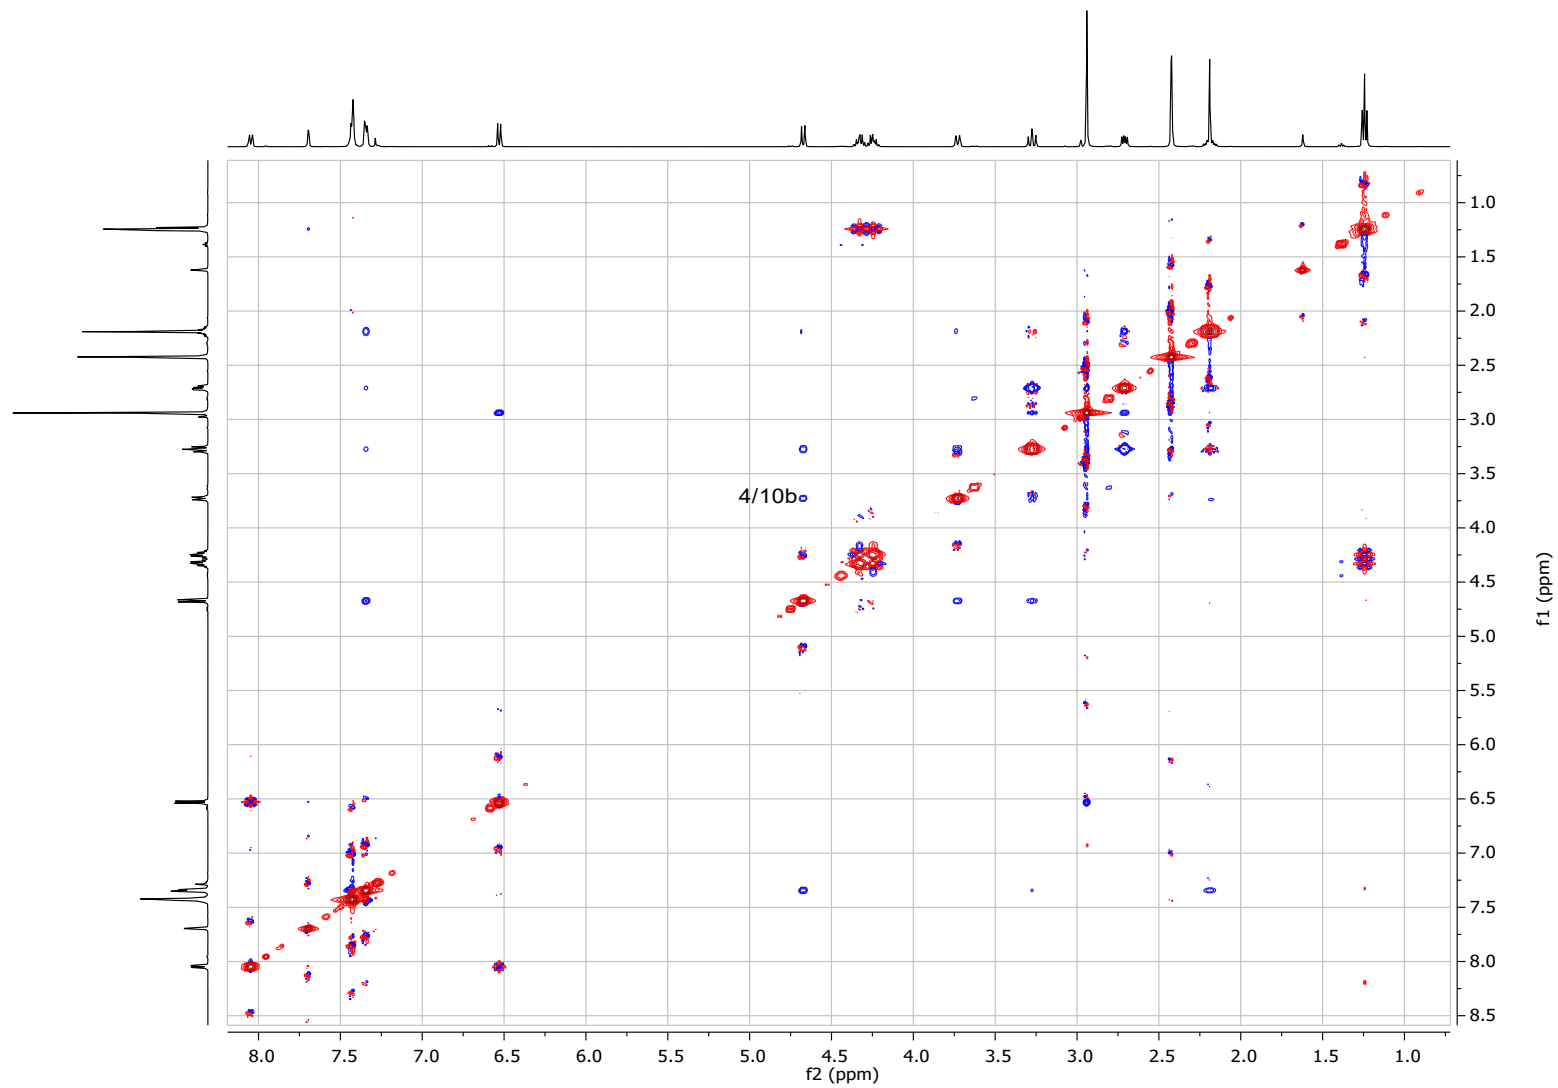

Figure S51. NOESY spectrum of *rac*-(4*R*<sup>\*</sup>,4*aS*<sup>\*</sup>,10*bS*<sup>\*</sup>)-**2bk** in CDCl<sub>3</sub> at 500 MHz.

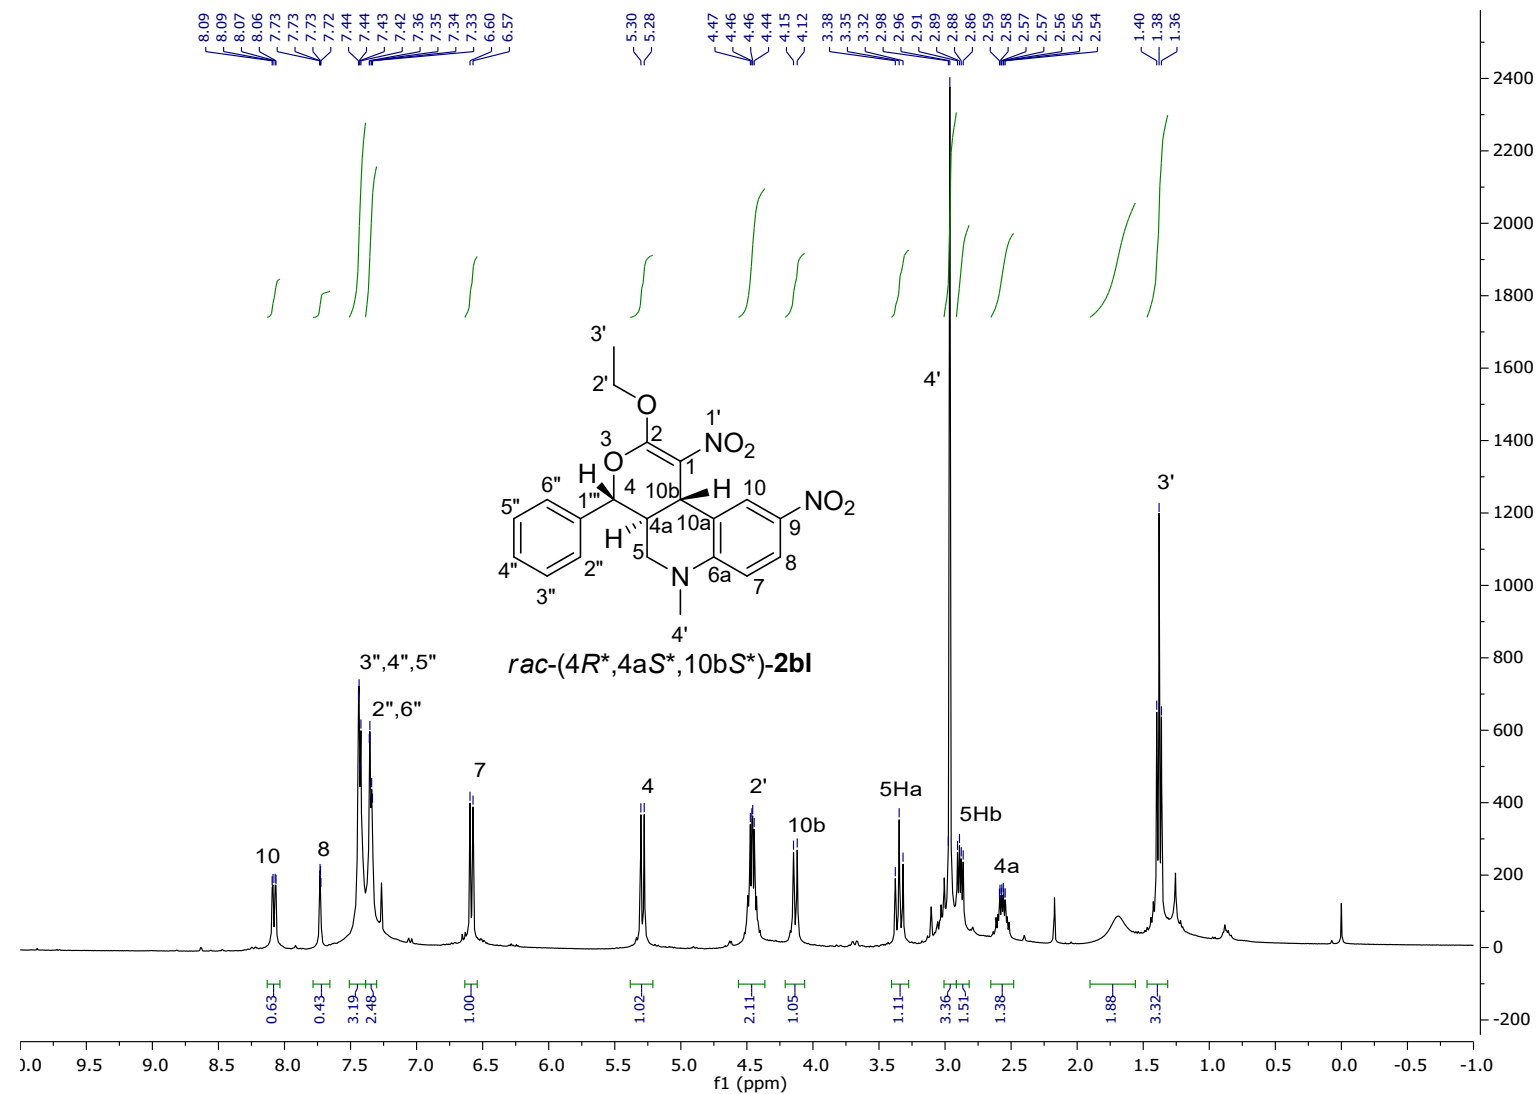

Figure S52. <sup>1</sup>H-NMR spectrum of *rac*-(4*R*<sup>\*</sup>,4*a**S*<sup>\*</sup>,10*b**S*<sup>\*</sup>)-**2bl** in CDCl<sub>3</sub> at 400 MHz.

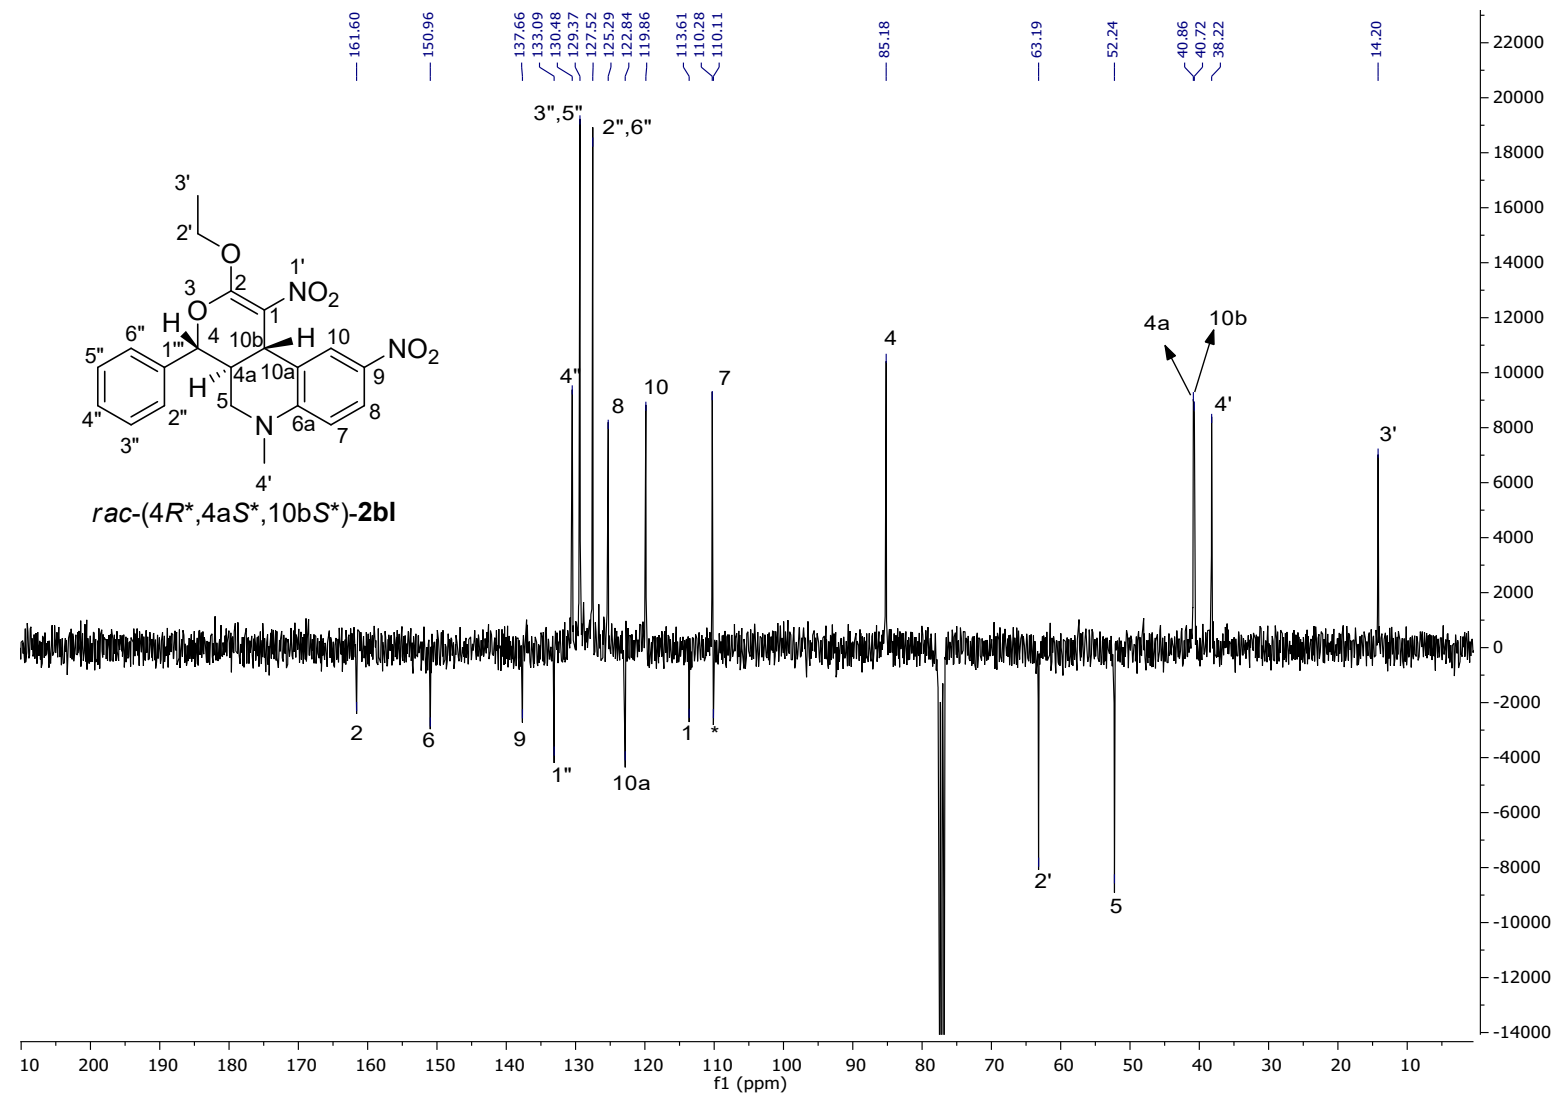

Figure S53. <sup>13</sup>C-NMR spectrum of *rac*-(4*R*<sup>\*</sup>,4*aS*<sup>\*</sup>,10*bS*<sup>\*</sup>)-**2bl** in CDCl<sub>3</sub> at 100 MHz.

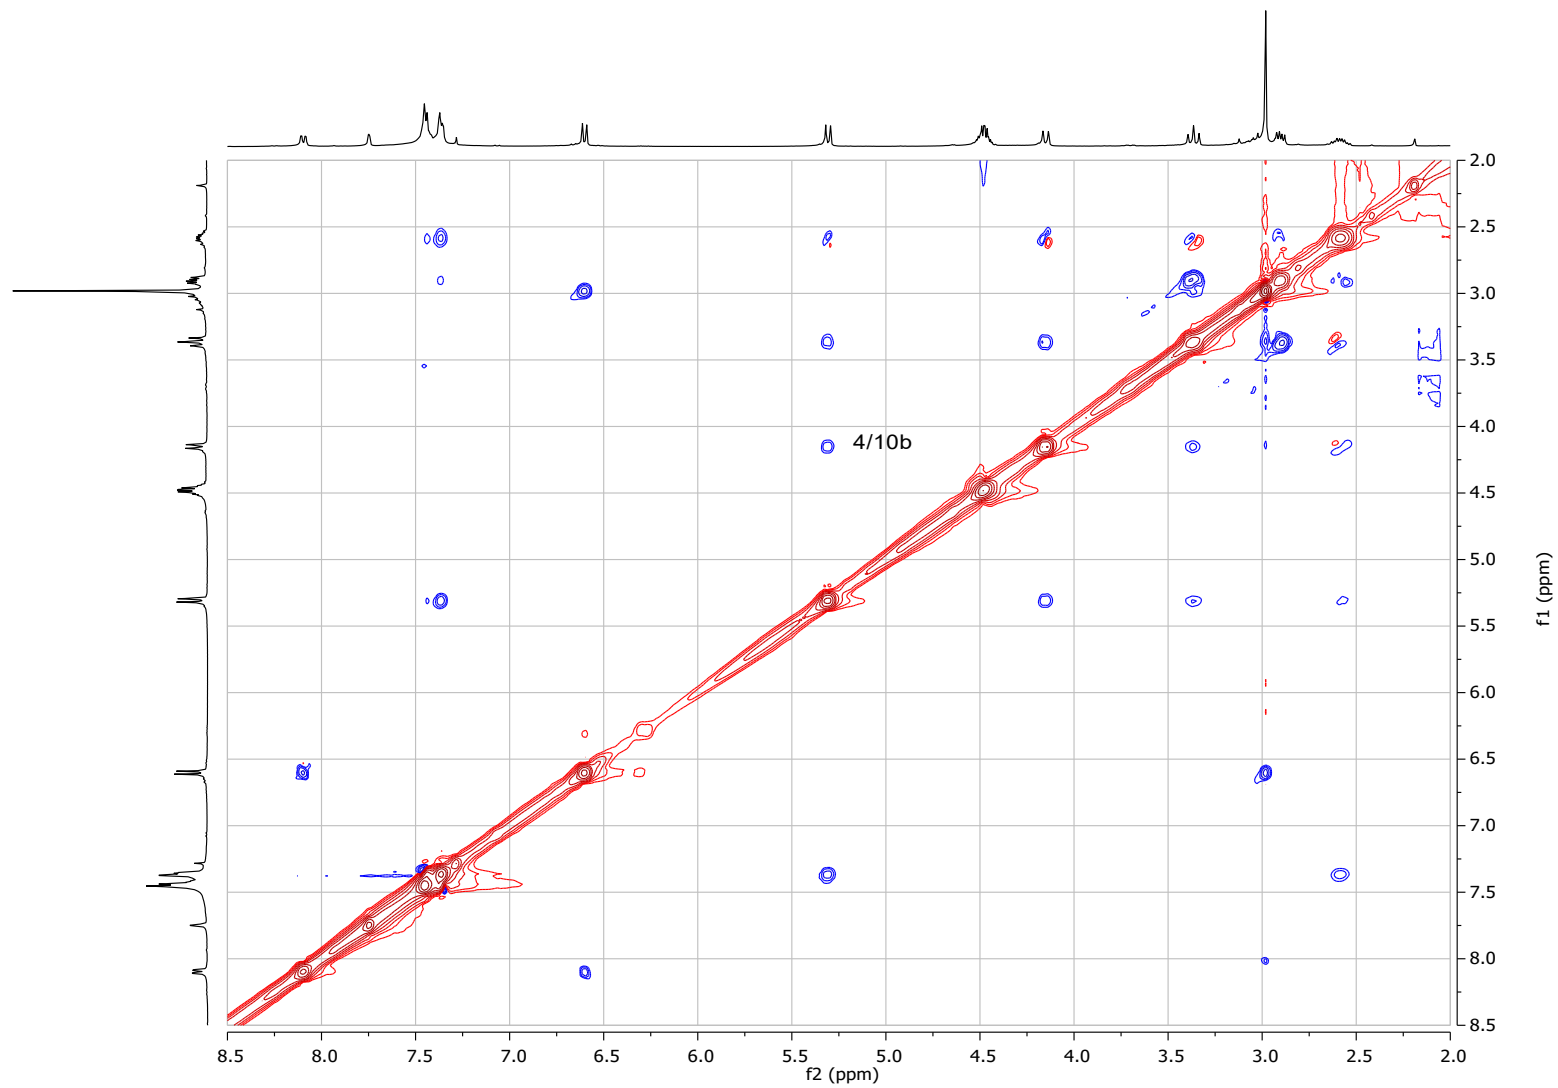

Figure S54. NOESY spectrum of *rac*-(4*R*<sup>\*</sup>,4*aS*<sup>\*</sup>,10*bS*<sup>\*</sup>)-**2bl** in CDCl<sub>3</sub> at 400 MHz.



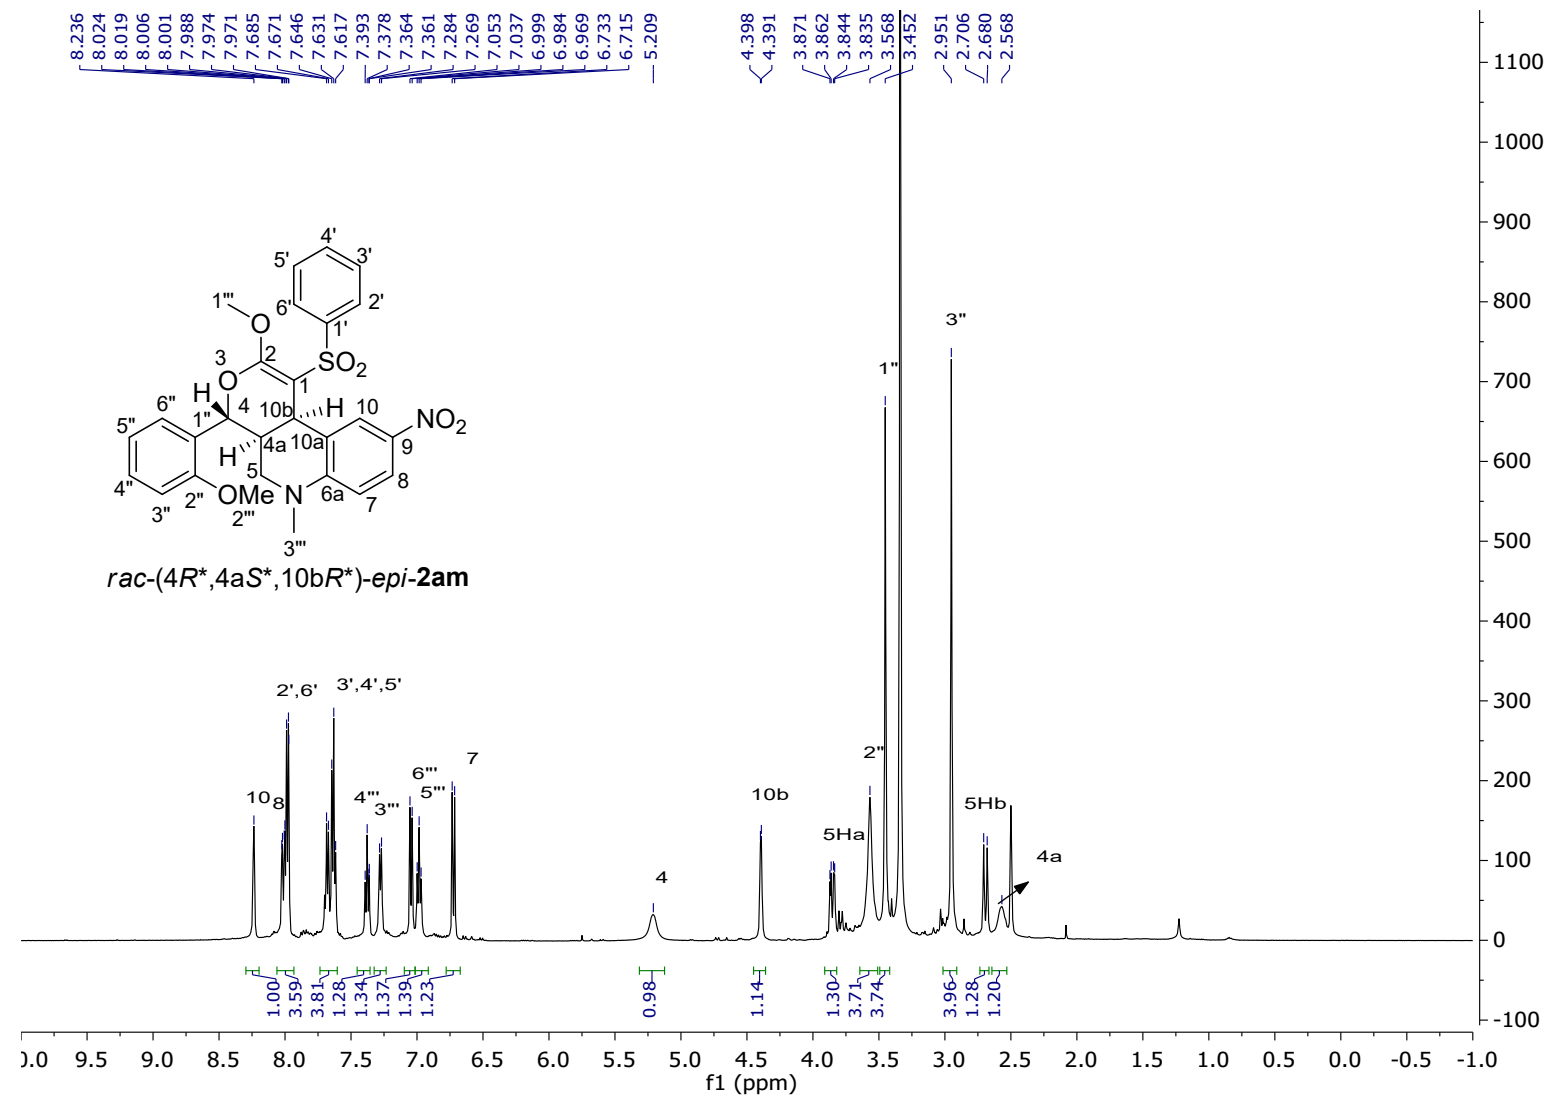

Figure S55. <sup>1</sup>H-NMR spectrum of *rac*-(4*R*<sup>\*</sup>,4*aS*<sup>\*</sup>,10*bR*<sup>\*</sup>)-*epi*-**2am** in DMSO-d<sub>6</sub> at 500 MHz.

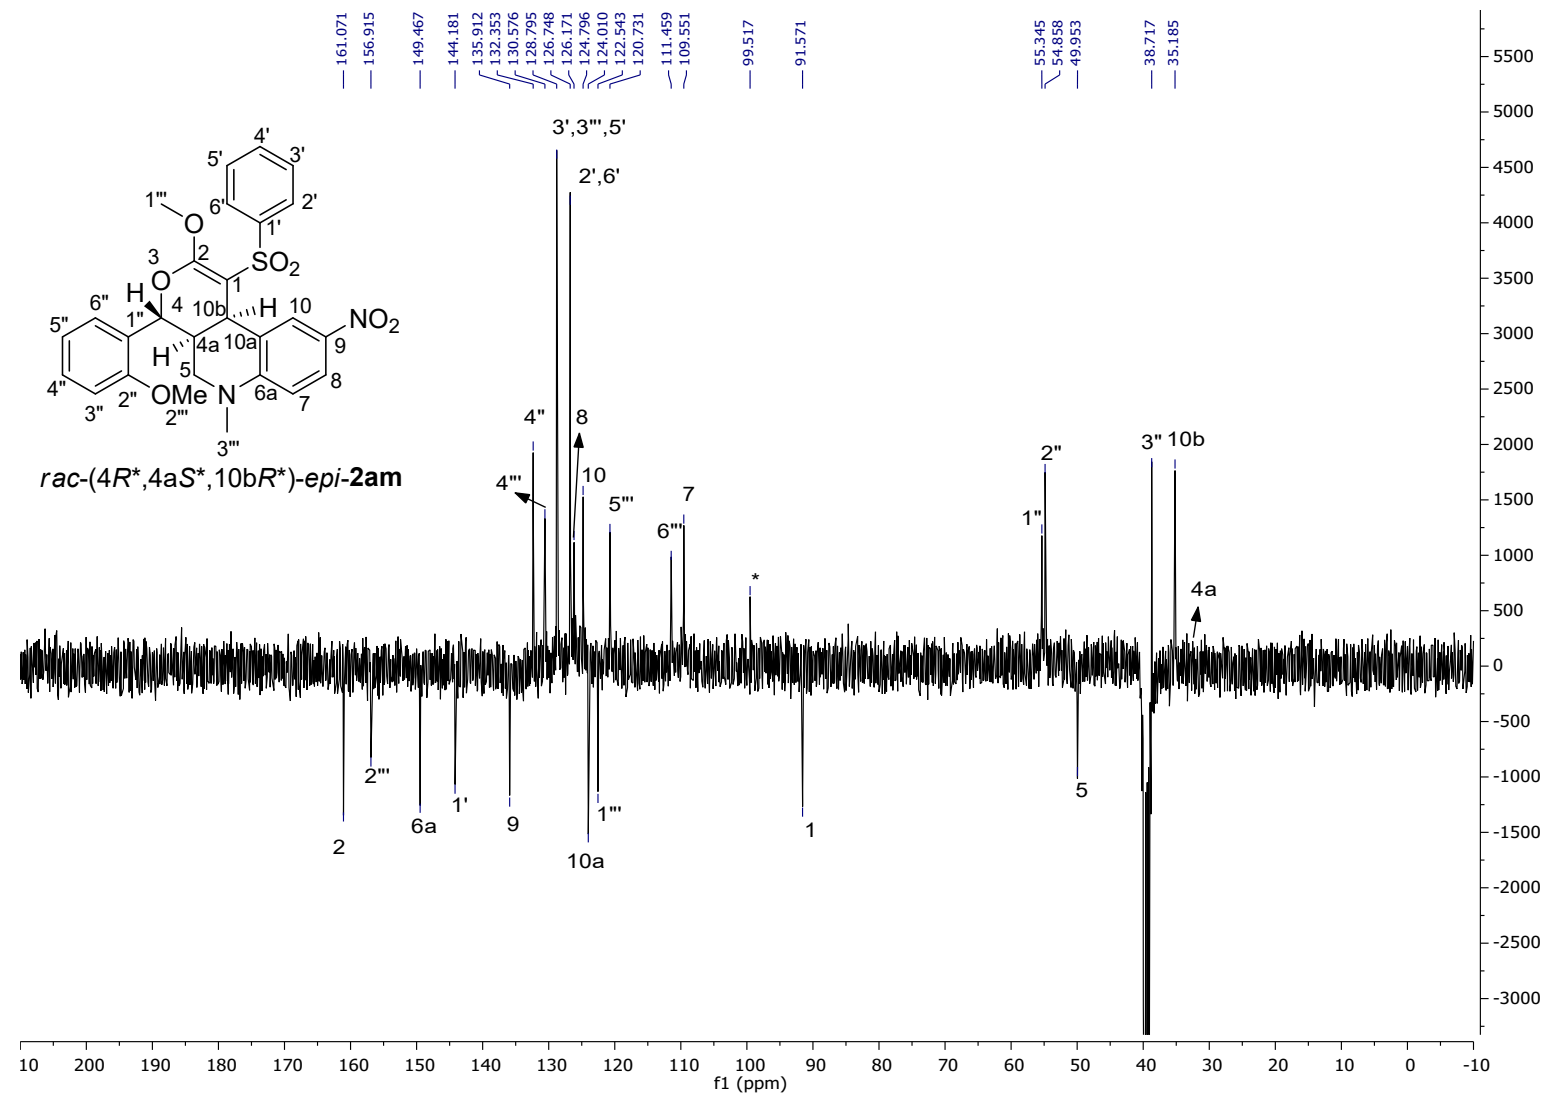

Figure S56. <sup>13</sup>C-NMR spectrum of *rac*-(4*R*<sup>\*</sup>,4*aS*<sup>\*</sup>,10*bR*<sup>\*</sup>)-*epi*-2*am* in DMSO-d<sub>6</sub> at 90 MHz.

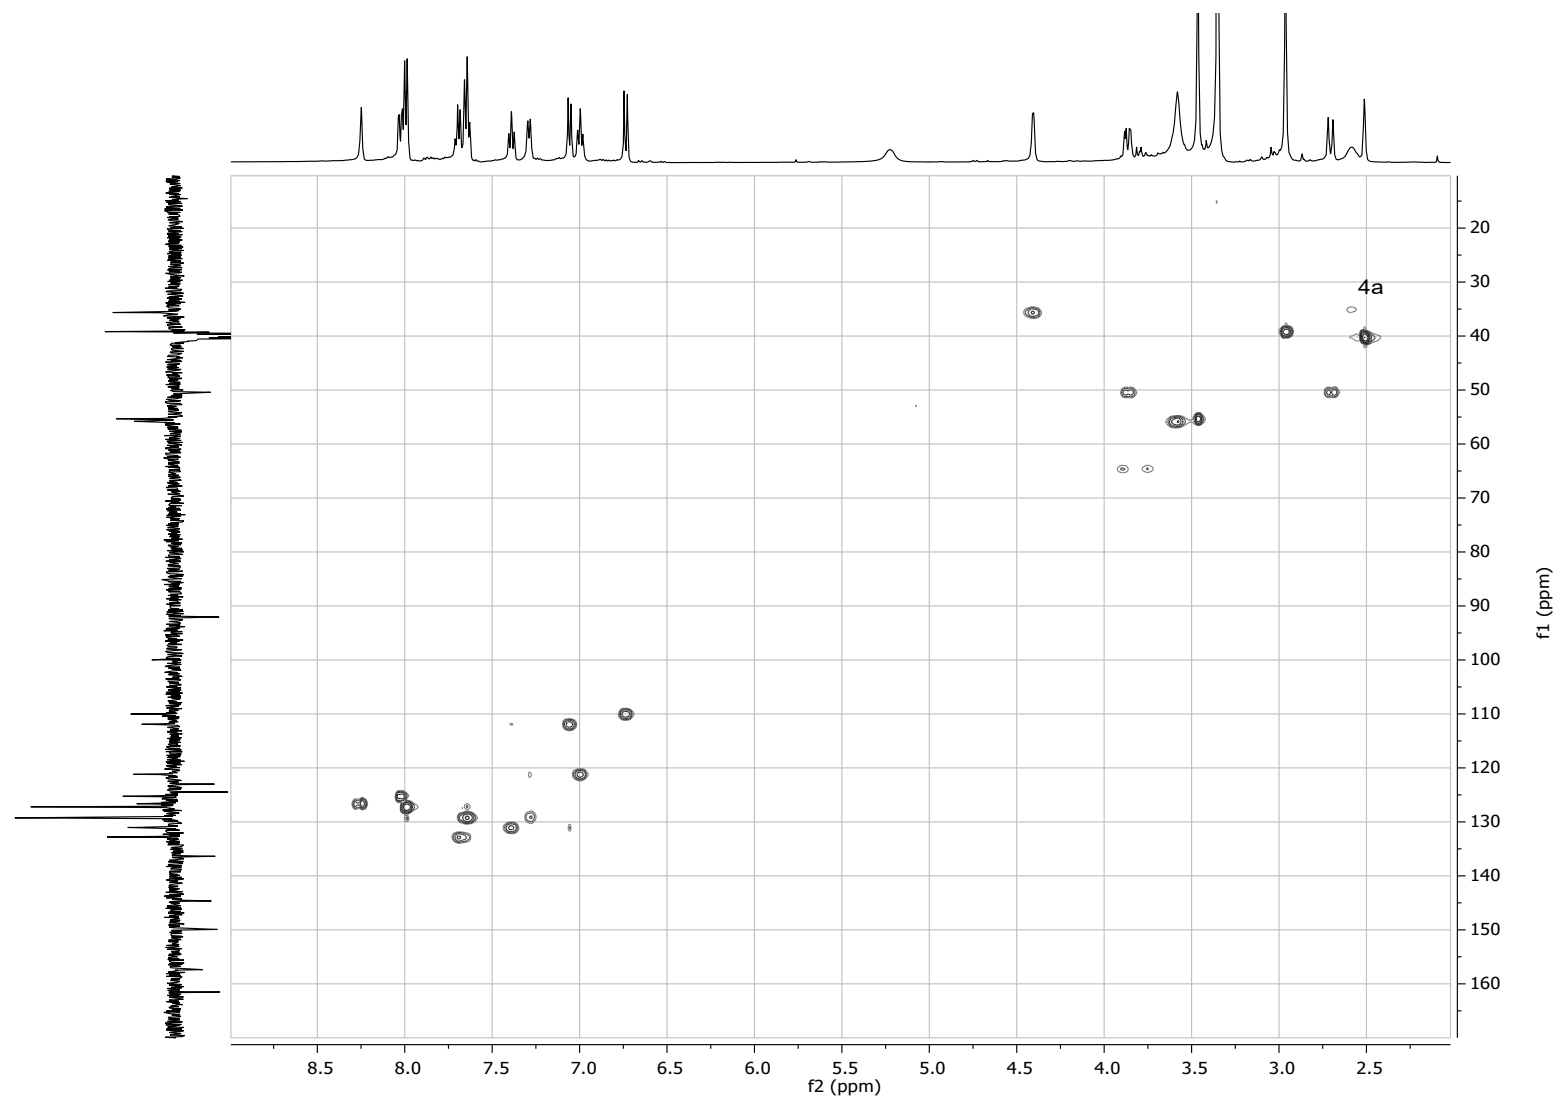

Figure S57. HSQC spectrum of *rac*-(4*R*<sup>\*</sup>,4*aS*<sup>\*</sup>,10*bR*<sup>\*</sup>)-*epi*-**2am** in DMSO-*d*<sub>6</sub> at 400 MHz.

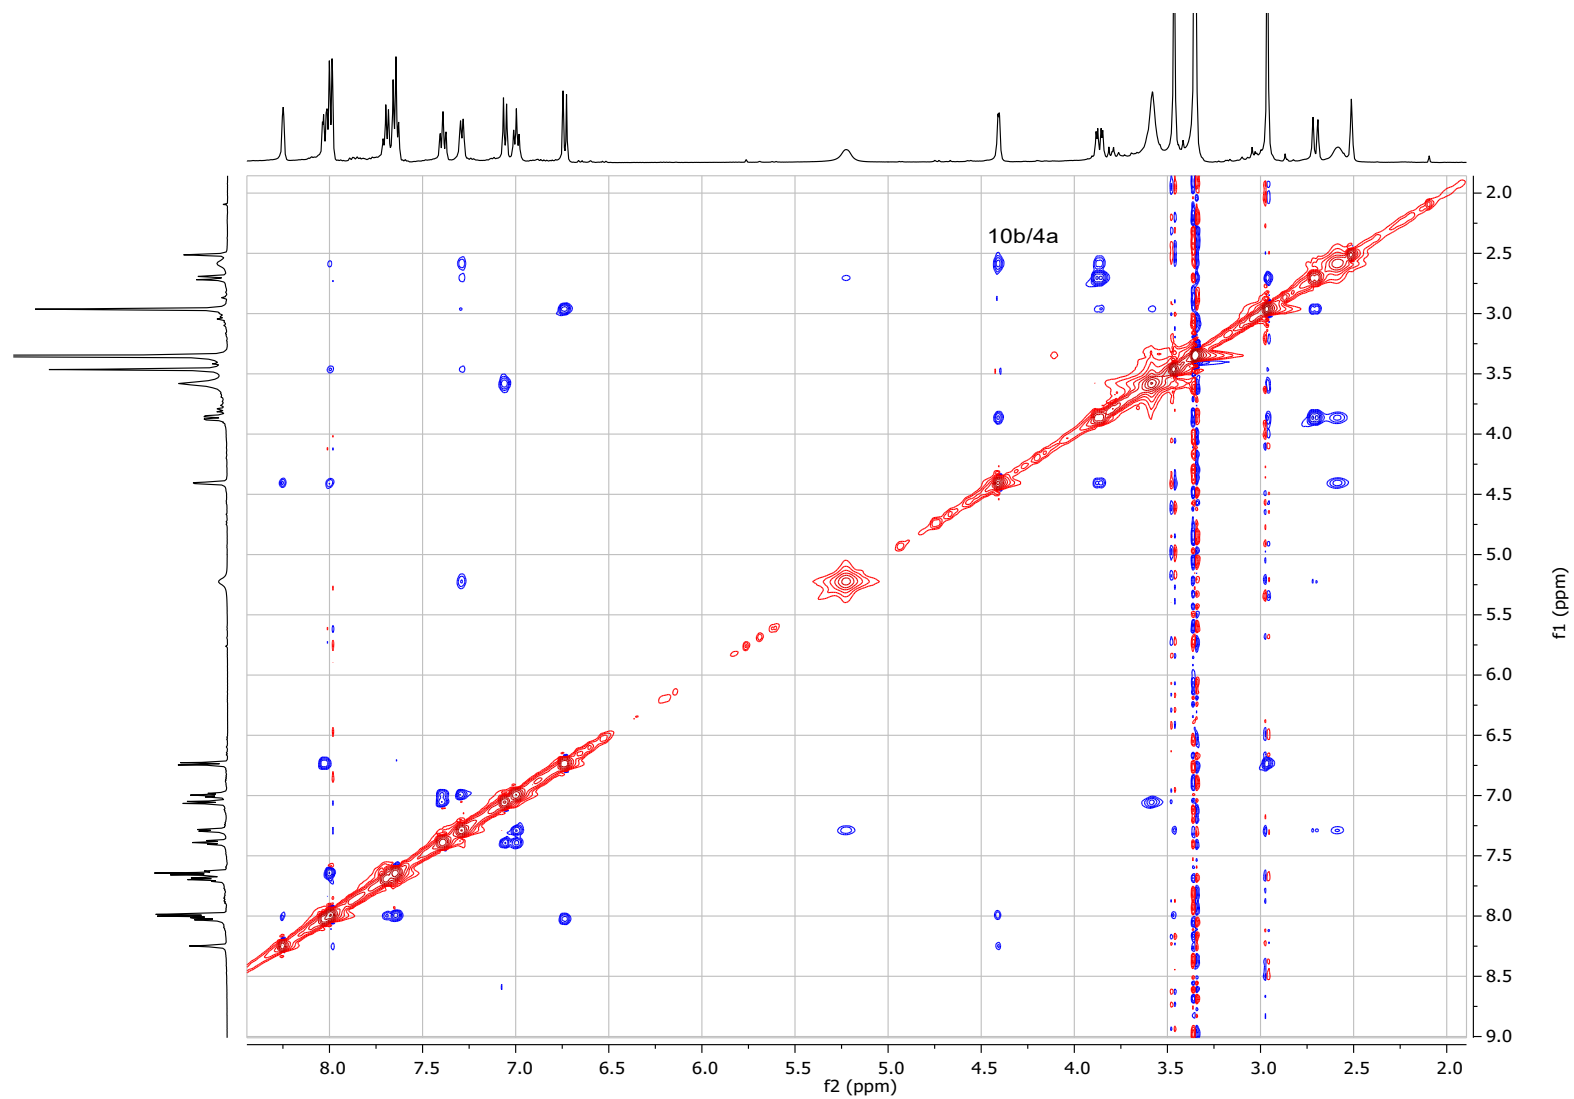

Figure S58. ROESY spectrum of *rac*-(4*R*<sup>\*</sup>,4*aS*<sup>\*</sup>,10*bR*<sup>\*</sup>)-*epi*-**2am** in DMSO-*d*<sub>6</sub> at 500 MHz.

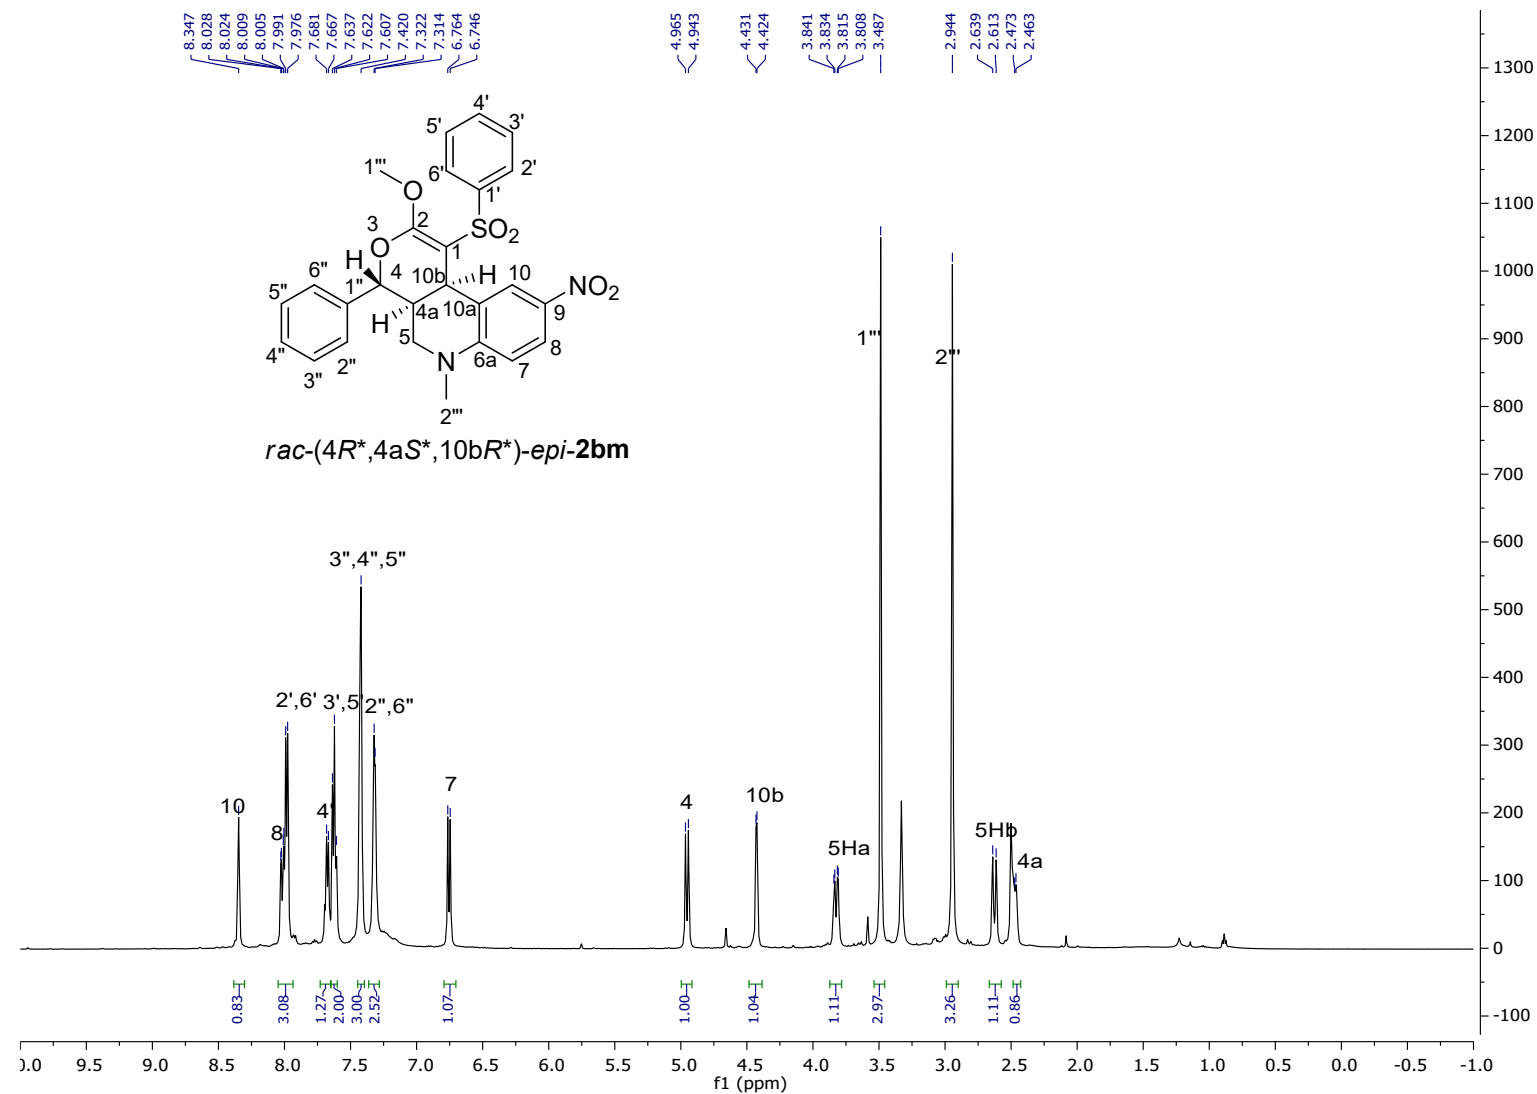

Figure S59. <sup>1</sup>H-NMR spectrum of *rac*-(4*R*<sup>\*</sup>,4*a**S*<sup>\*</sup>,10*b**R*<sup>\*</sup>)-*epi*-2**bm** in DMSO-d<sub>6</sub> at 500 MHz.

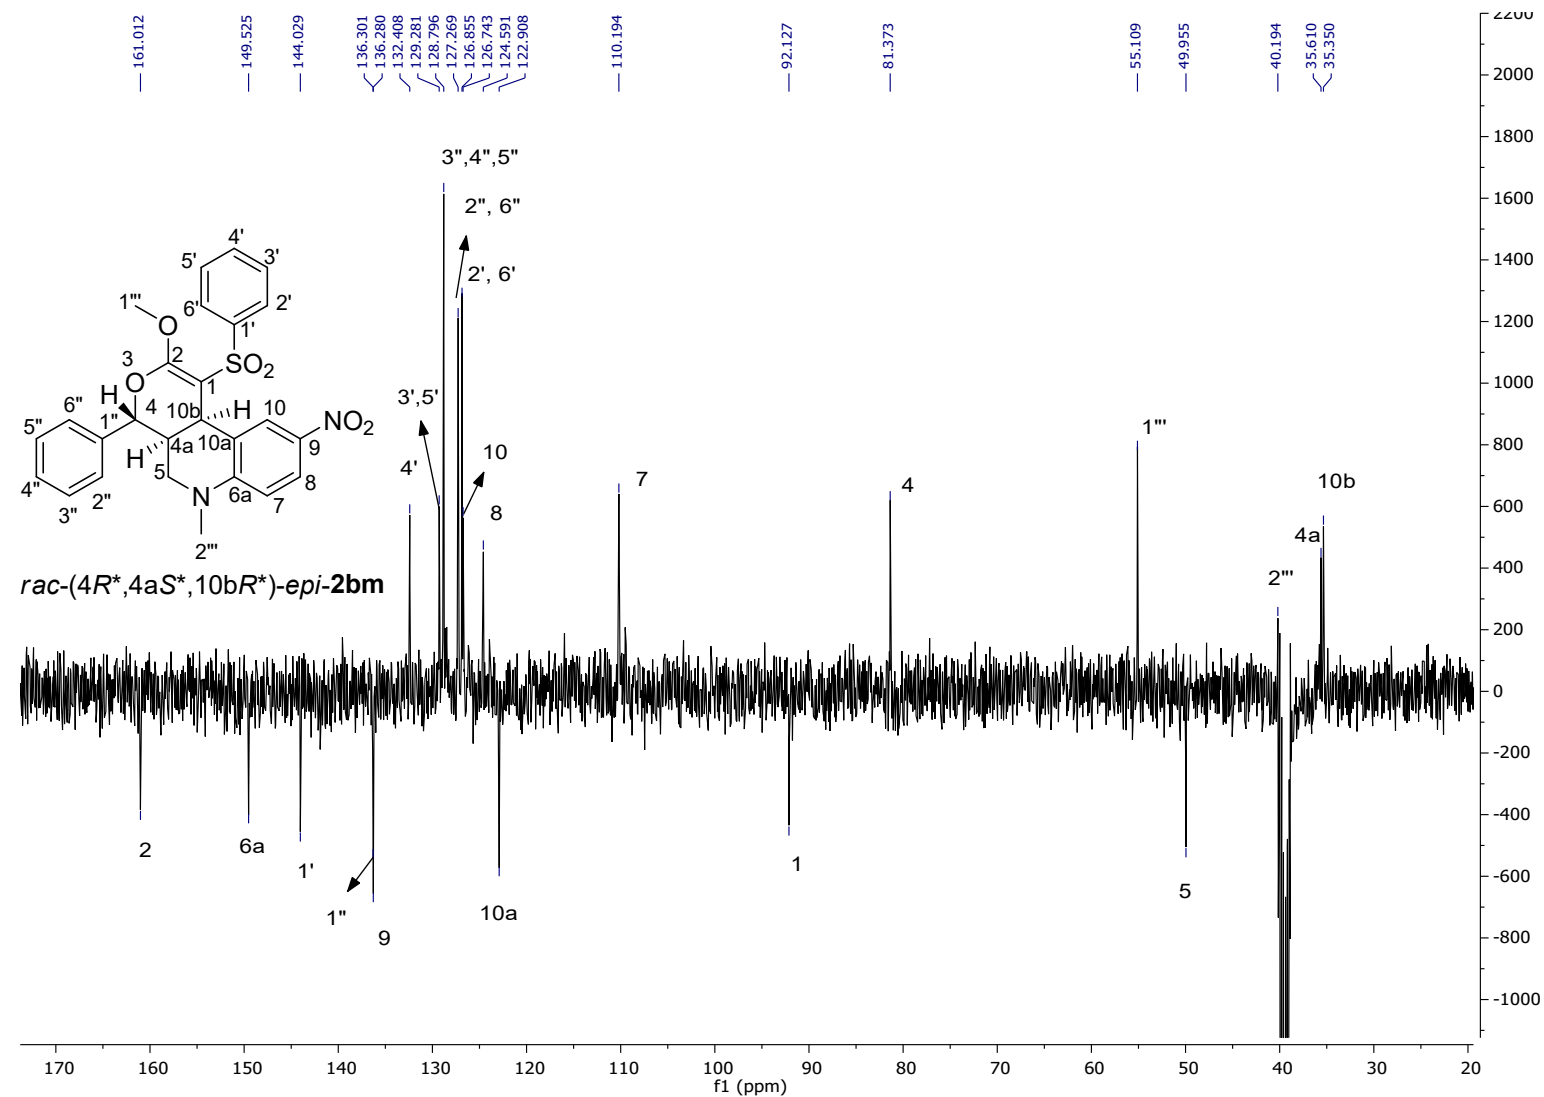

Figure S60. <sup>13</sup>C-NMR spectrum of *rac*-(4*R*\*,4*aS*\*,10*bR*\*)-*epi*-**2bm** in DMSO-d<sub>6</sub> at 100 MHz.

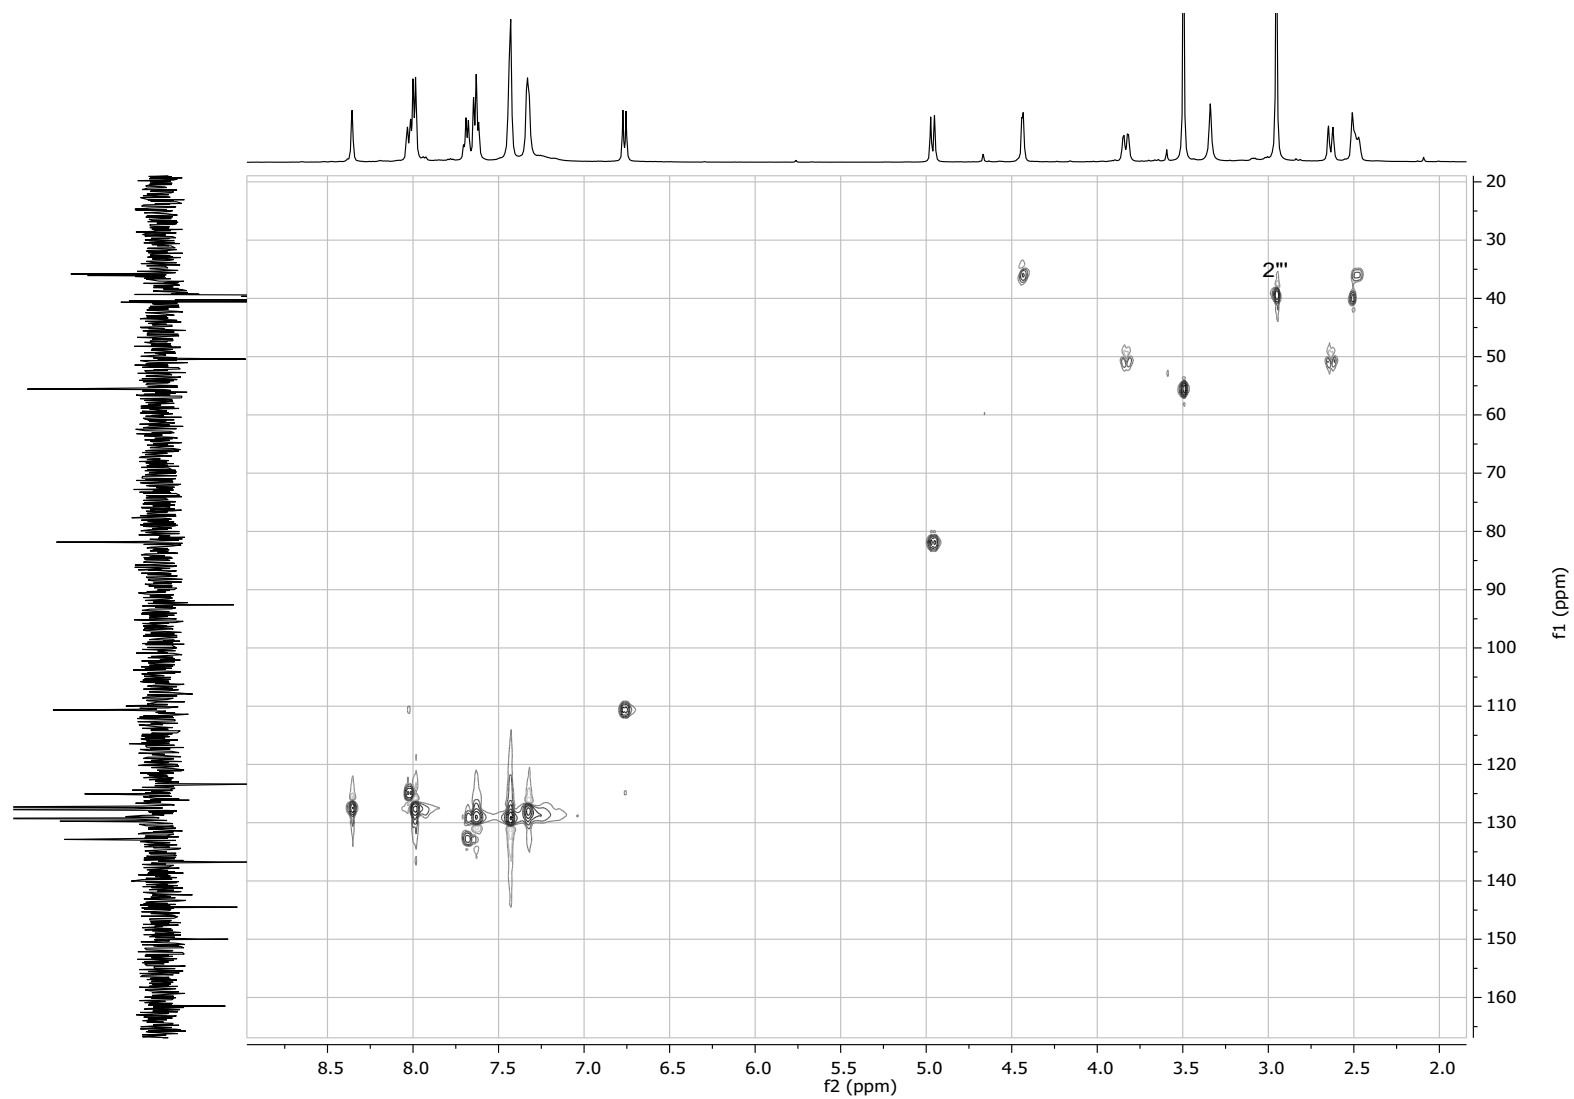

Figure S61. HSQC spectrum of *rac*-(4*R*\*,4*aS*\*,10*bR*\*)-*epi*-**2bm** in DMSO-*d*<sub>6</sub> at 500 MHz.

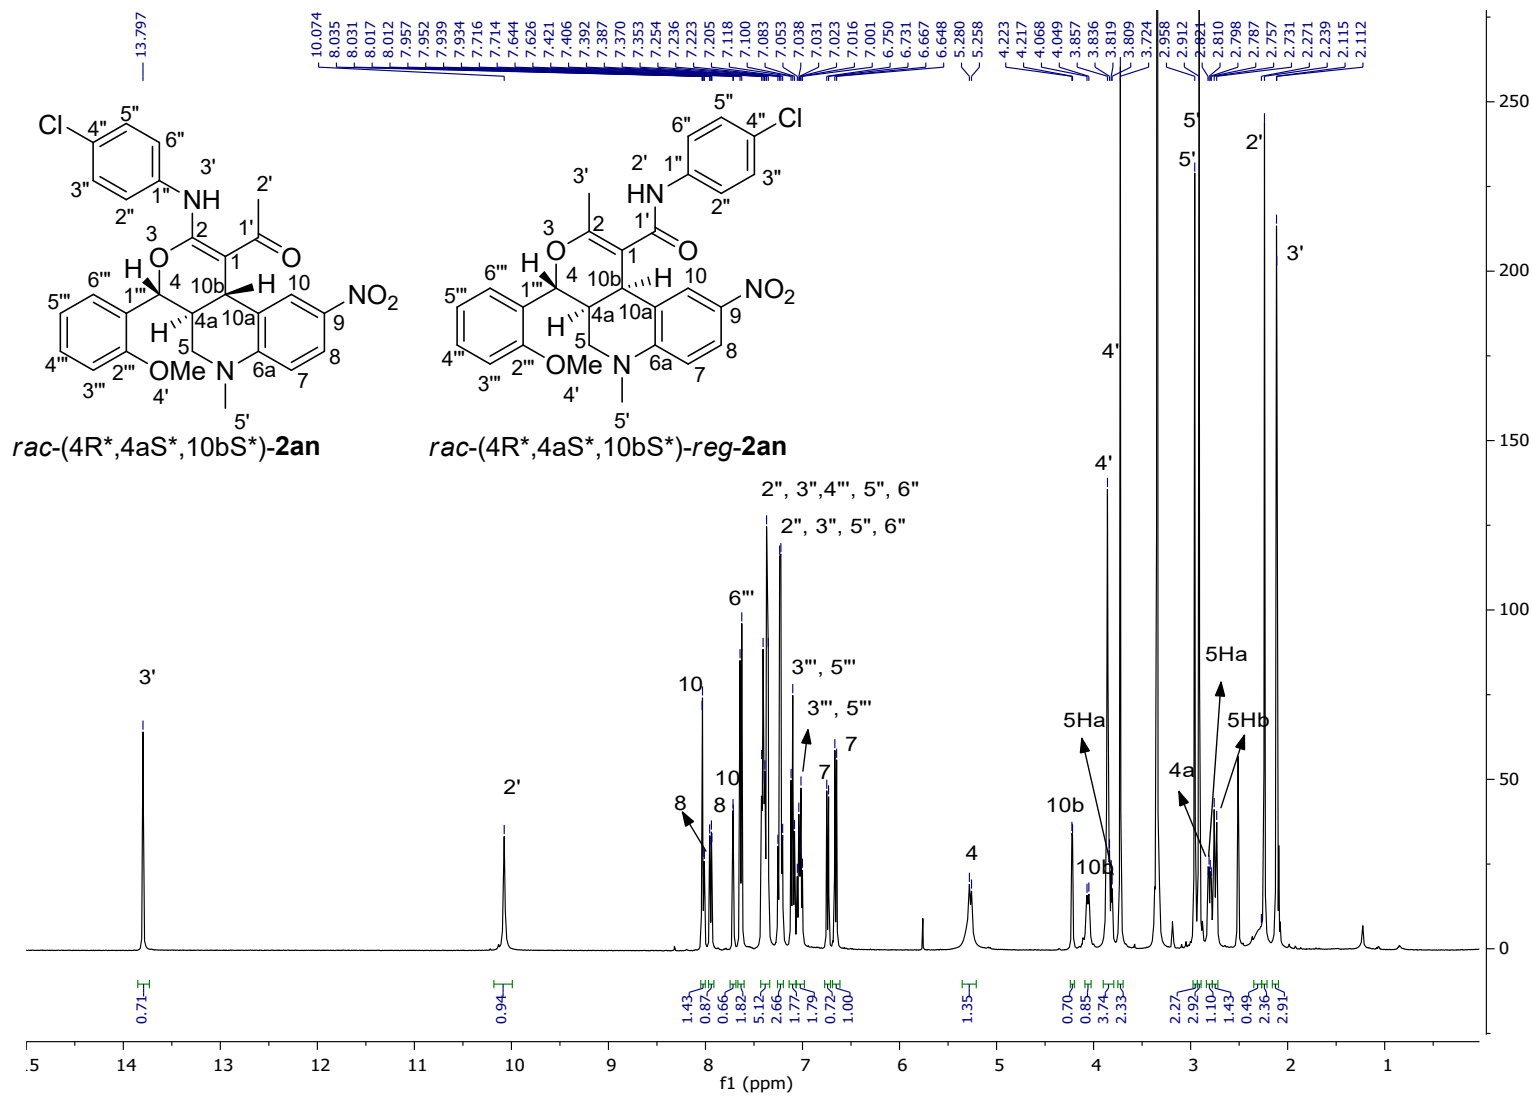

Figure S62. <sup>1</sup>H-NMR spectrum of *rac*-(4*R*<sup>\*</sup>,4*a**S*<sup>\*</sup>,10*b**S*<sup>\*</sup>)-**2an** and *rac*-(4*R*<sup>\*</sup>,4*a**S*<sup>\*</sup>,10*b**R*<sup>\*</sup>)-*reg*-**2an** in DMSO-d<sub>6</sub> at 500 MHz.



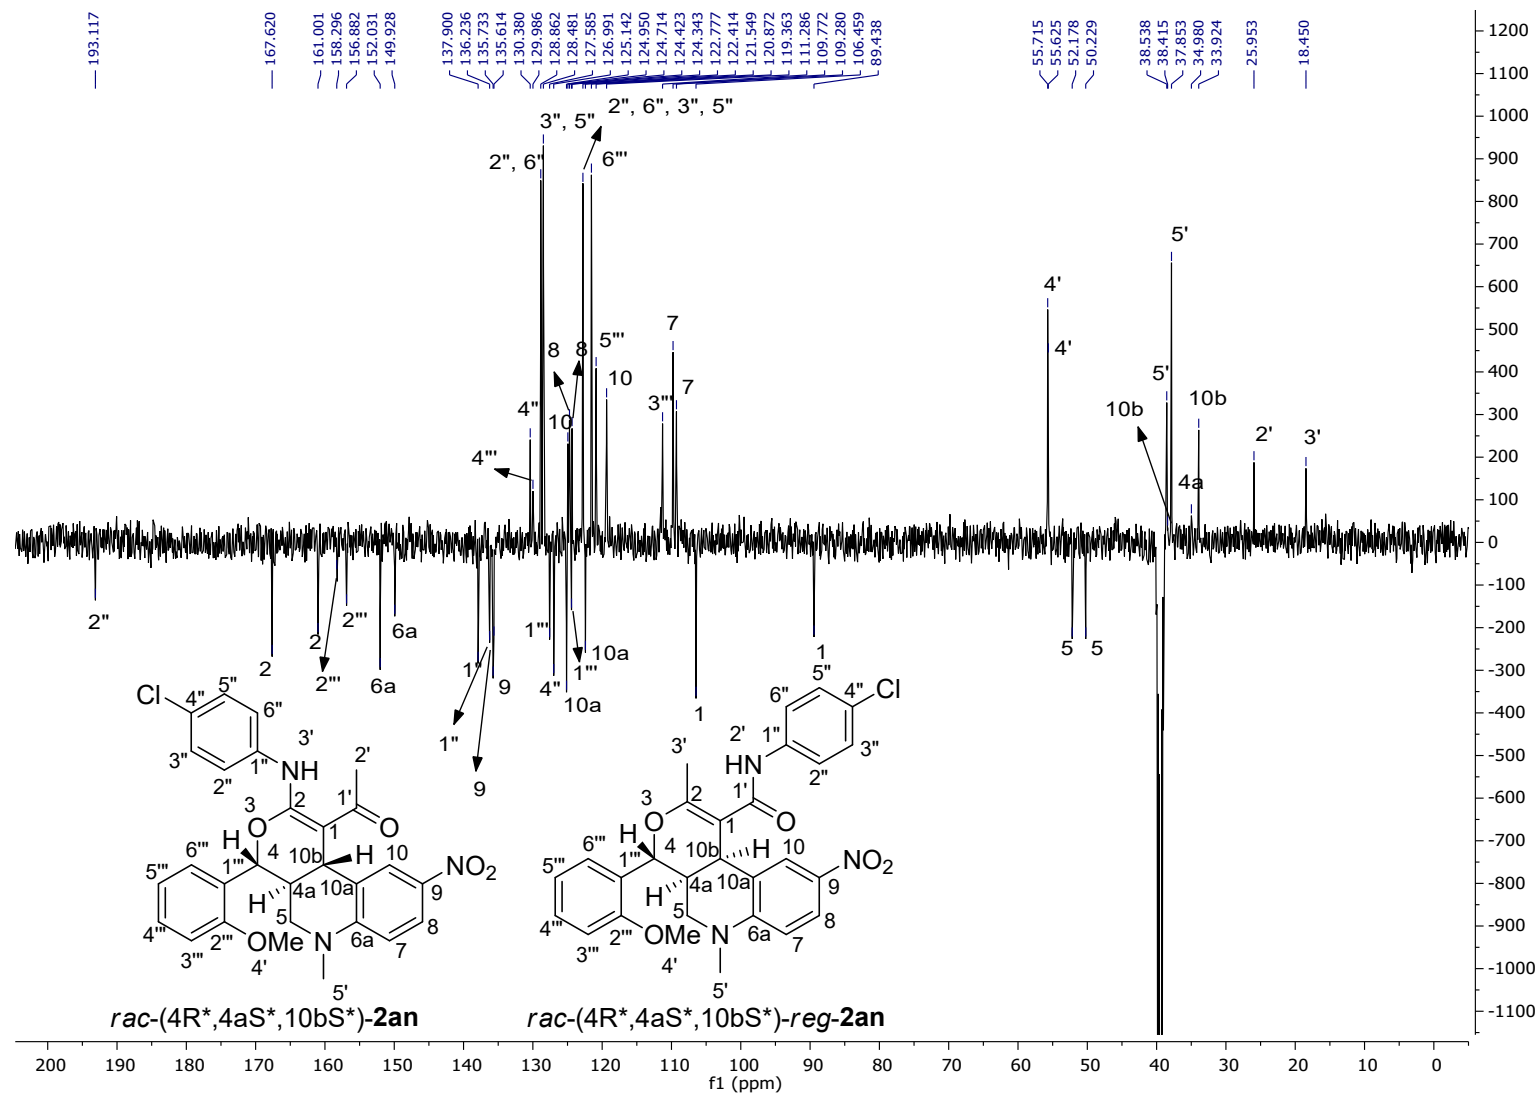

Figure S63.  $^{13}\text{C}$ -NMR spectrum of *rac*-(4R\*,4aS\*,10bS\*)-2an and *rac*-(4R\*,4aS\*,10bR\*)-reg-2an in DMSO- $d_6$  at 125 MHz.

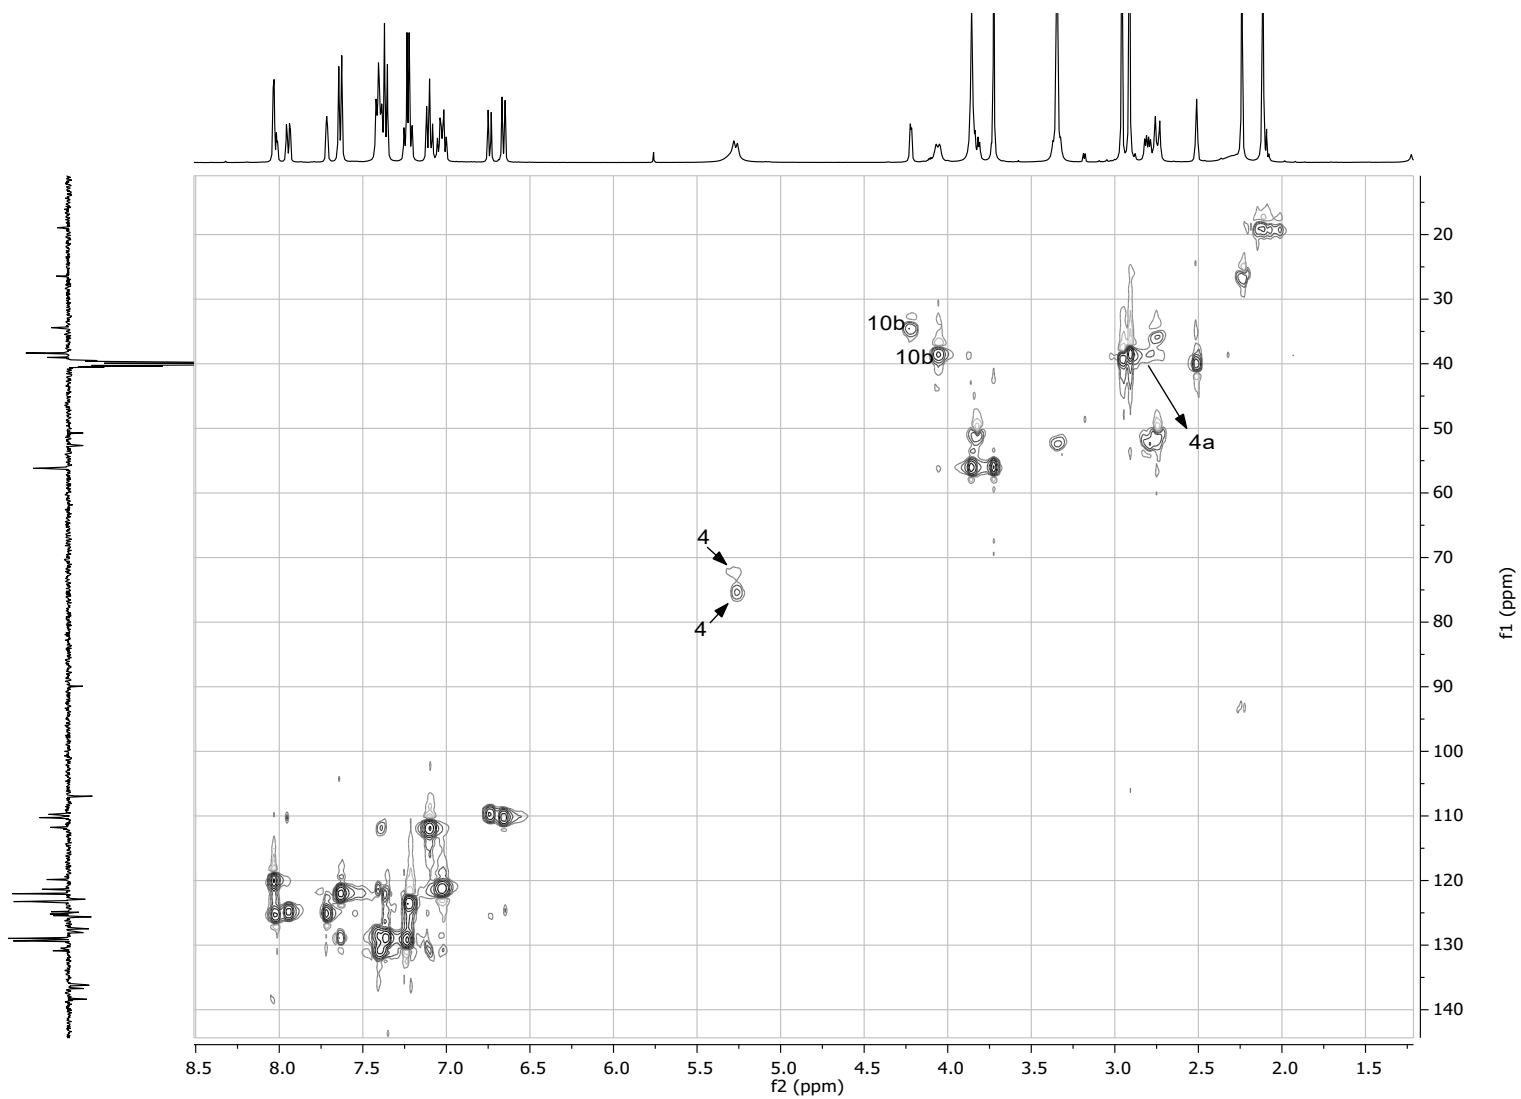

Figure S64. HSQC spectrum of *rac*-(4*R*<sup>\*</sup>,4*aS*<sup>\*</sup>,10*bS*<sup>\*</sup>)-**2an** and *rac*-(4*R*<sup>\*</sup>,4*aS*<sup>\*</sup>,10*bR*<sup>\*</sup>)-*reg*-**2an** in DMSO-*d*<sub>6</sub> at 500 MHz

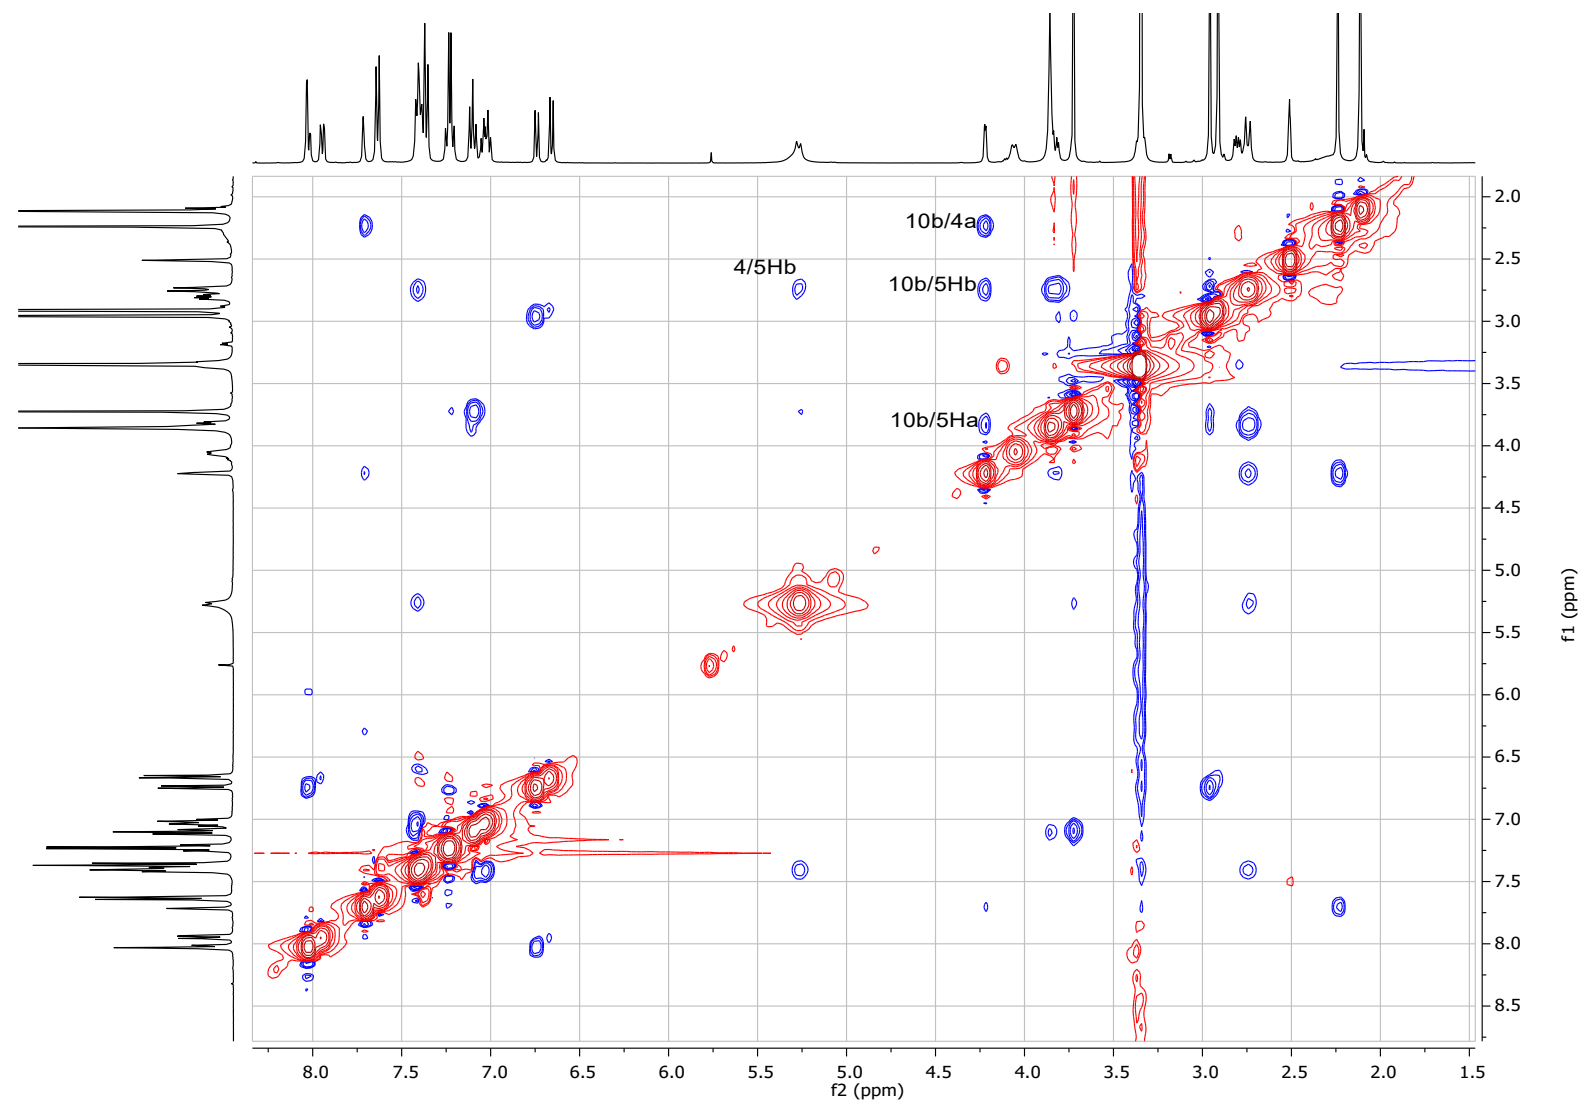

Figure S65. ROESY spectrum of *rac*-(4*R*<sup>\*</sup>,4*aS*<sup>\*</sup>,10*bS*<sup>\*</sup>)-**2an** and *rac*-(4*R*<sup>\*</sup>,4*aS*<sup>\*</sup>,10*bR*<sup>\*</sup>)-*reg*-**2an** in DMSO-*d*<sub>6</sub> at 500 MHz

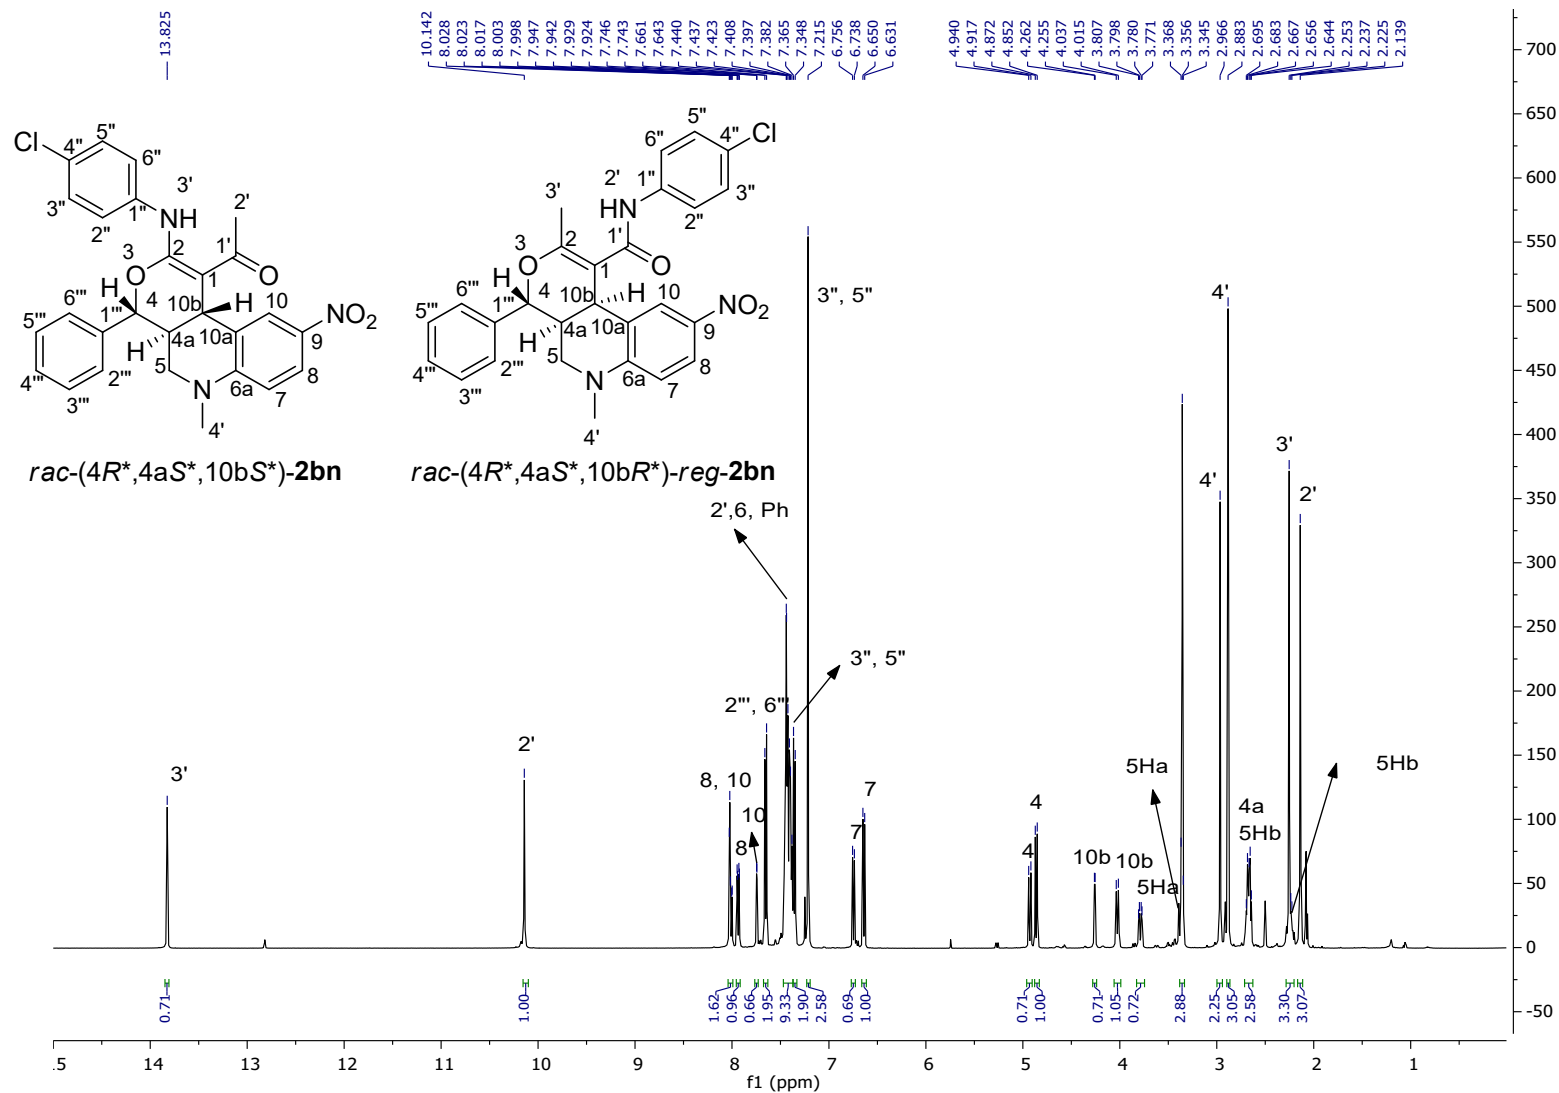

Figure S66. <sup>1</sup>H-NMR spectrum of *rac*-(4R\*,4aS\*,10bS\*)-2bn and *rac*-(4R\*,4aS\*,10bR\*)-reg-2bn in DMSO-d<sub>6</sub> at 500 MHz.

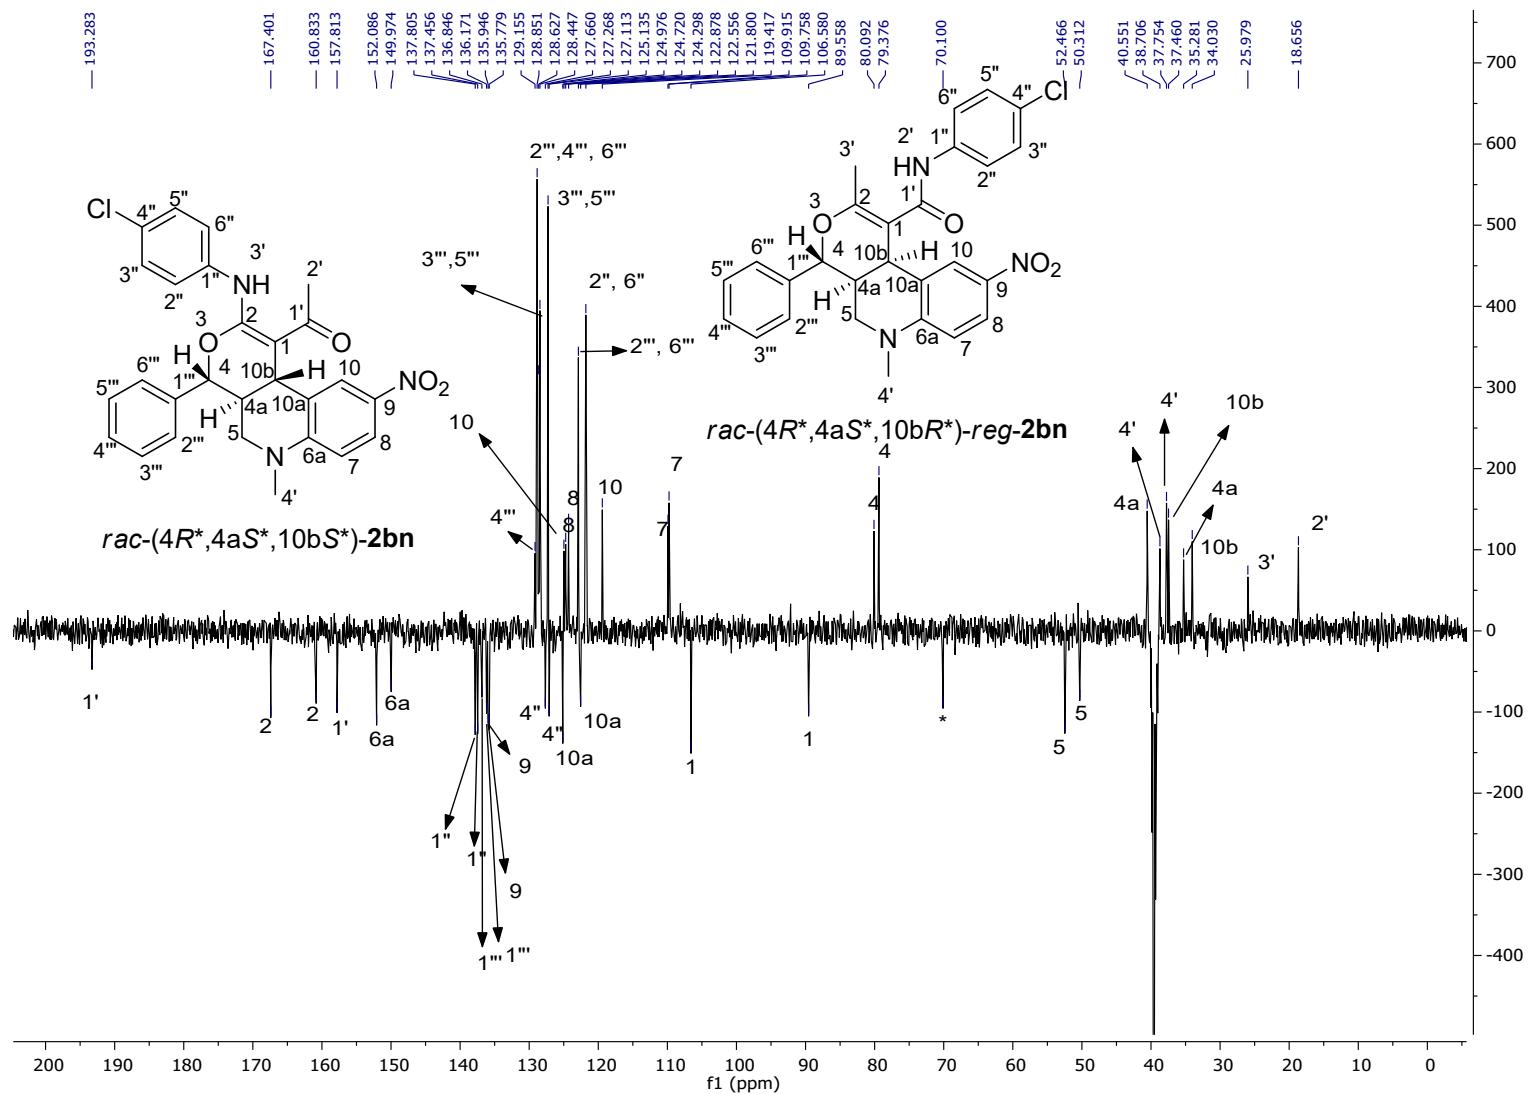

Figure S67.  $^{13}\text{C}$ -NMR spectrum of *rac*-(4*R*<sup>\*</sup>,4*aS*<sup>\*</sup>,10*bS*<sup>\*</sup>)-**2bn** and *rac*-(4*R*<sup>\*</sup>,4*aS*<sup>\*</sup>,10*bR*<sup>\*</sup>)-*reg*-**2bn** in DMSO-*d*<sub>6</sub> at 125 MHz.

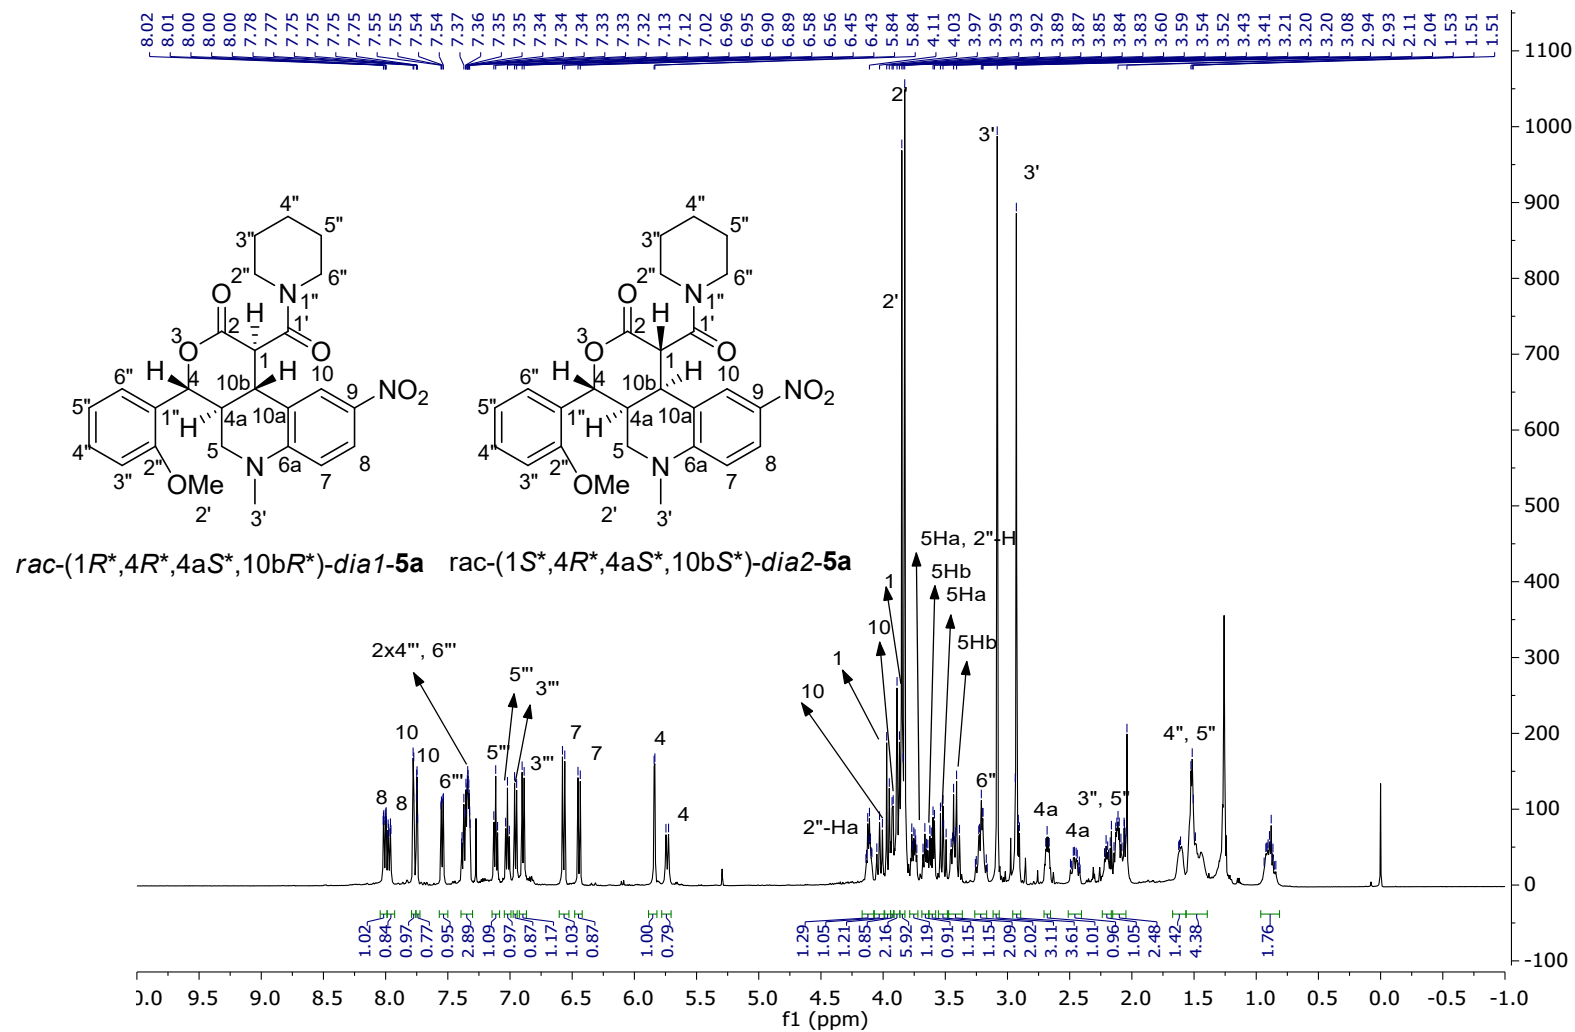

Figure S68.  $^1H$ -NMR spectrum of the ~5:4 mixture of  $rac-(1R^*,4R^*,4aS^*,10bR^*)-dia1-5a$  and  $rac-(1S^*,4R^*,4aS^*,10bS^*)-dia2-5a$  in  $CDCl_3$  at 500 MHz.

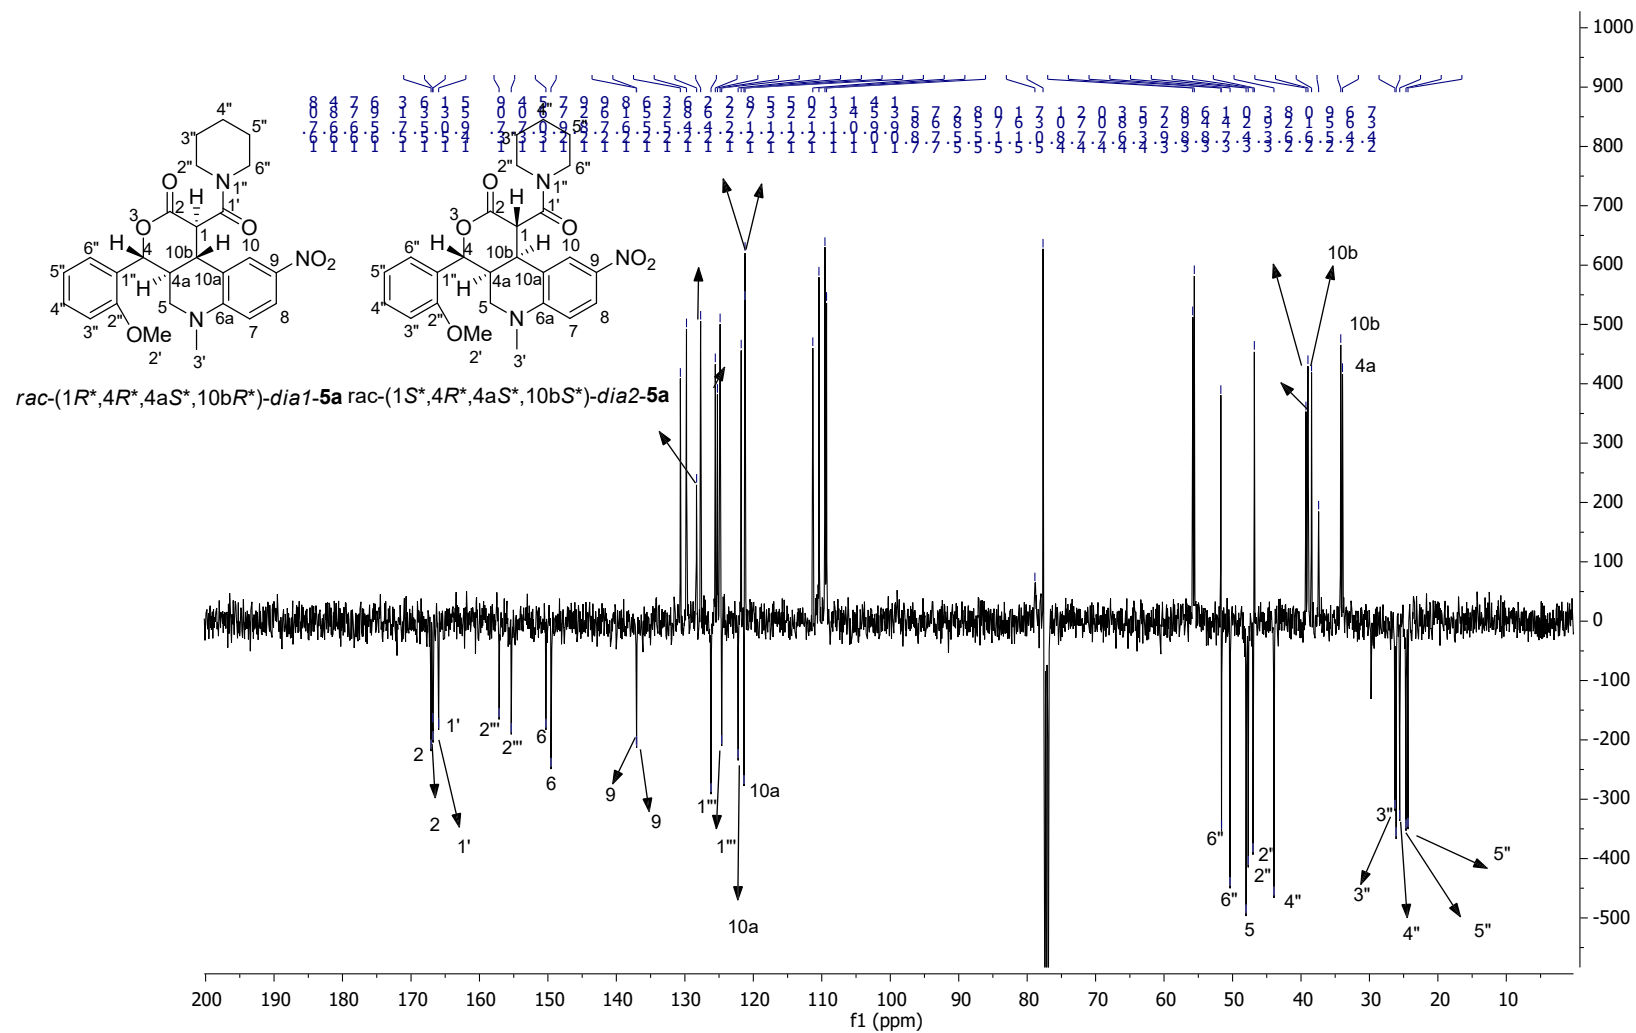

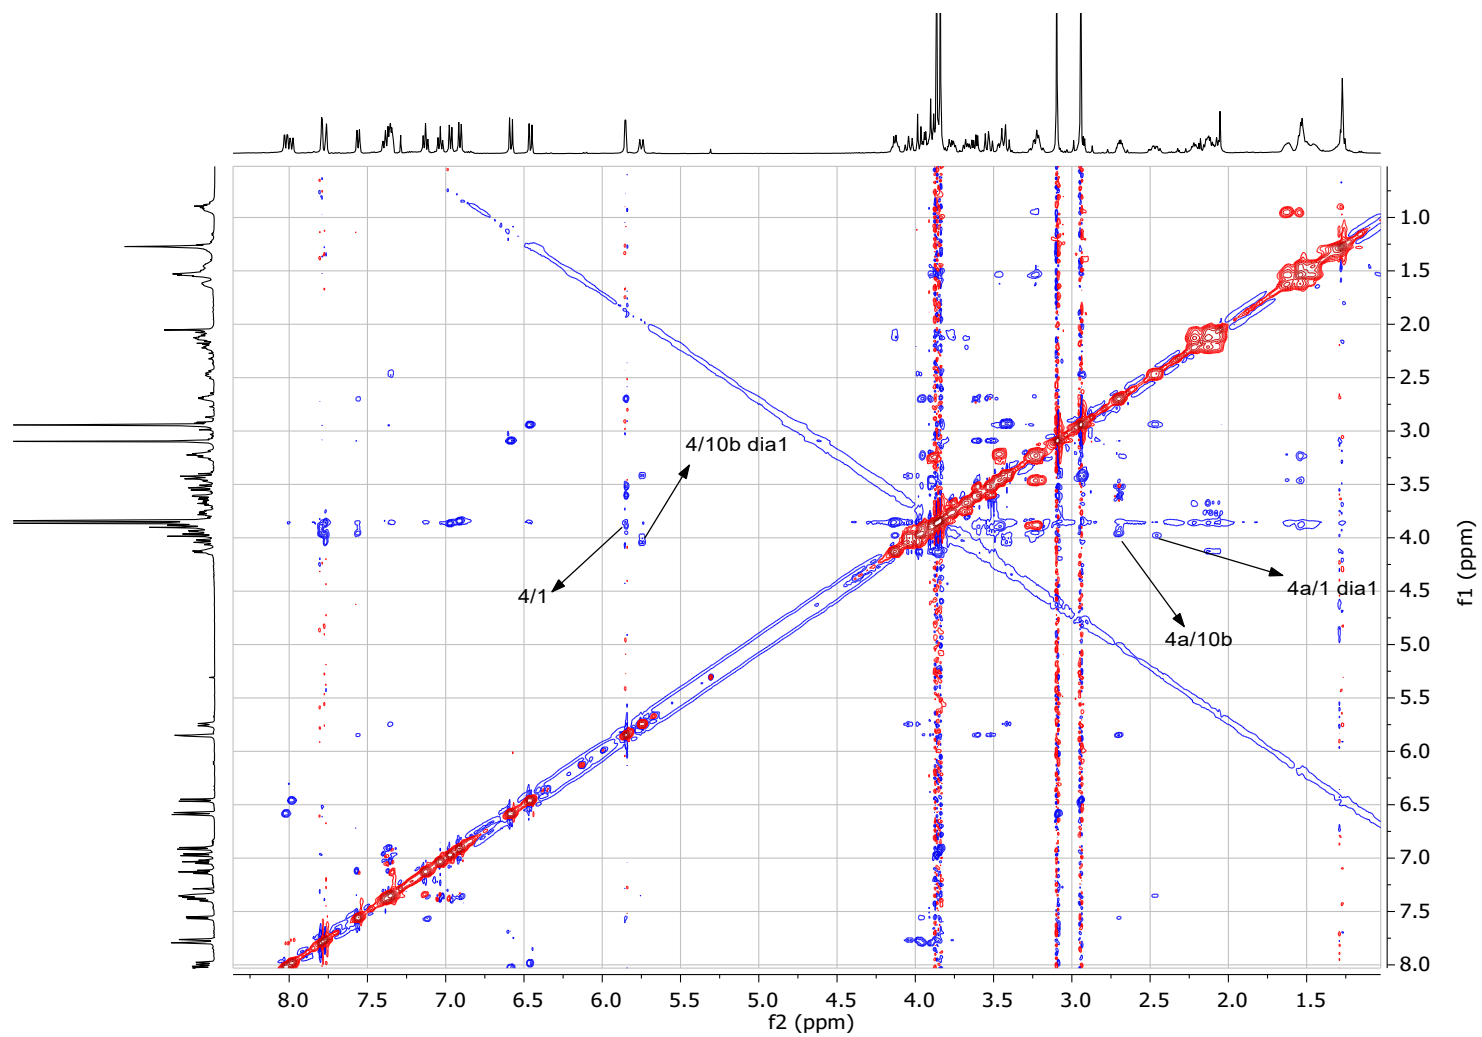

Figure S70. ROESY spectrum of the ~5:4 mixture of *rac*-(1*R*\*,4*R*\*,4*aS*\*,10*bR*\*)-*dia1*-**5a** and *rac*-(1*S*\*,4*R*\*,4*aS*\*,10*bS*\*)-*dia2*-**5a** in CDCl<sub>3</sub> at 500 MHz.



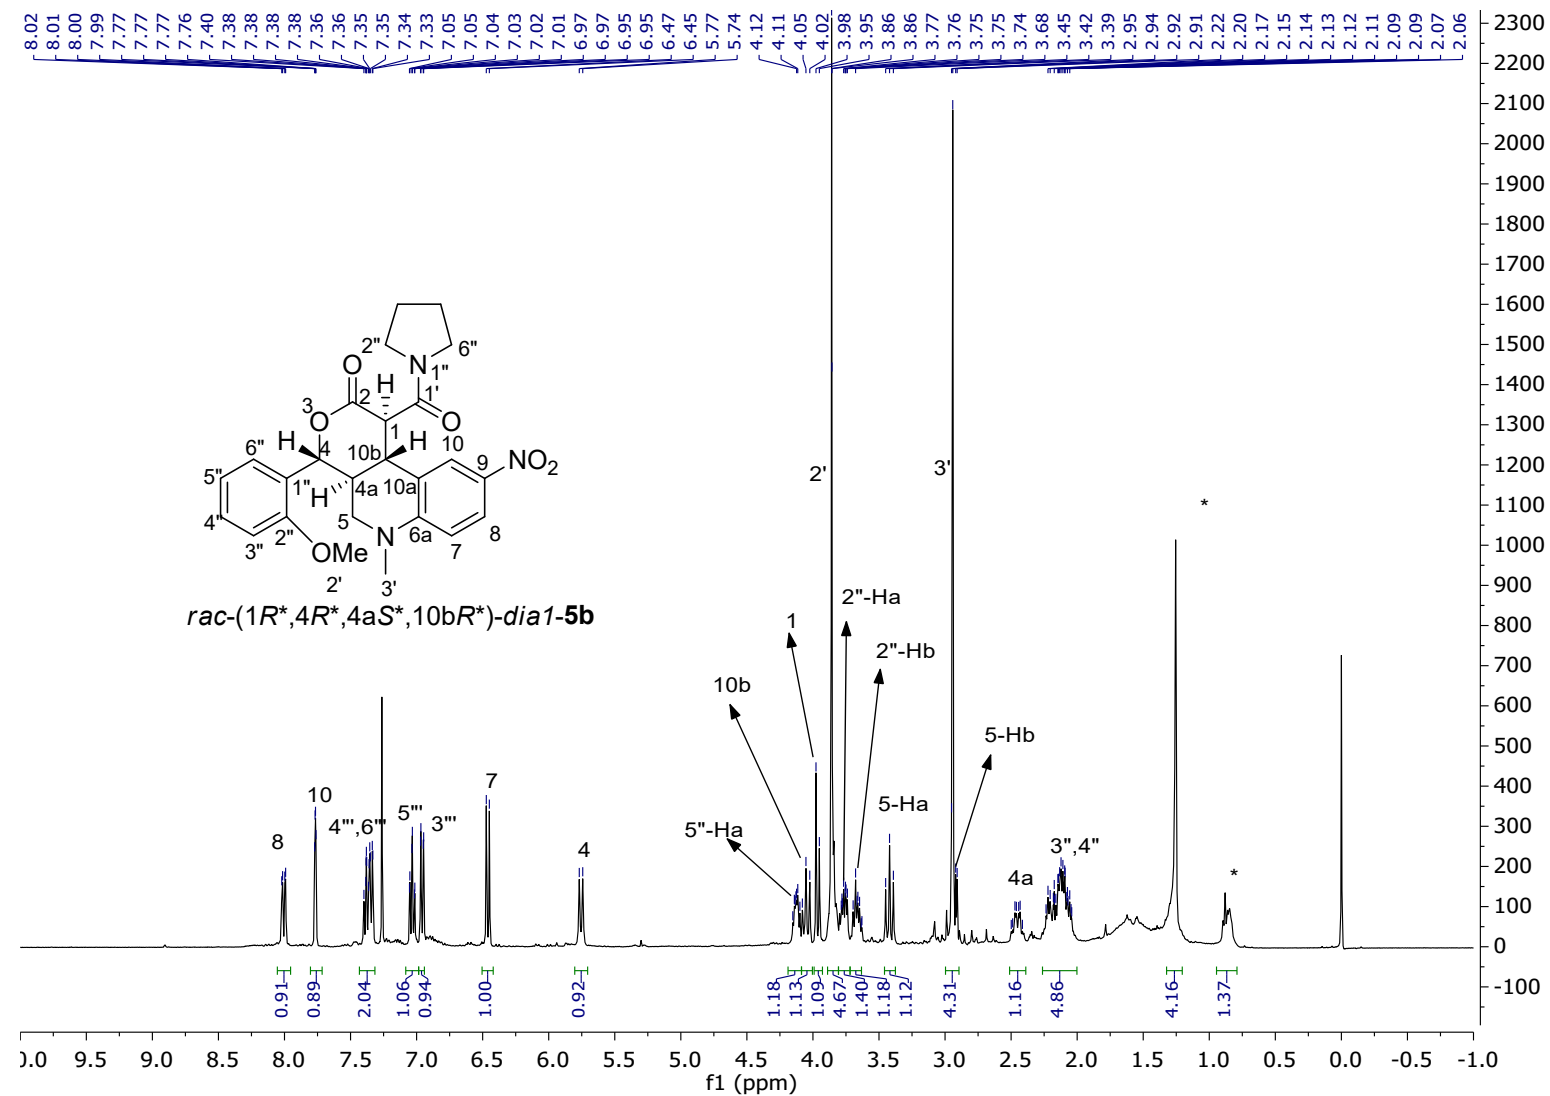

Figure S71. <sup>1</sup>H-NMR spectrum of the *rac*-(1*R*<sup>\*</sup>,4*R*<sup>\*</sup>,4*aS*<sup>\*</sup>,10*bR*<sup>\*</sup>)-*dial*-**5b** in CDCl<sub>3</sub> at 400 MHz.

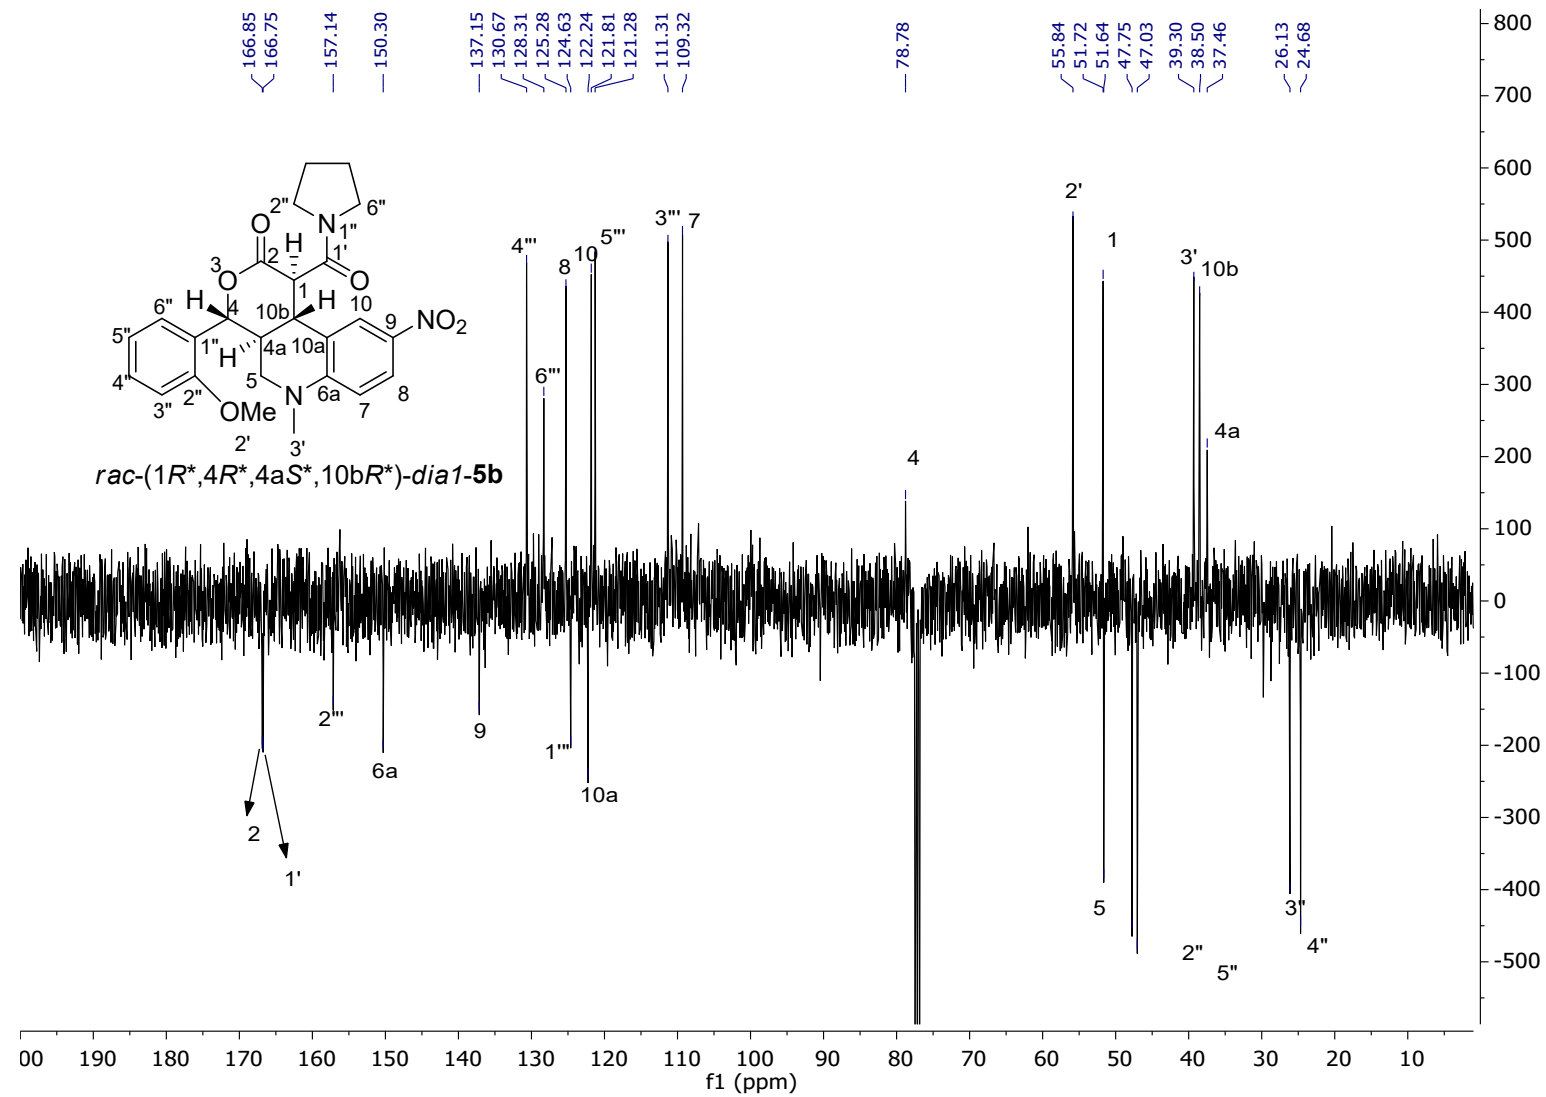

Figure S72. <sup>13</sup>C-NMR spectrum of the *rac*-(1*R*\*,4*R*\*,4*aS*\*,10*bR*\*)-*dial*-**5b** in CDCl<sub>3</sub> at 100 MHz.

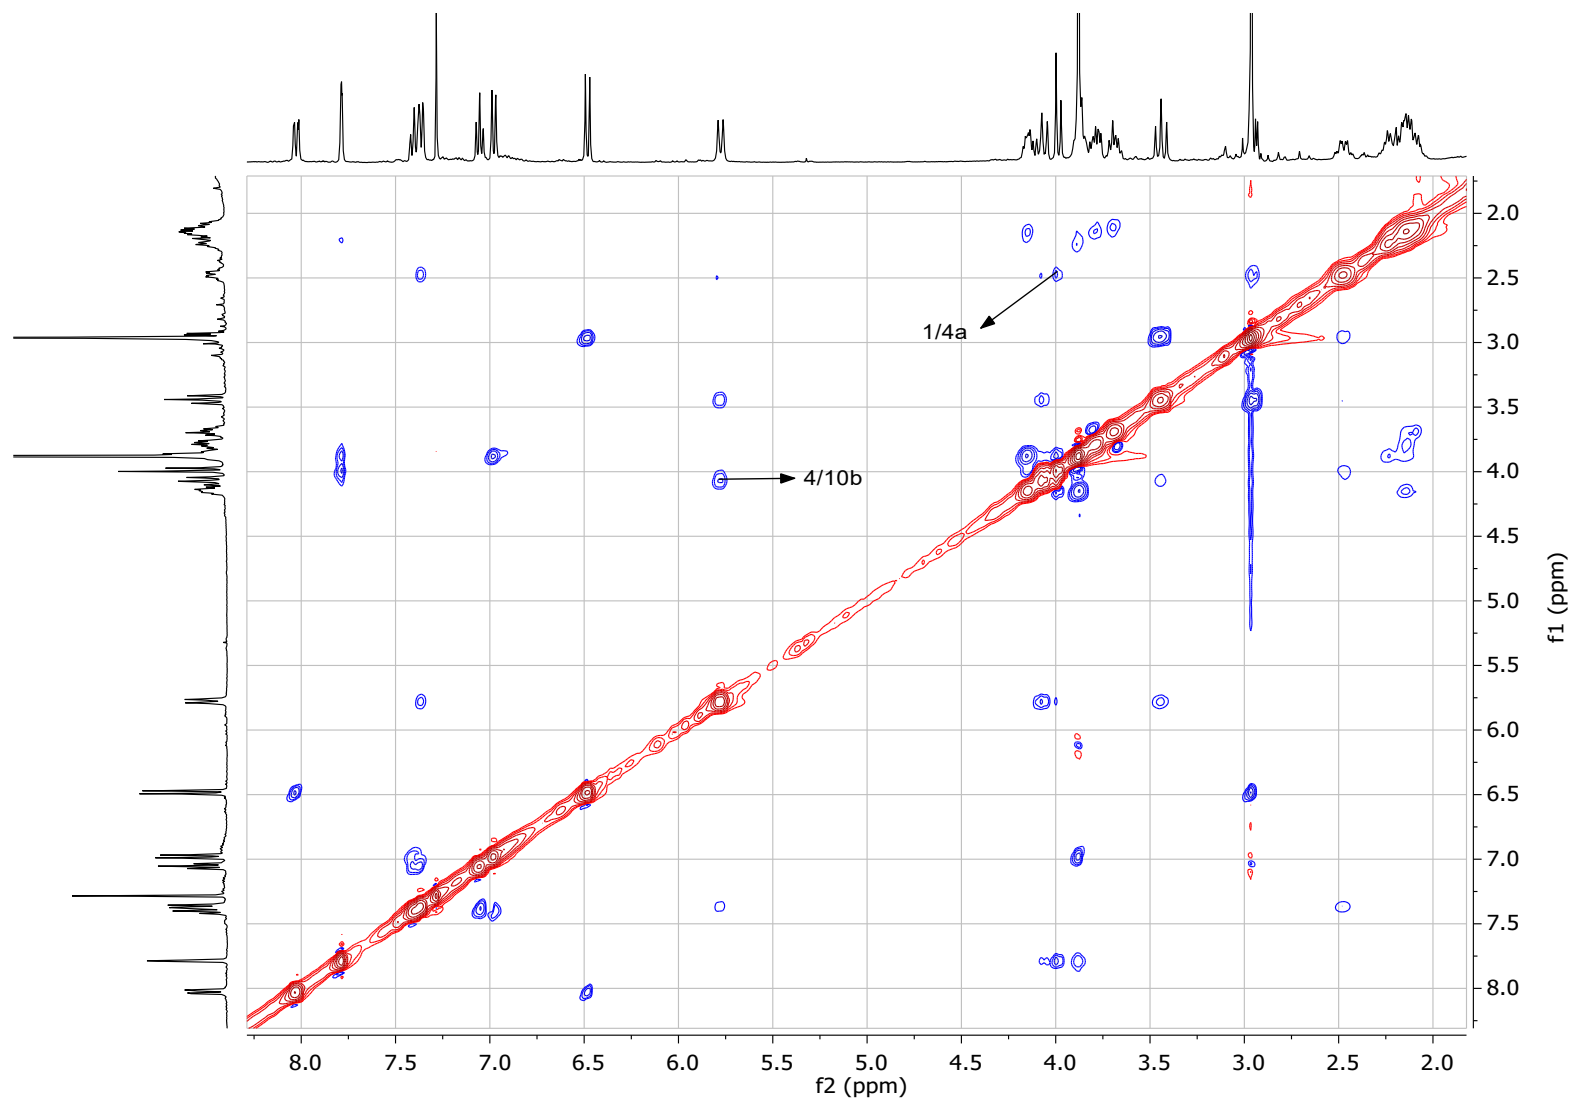

Figure S73. NOESY spectrum of the *rac*-(1*R*<sup>\*</sup>,4*R*<sup>\*</sup>,4*aS*<sup>\*</sup>,10*bR*<sup>\*</sup>)-*dia1-5b* in CDCl<sub>3</sub> at 400 MHz.

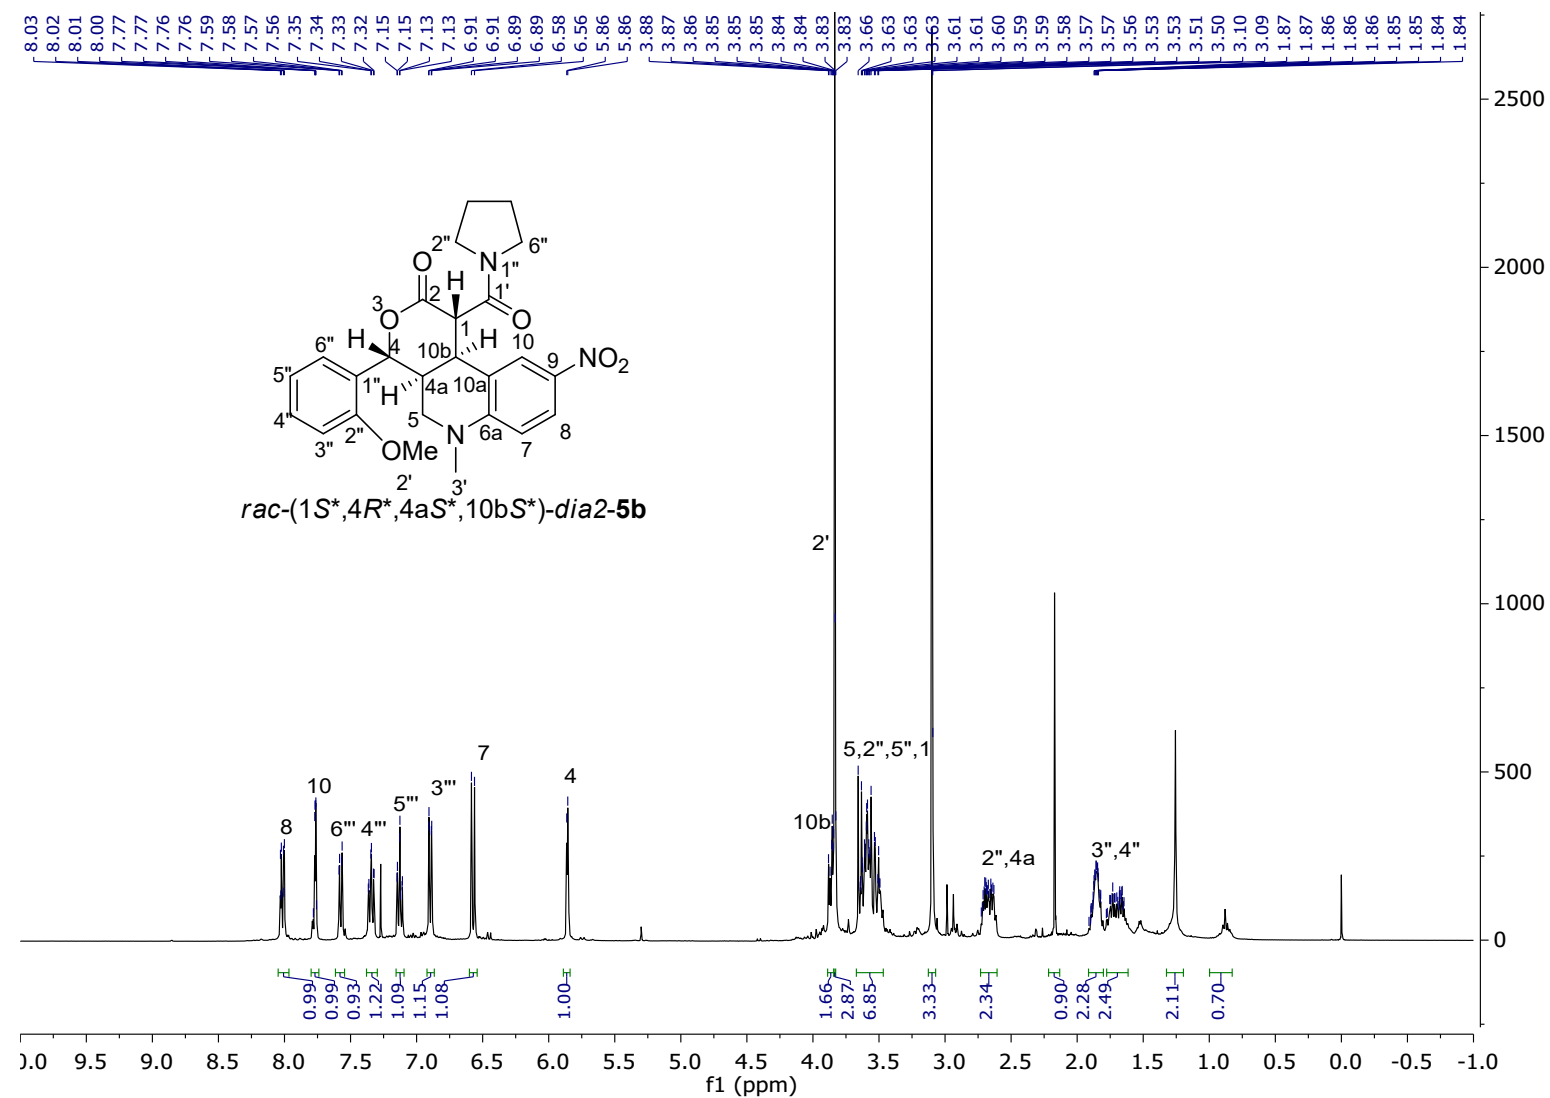

Figure S74. <sup>1</sup>H-NMR spectrum of the *rac*-(1*S*\*,4*R*\*,4*aS*\*,10*bS*\*)-**dia2-5b** in CDCl<sub>3</sub> at 400 MHz.



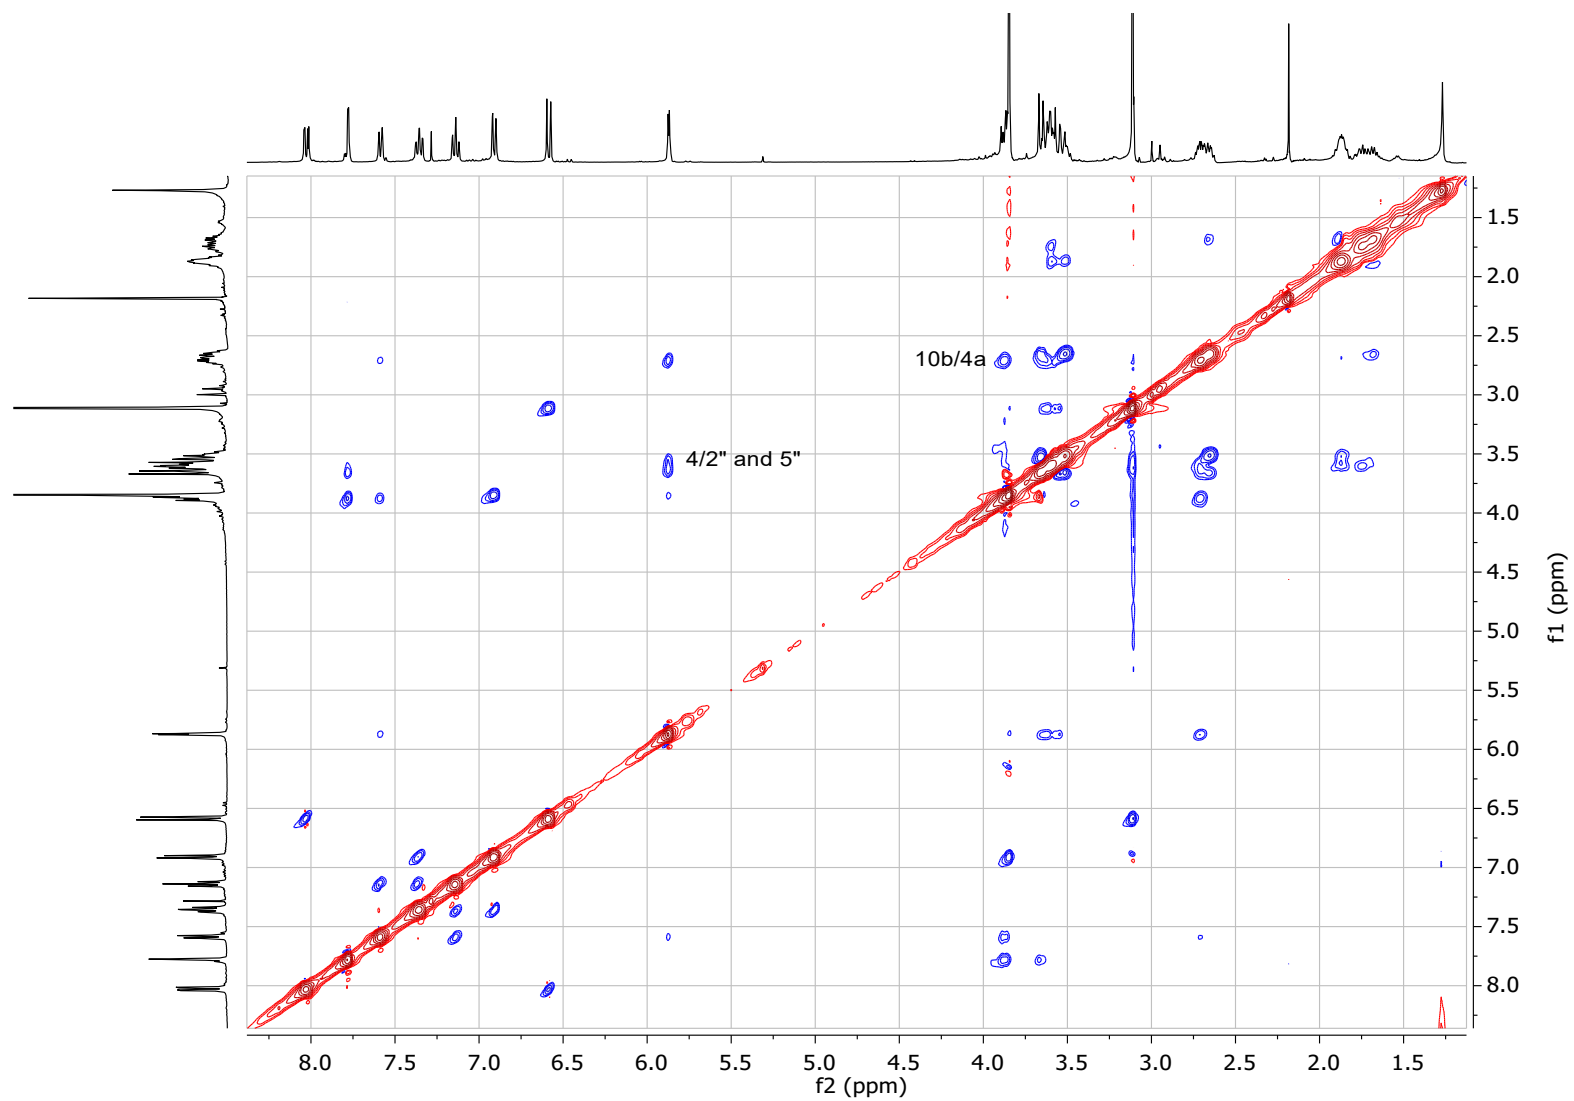

Figure S76. NOESY spectrum of the *rac*-(1*S*\*,4*R*\*,4*aS*\*,10*bS*\*)-*dia*2-**5b** in CDCl<sub>3</sub> at 400 MHz.

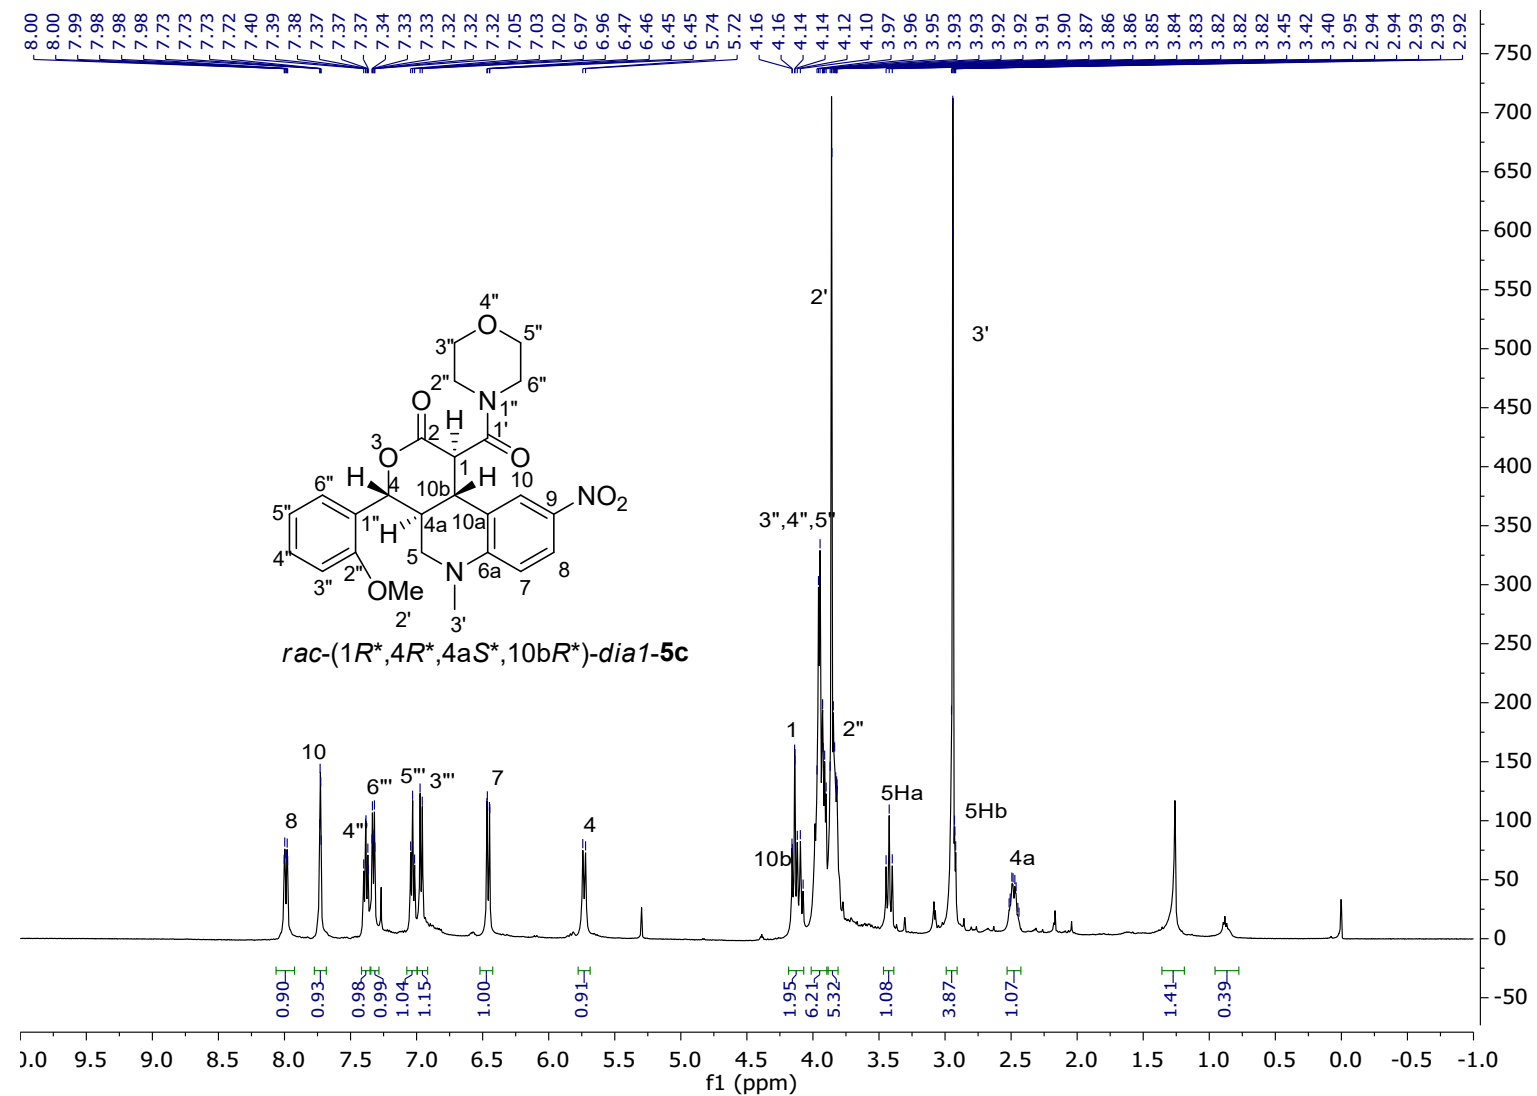

Figure S77. <sup>1</sup>H-NMR spectrum of the *rac*-(1*R*\*,4*R*\*,4*aS*\*,10*bR*\*)-*dia1-5c* in CDCl<sub>3</sub> at 500 MHz.

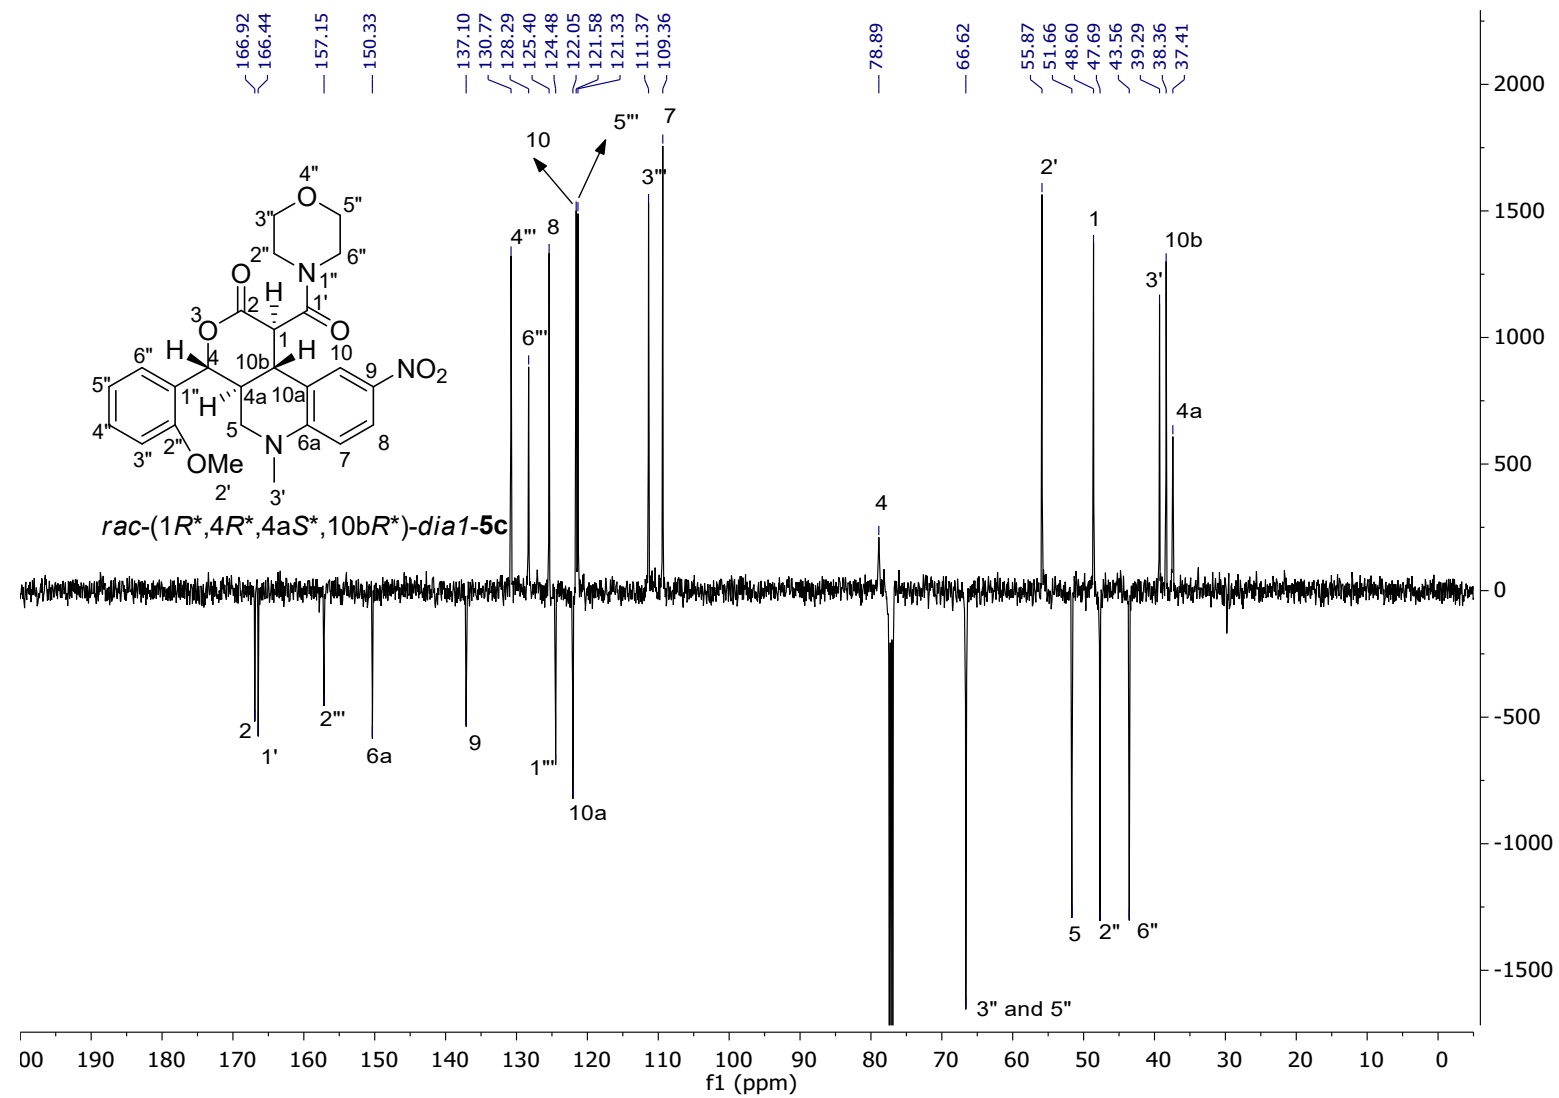

Figure S78. <sup>13</sup>C-NMR spectrum of the *rac*-(1*R*\*,4*R*\*,4*aS*\*,10*bR*\*)-**dial-5c** in CDCl<sub>3</sub> at 125 MHz.



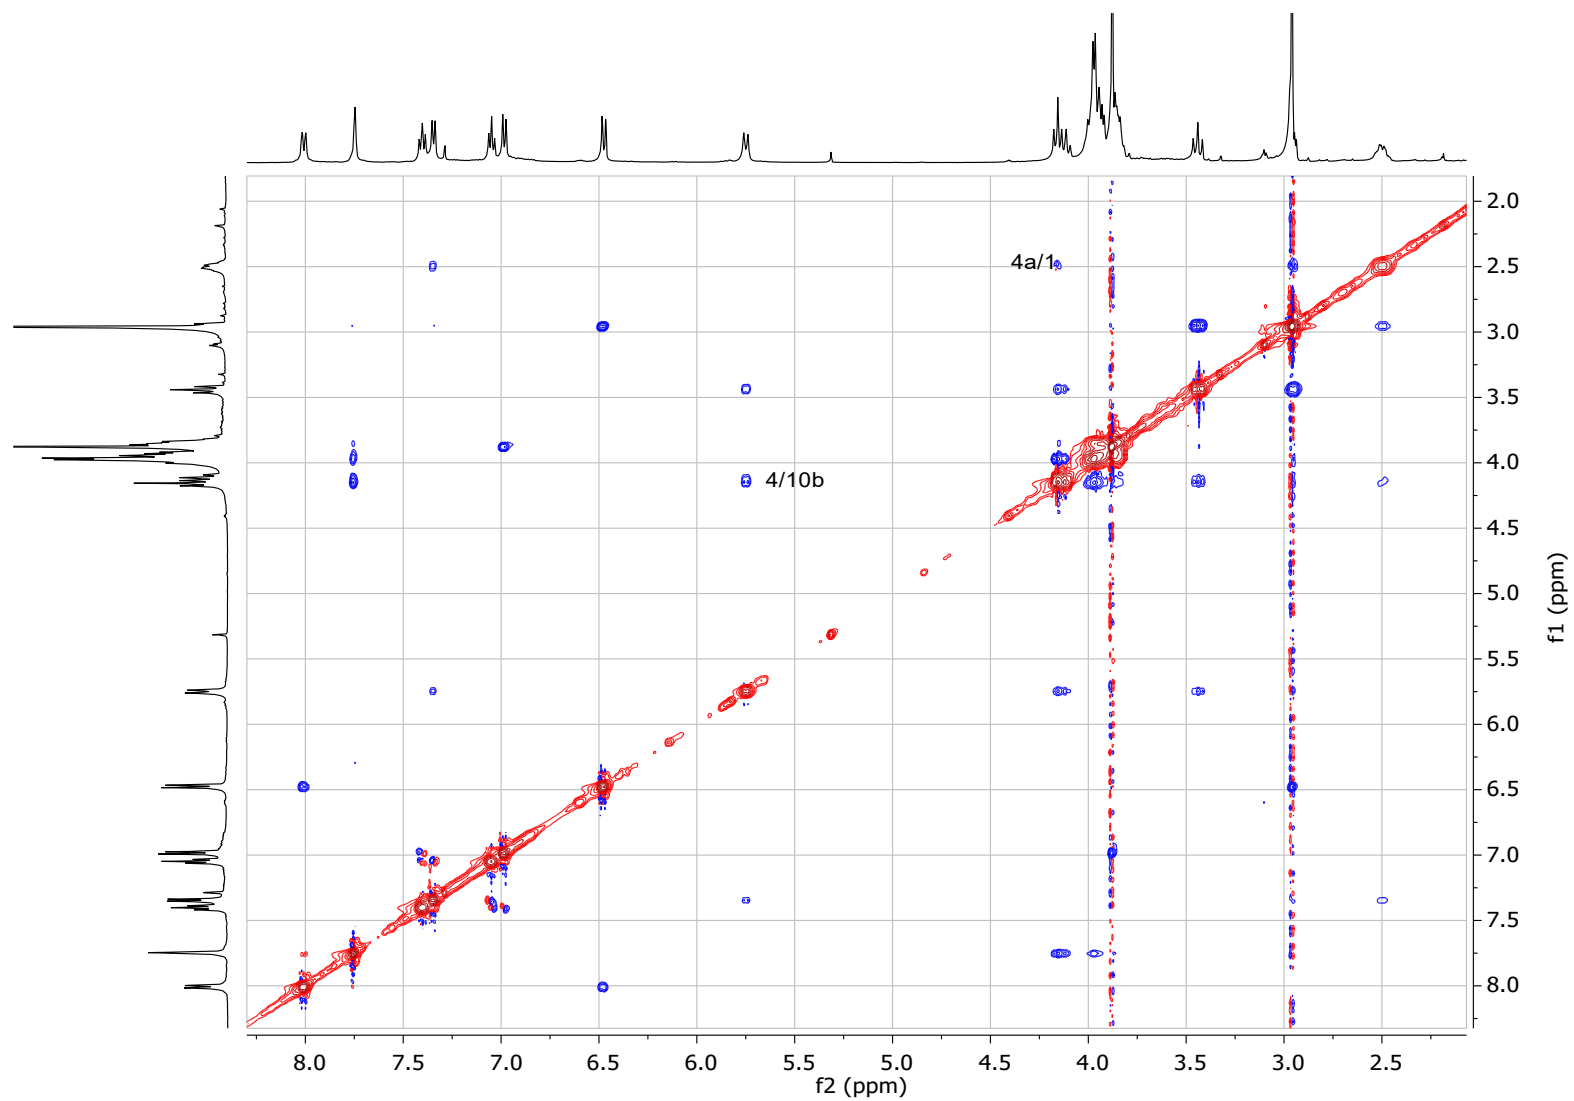

Figure S79. ROESY spectrum of the *rac*-(1*R*\*,4*R*\*,4*aS*\*,10*bR*\*)-*dial*-**5c** in CDCl<sub>3</sub> at 500 MHz.

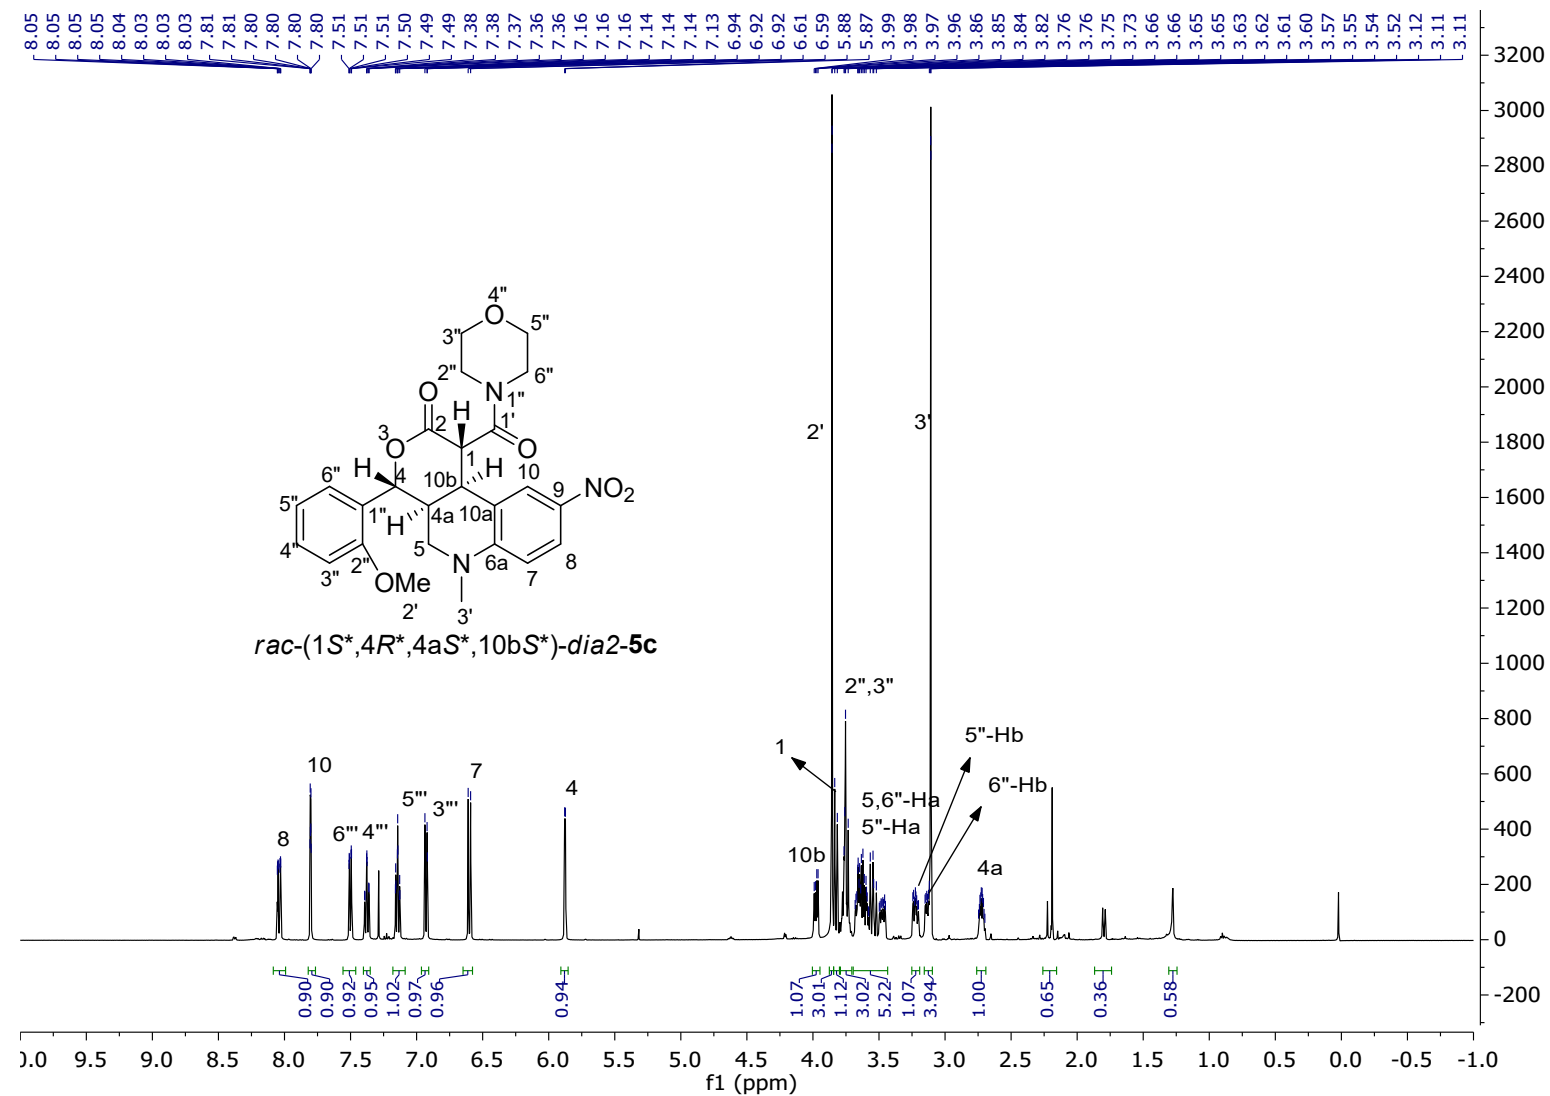

Figure S80. <sup>1</sup>H-NMR spectrum of the *rac*-(1*S*<sup>\*</sup>,4*R*<sup>\*</sup>,4*aS*<sup>\*</sup>,10*bS*<sup>\*</sup>)-*dia2-5c* in CDCl<sub>3</sub> at 500 MHz.

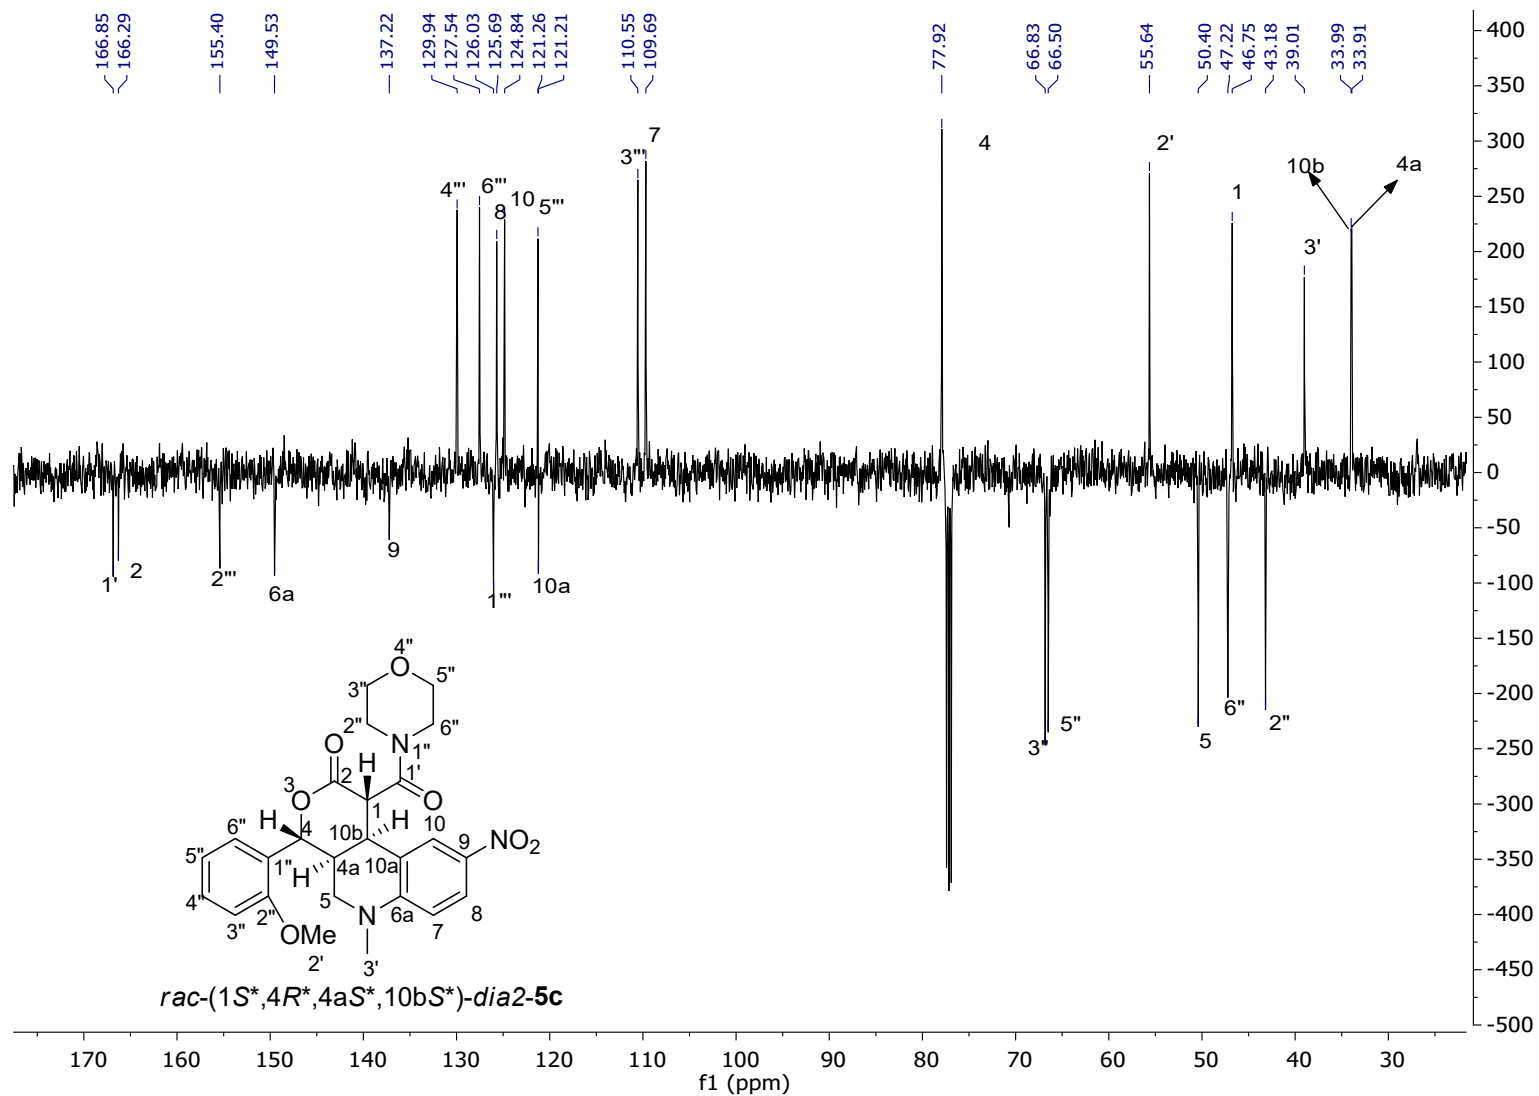

Figure S81. <sup>13</sup>C-NMR spectrum of the *rac*-(1*S*<sup>\*</sup>,4*R*<sup>\*</sup>,4*aS*<sup>\*</sup>,10*bS*<sup>\*</sup>)-*dia*2-**5c** in CDCl<sub>3</sub> at 125 MHz.

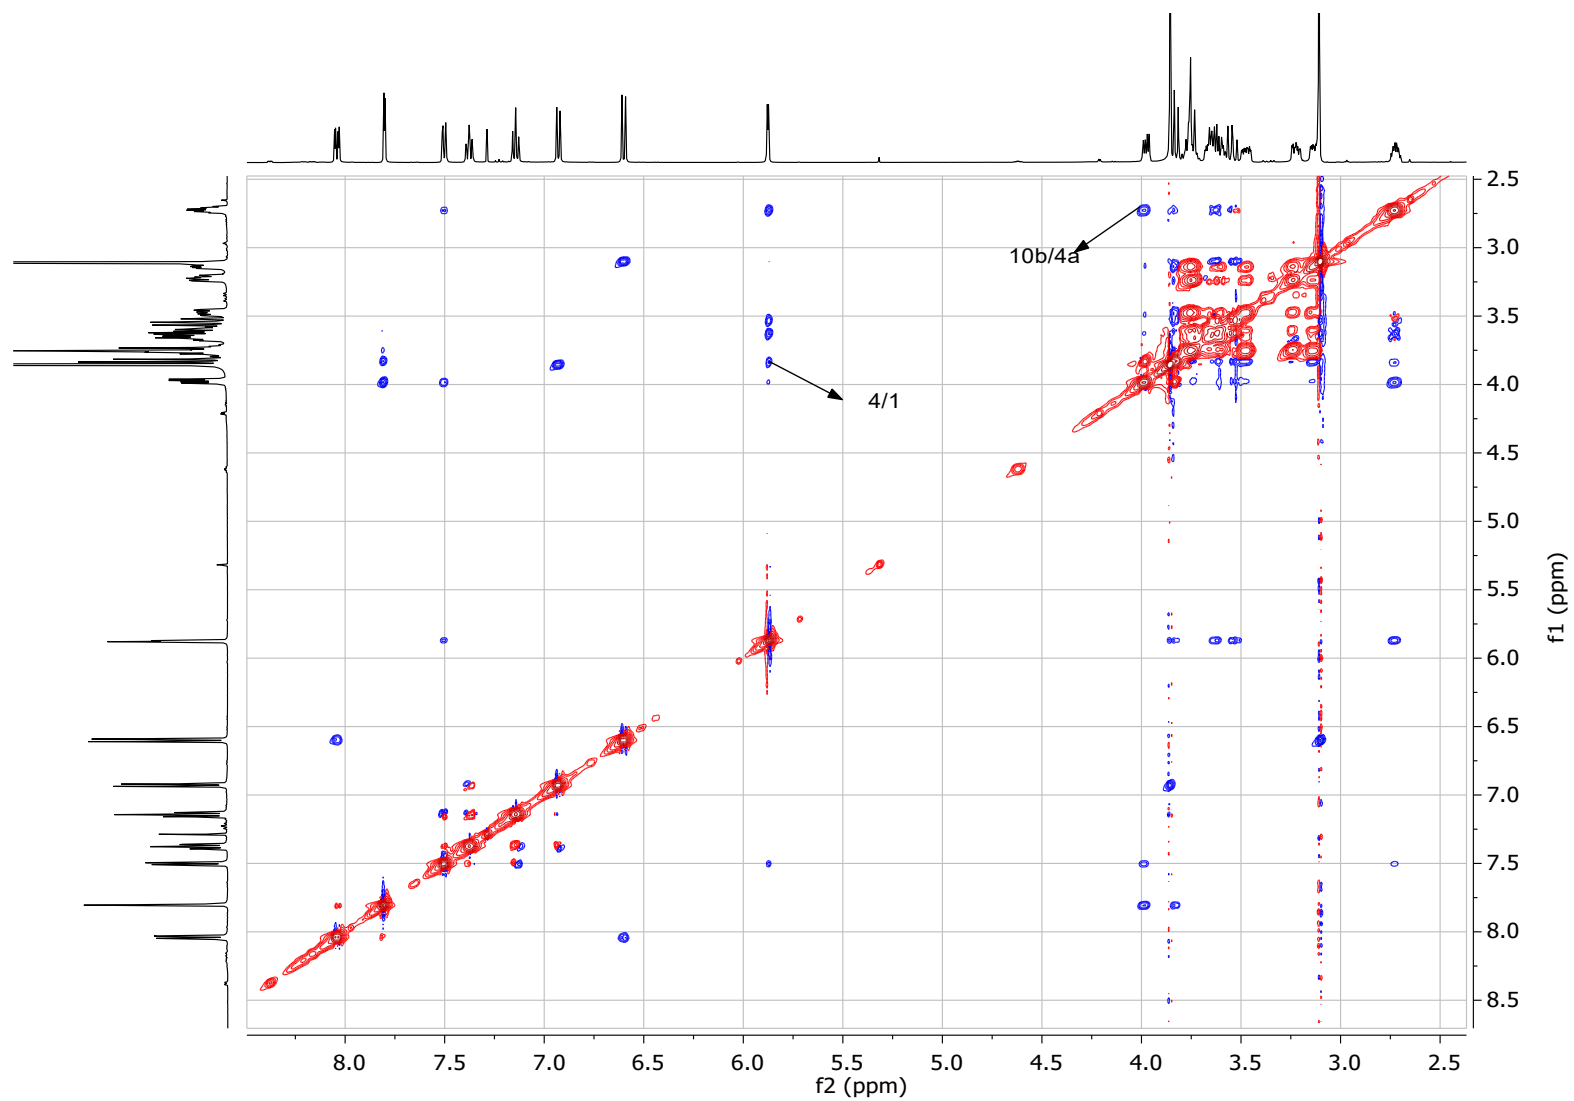

Figure S82. ROESY spectrum of the *rac*-(1*S*<sup>\*</sup>,4*R*<sup>\*</sup>,4*aS*<sup>\*</sup>,10*bS*<sup>\*</sup>)-*dia2-5c* in CDCl<sub>3</sub> at 500 MHz.

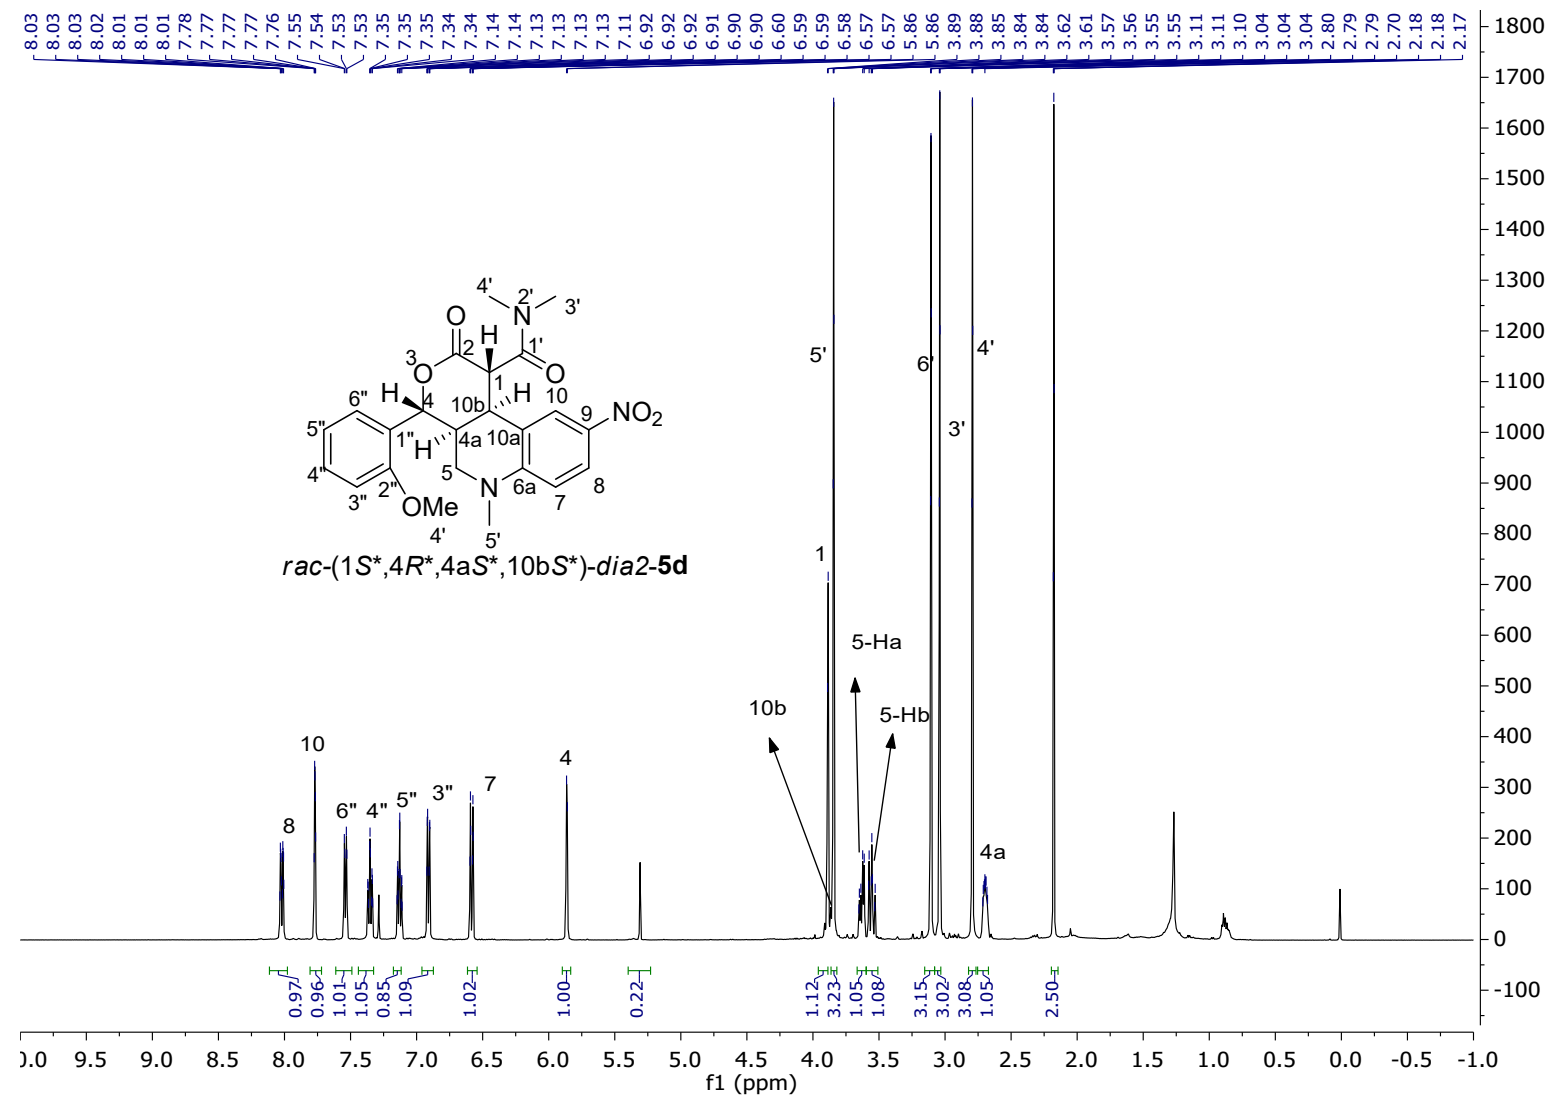

Figure S83. <sup>1</sup>H-NMR spectrum of the *rac*-(1*S*\*,4*R*\*,4*aS*\*,10*bS*\*)-*dia2-5d* in CDCl<sub>3</sub> at 500 MHz.

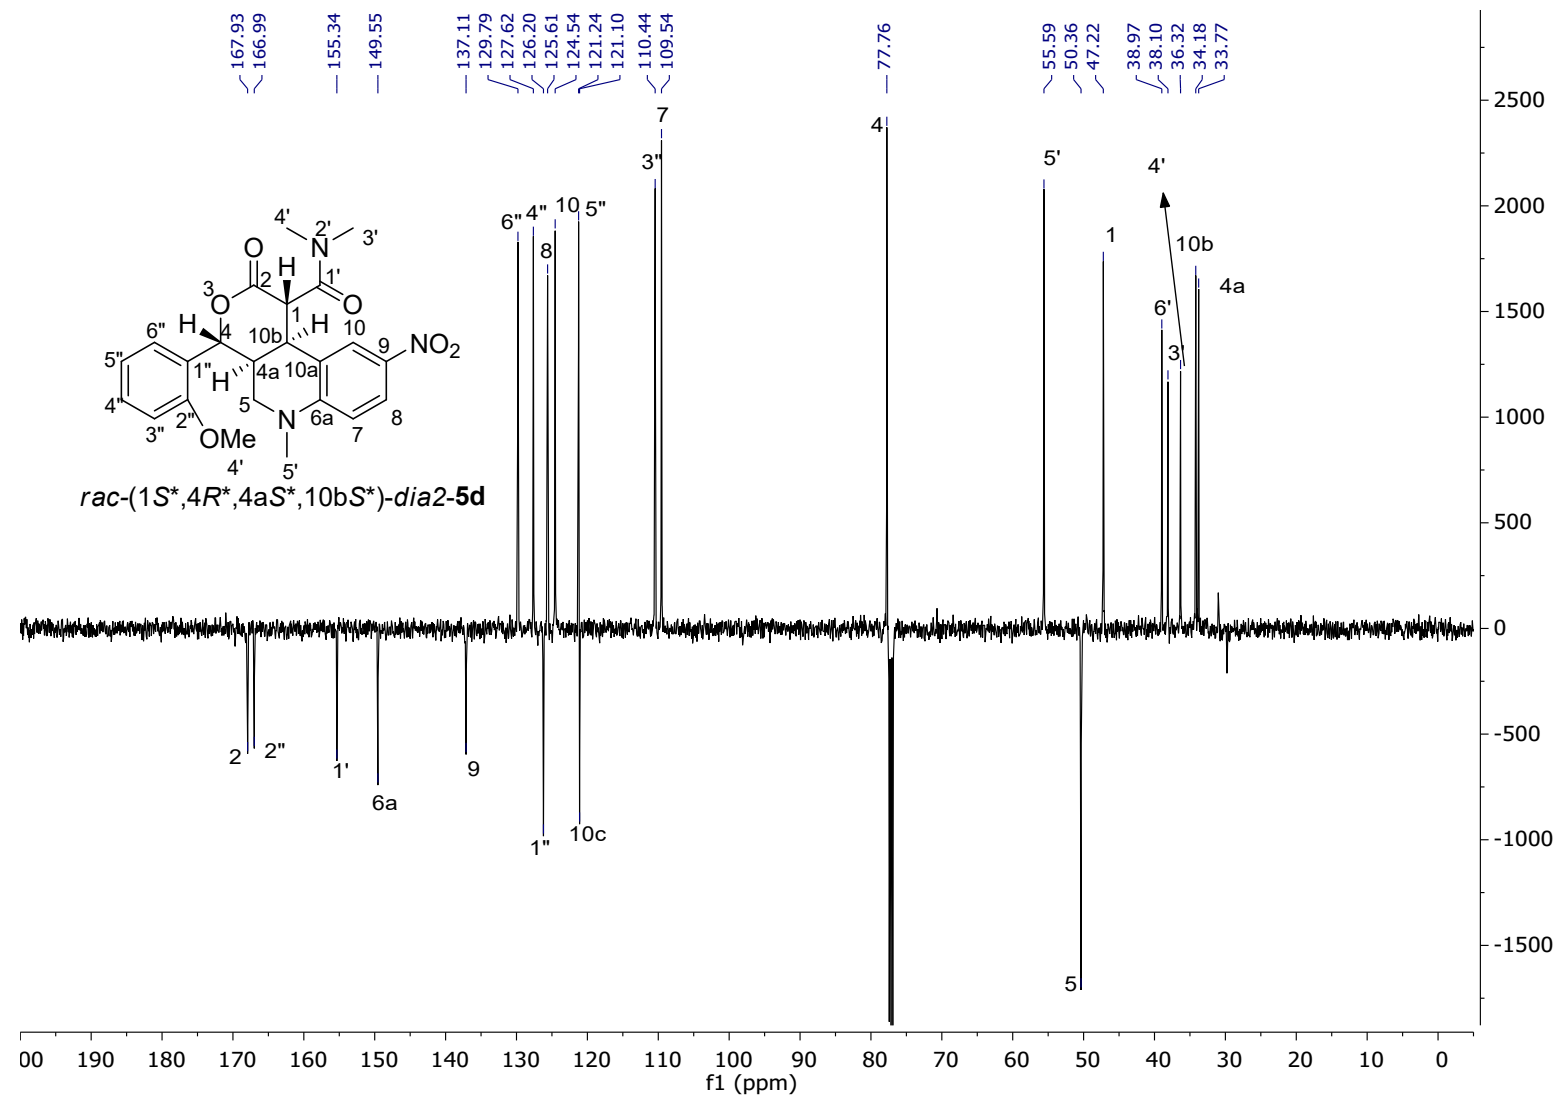

Figure S84. <sup>13</sup>C-NMR spectrum of the *rac*-(1*S*\*,4*R*\*,4*aS*\*,10*bS*\*)-**dia2-5d** in CDCl<sub>3</sub> at 125 MHz.

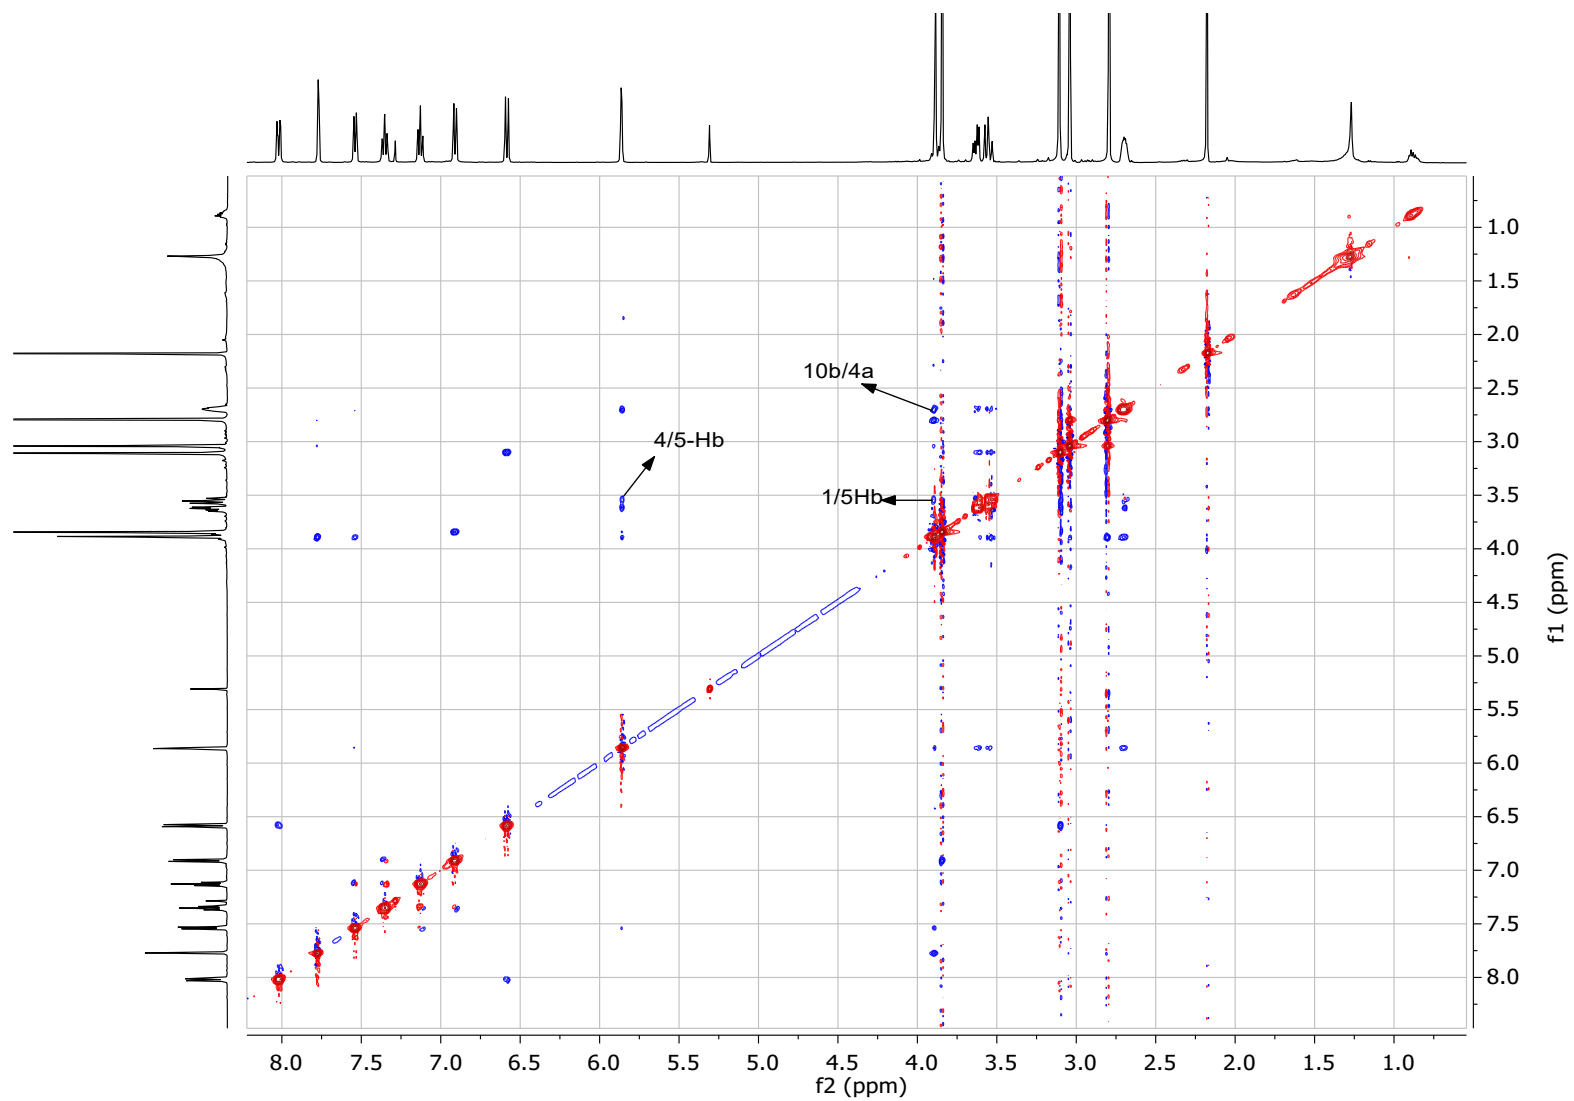

Figure S85. ROESY spectrum of the *rac*-(1*S*\*,4*R*\*,4*aS*\*,10*bS*\*)-*dia*2-**5d** in CDCl<sub>3</sub> at 500 MHz.

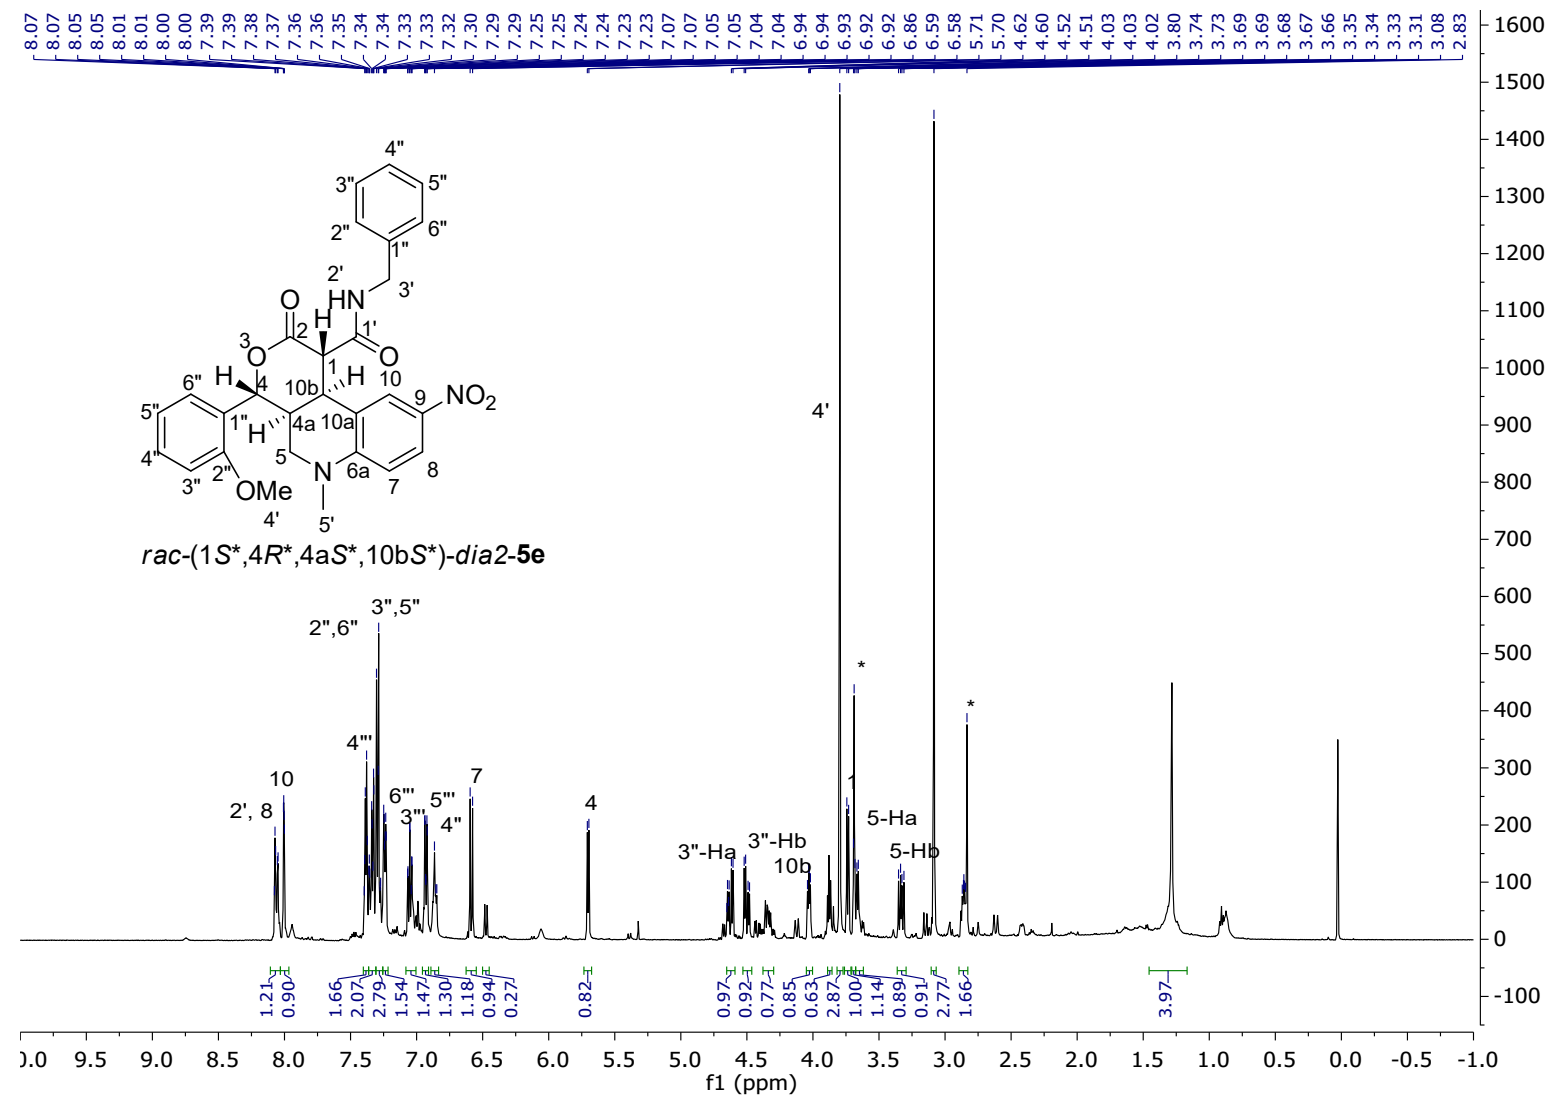

Figure S86. <sup>1</sup>H-NMR spectrum of the *rac*-(1*S*<sup>\*</sup>,4*R*<sup>\*</sup>,4*aS*<sup>\*</sup>,10*bS*<sup>\*</sup>)-*dia*2-**5e** in CDCl<sub>3</sub> at 500 MHz.



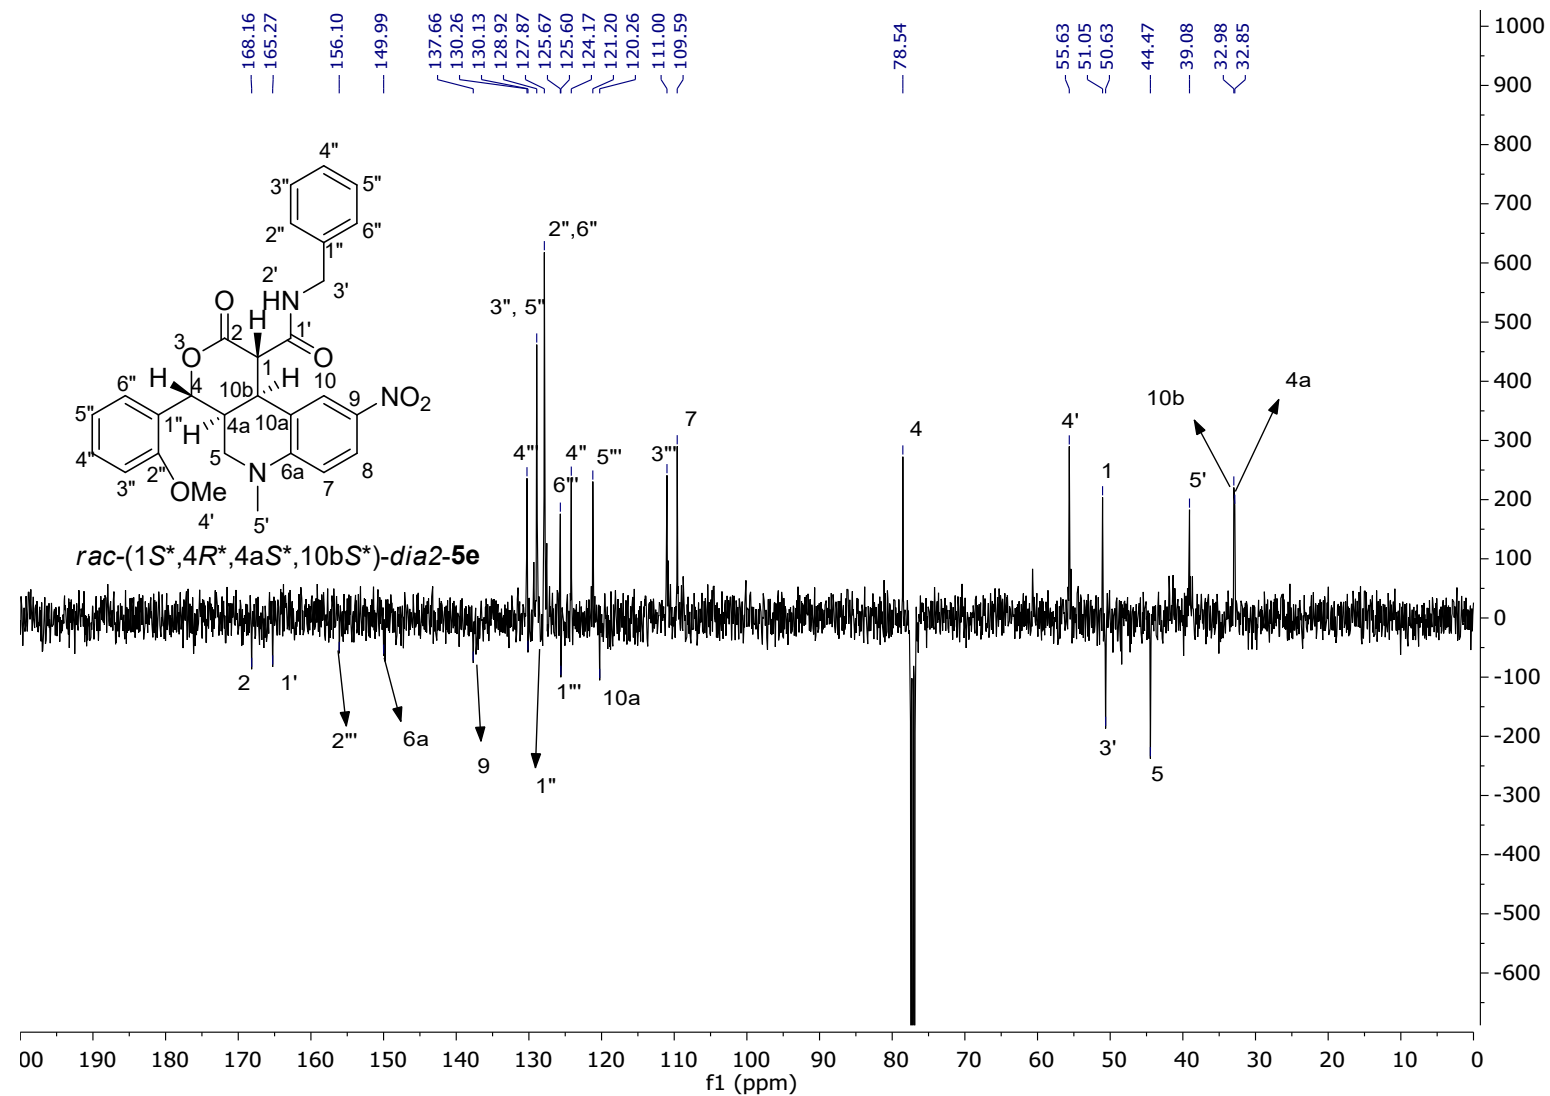

Figure S87. <sup>13</sup>C-NMR spectrum of the *rac*-(1*S*<sup>\*</sup>,4*R*<sup>\*</sup>,4*aS*<sup>\*</sup>,10*bS*<sup>\*</sup>)-*dia2-5e* in CDCl<sub>3</sub> at 125 MHz.

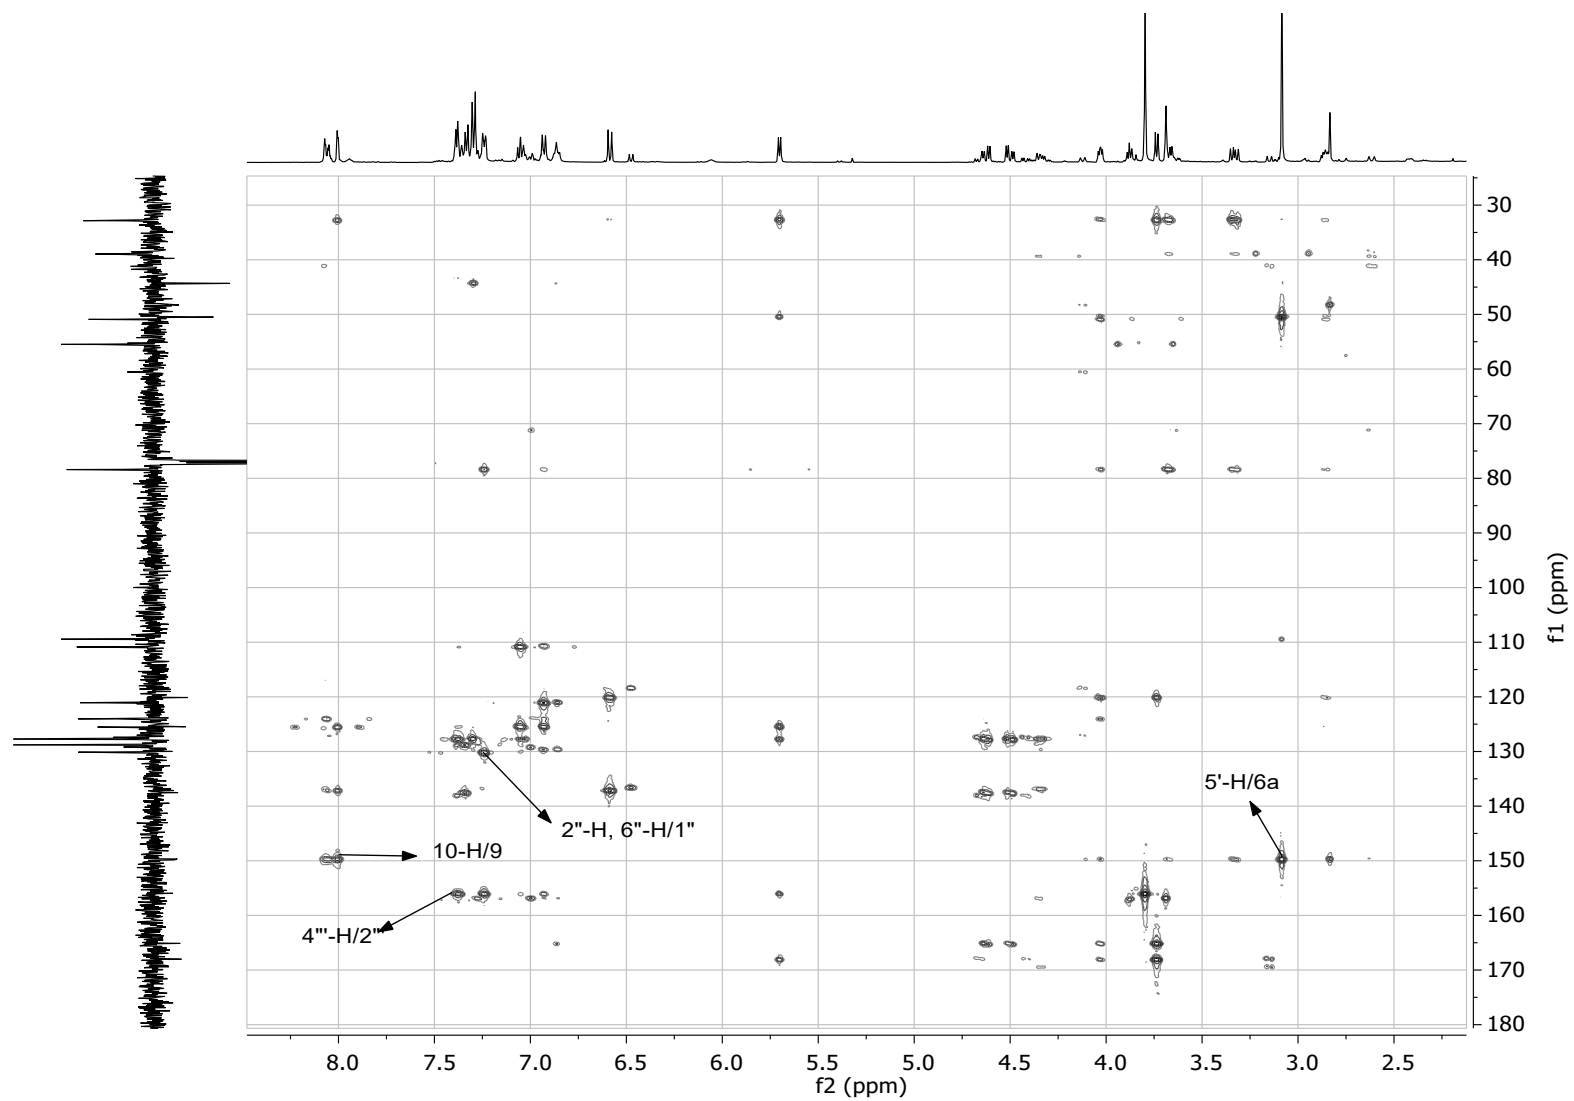

Figure S88. HMBC spectrum of the *rac*-(1*S*<sup>\*</sup>,4*R*<sup>\*</sup>,4*aS*<sup>\*</sup>,10*bS*<sup>\*</sup>)-*dia2-5e* in CDCl<sub>3</sub> at 500 MHz.

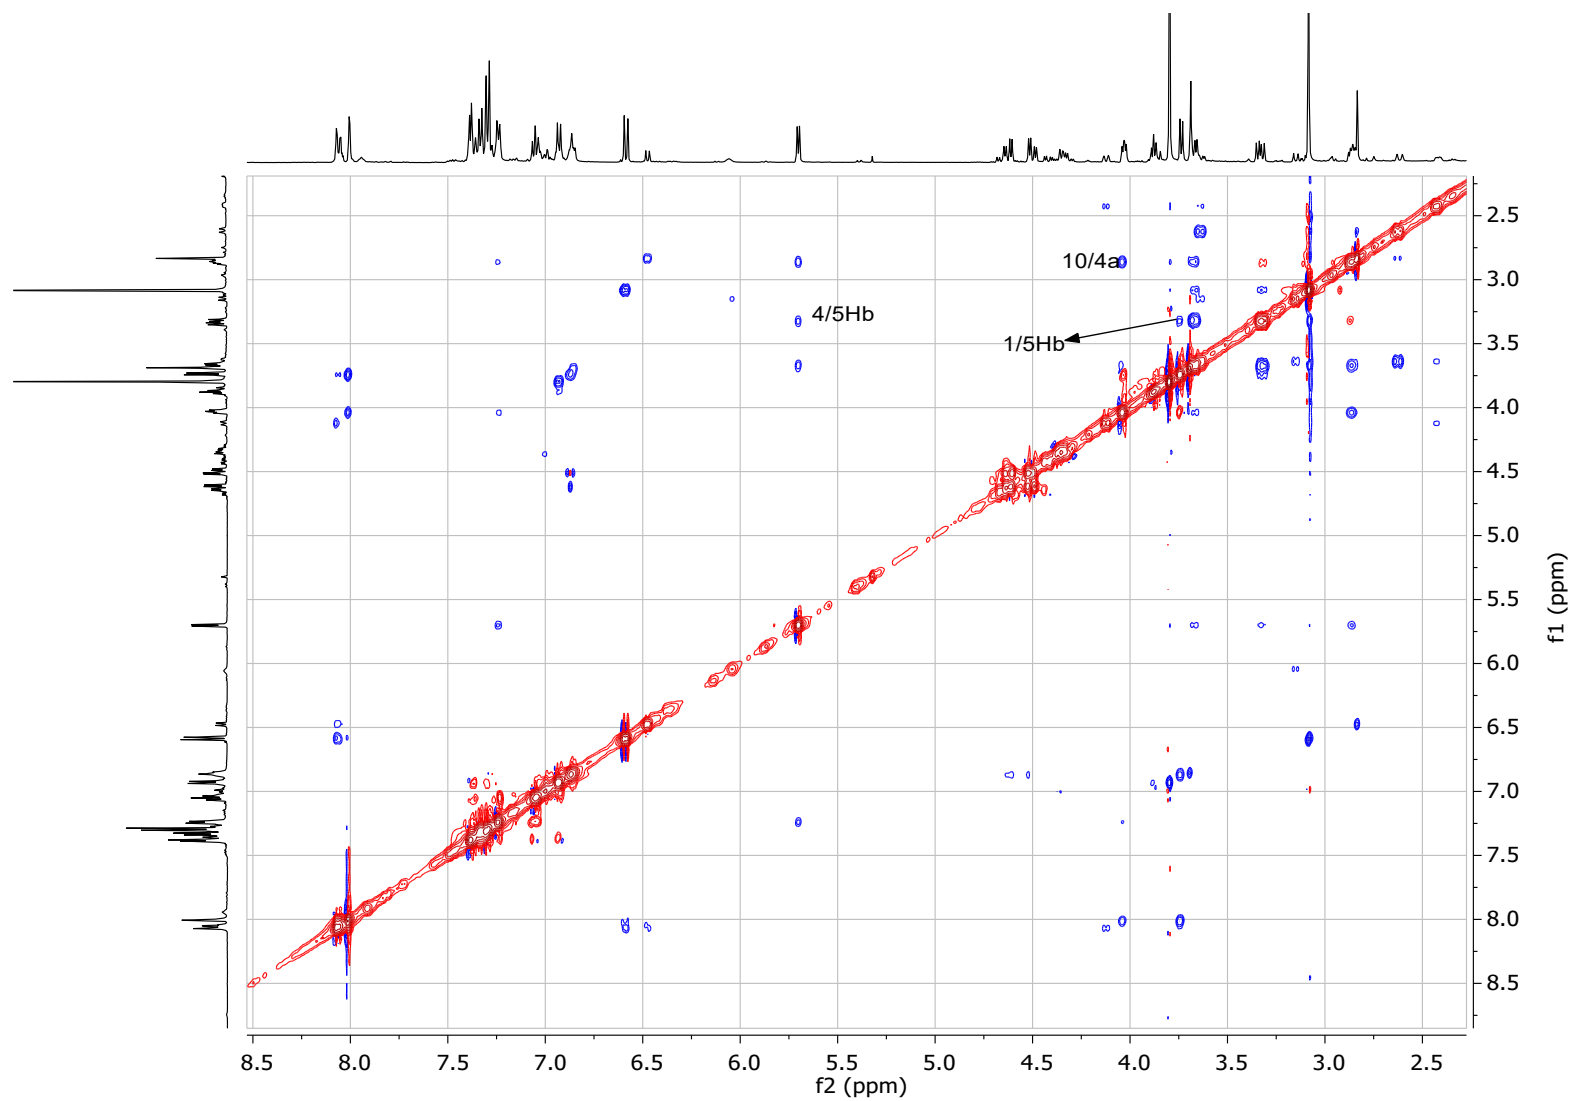

Figure S89. ROESY spectrum of the *rac*-(1*S*\*,4*R*\*,4*aS*\*,10*bS*\*)-*dia2-5e* in CDCl<sub>3</sub> at 500 MHz.

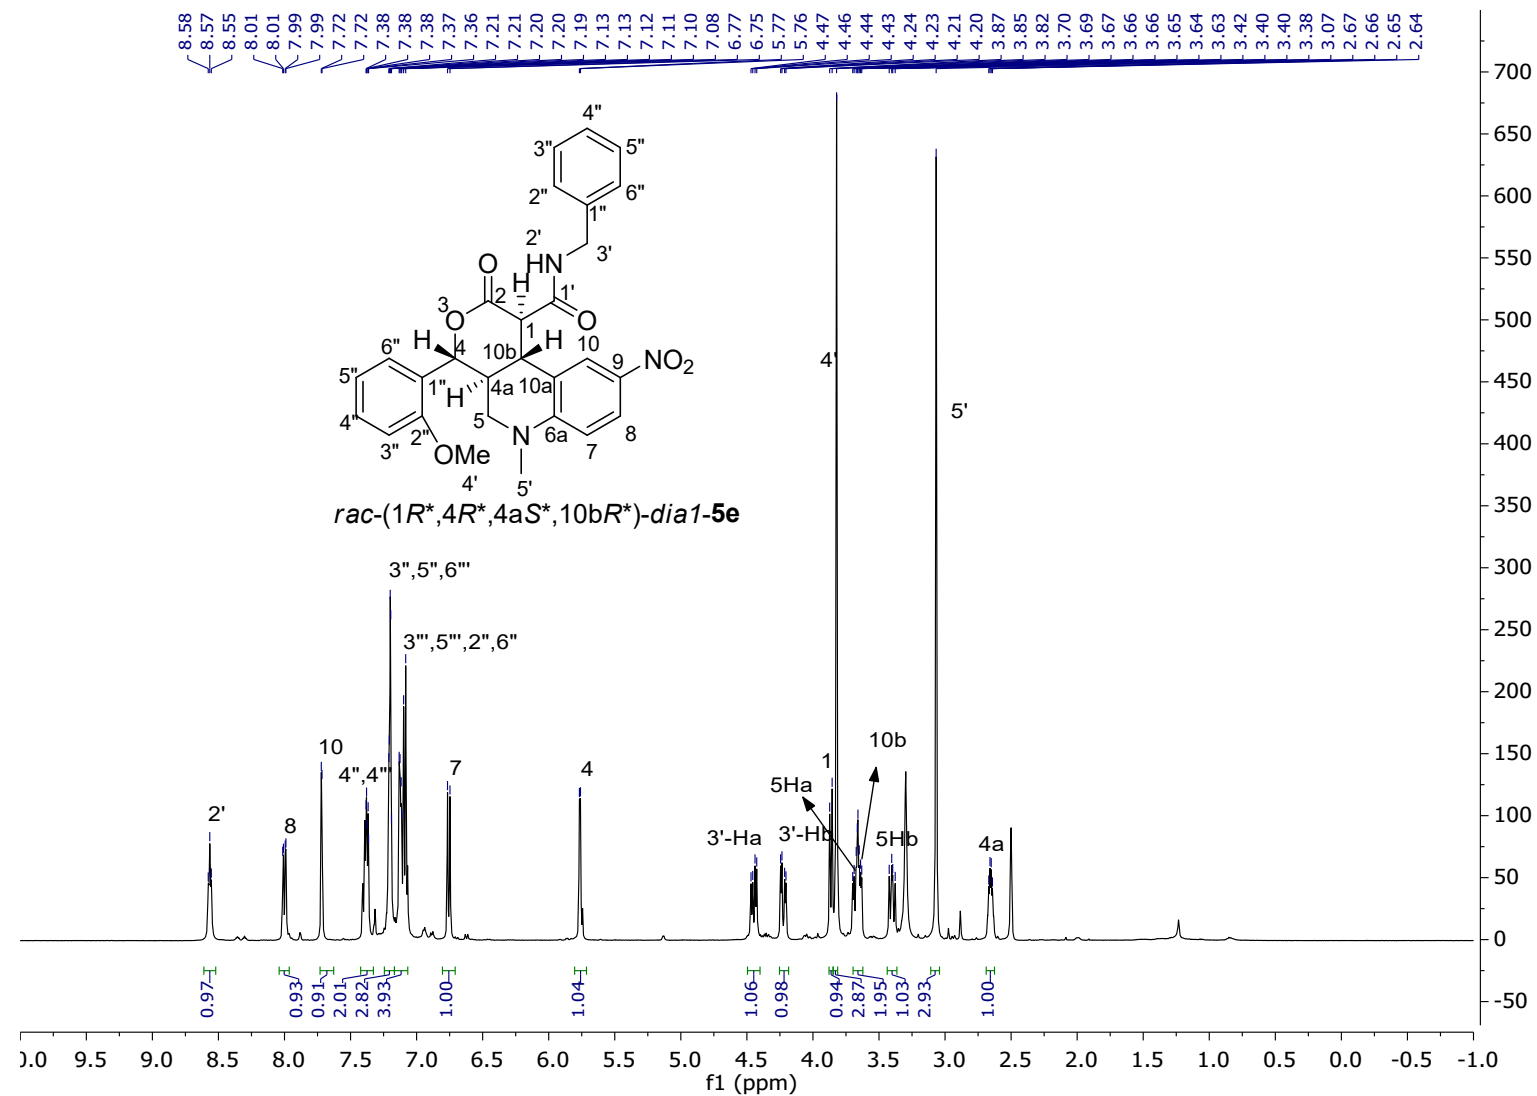

Figure S90. <sup>1</sup>H-NMR spectrum of the *rac*-(1*R*\*,4*R*\*,4*aS*\*,10*bR*\*)-*dia*1-**5e** in CDCl<sub>3</sub> at 500 MHz.

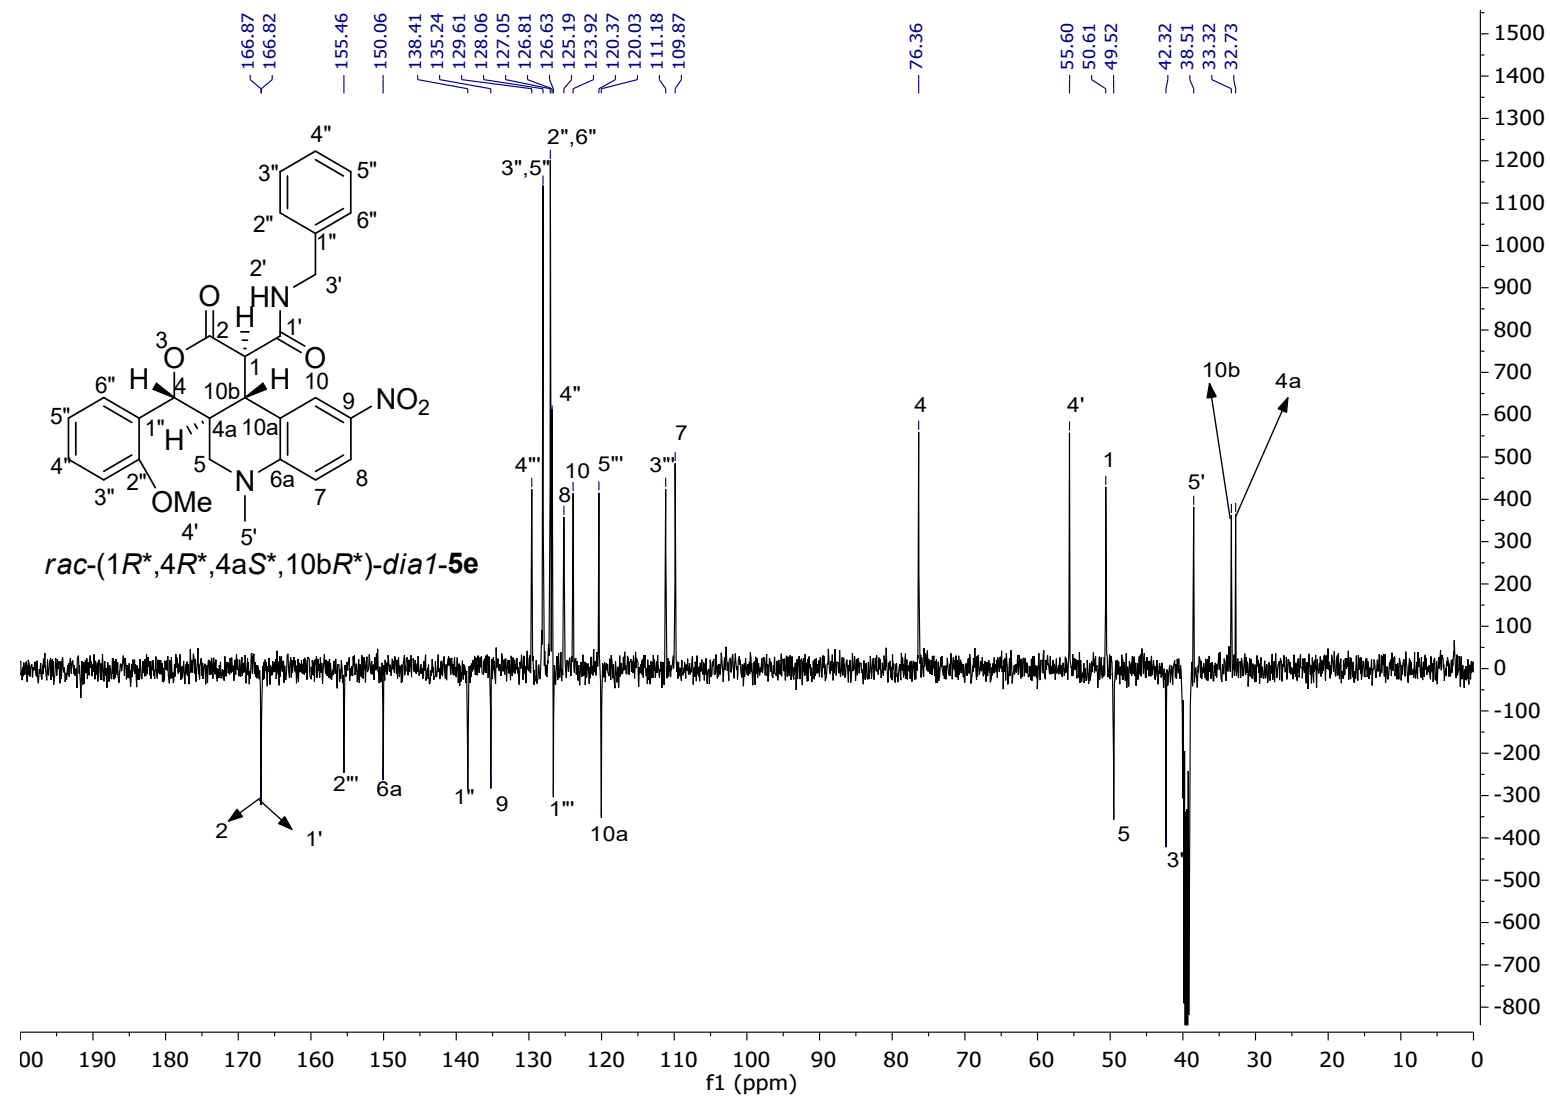

Figure S91. <sup>13</sup>C-NMR spectrum of the *rac*-(1*R*<sup>\*</sup>,4*R*<sup>\*</sup>,4*aS*<sup>\*</sup>,10*bR*<sup>\*</sup>)-*dia1-5e* in DMSO-d<sub>6</sub> at 125 MHz.

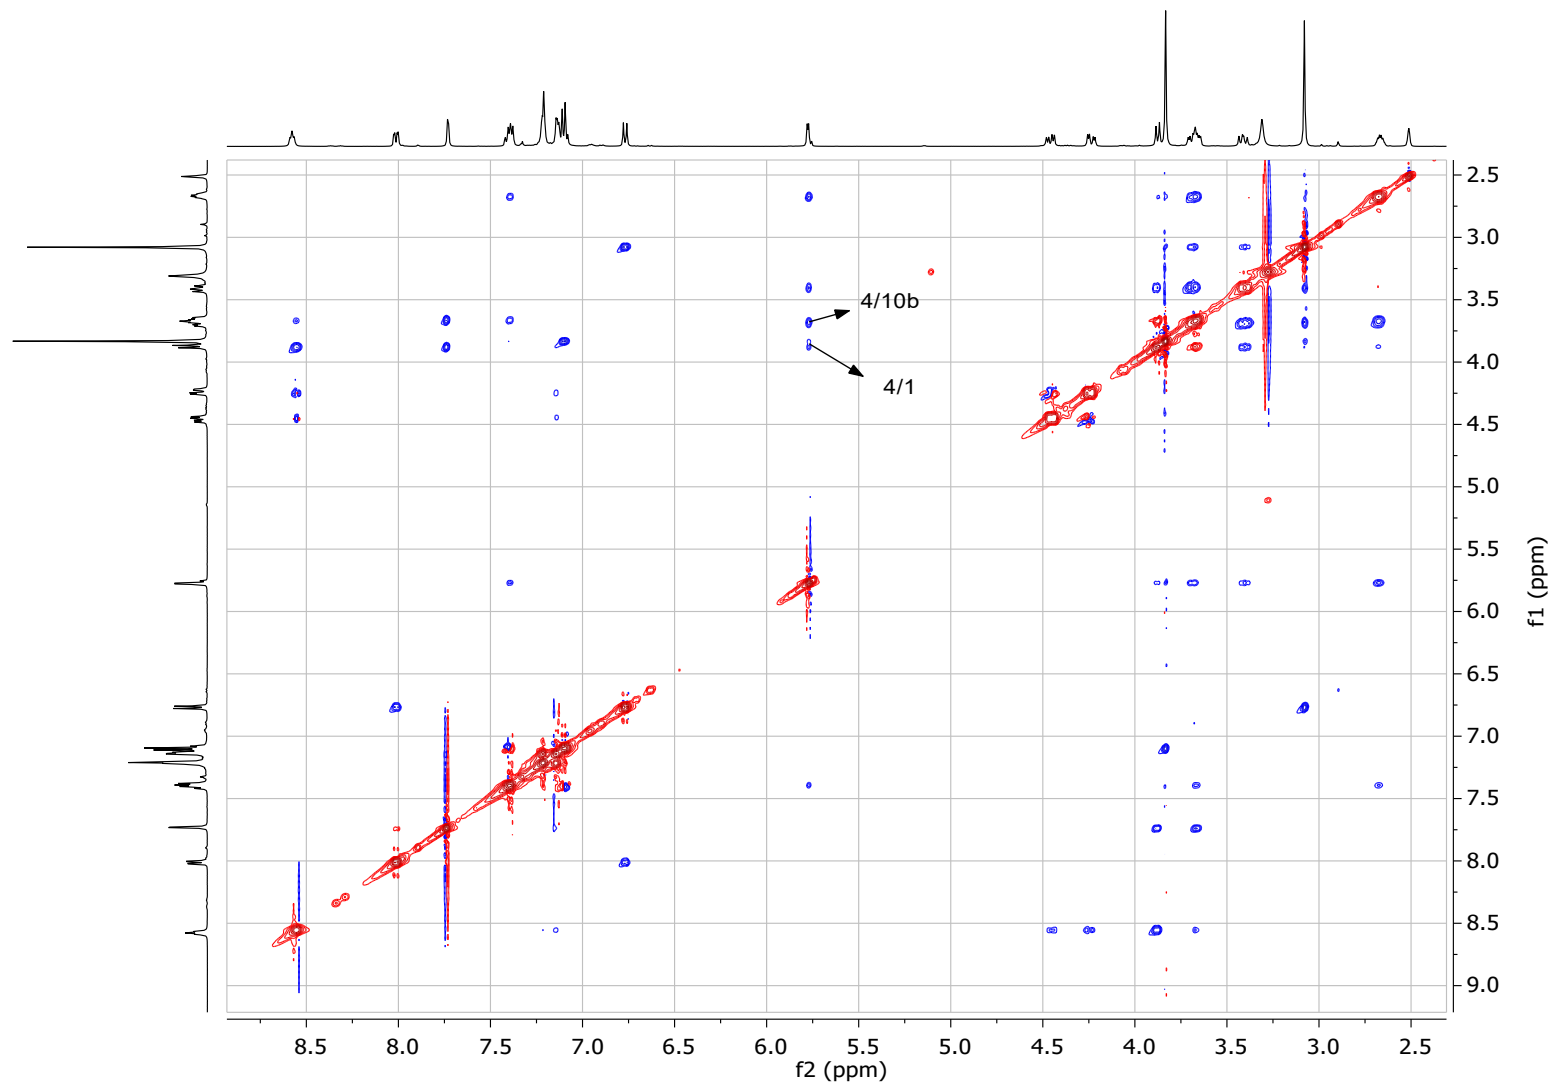

Figure S92. ROESY spectrum of the *rac*-(1*R*\*,4*R*\*,4*aS*\*,10*bR*\*)-*dial*-5e in CDCl<sub>3</sub> at 500 MHz.



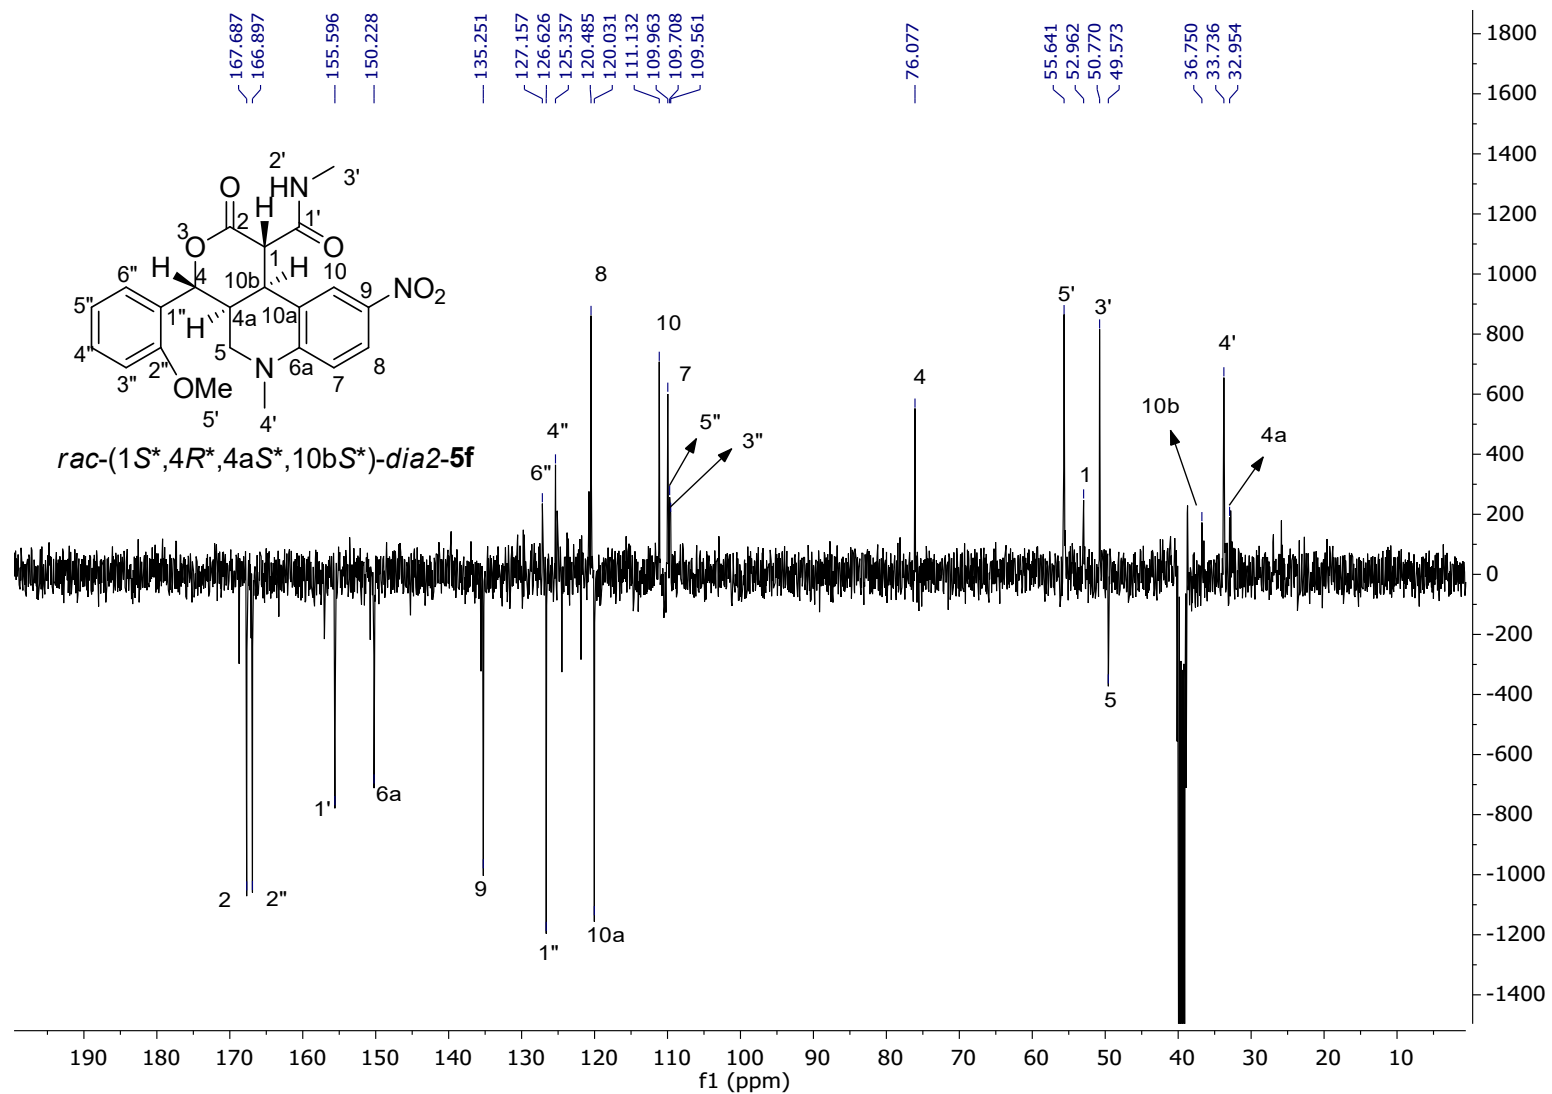

Figure S94. <sup>13</sup>C-NMR spectrum of the *rac*-(1*S*<sup>\*</sup>,4*R*<sup>\*</sup>,4*aS*<sup>\*</sup>,10*bS*<sup>\*</sup>)-*dia2-5f* in DMSO-*d*<sub>6</sub> at 100 MHz.



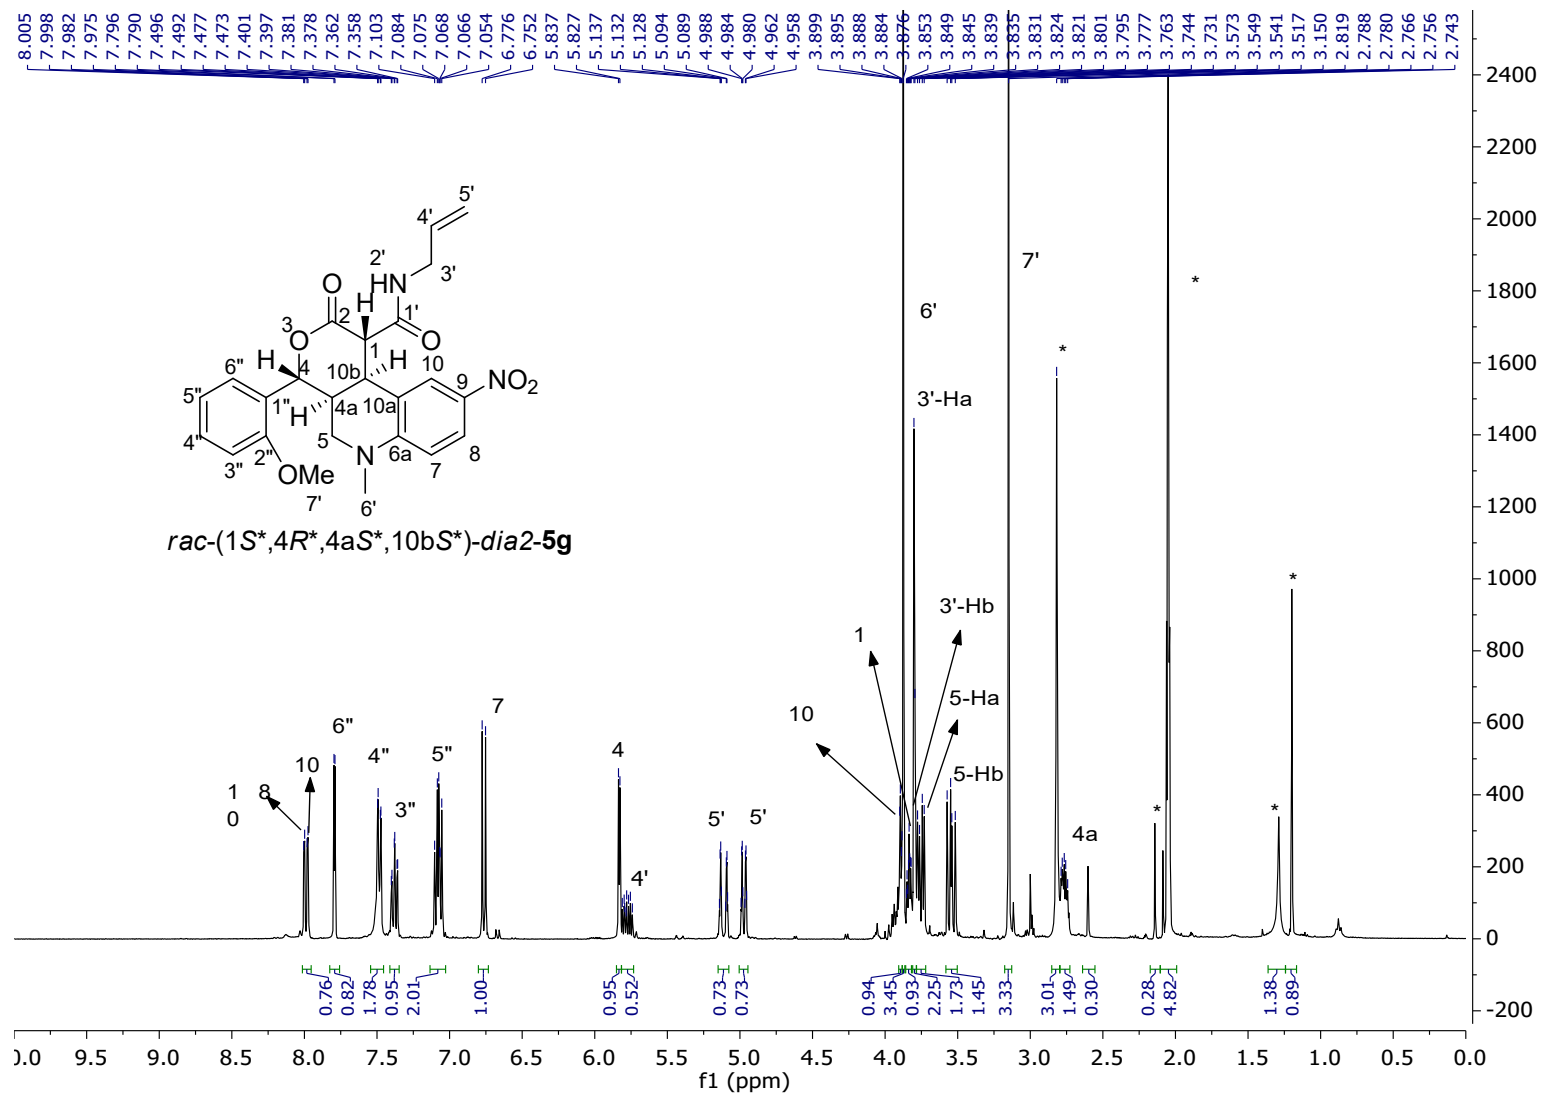

Figure S95. <sup>1</sup>H-NMR spectrum of the *rac*-(1*S*<sup>\*</sup>,4*R*<sup>\*</sup>,4*aS*<sup>\*</sup>,10*bS*<sup>\*</sup>)-*dia2-5g* in CDCl<sub>3</sub> at 400 MHz.

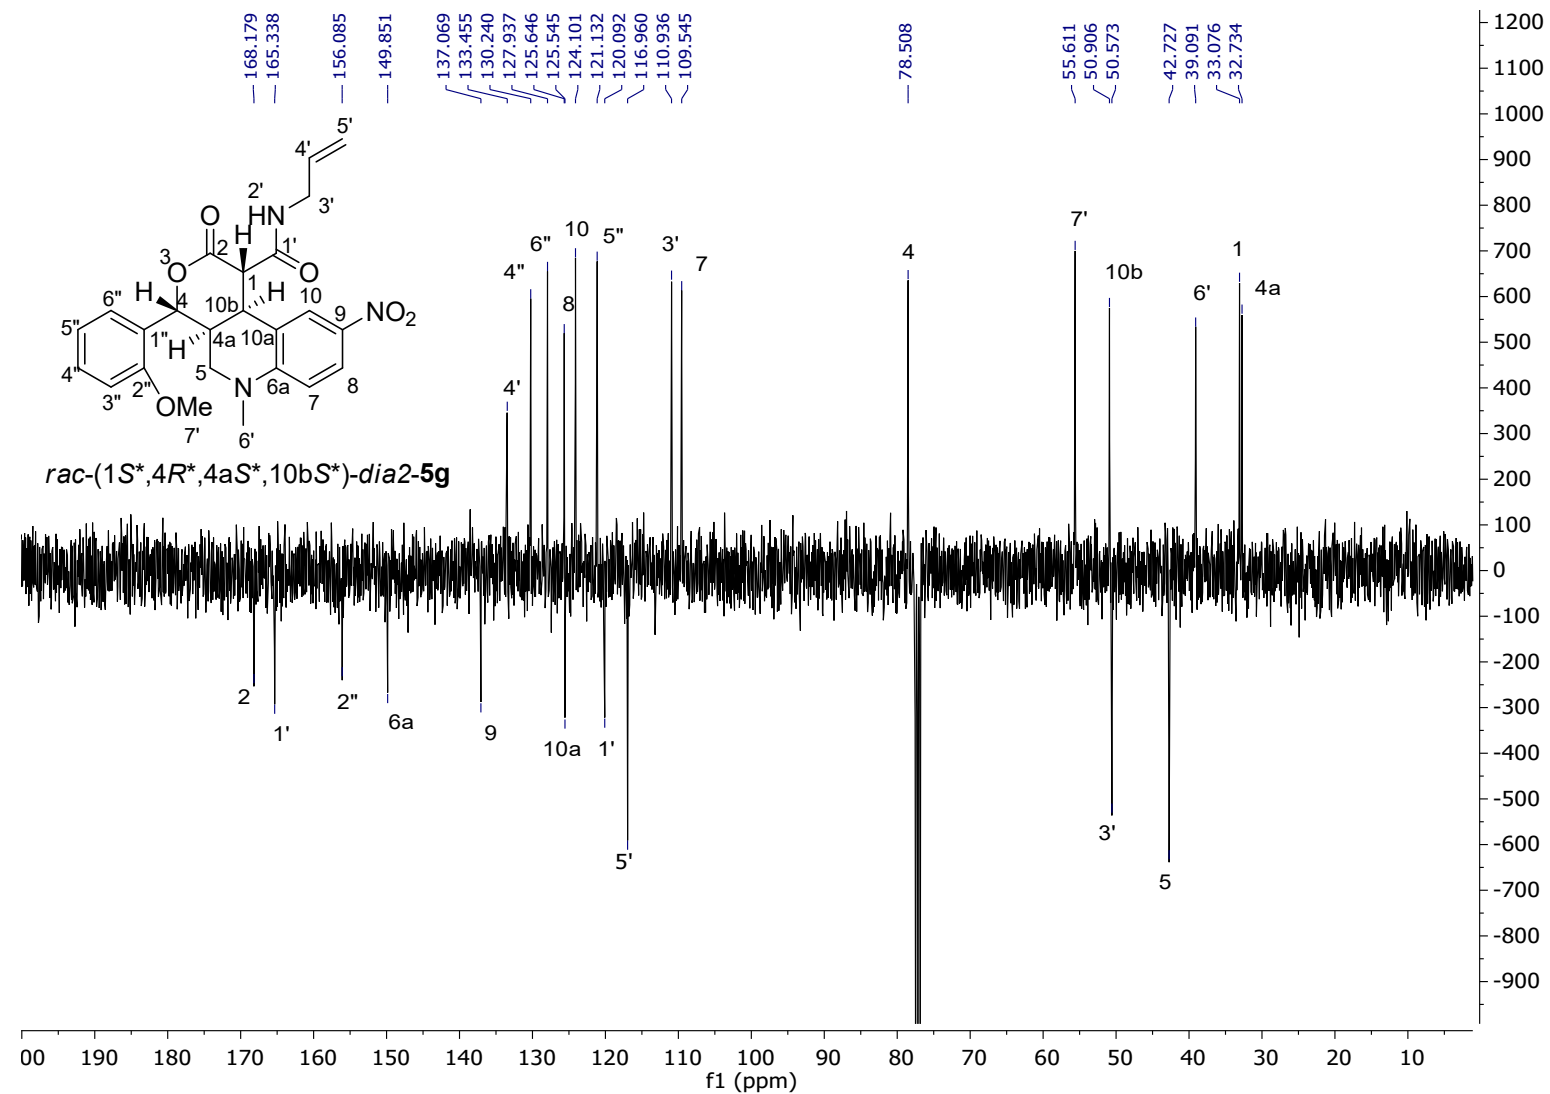

Figure S96. <sup>13</sup>C-NMR spectrum of the *rac*-(1*S*<sup>\*</sup>,4*R*<sup>\*</sup>,4*aS*<sup>\*</sup>,10*bS*<sup>\*</sup>)-**dia2-5g** in CDCl<sub>3</sub> at 100 MHz.

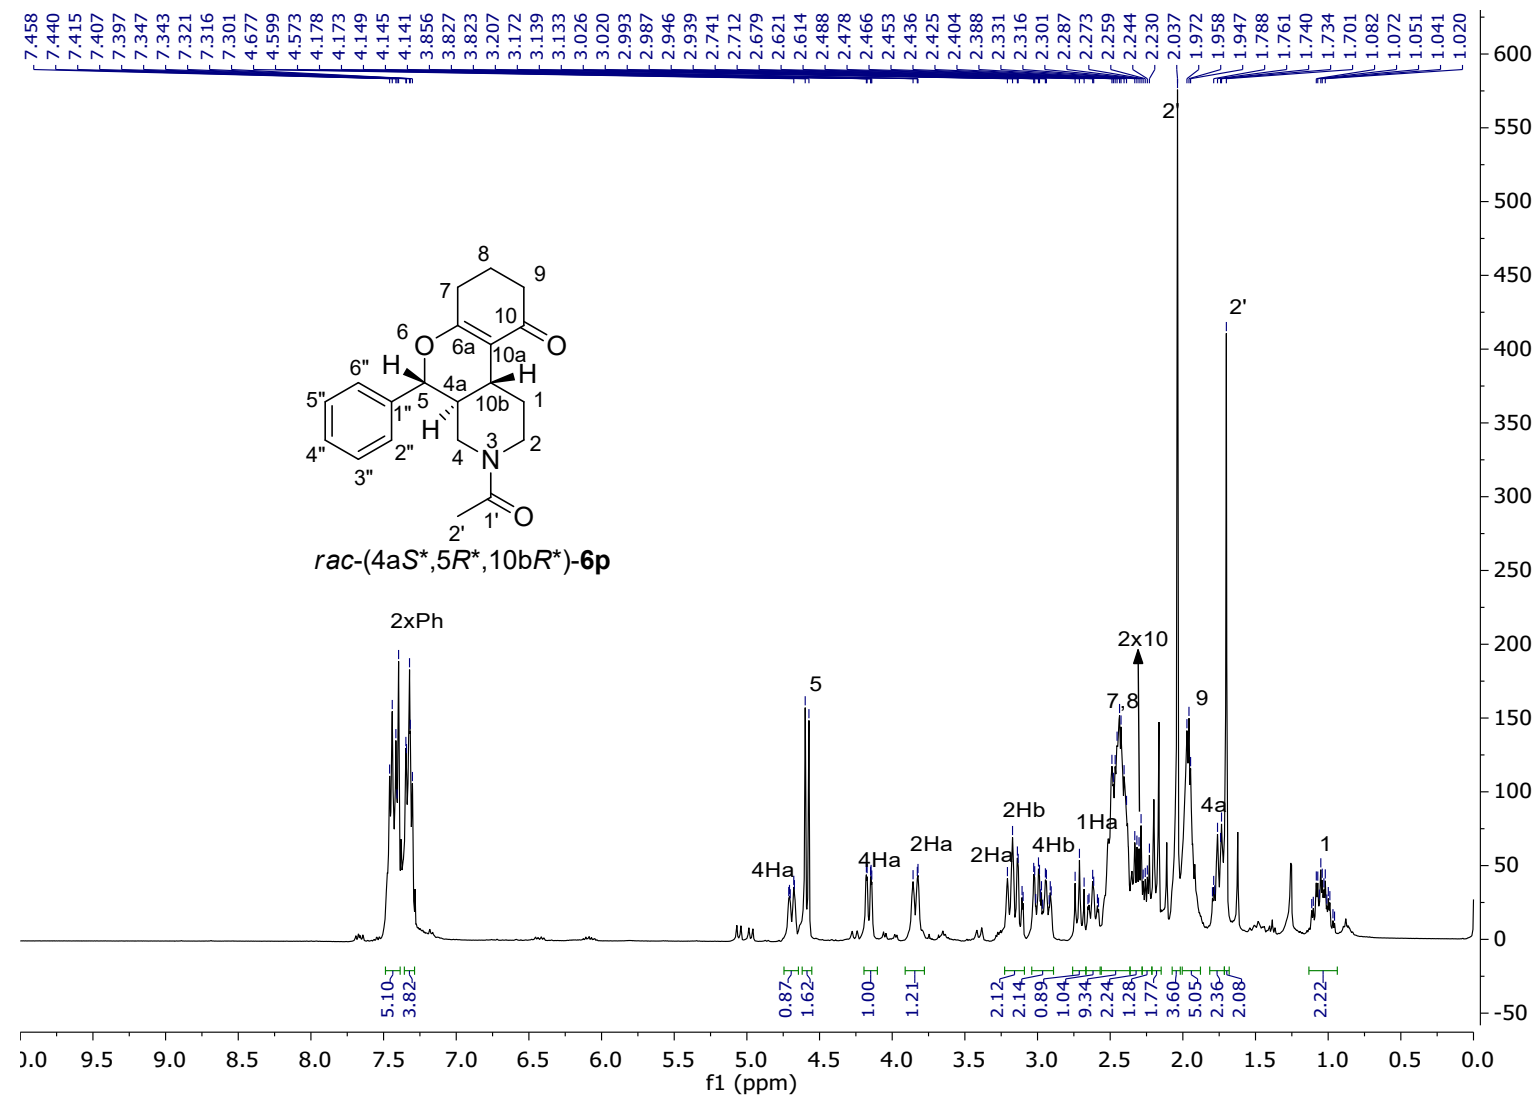

Figure S97.  $^1\text{H}$ -NMR spectrum of the *rac*-(4a*S*\*,5*R*\*,10b*R*\*)-6p in  $\text{CDCl}_3$  at 400 MHz.

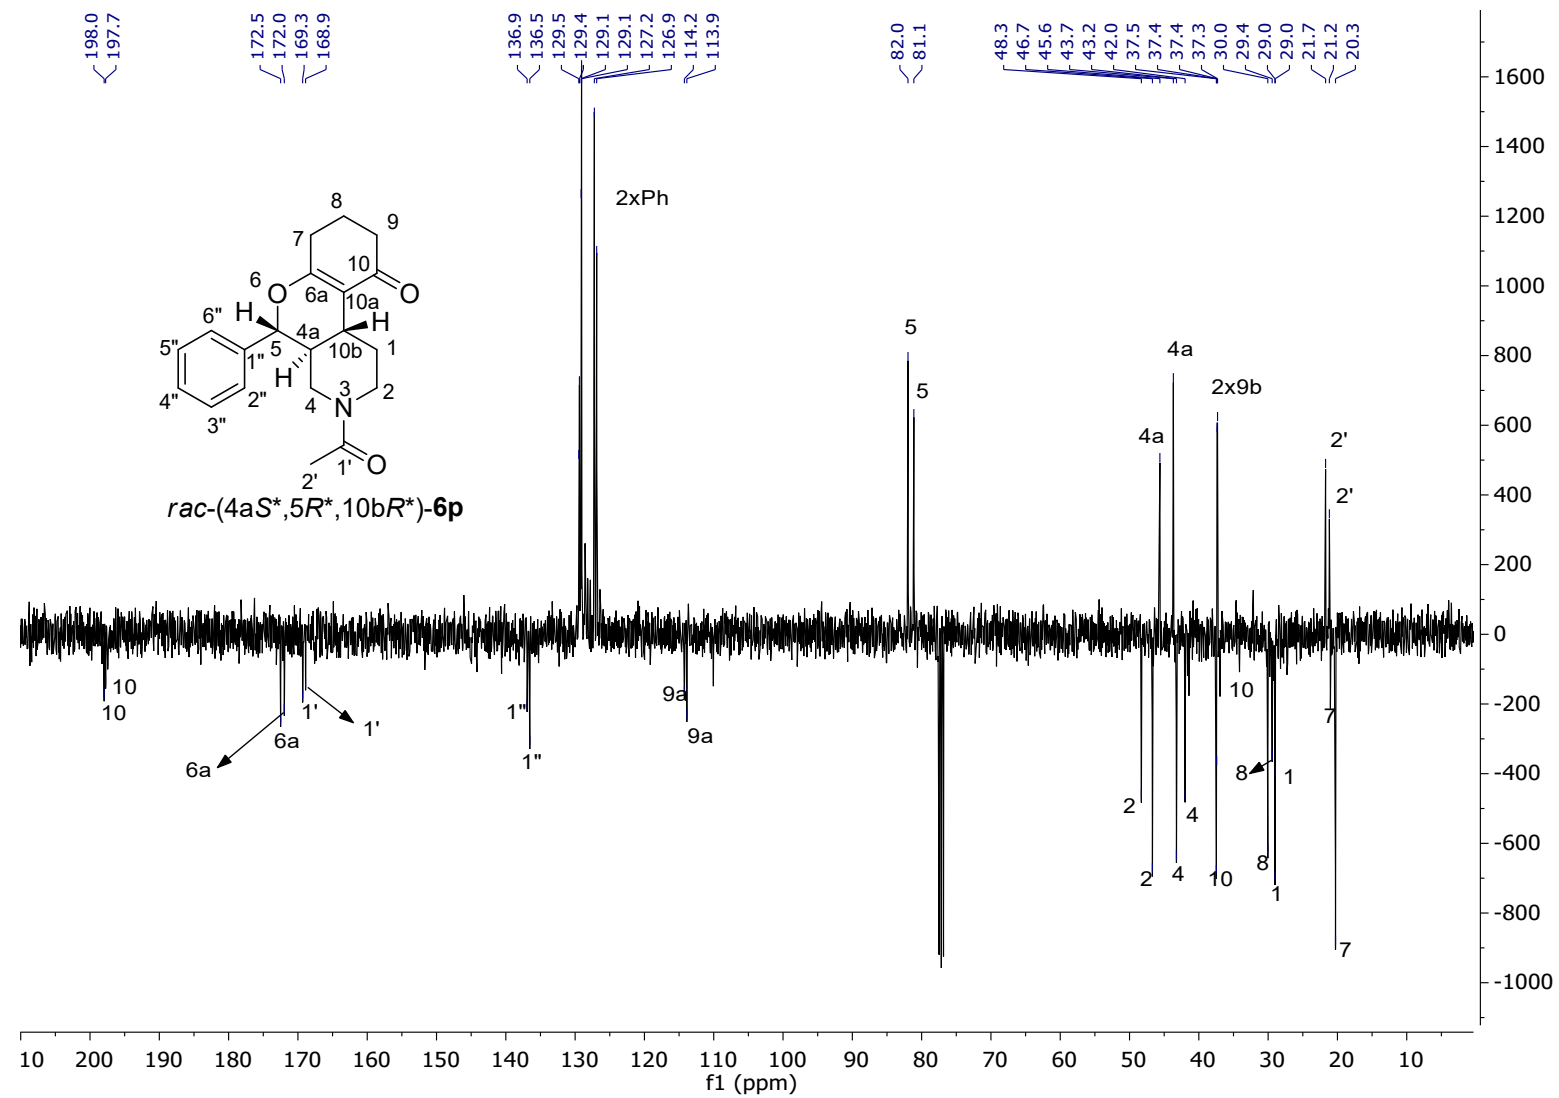

Figure S98. <sup>13</sup>C-NMR spectrum of the *rac*-(4a*S*\*,5*R*\*,10b*R*\*)-6p in CDCl<sub>3</sub> at 100 MHz.

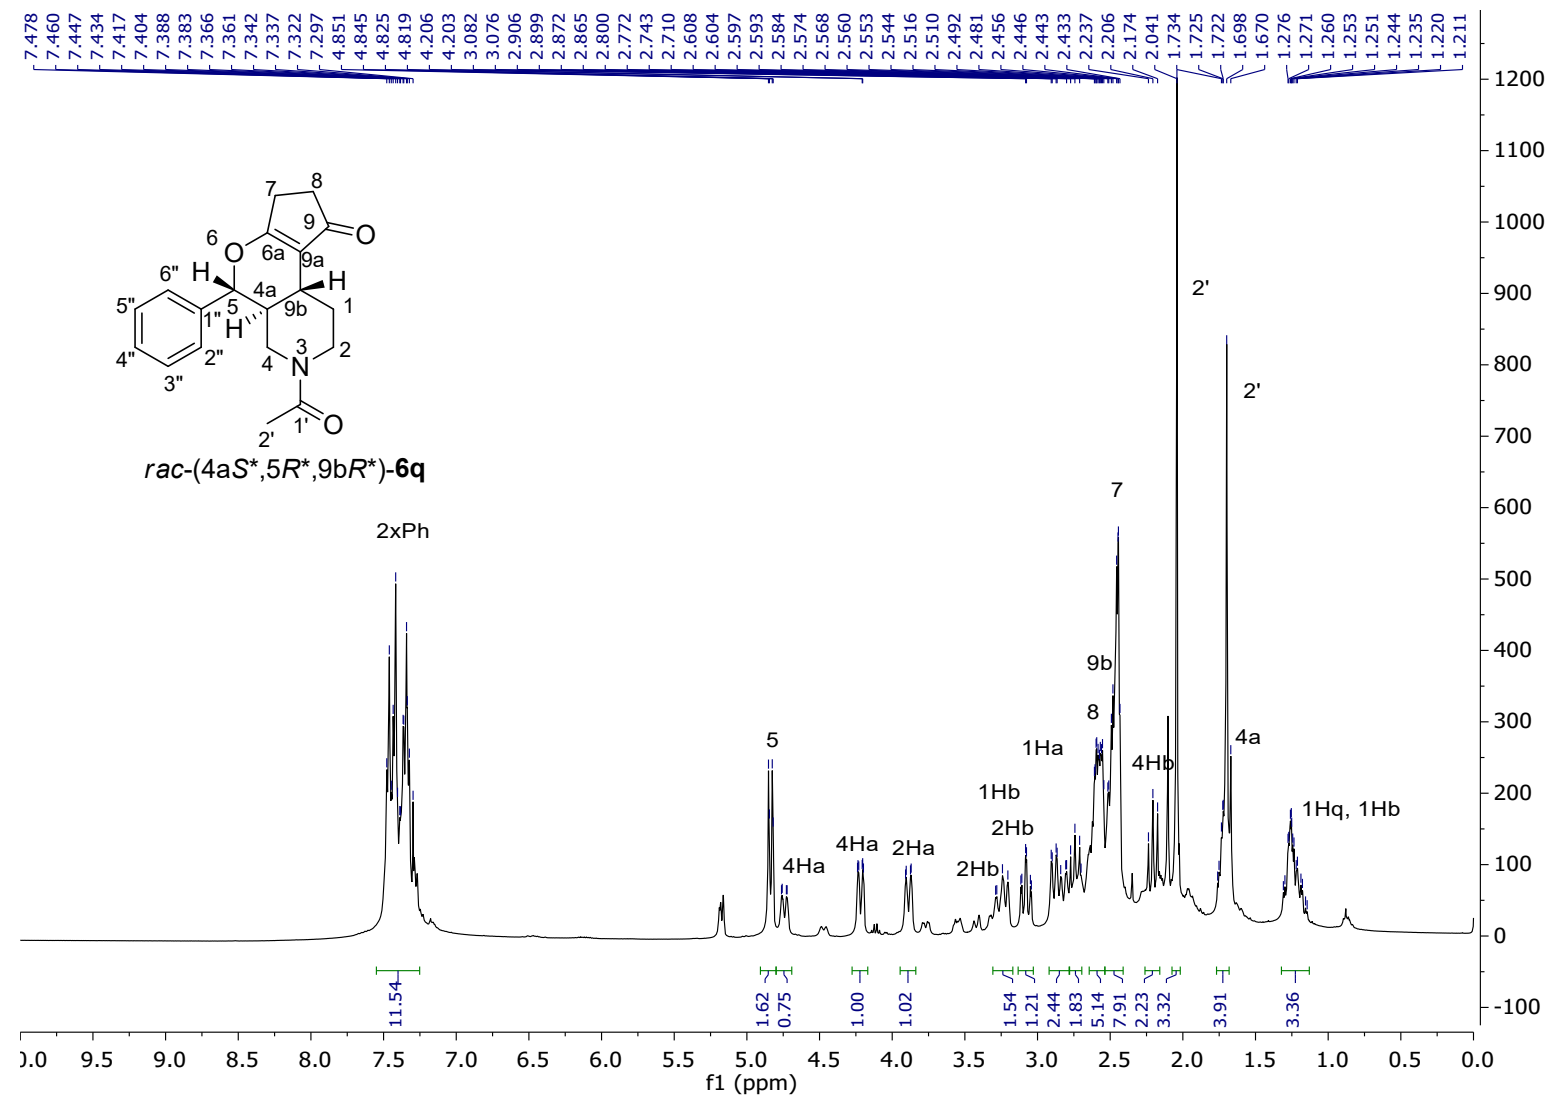

Figure S99. <sup>1</sup>H-NMR spectrum of the *rac*-(4a*S*<sup>\*</sup>,5*R*<sup>\*</sup>,9b*R*<sup>\*</sup>)-**6q** in CDCl<sub>3</sub> at 400 MHz.

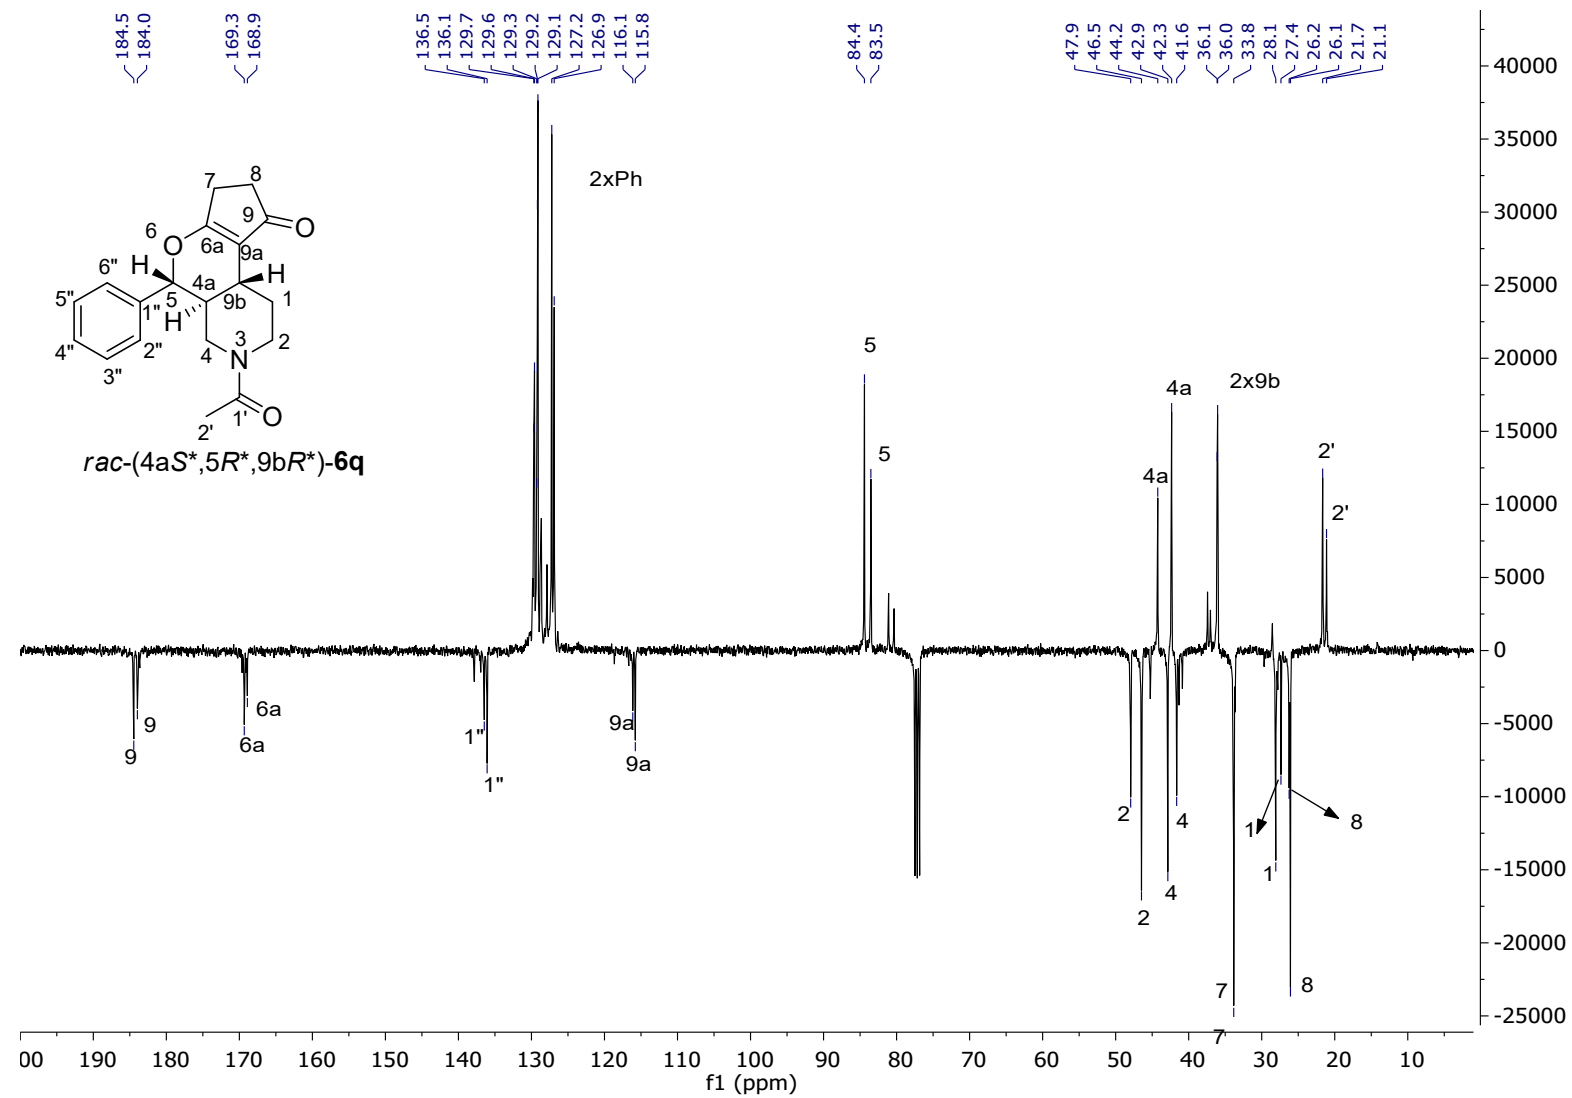

Figure S100.  $^{13}\text{C}$ -NMR spectrum of the *rac*-(4a*S*\*,5*R*\*,9b*R*\*)-6q in  $\text{CDCl}_3$  at 100 MHz.

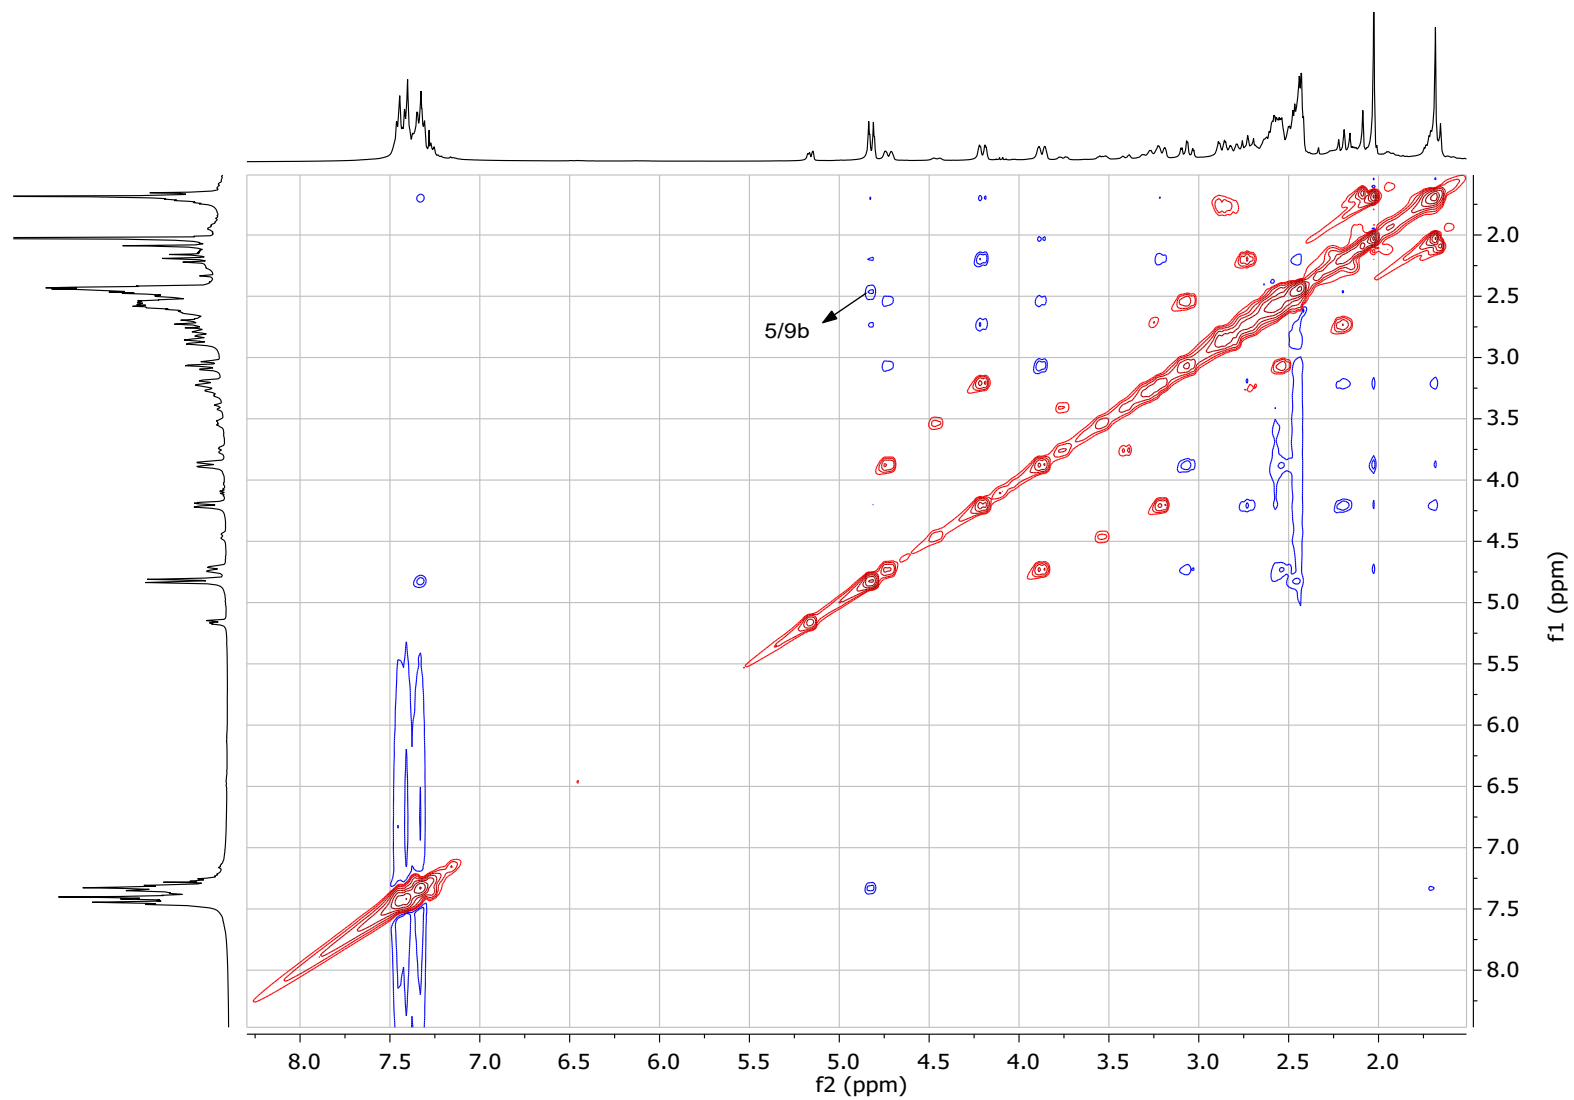

Figure S101. NOESY spectrum of the *rac*-(4a*S*<sup>\*</sup>,5*R*<sup>\*</sup>,9b*R*<sup>\*</sup>)-**6q** in CDCl<sub>3</sub> at 400 MHz.

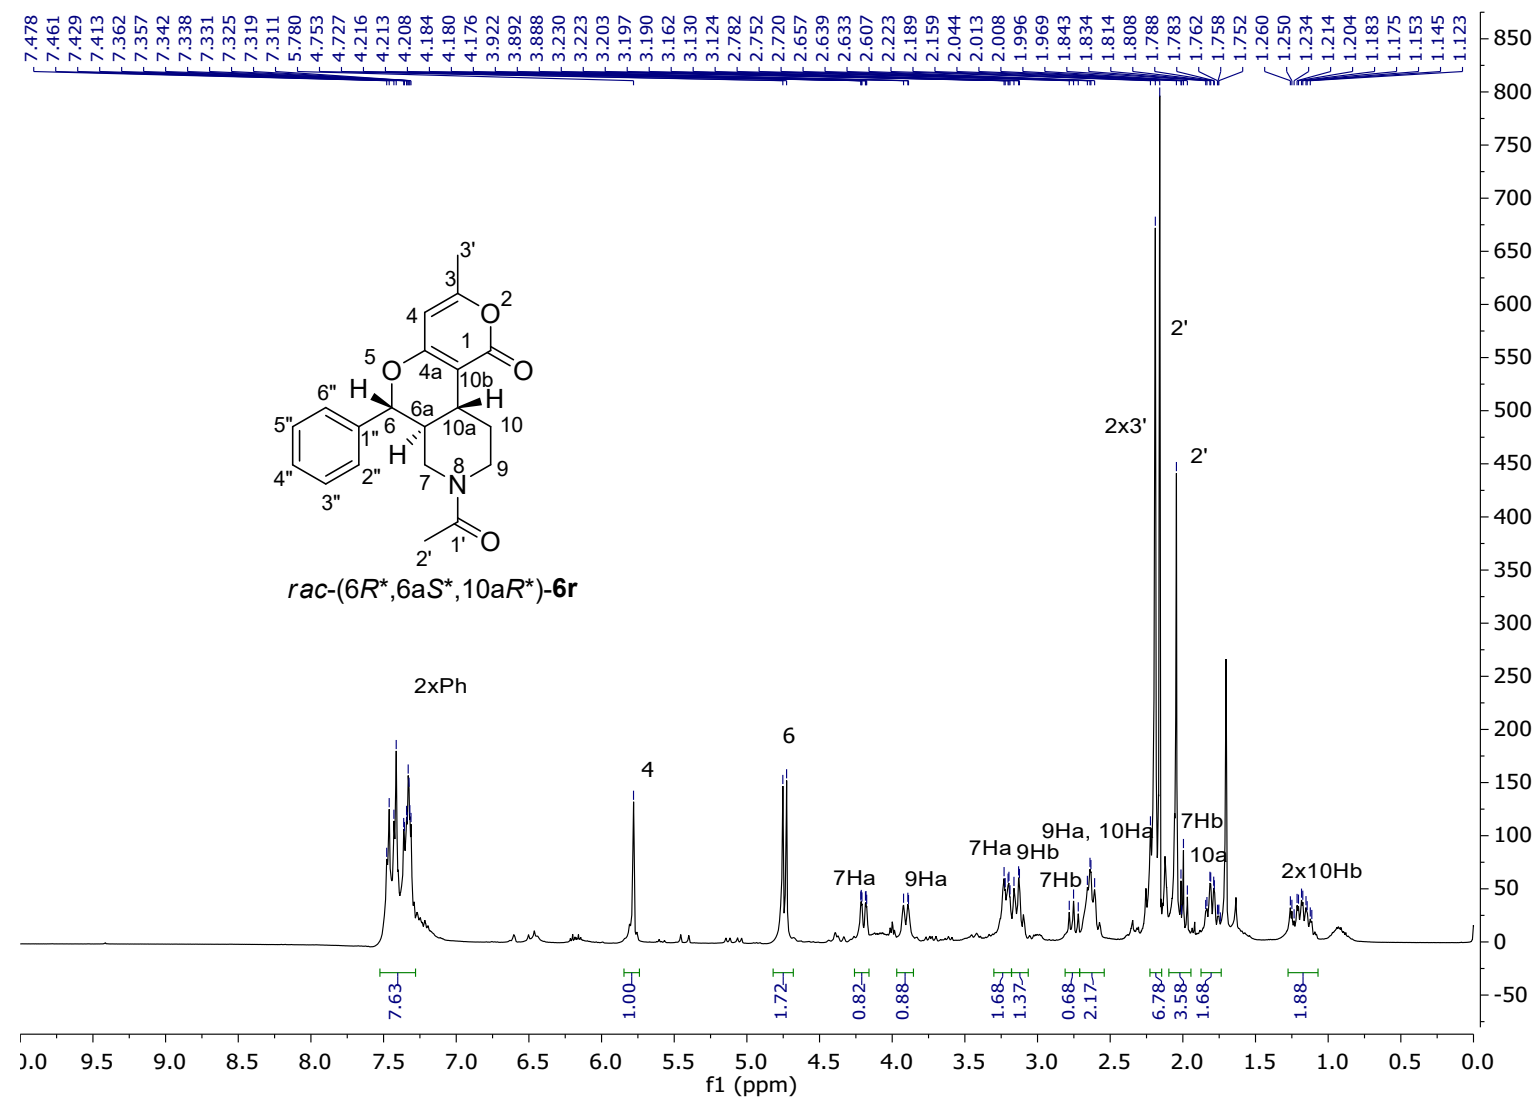

Figure S102. <sup>1</sup>H-NMR spectrum of the *rac*-(6*R*<sup>\*</sup>,6*aS*<sup>\*</sup>,10*aR*<sup>\*</sup>)-**6r** in CDCl<sub>3</sub> at 400 MHz.



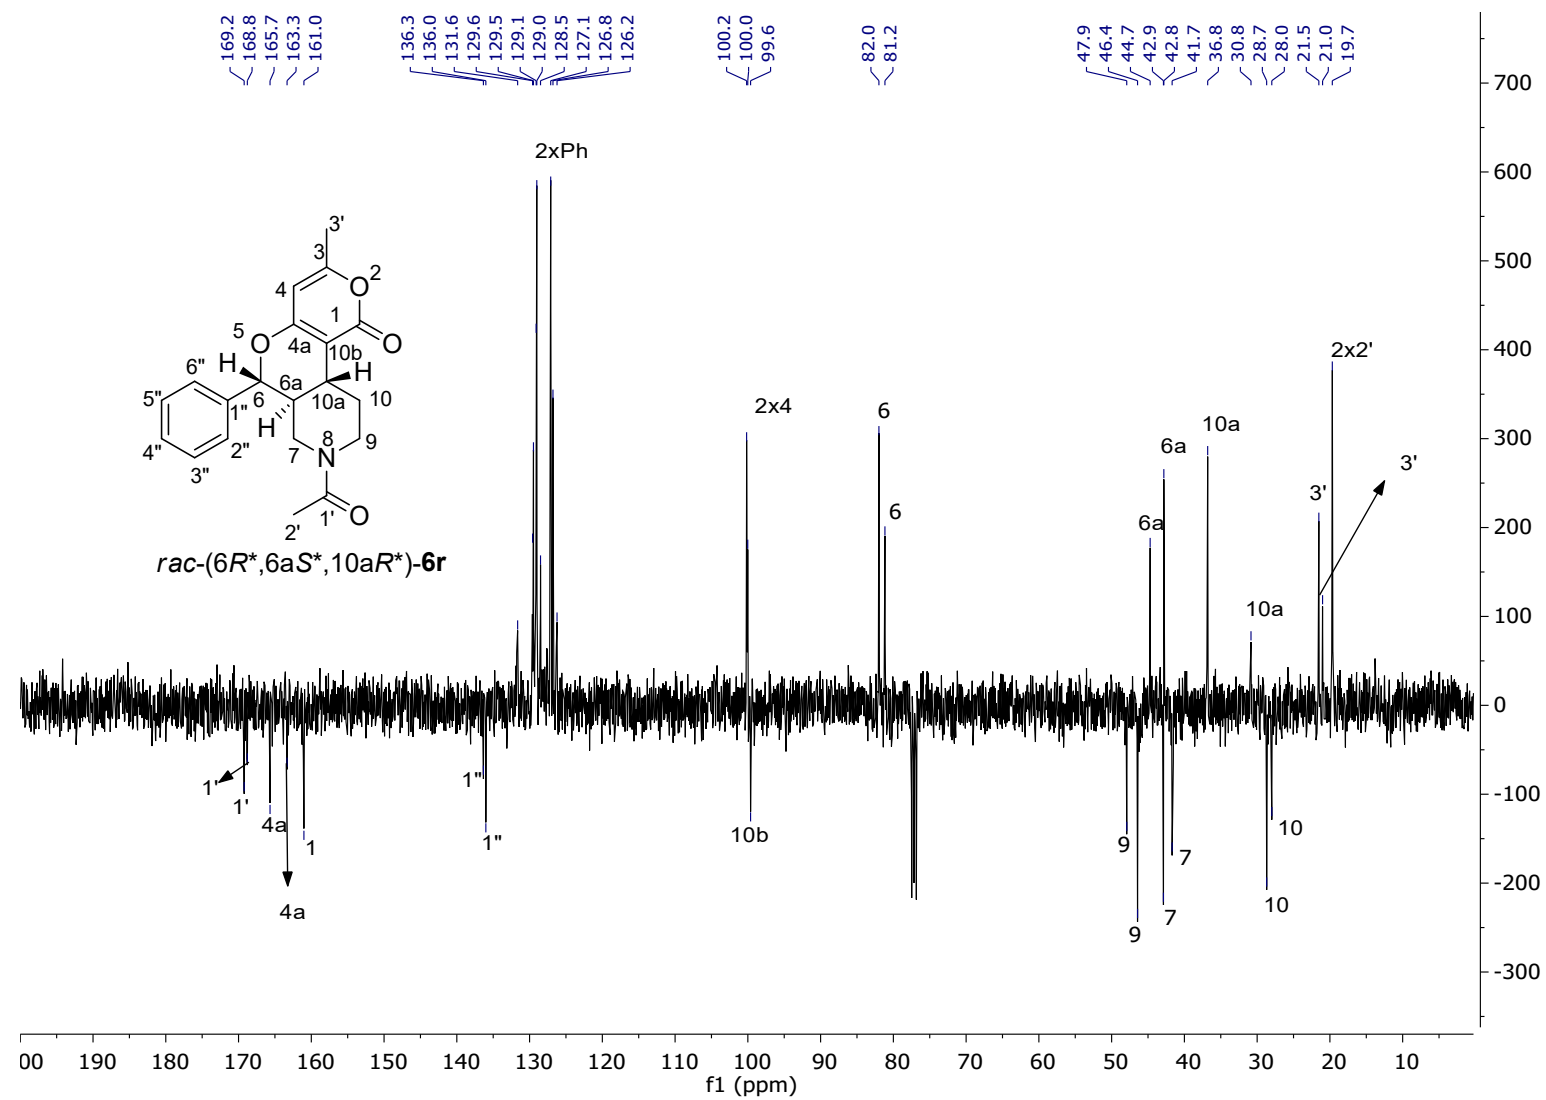

Figure S103. <sup>13</sup>C-NMR spectrum of the *rac*-(6*R*<sup>\*</sup>,6*aS*<sup>\*</sup>,10*aR*<sup>\*</sup>)-**6r** in CDCl<sub>3</sub> at 100 MHz.

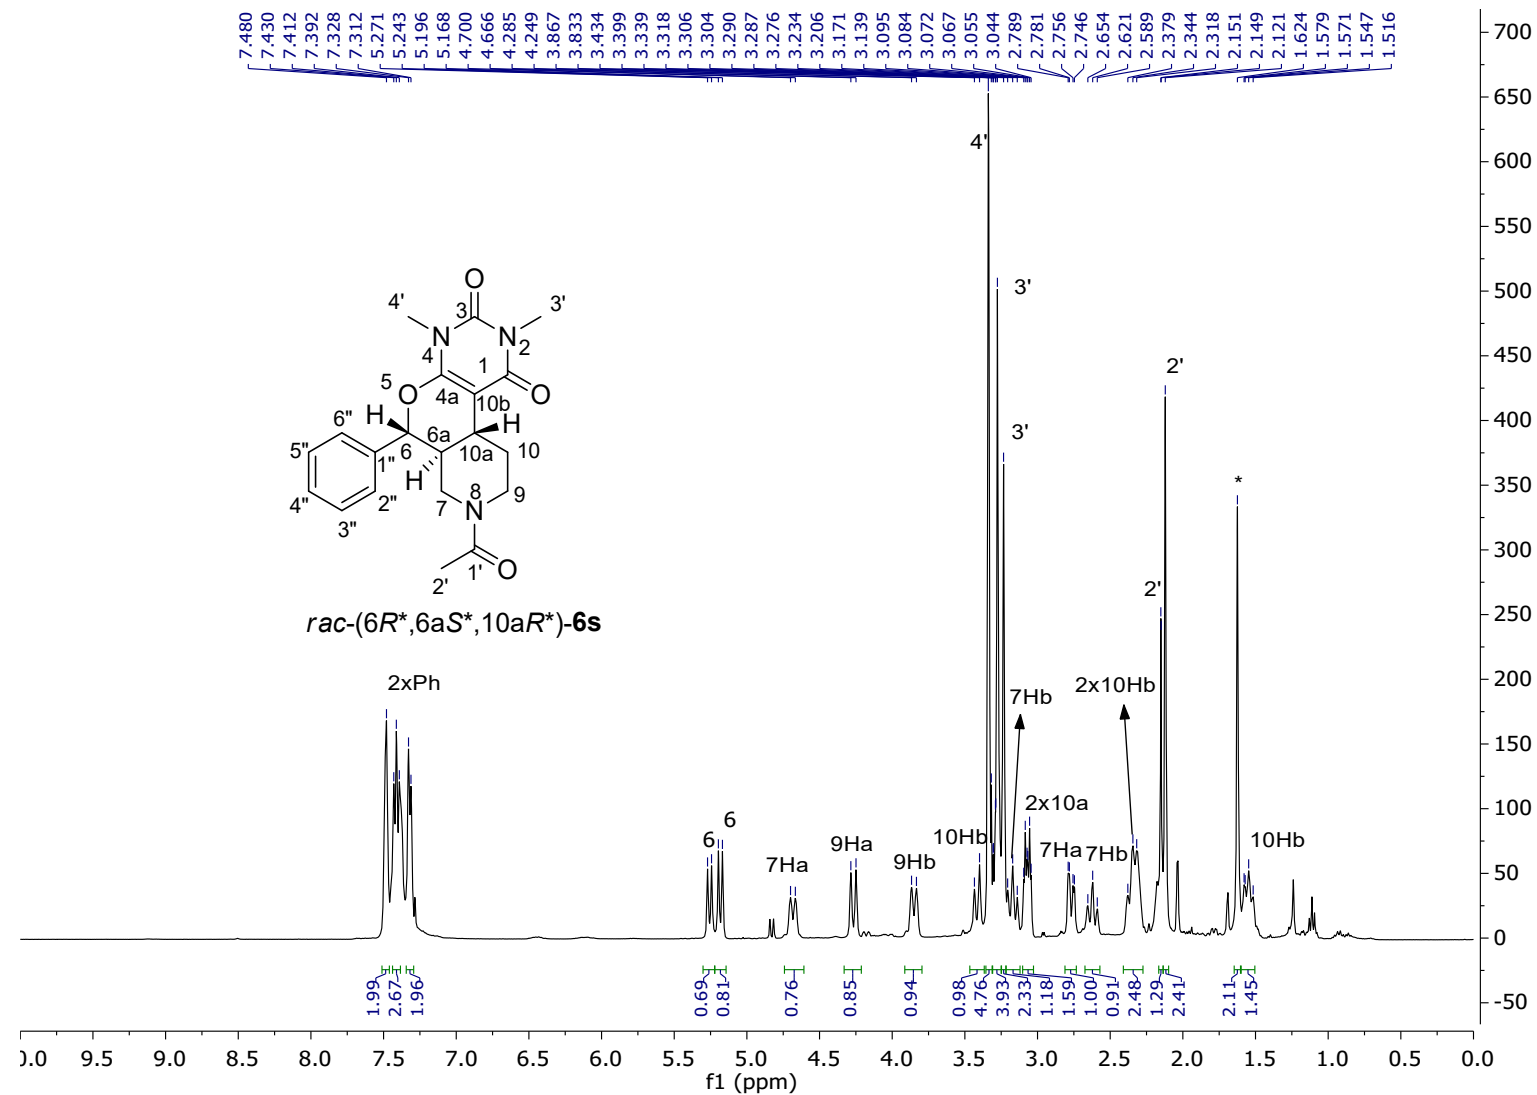

Figure S104. <sup>1</sup>H-NMR spectrum of the *rac*-(6*R*<sup>\*</sup>,6*aS*<sup>\*</sup>,10*aR*<sup>\*</sup>)-**6s** in CDCl<sub>3</sub> at 400 MHz.

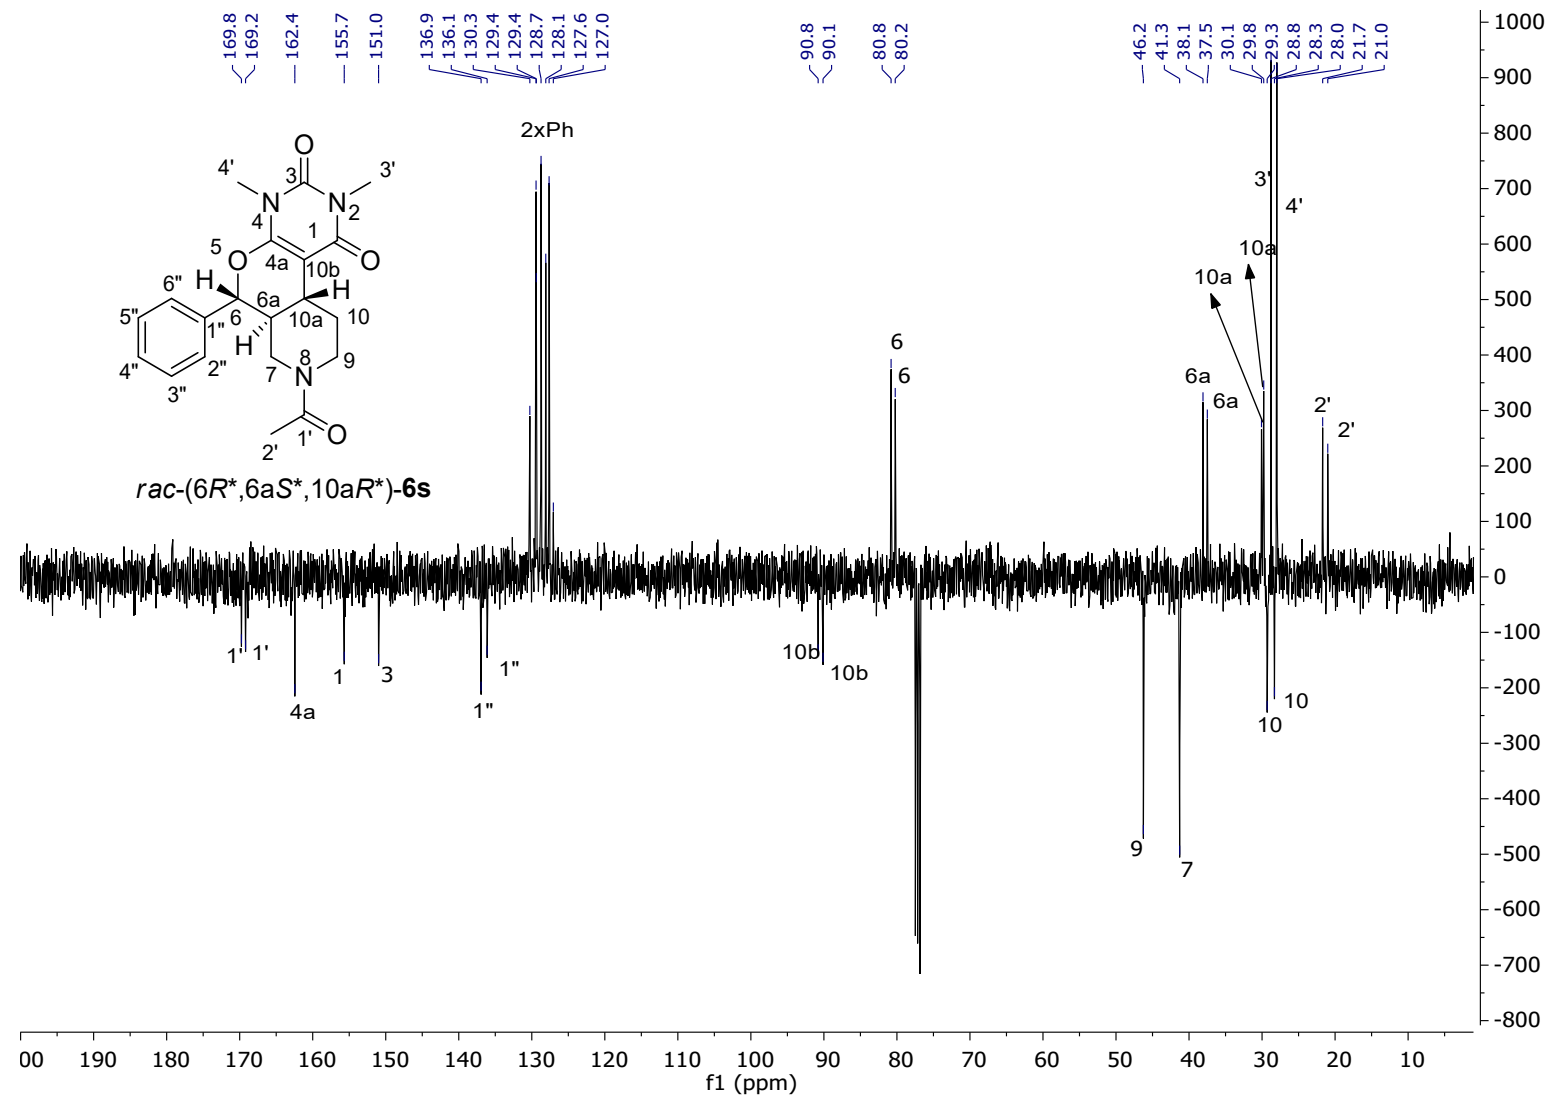

Figure S105. <sup>13</sup>C-NMR spectrum of the *rac*-(6*R*<sup>\*</sup>,6*aS*<sup>\*</sup>,10*aR*<sup>\*</sup>)-**6s** in CDCl<sub>3</sub> at 100 MHz.

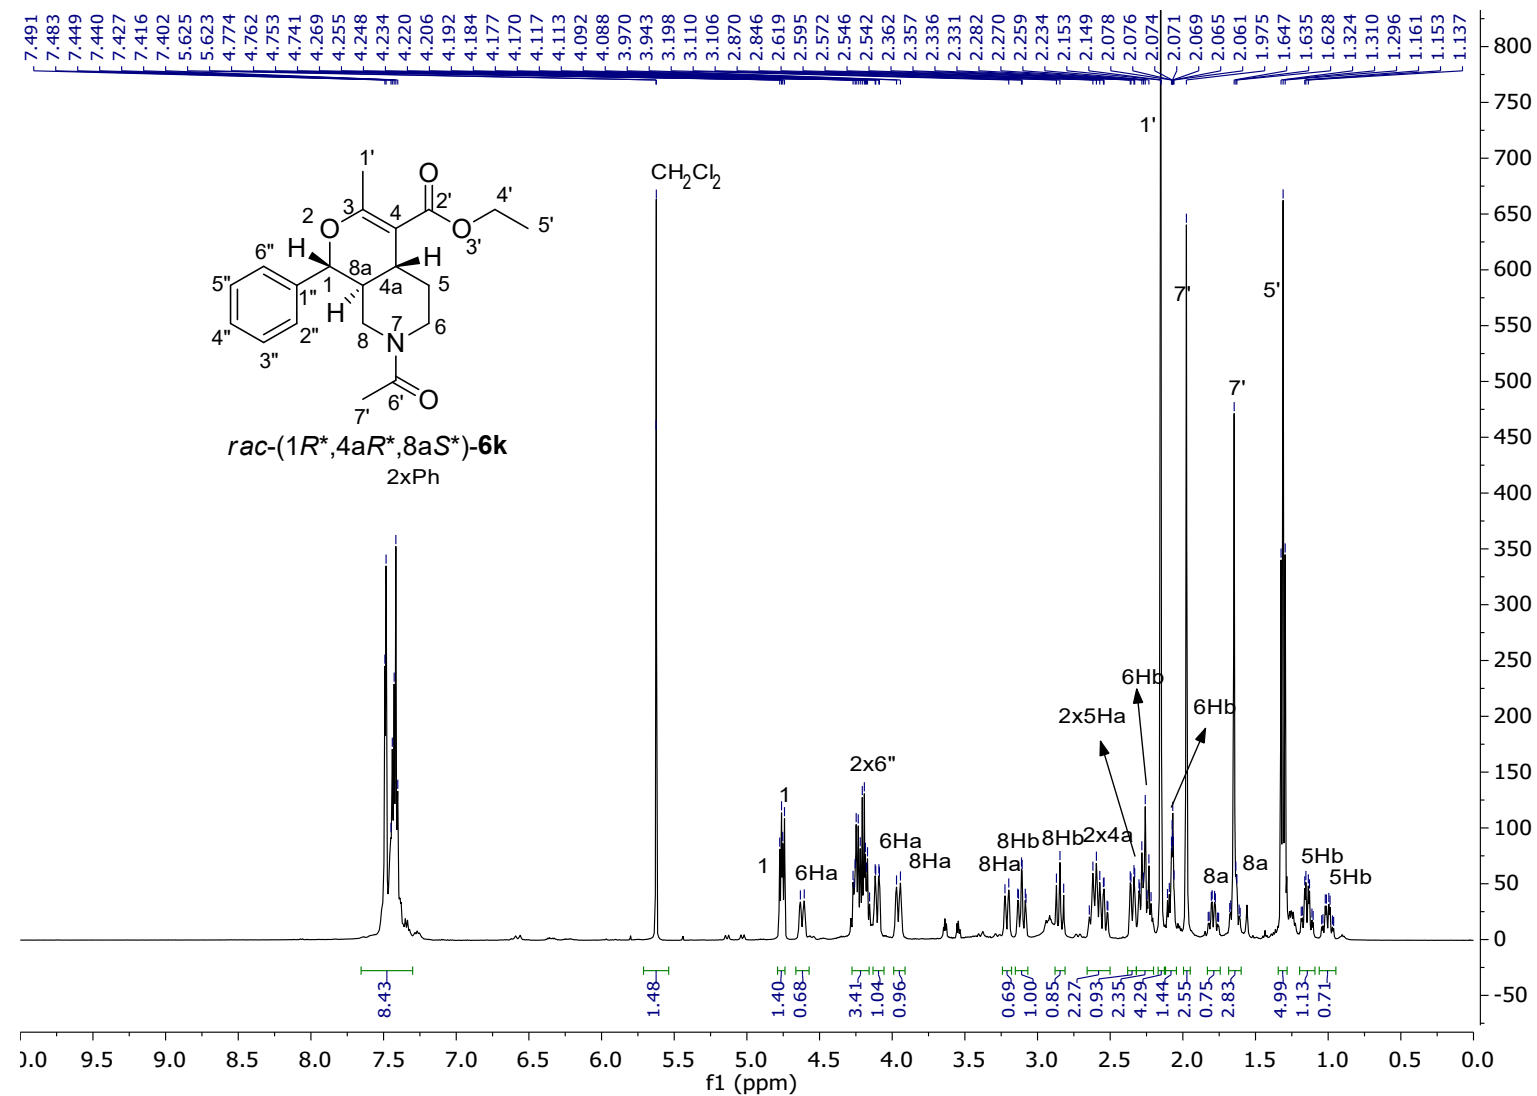

Figure S106. <sup>1</sup>H-NMR spectrum of the *rac*-(1*R*\*,4*aR*\*,8*aS*\*)-**6k** in acetone-*d*<sub>6</sub> at 500 MHz.

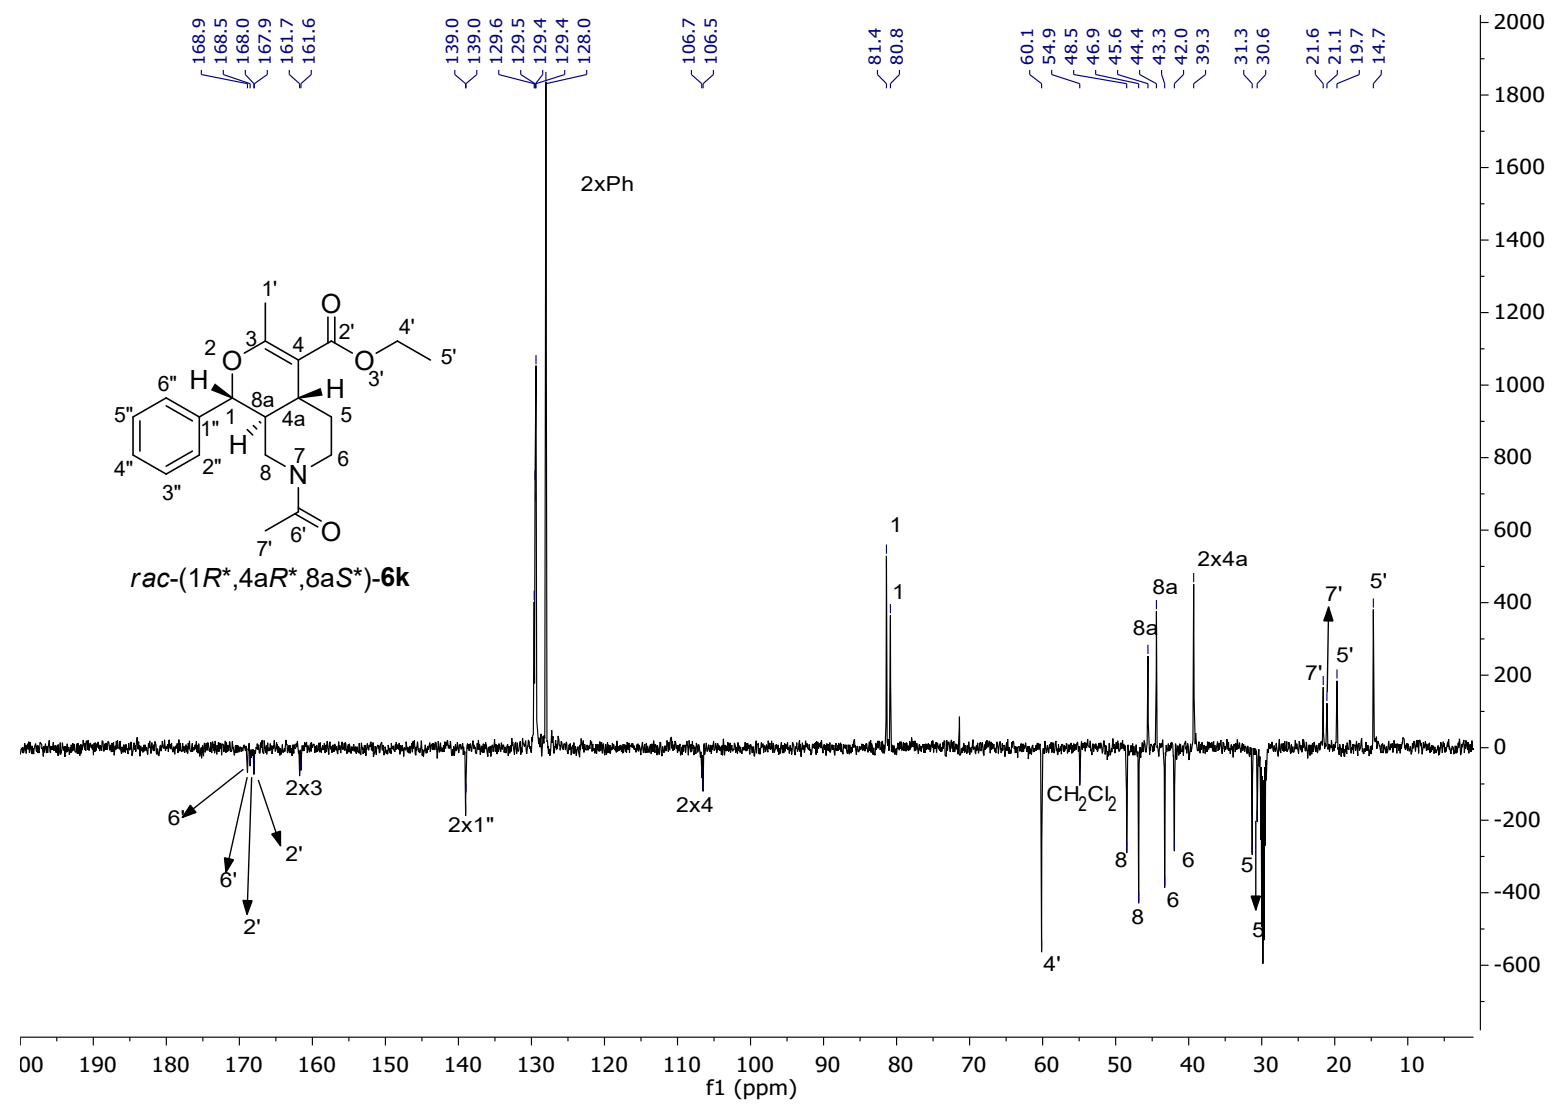

Figure S107. <sup>13</sup>C-NMR spectrum of the *rac*-(1*R*\*,4*aR*\*,8*aS*\*)-**6k** in acetone-d<sub>6</sub> at 125 MHz.

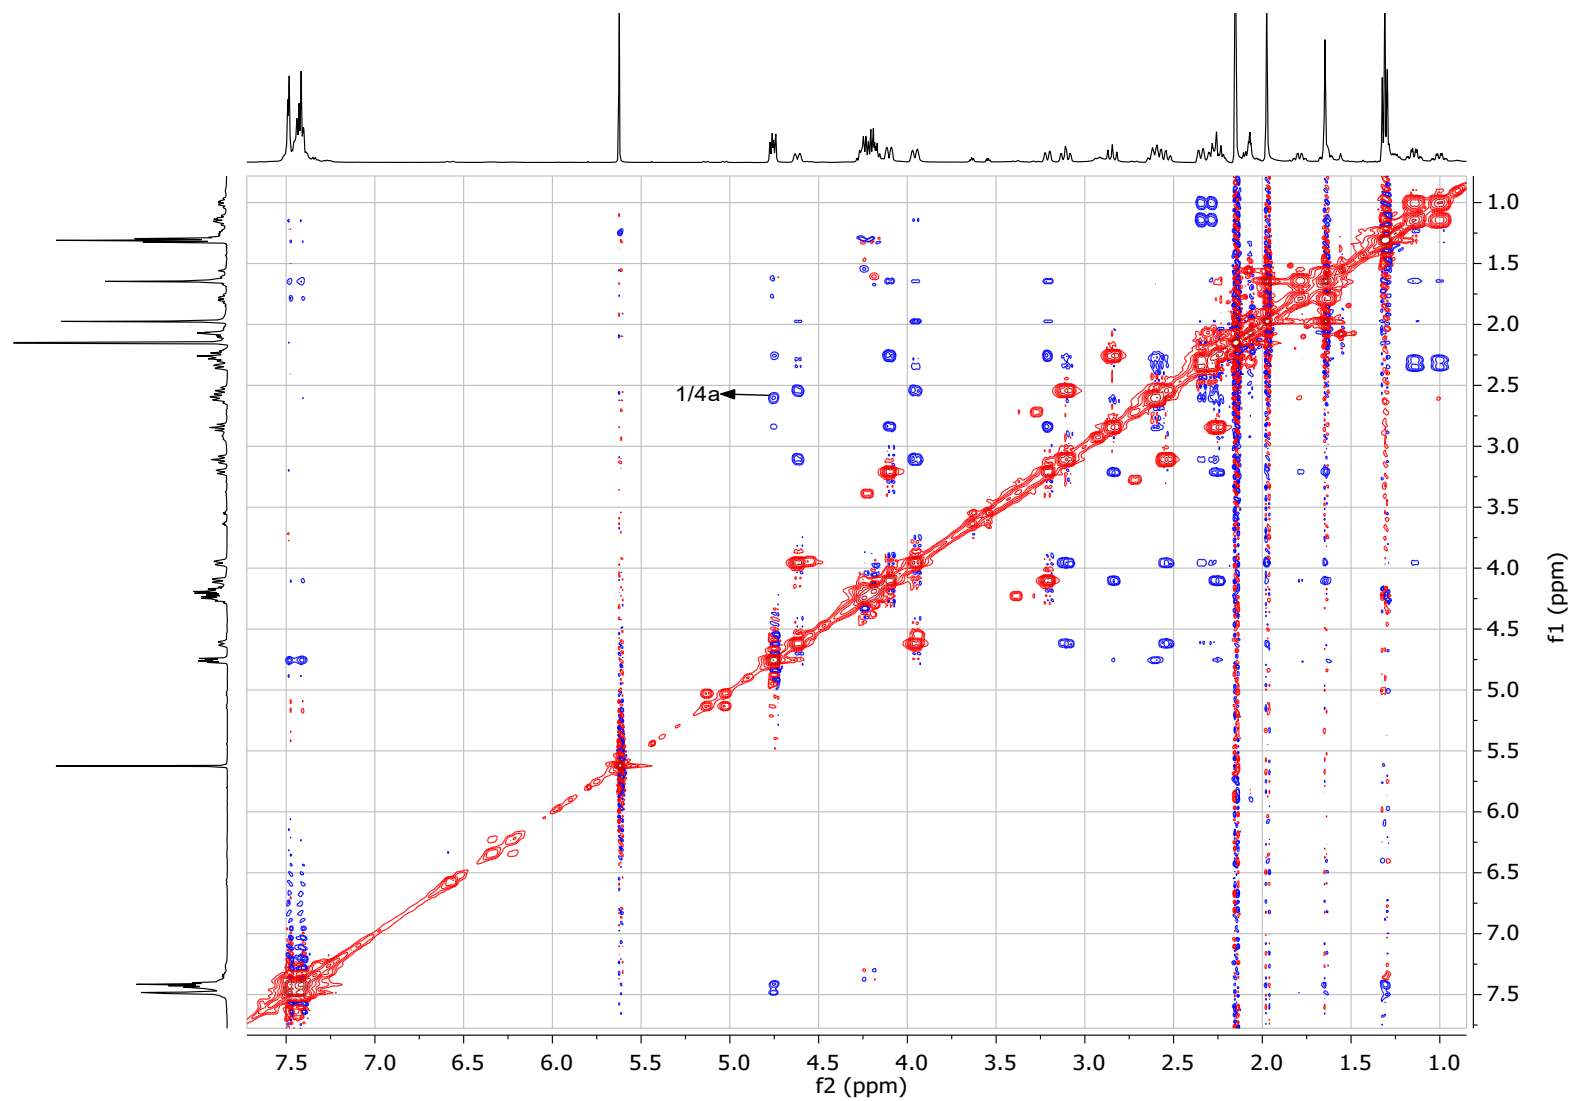

Figure S108. ROESY spectrum of the *rac*-(1*R*<sup>\*</sup>,4*aR*<sup>\*</sup>,8*aS*<sup>\*</sup>)-**6k** in acetone-*d*<sub>6</sub> at 500 MHz.

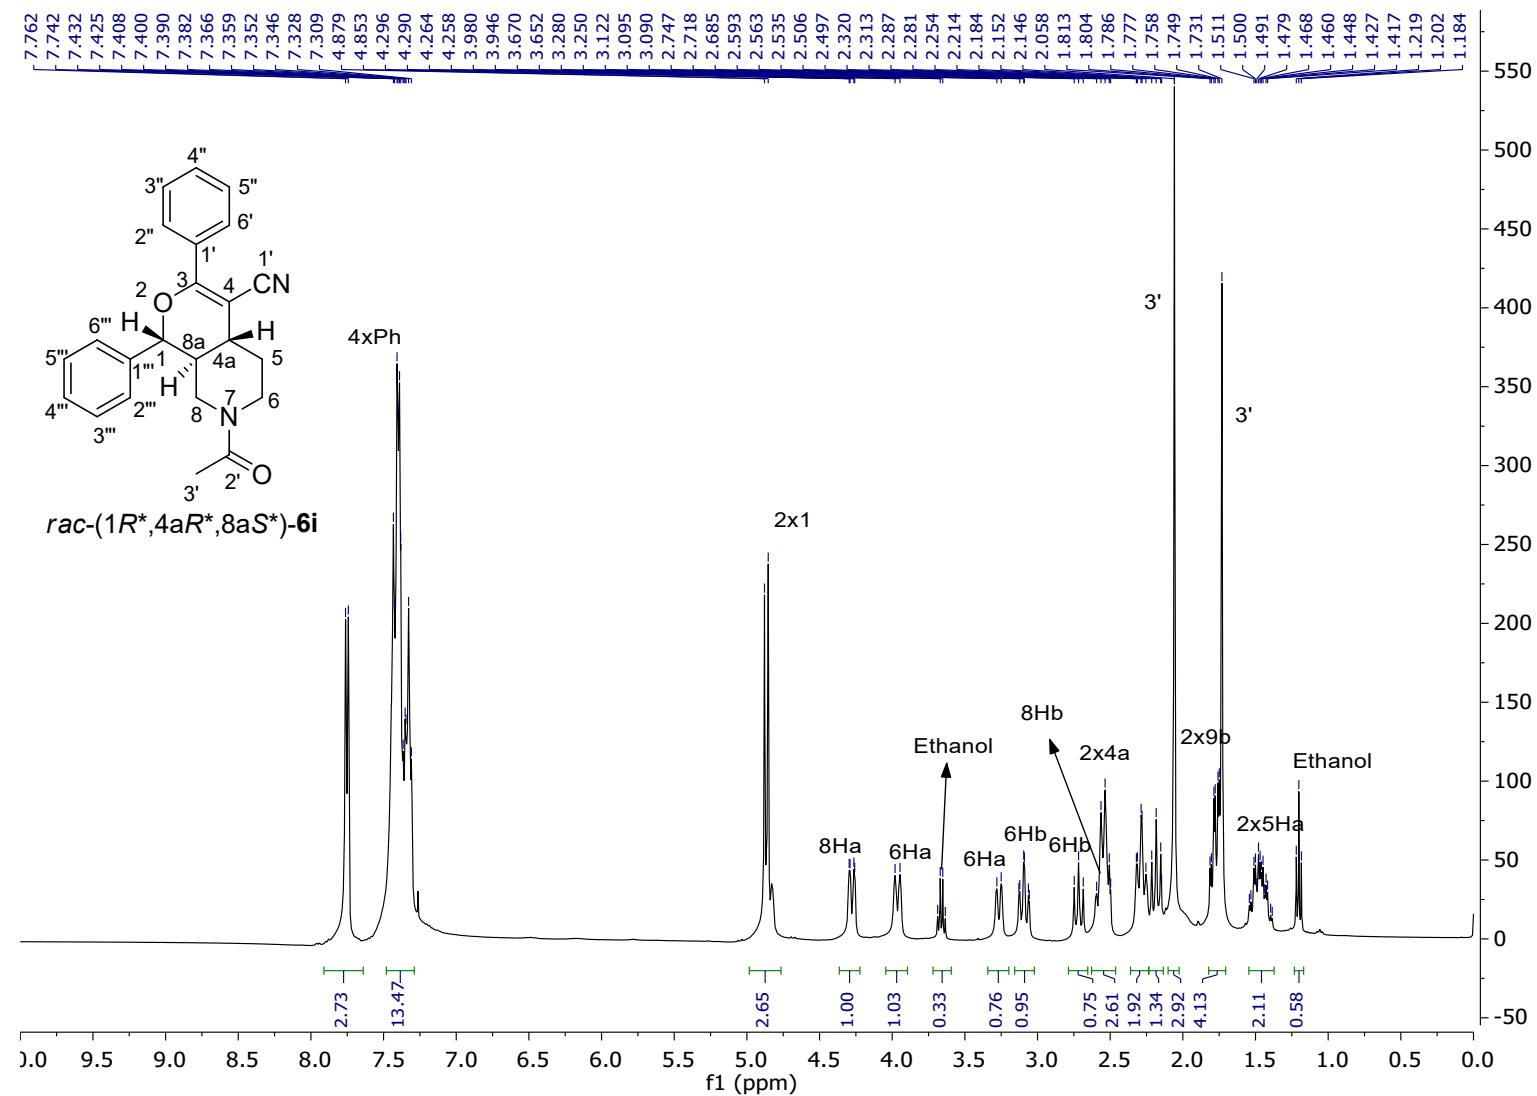

Figure S109. <sup>1</sup>H-NMR spectrum of the *rac*-(1*R*\*,4*aR*\*,8*aS*\*)-**6i** in CDCl<sub>3</sub> at 400 MHz.

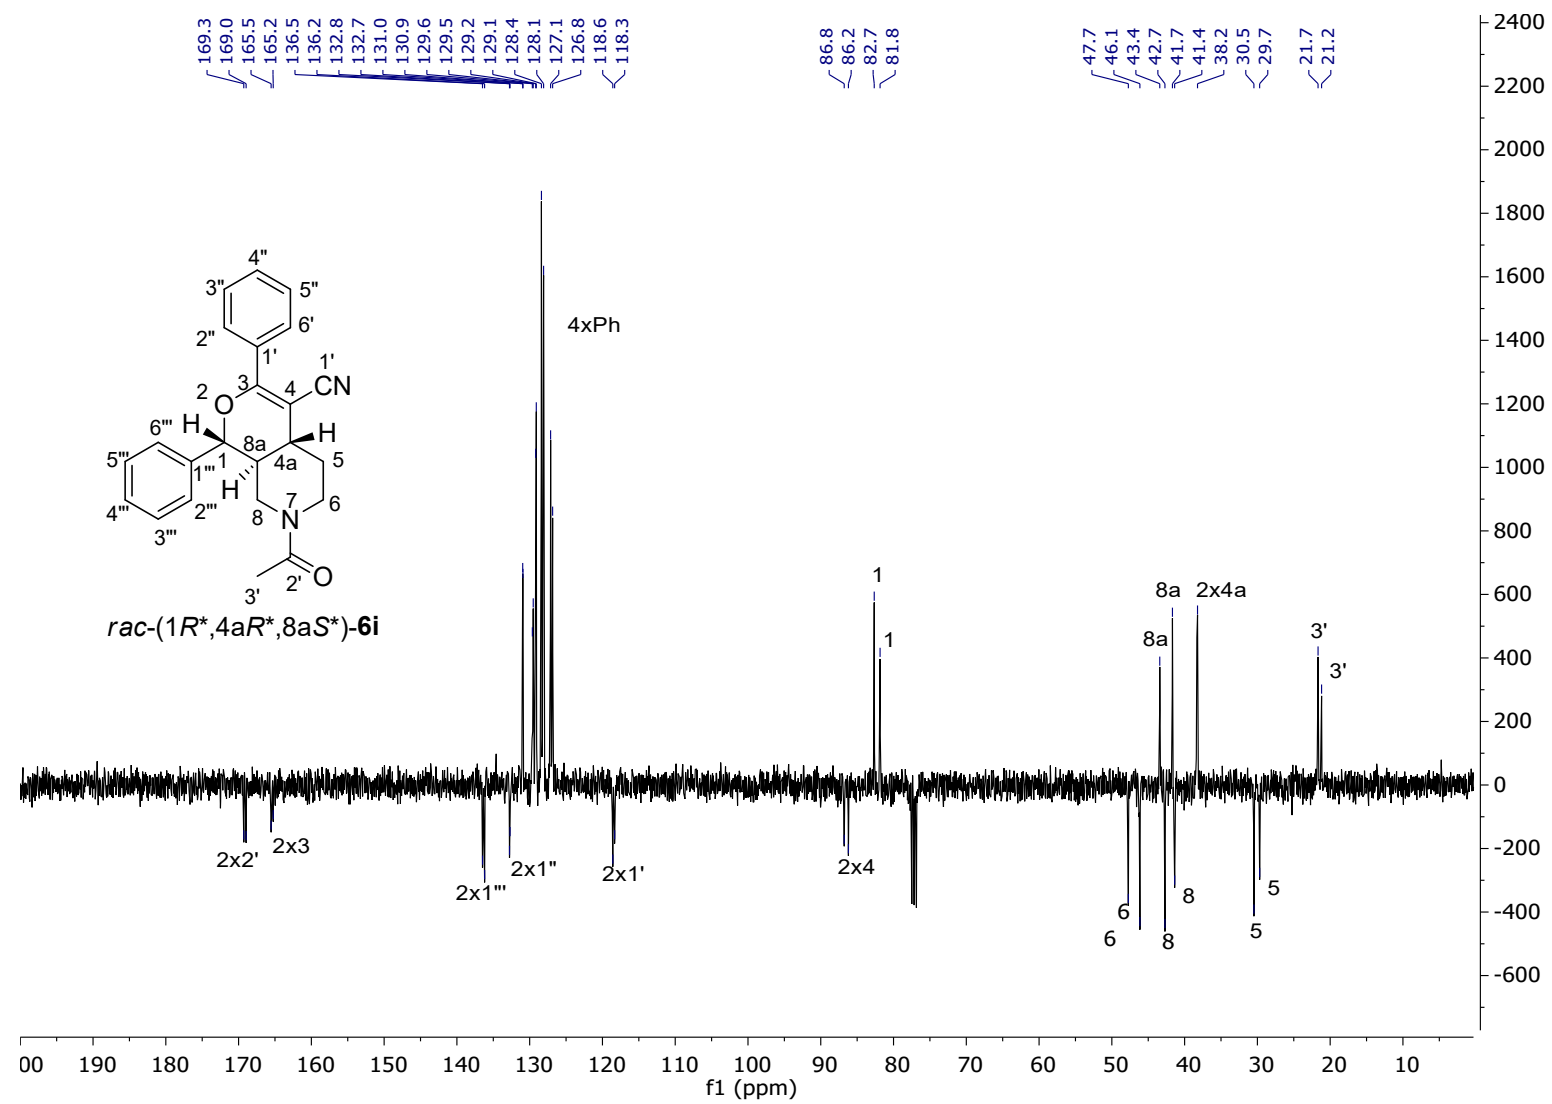

Figure S110. <sup>13</sup>C-NMR spectrum of the *rac*-(1*R*\*,4*aR*\*,8*aS*\*)-6*i* in CDCl<sub>3</sub> at 100 MHz.



## 5. X-Ray diffraction data

### Computing details

For both structures, data collection: Bruker Instrument Service vV6.2.6; cell refinement: *APEX3* v2017.3-0 (Bruker AXS); data reduction: *SAINTE* V8.38A (Bruker AXS Inc., 2017); program(s) used to solve structure: *SHELXT* 2014/5 (Sheldrick, 2014); program(s) used to refine structure: *SHELXL2019/1* (Sheldrick, 2019); molecular graphics: *shelXle* (C.B. Huebschle, rev 1503); software used to prepare material for publication: *WinGX*, *publCIF*.

Table S3. Experimental details of *rac*-(4*R*\*,4*aS*\*,10*bS*\*)-2*ai* (CCDC No. 2283893) and b) *rac*-(4*aS*\*,5*R*\*,9*bR*\*)-6*p* (CCDC No. 2401371).

|                                                   | <i>rac</i> -(4 <i>R</i> *,4 <i>aS</i> *,10 <i>bS</i> *)-2 <i>ai</i>                                                                                                                                                                                       | <i>rac</i> -(4 <i>aS</i> *,5 <i>R</i> *,9 <i>bR</i> *)-6 <i>p</i>                              |
|---------------------------------------------------|-----------------------------------------------------------------------------------------------------------------------------------------------------------------------------------------------------------------------------------------------------------|------------------------------------------------------------------------------------------------|
| Crystal data                                      |                                                                                                                                                                                                                                                           |                                                                                                |
| Chemical formula                                  | C <sub>27</sub> H <sub>23</sub> N <sub>3</sub> O <sub>4</sub> ·C <sub>3</sub> H <sub>6</sub> O                                                                                                                                                            | C <sub>20</sub> H <sub>23</sub> NO <sub>3</sub>                                                |
| <i>M</i> <sub>r</sub>                             | 511.56                                                                                                                                                                                                                                                    | 325.39                                                                                         |
| Crystal system, space group                       | Triclinic, <i>P</i> <sup>-</sup> 1                                                                                                                                                                                                                        | Triclinic, <i>P</i> <sup>-</sup> 1                                                             |
| Temperature (K)                                   | 299                                                                                                                                                                                                                                                       | 295                                                                                            |
| <i>a</i> , <i>b</i> , <i>c</i> (Å)                | 9.9366 (4), 10.1419 (4), 14.5001 (6)                                                                                                                                                                                                                      | 5.8551 (7), 10.1414 (12), 15.2595 (17)                                                         |
| α, β, γ (°)                                       | 96.998 (2), 94.577 (2), 111.265 (2)                                                                                                                                                                                                                       | 106.479 (5), 96.585 (5), 95.737 (5)                                                            |
| <i>V</i> (Å <sup>3</sup> )                        | 1339.43 (10)                                                                                                                                                                                                                                              | 854.75 (17)                                                                                    |
| <i>Z</i>                                          | 2                                                                                                                                                                                                                                                         | 2                                                                                              |
| Radiation type                                    | Mo <i>K</i> α                                                                                                                                                                                                                                             | Mo <i>K</i> α                                                                                  |
| μ (mm <sup>-1</sup> )                             | 0.09                                                                                                                                                                                                                                                      | 0.09                                                                                           |
| Crystal size (mm)                                 | 0.44 × 0.23 × 0.17                                                                                                                                                                                                                                        | 0.33 × 0.09 × 0.07                                                                             |
| Data collection                                   |                                                                                                                                                                                                                                                           |                                                                                                |
| Diffractometer                                    | Bruker D8 VENTURE                                                                                                                                                                                                                                         | Bruker D8 VENTURE                                                                              |
| Absorption correction                             | Multi-scan<br>Krause, L., Herbst-Irmer, R., Sheldrick, G. M., Stalke, D. (2015). "Comparison of silver and molybdenum microfocus X-ray sources for single-crystal structure determination" <i>J. Appl. Cryst.</i> 48, 3-10. doi:10.1107/S1600576714022985 | Multi-scan<br><i>SADABS2016/2</i> - Bruker AXS area detector scaling and absorption correction |
| <i>T</i> <sub>min</sub> , <i>T</i> <sub>max</sub> | 0.69, 0.98                                                                                                                                                                                                                                                | 0.97, 0.99                                                                                     |

|                                                                               |                               |                               |
|-------------------------------------------------------------------------------|-------------------------------|-------------------------------|
| No. of measured, independent and observed [ $I > 2\sigma(I)$ ] reflections    | 33353, 5081, 3804             | 21749, 3124, 2356             |
| $R_{\text{int}}$                                                              | 0.084                         | 0.059                         |
| $(\sin \theta/\lambda)_{\text{max}}$ ( $\text{\AA}^{-1}$ )                    | 0.610                         | 0.605                         |
| Refinement                                                                    |                               |                               |
| $R[F^2 > 2\sigma(F^2)]$ , $wR(F^2)$ , $S$                                     | 0.052, 0.157, 1.02            | 0.096, 0.320, 1.07            |
| No. of reflections                                                            | 5081                          | 3124                          |
| No. of parameters                                                             | 348                           | 219                           |
| H-atom treatment                                                              | H-atom parameters constrained | H-atom parameters constrained |
| $\Delta\rho_{\text{max}}$ , $\Delta\rho_{\text{min}}$ ( $\text{e \AA}^{-3}$ ) | 0.24, -0.26                   | 0.31, -0.26                   |

Computer programs: Bruker Instrument Service vV6.2.6, *APEX3* v2017.3-0 (Bruker AXS), *SAINT* V8.38A (Bruker AXS Inc., 2017), *SHELXT* 2014/5 (Sheldrick, 2014), *SHELXL2019/1* (Sheldrick, 2019), *shelXle* (C.B. Huebschle, rev 1503), *WinGX*, *publCIF*.

Document origin: *publCIF* [Westrip, S. P. (2010). *J. Apply. Cryst.*, **43**, 920-925].

Table S4. Geometric parameters ( $\text{\AA}$ ,  $^\circ$ ) for *rac*-(4*R*\*,4*aS*\*,10*bS*\*)-**2ai**.

|          |           |          |           |
|----------|-----------|----------|-----------|
| C1—C2    | 1.354 (2) | C15—C16  | 1.367 (4) |
| C1—C11   | 1.426 (2) | C15—H15  | 0.9300    |
| C1—C10B  | 1.507 (2) | C16—C17  | 1.383 (3) |
| C2—O3    | 1.348 (2) | C16—H16  | 0.9300    |
| C2—C12   | 1.479 (2) | C17—H17  | 0.9300    |
| C4—O3    | 1.455 (2) | C18—C23  | 1.387 (3) |
| C4—C18   | 1.509 (2) | C18—C19  | 1.392 (3) |
| C4—C4A   | 1.517 (2) | C19—O24  | 1.367 (2) |
| C4—H4    | 0.9800    | C19—C20  | 1.386 (3) |
| C5—N6    | 1.456 (3) | C20—C21  | 1.385 (3) |
| C5—C4A   | 1.517 (2) | C20—H20  | 0.9300    |
| C5—H5A   | 0.9700    | C21—C22  | 1.366 (4) |
| C5—H5B   | 0.9700    | C21—H21  | 0.9300    |
| C4A—C10B | 1.532 (2) | C22—C23  | 1.382 (3) |
| C4A—H4A  | 0.9800    | C22—H22  | 0.9300    |
| C7—C8    | 1.367 (3) | C23—H23  | 0.9300    |
| C7—C6A   | 1.404 (3) | C25—O24  | 1.418 (3) |
| C7—H7    | 0.9300    | C25—H25A | 0.9600    |
| C6A—N6   | 1.361 (3) | C25—H25B | 0.9600    |
| C6A—C10A | 1.429 (3) | C25—H25C | 0.9600    |
| C8—C9    | 1.383 (3) | C26—N6   | 1.460 (2) |

|              |             |             |             |
|--------------|-------------|-------------|-------------|
| C8—H8        | 0.9300      | C26—H26A    | 0.9600      |
| C9—C10       | 1.397 (3)   | C26—H26B    | 0.9600      |
| C9—N27       | 1.432 (3)   | C26—H26C    | 0.9600      |
| C10—C10A     | 1.368 (3)   | C51—C52     | 1.468 (6)   |
| C10—H10      | 0.9300      | C51—H51A    | 0.9600      |
| C11—N29      | 1.144 (2)   | C51—H51B    | 0.9600      |
| C10A—C10B    | 1.513 (3)   | C51—H51C    | 0.9600      |
| C10B—H10B    | 0.9800      | C52—O51     | 1.194 (4)   |
| C12—C17      | 1.381 (3)   | C52—C53     | 1.440 (5)   |
| C12—C13      | 1.384 (3)   | C53—H53A    | 0.9600      |
| C13—C14      | 1.387 (3)   | C53—H53B    | 0.9600      |
| C13—H13      | 0.9300      | C53—H53C    | 0.9600      |
| C14—C15      | 1.376 (4)   | N27—O28     | 1.226 (3)   |
| C14—H14      | 0.9300      | N27—O29     | 1.236 (2)   |
|              |             |             |             |
| C2—C1—C11    | 119.41 (15) | C14—C15—H15 | 120.1000    |
| C2—C1—C10B   | 122.34 (15) | C15—C16—C17 | 120.1 (2)   |
| C11—C1—C10B  | 117.65 (15) | C15—C16—H16 | 120.0000    |
| O3—C2—C1     | 122.92 (15) | C17—C16—H16 | 120.0000    |
| O3—C2—C12    | 112.08 (14) | C12—C17—C16 | 120.8 (2)   |
| C1—C2—C12    | 125.00 (16) | C12—C17—H17 | 119.6000    |
| O3—C4—C18    | 106.42 (14) | C16—C17—H17 | 119.6000    |
| O3—C4—C4A    | 108.71 (14) | C23—C18—C19 | 118.77 (17) |
| C18—C4—C4A   | 112.48 (14) | C23—C18—C4  | 121.05 (17) |
| O3—C4—H4     | 109.7000    | C19—C18—C4  | 120.12 (17) |
| C18—C4—H4    | 109.7000    | O24—C19—C20 | 124.51 (19) |
| C4A—C4—H4    | 109.7000    | O24—C19—C18 | 115.20 (16) |
| N6—C5—C4A    | 111.05 (17) | C20—C19—C18 | 120.3 (2)   |
| N6—C5—H5A    | 109.4000    | C21—C20—C19 | 119.6 (2)   |
| C4A—C5—H5A   | 109.4000    | C21—C20—H20 | 120.2000    |
| N6—C5—H5B    | 109.4000    | C19—C20—H20 | 120.2000    |
| C4A—C5—H5B   | 109.4000    | C22—C21—C20 | 120.6 (2)   |
| H5A—C5—H5B   | 108.0000    | C22—C21—H21 | 119.7000    |
| C5—C4A—C4    | 113.62 (16) | C20—C21—H21 | 119.7000    |
| C5—C4A—C10B  | 106.85 (14) | C21—C22—C23 | 119.8 (2)   |
| C4—C4A—C10B  | 111.16 (14) | C21—C22—H22 | 120.1000    |
| C5—C4A—H4A   | 108.4000    | C23—C22—H22 | 120.1000    |
| C4—C4A—H4A   | 108.4000    | C22—C23—C18 | 120.9 (2)   |
| C10B—C4A—H4A | 108.4000    | C22—C23—H23 | 119.6000    |
| C8—C7—C6A    | 121.5 (2)   | C18—C23—H23 | 119.6000    |

|                |              |                     |             |
|----------------|--------------|---------------------|-------------|
| C8—C7—H7       | 119.3000     | O24—C25—H25A        | 109.5000    |
| C6A—C7—H7      | 119.3000     | O24—C25—H25B        | 109.5000    |
| N6—C6A—C7      | 121.62 (18)  | H25A—C25—H25B       | 109.5000    |
| N6—C6A—C10A    | 120.19 (18)  | O24—C25—H25C        | 109.5000    |
| C7—C6A—C10A    | 118.2 (2)    | H25A—C25—H25C       | 109.5000    |
| C7—C8—C9       | 119.6 (2)    | H25B—C25—H25C       | 109.5000    |
| C7—C8—H8       | 120.2000     | N6—C26—H26A         | 109.5000    |
| C9—C8—H8       | 120.2000     | N6—C26—H26B         | 109.5000    |
| C8—C9—C10      | 120.5 (2)    | H26A—C26—H26B       | 109.5000    |
| C8—C9—N27      | 119.74 (19)  | N6—C26—H26C         | 109.5000    |
| C10—C9—N27     | 119.76 (19)  | H26A—C26—H26C       | 109.5000    |
| C10A—C10—C9    | 120.63 (19)  | H26B—C26—H26C       | 109.5000    |
| C10A—C10—H10   | 119.7000     | C52—C51—H51A        | 109.5000    |
| C9—C10—H10     | 119.7000     | C52—C51—H51B        | 109.5000    |
| N29—C11—C1     | 175.4 (2)    | H51A—C51—H51B       | 109.5000    |
| C10—C10A—C6A   | 119.45 (18)  | C52—C51—H51C        | 109.5000    |
| C10—C10A—C10B  | 125.43 (16)  | H51A—C51—H51C       | 109.5000    |
| C6A—C10A—C10B  | 115.11 (17)  | H51B—C51—H51C       | 109.5000    |
| C1—C10B—C10A   | 117.02 (16)  | O51—C52—C53         | 122.4 (5)   |
| C1—C10B—C4A    | 110.46 (14)  | O51—C52—C51         | 118.8 (4)   |
| C10A—C10B—C4A  | 105.46 (14)  | C53—C52—C51         | 118.8 (4)   |
| C1—C10B—H10B   | 107.9000     | C52—C53—H53A        | 109.5000    |
| C10A—C10B—H10B | 107.9000     | C52—C53—H53B        | 109.5000    |
| C4A—C10B—H10B  | 107.9000     | H53A—C53—H53B       | 109.5000    |
| C17—C12—C13    | 118.87 (17)  | C52—C53—H53C        | 109.5000    |
| C17—C12—C2     | 120.69 (17)  | H53A—C53—H53C       | 109.5000    |
| C13—C12—C2     | 120.43 (17)  | H53B—C53—H53C       | 109.5000    |
| C12—C13—C14    | 120.1 (2)    | C6A—N6—C5           | 122.80 (15) |
| C12—C13—H13    | 119.9000     | C6A—N6—C26          | 120.72 (19) |
| C14—C13—H13    | 119.9000     | C5—N6—C26           | 115.13 (18) |
| C15—C14—C13    | 120.3 (2)    | O28—N27—O29         | 121.6 (2)   |
| C15—C14—H14    | 119.9000     | O28—N27—C9          | 119.22 (19) |
| C13—C14—H14    | 119.9000     | O29—N27—C9          | 119.2 (2)   |
| C16—C15—C14    | 119.9 (2)    | C2—O3—C4            | 116.88 (13) |
| C16—C15—H15    | 120.1000     | C19—O24—C25         | 118.54 (16) |
|                |              |                     |             |
| C11—C1—C2—O3   | -165.15 (17) | C17—C12—C13—<br>C14 | -1.0 (3)    |
| C10B—C1—C2—O3  | 5.7 (3)      | C2—C12—C13—C14      | 179.77 (19) |
| C11—C1—C2—C12  | 15.2 (3)     | C12—C13—C14—<br>C15 | 0.1 (3)     |

|                      |              |                     |              |
|----------------------|--------------|---------------------|--------------|
| C10B—C1—C2—C12       | -173.94 (17) | C13—C14—C15—<br>C16 | 0.8 (4)      |
| N6—C5—C4A—C4         | -173.46 (15) | C14—C15—C16—<br>C17 | -0.8 (4)     |
| N6—C5—C4A—<br>C10B   | -50.5 (2)    | C13—C12—C17—<br>C16 | 1.0 (3)      |
| O3—C4—C4A—C5         | -179.46 (14) | C2—C12—C17—C16      | -179.78 (19) |
| C18—C4—C4A—C5        | -61.9 (2)    | C15—C16—C17—<br>C12 | -0.1 (3)     |
| O3—C4—C4A—<br>C10B   | 59.98 (19)   | O3—C4—C18—C23       | 36.8 (2)     |
| C18—C4—C4A—<br>C10B  | 177.57 (15)  | C4A—C4—C18—C23      | -82.1 (2)    |
| C8—C7—C6A—N6         | 177.0 (2)    | O3—C4—C18—C19       | -146.08 (17) |
| C8—C7—C6A—<br>C10A   | -4.4 (3)     | C4A—C4—C18—C19      | 95.0 (2)     |
| C6A—C7—C8—C9         | 0.6 (3)      | C23—C18—C19—<br>O24 | 178.16 (17)  |
| C7—C8—C9—C10         | 2.2 (3)      | C4—C18—C19—O24      | 1.0 (3)      |
| C7—C8—C9—N27         | -179.01 (19) | C23—C18—C19—<br>C20 | -0.8 (3)     |
| C8—C9—C10—C10A       | -1.2 (3)     | C4—C18—C19—C20      | -177.95 (18) |
| N27—C9—C10—<br>C10A  | -179.93 (17) | O24—C19—C20—<br>C21 | -179.2 (2)   |
| C9—C10—C10A—<br>C6A  | -2.7 (3)     | C18—C19—C20—<br>C21 | -0.3 (3)     |
| C9—C10—C10A—<br>C10B | 178.39 (17)  | C19—C20—C21—<br>C22 | 1.1 (4)      |
| N6—C6A—C10A—<br>C10  | -176.00 (17) | C20—C21—C22—<br>C23 | -0.7 (4)     |
| C7—C6A—C10A—<br>C10  | 5.3 (3)      | C21—C22—C23—<br>C18 | -0.5 (4)     |
| N6—C6A—C10A—<br>C10B | 3.0 (3)      | C19—C18—C23—<br>C22 | 1.2 (3)      |
| C7—C6A—C10A—<br>C10B | -175.61 (17) | C4—C18—C23—C22      | 178.33 (19)  |
| C2—C1—C10B—<br>C10A  | 127.21 (19)  | C7—C6A—N6—C5        | -162.51 (19) |
| C11—C1—C10B—<br>C10A | -61.8 (2)    | C10A—C6A—N6—<br>C5  | 18.9 (3)     |
| C2—C1—C10B—<br>C4A   | 6.6 (3)      | C7—C6A—N6—C26       | 3.6 (3)      |
| C11—C1—C10B—<br>C4A  | 177.59 (17)  | C10A—C6A—N6—<br>C26 | -175.01 (18) |
| C10—C10A—C10B—<br>C1 | 9.6 (3)      | C4A—C5—N6—C6A       | 6.7 (3)      |
| C6A—C10A—            | -169.36 (16) | C4A—C5—N6—C26       | -160.11 (18) |

|                   |              |                 |              |
|-------------------|--------------|-----------------|--------------|
| C10B—C1           |              |                 |              |
| C10—C10A—C10B—C4A | 132.86 (18)  | C8—C9—N27—O28   | 177.0 (2)    |
| C6A—C10A—C10B—C4A | -46.1 (2)    | C10—C9—N27—O28  | -4.2 (3)     |
| C5—C4A—C10B—C1    | -163.22 (16) | C8—C9—N27—O29   | -3.0 (3)     |
| C4—C4A—C10B—C1    | -38.7 (2)    | C10—C9—N27—O29  | 175.74 (19)  |
| C5—C4A—C10B—C10A  | 69.46 (19)   | C1—C2—O3—C4     | 17.0 (3)     |
| C4—C4A—C10B—C10A  | -166.06 (15) | C12—C2—O3—C4    | -163.31 (15) |
| O3—C2—C12—C17     | -133.82 (18) | C18—C4—O3—C2    | -170.65 (15) |
| C1—C2—C12—C17     | 45.9 (3)     | C4A—C4—O3—C2    | -49.27 (19)  |
| O3—C2—C12—C13     | 45.4 (2)     | C20—C19—O24—C25 | 4.7 (3)      |
| C1—C2—C12—C13     | -134.9 (2)   | C18—C19—O24—C25 | -174.22 (18) |

Table S5. Geometric parameters (Å, °) for rac-(4a*S*\*,5*R*\*,9b*R*\*)-6p.

|          |           |          |           |
|----------|-----------|----------|-----------|
| C1—C2    | 1.512 (7) | C8—H8AB  | 0.9700    |
| C1—C9B   | 1.525 (7) | C9—C10   | 1.504 (8) |
| C1—H1A   | 0.9700    | C9—H9A   | 0.9700    |
| C1—H1AB  | 0.9700    | C9—H9AB  | 0.9700    |
| C2—N3    | 1.465 (6) | C9B—C10A | 1.513 (7) |
| C2—H2A   | 0.9700    | C9B—H9B  | 0.9800    |
| C2—H2AB  | 0.9700    | C10—O11  | 1.224 (7) |
| C4—N3    | 1.455 (6) | C10—C10A | 1.462 (7) |
| C4—C4A   | 1.528 (7) | C12—O14  | 1.216 (6) |
| C4—H4A   | 0.9700    | C12—N3   | 1.338 (7) |
| C4—H4AB  | 0.9700    | C12—C13  | 1.513 (8) |
| C5—O6    | 1.444 (6) | C13—H13A | 0.9600    |
| C5—C15   | 1.499 (7) | C13—H13B | 0.9600    |
| C5—C4A   | 1.515 (7) | C13—H13C | 0.9600    |
| C5—H5    | 0.9800    | C15—C20  | 1.380 (7) |
| C4A—C9B  | 1.537 (6) | C15—C16  | 1.389 (7) |
| C4A—H4AA | 0.9800    | C16—C17  | 1.393 (7) |
| C6—C10A  | 1.338 (7) | C16—H16  | 0.9300    |
| C6—O6    | 1.354 (6) | C17—C18  | 1.371 (8) |
| C6—C7    | 1.500 (7) | C17—H17  | 0.9300    |

|              |            |               |           |
|--------------|------------|---------------|-----------|
| C7—C8        | 1.495 (9)  | C18—C19       | 1.351 (9) |
| C7—H7A       | 0.9700     | C18—H18       | 0.9300    |
| C7—H7AB      | 0.9700     | C19—C20       | 1.376 (8) |
| C8—C9        | 1.501 (10) | C19—H19       | 0.9300    |
| C8—H8A       | 0.9700     | C20—H20       | 0.9300    |
|              |            |               |           |
| C2—C1—C9B    | 110.2 (4)  | C10—C9—H9A    | 108.9000  |
| C2—C1—H1A    | 109.6000   | C8—C9—H9AB    | 108.9000  |
| C9B—C1—H1A   | 109.6000   | C10—C9—H9AB   | 108.9000  |
| C2—C1—H1AB   | 109.6000   | H9A—C9—H9AB   | 107.7000  |
| C9B—C1—H1AB  | 109.6000   | C10A—C9B—C1   | 115.5 (4) |
| H1A—C1—H1AB  | 108.1000   | C10A—C9B—C4A  | 109.3 (4) |
| N3—C2—C1     | 111.6 (4)  | C1—C9B—C4A    | 107.4 (4) |
| N3—C2—H2A    | 109.3000   | C10A—C9B—H9B  | 108.1000  |
| C1—C2—H2A    | 109.3000   | C1—C9B—H9B    | 108.1000  |
| N3—C2—H2AB   | 109.3000   | C4A—C9B—H9B   | 108.1000  |
| C1—C2—H2AB   | 109.3000   | O11—C10—C10A  | 121.6 (5) |
| H2A—C2—H2AB  | 108.0000   | O11—C10—C9    | 120.7 (5) |
| N3—C4—C4A    | 110.3 (4)  | C10A—C10—C9   | 117.6 (5) |
| N3—C4—H4A    | 109.6000   | C6—C10A—C10   | 118.3 (5) |
| C4A—C4—H4A   | 109.6000   | C6—C10A—C9B   | 120.6 (4) |
| N3—C4—H4AB   | 109.6000   | C10—C10A—C9B  | 120.6 (4) |
| C4A—C4—H4AB  | 109.6000   | O14—C12—N3    | 122.7 (5) |
| H4A—C4—H4AB  | 108.1000   | O14—C12—C13   | 119.3 (5) |
| O6—C5—C15    | 107.1 (4)  | N3—C12—C13    | 118.0 (5) |
| O6—C5—C4A    | 107.8 (4)  | C12—C13—H13A  | 109.5000  |
| C15—C5—C4A   | 115.7 (4)  | C12—C13—H13B  | 109.5000  |
| O6—C5—H5     | 108.7000   | H13A—C13—H13B | 109.5000  |
| C15—C5—H5    | 108.7000   | C12—C13—H13C  | 109.5000  |
| C4A—C5—H5    | 108.7000   | H13A—C13—H13C | 109.5000  |
| C5—C4A—C4    | 114.2 (4)  | H13B—C13—H13C | 109.5000  |
| C5—C4A—C9B   | 108.6 (4)  | C20—C15—C16   | 118.5 (5) |
| C4—C4A—C9B   | 109.1 (4)  | C20—C15—C5    | 119.2 (5) |
| C5—C4A—H4AA  | 108.3000   | C16—C15—C5    | 122.3 (5) |
| C4—C4A—H4AA  | 108.3000   | C15—C16—C17   | 119.6 (5) |
| C9B—C4A—H4AA | 108.3000   | C15—C16—H16   | 120.2000  |
| C10A—C6—O6   | 124.6 (4)  | C17—C16—H16   | 120.2000  |
| C10A—C6—C7   | 124.9 (5)  | C18—C17—C16   | 120.5 (5) |
| O6—C6—C7     | 110.4 (4)  | C18—C17—H17   | 119.8000  |
| C8—C7—C6     | 111.2 (5)  | C16—C17—H17   | 119.8000  |

|                     |            |                      |            |
|---------------------|------------|----------------------|------------|
| C8—C7—H7A           | 109.4000   | C19—C18—C17          | 119.7 (5)  |
| C6—C7—H7A           | 109.4000   | C19—C18—H18          | 120.1000   |
| C8—C7—H7AB          | 109.4000   | C17—C18—H18          | 120.1000   |
| C6—C7—H7AB          | 109.4000   | C18—C19—C20          | 120.8 (6)  |
| H7A—C7—H7AB         | 108.0000   | C18—C19—H19          | 119.6000   |
| C7—C8—C9            | 110.0 (6)  | C20—C19—H19          | 119.6000   |
| C7—C8—H8A           | 109.7000   | C19—C20—C15          | 120.9 (5)  |
| C9—C8—H8A           | 109.7000   | C19—C20—H20          | 119.6000   |
| C7—C8—H8AB          | 109.7000   | C15—C20—H20          | 119.6000   |
| C9—C8—H8AB          | 109.7000   | C12—N3—C4            | 118.8 (4)  |
| H8A—C8—H8AB         | 108.2000   | C12—N3—C2            | 124.9 (4)  |
| C8—C9—C10           | 113.4 (5)  | C4—N3—C2             | 115.7 (4)  |
| C8—C9—H9A           | 108.9000   | C6—O6—C5             | 116.1 (4)  |
|                     |            |                      |            |
| C9B—C1—C2—N3        | 54.3 (7)   | C4A—C9B—C10A—<br>C6  | 12.2 (7)   |
| O6—C5—C4A—C4        | -172.5 (4) | C1—C9B—C10A—<br>C10  | -54.0 (7)  |
| C15—C5—C4A—C4       | -52.7 (6)  | C4A—C9B—C10A—<br>C10 | -175.3 (5) |
| O6—C5—C4A—C9B       | 65.6 (5)   | O6—C5—C15—C20        | -140.3 (5) |
| C15—C5—C4A—<br>C9B  | -174.6 (4) | C4A—C5—C15—C20       | 99.4 (6)   |
| N3—C4—C4A—C5        | -179.3 (4) | O6—C5—C15—C16        | 37.7 (6)   |
| N3—C4—C4A—C9B       | -57.7 (6)  | C4A—C5—C15—C16       | -82.6 (6)  |
| C10A—C6—C7—C8       | 16.7 (9)   | C20—C15—C16—<br>C17  | -1.4 (8)   |
| O6—C6—C7—C8         | -164.7 (6) | C5—C15—C16—C17       | -179.5 (5) |
| C6—C7—C8—C9         | -49.2 (8)  | C15—C16—C17—<br>C18  | -0.9 (8)   |
| C7—C8—C9—C10        | 54.5 (9)   | C16—C17—C18—<br>C19  | 1.6 (9)    |
| C2—C1—C9B—<br>C10A  | 177.5 (5)  | C17—C18—C19—<br>C20  | 0.0 (9)    |
| C2—C1—C9B—C4A       | -60.2 (6)  | C18—C19—C20—<br>C15  | -2.4 (9)   |
| C5—C4A—C9B—<br>C10A | -47.2 (5)  | C16—C15—C20—<br>C19  | 3.1 (8)    |
| C4—C4A—C9B—<br>C10A | -172.1 (4) | C5—C15—C20—C19       | -178.8 (5) |
| C5—C4A—C9B—C1       | -173.2 (4) | O14—C12—N3—C4        | 3.2 (8)    |
| C4—C4A—C9B—C1       | 61.8 (5)   | C13—C12—N3—C4        | -177.8 (5) |
| C8—C9—C10—O11       | 158.0 (6)  | O14—C12—N3—C2        | 173.9 (6)  |
| C8—C9—C10—C10A      | -25.8 (9)  | C13—C12—N3—C2        | -7.1 (8)   |



|                      |            |               |            |
|----------------------|------------|---------------|------------|
| O6—C6—C10A—C10       | -165.2 (5) | C4A—C4—N3—C12 | -135.4 (5) |
| C7—C6—C10A—C10       | 13.2 (9)   | C4A—C4—N3—C2  | 53.0 (6)   |
| O6—C6—C10A—<br>C9B   | 7.5 (8)    | C1—C2—N3—C12  | 137.6 (6)  |
| C7—C6—C10A—<br>C9B   | -174.0 (6) | C1—C2—N3—C4   | -51.4 (7)  |
| O11—C10—C10A—<br>C6  | 167.8 (6)  | C10A—C6—O6—C5 | 11.3 (8)   |
| C9—C10—C10A—C6       | -8.3 (8)   | C7—C6—O6—C5   | -167.3 (5) |
| O11—C10—C10A—<br>C9B | -4.9 (8)   | C15—C5—O6—C6  | -172.8 (4) |
| C9—C10—C10A—<br>C9B  | 178.9 (5)  | C4A—C5—O6—C6  | -47.7 (6)  |
| C1—C9B—C10A—<br>C6   | 133.4 (5)  |               |            |

6. *In vitro* antiproliferative activity of the products of the domino reactions against U87, A2780 and HT-29 human cancer cell lines

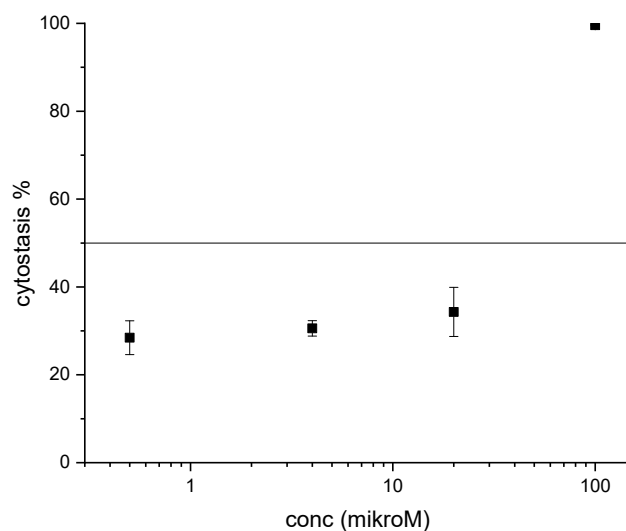

Figure S110. Concentration-dependent effect of *rac*-(4*R*\*,4*aS*\*,10*bR*\*)-*epi*-**2am** on the viability of U87 cells.

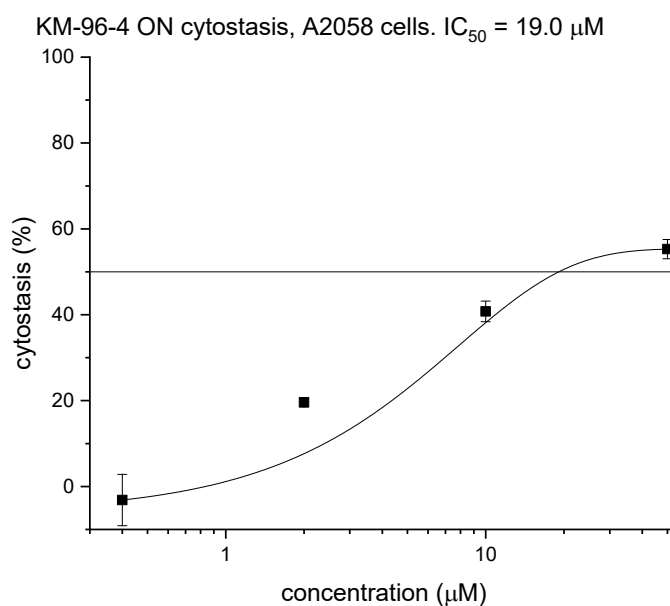

Figure S111. Concentration-dependent effect of *rac*-(4*R*\*,4*aS*\*,10*bR*\*)-*epi*-**2am** on the viability of A2780 cells.

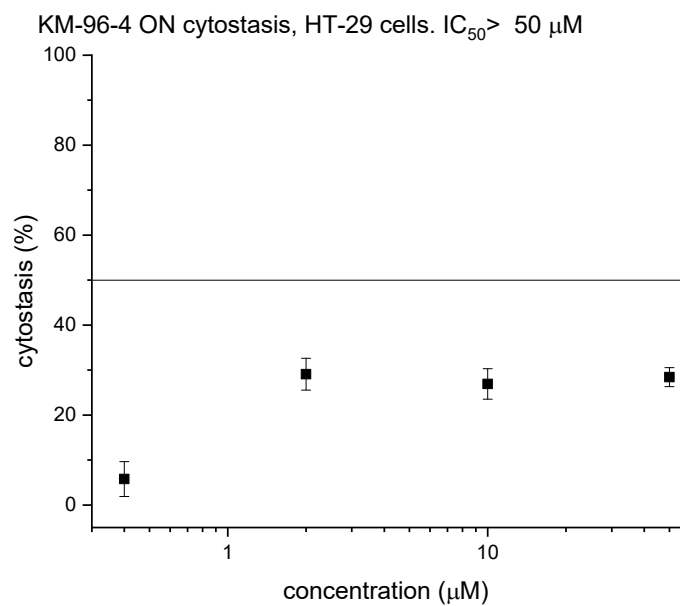

Figure S112. Concentration-dependent effect of *rac*-(4*R*\*,4*aS*\*,10*bR*\*)-*epi*-**2am** on the viability of HT-29 cells.

## 7. References:

- 1 M. Kajtár; S. B. Király; A. Bényei; A. Kiss-Szikszai; A. Kónya-Ábrahám; N. Zhang; L. B. Horváth; S. Bősze; D. Li; A. Kotschy; A. Paczal and T. Kurtán, *J. Org. Chem.* 2024, **89**, (10), 6937-6950.
